# Supplementary material for: Metaproteogenomic insights beyond bacterial response to naphthalene exposure and bio-stimulation
Source: PubMed Central journal article supplement — ISME J. 2012 Jul 26;7(1):122–36. doi: 10.1038/ismej.2012.82 (PMC3526184; doi:10.1038/ismej.2012.82), 2012-07-26
Supplement: ismej201282x1.pdf [file ismej201282x1.pdf]

**ORIGINAL ARTICLE**

*ISME Journal* – Original article

**Metaproteogenomic insights beyond bacterial response to**

**5 naphthalene exposure and bio-stimulation**

María-Eugenia Guazzaroni, Florian-Alexander Herbst, Iván Lores, Javier Tamames, Ana Isabel Peláez, Nieves López-Cortés, María Alcaide, Mercedes V. del Pozo, José María Vieites, Martin von Bergen, José Luis R. Gallego, Rafael Bargiela, Arantxa López-López, Dietmar H. Pieper, Ramón Rosselló-Móra, Jesús Sánchez, Jana Seifert and Manuel Ferrer

**10 Supporting Online Material includes**

Text (Supporting Materials and Methods)

Tables S1 to S9

Figures S1 to S7

## SUPPORTING TEXT

### Supporting Materials and Methods

#### *Soil characterisation*

Soil pH was measured in a suspension of soil and water (1:2.5) with a glass electrode, and  
5 electrical conductivity was measured in the same extract (diluted 1:5). Primary soil  
characteristics were determined using standard techniques, such as dichromate oxidation  
(organic matter content), the Kjeldahl method (nitrogen content), the Olsen method  
(phosphorus content) and a Bernard calcimeter (carbonate content). The Bouyoucos  
Densimetry method was used to establish textural data. Exchangeable cations (Ca, Mg, K and  
10 Na) extracted with 1 M  $\text{NH}_4\text{Cl}$  and exchangeable aluminium extracted with 1 M KCl were  
determined using atomic absorption/emission spectrophotometry with an AA200  
PerkinElmer analyser. The effective cation exchange capacity (ECEC) was calculated as the  
sum of the values of the last two measurements (sum of the exchangeable cations and the  
exchangeable Al). Analyses were performed immediately after sampling.

15

#### *Hydrocarbon analysis*

Extraction (5 g of sample N and Nbs) was performed with dichloromethane:acetone (1:1)  
using a Soxtherm extraction apparatus (Gerhardt GmbH & Co. KG, Köln, Germany), followed  
by silica gel purification. The final extract was analysed via GCMS (Shimadzu QP2010Plus  
20 equipment) using a Factor Four VF-5 ms (5% phenyl 95% dimethylpolysiloxane) column (30  
m x 0.25 mm, 0.25  $\mu\text{m}$ ) from Varian. The initial temperature was set to 70°C (maintained for  
2 min), and the temperature was increased by 20°C/min up to 220°C and then by 10°C/min  
up to 300°C (maintained for 7 min). The injector temperature was maintained at 260°C  
working in splitless mode. Helium gas (purity of 99.999%) was used at a flow rate of 1

ml/min. Detection was performed in the EI (electronic ionisation) mode, and the ionisation source and the transfer line were maintained at 220°C and 260°C, respectively. For the quantification of metabolites, a selective ion monitoring mode (SIM) was used, selecting the *m/z* ratio characteristics of the PAHs of interest. Analyses were performed immediately after  
5 sampling.

#### *DNA extraction*

Six grams of soil N and Nbs were processed for DNA extraction. Highly purified suspension of soil microorganisms was obtained via density gradient centrifugation using Nycodenz (Axis-  
10 Shield PoC, Norway) resin, as described previously (Guazzaroni *et al.*, 2010). The resulting cell pellet was subjected to metagenomic DNA extraction using a Meta-Gnome® DNA extraction Kit (Epicentre, Madison, WI, USA), which incorporates mechanical lysis. The obtained DNA was visualised using 0.7% (wt/vol) agarose gel electrophoresis and quantified both spectrophotometrically and using PicoGreen (Molecular Probes, Carlsbad, CA). For  
15 enrichment cultures, 100 ml of the culture was centrifuged at 4000 g x for 15 min, and DNA was extracted using a Meta-Genome® DNA extraction Kit (Epicentre). Note: top soil sample N was sampled in February 2007 and stored at -20°C until DNA was isolated in March 2010; top soil sample Nbs was sampled 231 days later than sample N and stored at -20°C until DNA was isolated in February 2012; DNA from enrichment cultures CN1 and CN2 were extracted  
20 in March 2010 from stable cultures maintained by using serial batch culturing.

#### *Construction of 16S RNA gene clone libraries, sequencing and phylogenetic analysis*

Bacterial 16S RNA genes were amplified using the bacteria-specific primers F27 (5'-AGAGTTTGATCMTGGCTCAG-3') and R1492 (5'-CGGYTACCTTGTTACGACTT-3'). Amplification

was performed in a 20 µl reaction volume with recombinant *Taq* DNA polymerase (Invitrogen, Germany) and reagents according to the basic PCR protocol at an annealing temperature of 45°C for 30 cycles. PCR amplicons were purified using electrophoresis on 0.8% (wt/vol) agarose gels, followed by isolation from excised bands using a QIAEX II Gel Extraction Kit (Qiagen, Germany). The purified PCR products were ligated into pGEM plasmid vectors (pGEM Cloning kit, Promega, Madison, USA), which were subsequently transformed into electrocompetent cells of *E. coli* (TOP 10) (Invitrogen, Germany). The obtained bacterial rDNA clones were sequenced via primer walking using the M13 forward (5'-GACGTTGTAACGACGGCCAG-3') and M13 reverse (5'-GAGGAAACAGCTATGACCATG-3') primers according to the protocol of the BigDye Terminator v3.1 Cycle Sequencing Kit from Applied Biosystems (USA). The sequencing reactions were analysed using AB 3730 xl equipment from Applied Biosystems (USA).

Phylogenetic inference of the 16S RNA gene sequences was carried out using the ARB software package (Ludwig *et al.*, 2004). The sequences were automatically aligned using the SINA aligner (E. Pruesse, unpublished) against the SILVA SSURef 102 (Pruesse *et al.*, 2007) and LTP s108 (Yarza *et al.*, 2008) reference alignments and were manually inspected to correct inaccurately situated bases. To improve resolution at lower taxonomic levels, two independent reference phylogenetic trees were constructed, one comprised of members of the phylum *Proteobacteria* and a second including the remaining bacterial phyla. The distinct datasets with nearly complete SSU sequences were first sieved with a 40% conservational filter, and the phylogeny was then reconstructed using the neighbour-joining algorithm with the Jukes-Cantor correction. The resulting tree topologies were carefully checked against the currently accepted classification of *Prokaryotes* (LPSN, <http://www.bacterio.cict.fr>) to verify the absence of incongruent phylogenetic relationships.

In addition to the clone affiliations, the partial sequences extracted from the metagenome of the sample Nbs were checked. From the >300 sequences identified in the metagenome, we just used those with a length >600 nucleotides. Shorter sequences were discarded as being not enough informative. Partial sequences were aligned as above mentioned, and inserted into the pre-existing Neighbour Joining tree using the ARB parsimony tool (Ludwig et al., 2004).

In order to recognize biologically meaningful units we grouped phylogenetic clades into Operational Phylogenetic Units (OPUs). We considered an OPU (López-López *et al.*, 2010) to be represented by each single group of clones that formed an independent clade in the tree without considering a rigid similarity cut-off value. As it can be seen in the supplementary **Table S2**, nearly all OPUs shared internal identity >97%, a value that nearly guarantees each of them to be considered a single species from the taxonomic point of view (Yarza et al., 2008). The OPUs were plotted in a rarefaction curve (**Figure S4**). Statistical analyses were performed using the PAST program (Hammer *et al.*, 2001).

15

#### *DGGE analysis*

The V3–V5 variable regions of the 16S rDNA gene were amplified using 16F341-GC and 16R907 primers (Yu and Morrison, 2004). The F341-GC primer included a GC clamp at the 5' end (5'-CGCCCGCCGCGCCCGCGCCCGTCCCGCCGCCCCGCCCCG-3'). The PCR profile used with the F341GC/R907 primer set consisted of an initial denaturation of 5 min at 94°C, followed by 25 cycles of one denaturation step for 1 min at 94°C, one annealing step for 1 min at 57°C, and one elongation step for 45 s at 72°C. The last step involved an extension for 10 min at 72°C. Approximately 400 ng of purified PCR product was loaded onto a 6% (w/v) polyacrylamide gel (1 mm thick), with denaturing gradients ranging from 40% to 65% (100%

denaturant contains 7 M urea and 40% formamide (w/v)). The DGGE analysis was performed in a 0.5× Tris-acetate-ethylenediaminetetraacetic acid (TAE) buffer solution (40 mM Tris, 20 mM sodium acetate, 1 mM EDTA, pH 7.4) using a DCode Universal Mutation Detection System (BioRad Laboratories, Inc., CA). DGGE gels were stained for 45 min in water solution containing SybrGold (Molecular Probes, Inc., Eugene, OR, USA) and then scanned under UV using Gel Logic 200 Imaging System (Kodak, Bionova, Canada). Individual bands were excised from the denaturing gradient gels and eluted in water (Martínez-Pascual *et al.*, 2010), and some of the obtained products were subjected to sequencing.

#### 10 *Metagenomic setup: sequencing, assembly and gene prediction and analysis*

Sequencing was performed using a Roche 5 GS FLX DNA sequencer (454 Life Sciences) (Life Sequencing S.L, Valencia, Spain) as described previously (Ferrer *et al.*, 2011). Eleven micrograms of total DNA at an average concentration of 286 ng/μl were used for sequencing of the samples.

15 The reads from each sample were individually assembled to generate non-redundant metasequences using Newbler GS De Novo Assembler v.2.3 (Roche). An estimated error rate (incorrect bases/total number of expected nucleotides) of 0.49% was considered for the GS20 reads (Huse *et al.*, 2007). The error rates for the GS20 reads were calculated using the Needleman-Wunsch algorithm (Needleman and Wunsch, 1970). The MetaGene (Noguchi *et al.*, 2006) and MetaGeneMark programs, which are based on a hidden Markov model (HMM) algorithm, were employed to predict potential protein-coding regions (open reading frames, ORFs with  $\geq 20$  amino acids) from the sequences of each sample. When both predictions were coincident, the corresponding ORF start and end positions were kept. When the predictions did not agree, homology searching via BLASTX helped to resolve the

inconsistencies by identifying the most complete gene. The start and end positions for these genes were adequately set. Homology searching was also used to infer genes that were not detected by the gene predictors. The complete sequences of the contigs were analysed via BLASTX searching against the GenBank non-redundant (nr) database, and nucleotide and amino acid sequences for the putative genes and proteins obtained were retrieved.

Each gene was ascribed to COG (Tatusov *et al.*, 2001) and KEGG (Kanehisa *et al.*, 2008) functional categories. The following procedure was used for this: homology searches were performed with the nucleotide sequences of the contigs using BLASTN and BLASTX against the GenBank nr database. The obtained hits were filtered based on a minimum e-value ( $1e^{-03}$ ) and an alignment length of 75% minimum. The accession number of the hits was used to retrieve COG, KEGG and SEED annotations if available. The maximum expected bitscore for the gene was also obtained via self-alignment and was used to normalise all bitscores for the hits. We took the first five hits of each COG (Tatusov *et al.*, 2001), KEGG (Kanehisa *et al.*, 2008) or SEED (Overseek *et al.*, 2005) and calculated its average normalised score (ANS). A gene was assigned to a functional category that corresponded to an ANS at least 20% higher than any other. If the ANS difference was less than 20%, no function was assigned. Our tests indicated that this procedure yielded more than 95% correct assignments (based on the application of a number of tests performed using controlled sets of sequences assigned to COGs, KEGG and SEED from completely sequenced genomes). Functional assignment of the predicted genes involved in degradation was made on the basis of BLASTP analysis against an in-house database that contained gene sequences encoding enzymes that usually perform key catalysing steps in the aerobic degradation of pollutants via di- and trihydroxylated intermediates (**Table S8**). These enzymes included Rieske non-heme iron oxygenases, type I extradiol dioxygenases of the vicinal oxygen chelate superfamily, the type II or LigB

superfamily extradiol dioxygenases, and the type III extradiol dioxygenases belonging to the cupin superfamily as well as intradiol dioxygenases (Pérez-Pantoja *et al.*, 2011). Well-characterised key oxygenase sequences that have been documented as being involved in the catabolism of aromatics were used as initial seeds for similarity searches using the BLASTP program from the NCBI website (Altschul *et al.*, 1997). Translated protein sequences were aligned with MUSCLE using default values (Edgar, 2004). Phylogenetic trees were constructed with MEGA4 (Tamura *et al.*, 2007) using the neighbour-joining algorithm (Saitou and Nei, 1987). The phylogenetic trees were inspected to detect proteins with similarities to proteins with documented functions.

Taxonomic assignment was performed in the same way as functional assignment. The complete taxonomy of the homologs was retrieved, and the ANS for each of the taxa at different phylogenetic ranks (kingdom, phylum, class, order, family and genus) was computed. Homology searches were also used in the recruitment analysis for particular genomes. Complete genome sequences were obtained from NCBI and used to map the contigs with the best hit against that particular genome. Common numbers of sequences between the different samples were obtained by clustering the sequences with the cd-hit program using different levels of identity. To identify potential metabolic pathways, genes were evaluated for similarity compared to the KEGG database. A match was counted if the similarity analysis resulted in an expectation E value below  $1e^{-05}$ . All obtained KEGG orthology (KO) numbers were mapped against KEGG pathway functional hierarchies and statistically analysed.

For calculating the over-representation of proteins and functions between metagenomes, we followed the z test for independent proportions proposed by Li (2009). Briefly, given  $N_A$ ,  $N_B$  (the number of observations of a particular protein or function in



metagenomes A and B),  $H_A$ , and  $H_B$  (the total number of observations in metagenomes A and B), there are three occurrence rates  $P_A = H_A/N_A$ ,  $P_B = H_B/N_B$ , and  $P = (H_A+H_B)/(N_A+N_B)$ . The statistical significance between A and B can be described by:

$$z = \frac{P_A - P_B}{\sqrt{P(1-P)\left(\frac{1}{N_A} + \frac{1}{N_B}\right)}}$$

5 Confidence levels of 0.95 and 0.99 are defined by z values of 1.96 and 2.58, and minimum  $H_A$  values of 4 and 7, respectively (Li, 2009).

The complete set of gene annotation features including, ORF ID, contig, contig length, GC content per contig, GC content per ORF, ORF length and ORF start and end positions, putative function, best hit, closest hit and putative phylogeny as well as COG, KEGG and SEED  
10 annotations are shown in details in **Table S9**.

*Metaproteomic setup: protein extraction, separation and identification and data processing*

Cells (triplicates) were harvested from the same enrichment cultures CN1 and CN2 (60 transfers) used also for DNA isolation, via centrifugation at 10 000 × g for 10 min. The pellets  
15 were suspended in 4 ml of the BugBuster® protein extraction reagent by vortexing. Then, 1 mg/ml of lysozyme and DNase I were added, and the samples were incubated for 30 min on ice. Subsequently, 10 µl of lysonase was added, and the samples were incubated for 60 min on ice. Bacterial suspensions were subsequently ultra-sonicated for 2.5 min on ice, after which the extract was centrifuged for 10 min at 12 000 g to separate cell debris and intact  
20 cells. The supernatant was carefully aspirated (to avoid disturbing the pellet) and transferred to a new tube, and the protein extracts were then subjected to acetone precipitation (5 vol of acetone per 1 vol of sample solution) and stored at -86°C until use. Protein concentrations

were determined by resuspending the precipitated proteins in 50 mM Tris/HCl (pH 7.0) and using the Bradford assay (Bradford, 1976). Then, 14 µg of three replicates of each the CN1 and CN2 samples was subjected to 1-D SDS PAGE, and the separated proteins were stained with Coomassie Blue. Ten sections of each lane were excised following SDS-PAGE, and the sections were de-stained and subsequently proteolytically digested overnight at 37°C using trypsin (Sigma, Munich, Germany) as previously described (Jehmlich *et al.*, 2008). The eluted peptides were purified and concentrated using C18 Zip Tip columns (Millipore).

For LTQ-Orbitrap mass spectrometer analysis, the peptides were reconstituted in 0.1% formic acid. The samples were injected using the autosampler and concentrated in a trapping column (nanoAcquity UPLC column, C18, 180 µm x 2 cm, 5 µm, Waters) with water containing 0.1% formic acid at a flow rate of 15 µL min<sup>-1</sup>. After 6 min, the peptides were eluted into a separation column (nanoAcquity UPLC column, C18, 75 µm x 10 cm, 1.75 µm, Waters). Chromatography was performed with 0.1% formic acid in solvents A (100% water) and B (100% acetonitrile). To elute the peptides, the solvent B gradient was set at 2 to 20% in the first 54 min and subsequently at 20 to 85% for 28 min using a nano-high pressure liquid chromatography (nano-HPLC) system (nanoAcquity, Waters) coupled with an LTQ-Orbitrap mass spectrometer (Thermo Fisher Scientific). To achieve an unbiased analysis, continuous scanning of the eluted peptide ions was carried out between 300 – 2000 *m/z*, automatically switching to MS/MS collision-induced dissociation (CID) mode for ions that exceeded an intensity of 3000. For MS/MS CID measurements, a dynamic precursor exclusion of 3 min was enabled.

For identification and retrieval of protein intensities, MaxQuant version 1.1.1.25 was used (Cox and Mann, 2008). Analyses of all fractions were performed simultaneously, such that ten gel slices per replicate were combined into one experiment (2 samples x 3 replicates

x 10 gel slices). Peptide identification was performed using Andromeda implemented in MaxQuant (Cox *et al.*, 2011) against the CN1 and CN2 pyro-sequences in the form of forward and reverse entries as decoys. Cysteine carbamidomethylation was searched for as a fixed modification, whereas methionine oxidation was searched for as a variable modification. The maximal false discovery rate was set to 1% for the peptides. The offered *first search* was performed with a mass tolerance of 20 ppm. Proteins were regarded as convincingly identified if at least two unique peptides were found. In addition to activating the *match between runs* with a time window of 2 min and a unique peptide count of at least 2, the standard MaxQuant settings were used.

10 The raw protein intensities corresponded to the sum of the peptide intensities. Thus, larger proteins, which contain significantly more tryptic peptides, have higher intensities. To eliminate the influence of the number of peptide hits, the protein intensities were divided by the number of peptides, which were dedicated to the protein of interest. These *per peptide* intensities were summed for every replicate, and the averages of the *summed* intensities of the three replicates for CN1 and CN2 were calculated. The average total intensities for CN1 and CN2 were divided by the corresponding *summed* replicate intensities. The obtained quotient served as a normalisation factor. To correct for different protein loads, all *per peptide* intensities were multiplied by their normalisation factor. If normalised *per peptide* intensities based on at least two peptides could be established in at least two replicates, the average was calculated and reported as the quantitative value for the protein of interest.

## References

- Altschul SF, Madden TL, Schäffer AA, Zhang J, Zhang Z, Miller W, Lipman, DJ. (1997). Gapped BLAST and PS I-BLAST: a new generation of protein database search programs. *Nucleic Acids Res* **25**: 3389-3402.
- Bradford MM. (1976). A rapid and sensitive method for the quantitation of microgram quantities of protein utilizing the principle of protein-dye binding. *Anal Biochem* **72**: 248–254.
- Cox J, Mann M. (2008). MaxQuant enables high peptide identification rates, individualized p.p.b.-range mass accuracies and proteome-wide protein quantification. *Nat Biotechnol* **26**: 1367–1372.
- 10 Cox J, Neuhauser N, Michalski A, Scheltema RA, Olsen JV, Mann M. (2011). Andromeda - a peptide search engine integrated into the MaxQuant environment. *J Proteome Res* **10**: 1794–1805.
- Edgar RC. (2004). MUSCLE: a multiple sequence alignment method with reduced time and space complexity. *BMC Bioinformatics* **5**: 113.
- 15 Ferrer M, Guazzaroni ME, Richter M, García-Salamanca A, Yarza P, Suárez-Suárez A. (2011). Taxonomic and functional metagenomic profiling of the microbial community in the anoxic sediment of a sub-saline shallow lake (Laguna de Carrizo, Central Spain). *Microb Ecol* **62**: 824–837.
- Guazzaroni M-E, Golyshin PN, Ferrer M. (2010). Molecular methods to study complex microbial communities. In: Marco, D (ed). *Metagenomics: Theory, Methods and Applications*. Caister Academic Press (Portland), pp 55–77.
- 20 Hammer Ø, Harper D, Ryan P. (2001). PAST: Paleontological statistics software package for education and data analysis. *Palaeontologia Electronica* **4**: 1–9.

- Huse SM, Huber JA, Morrison HG, Sogin ML, Weich DM (2007) Accuracy and quality of massively parallel DNA pyrosequencing. *Genome Biol* **8**: R143.
- Jehmlich N, Schmidt F, Hartwich M, von Bergen M, Richnow HH, Vogt C. (2008). Incorporation of carbon and nitrogen atoms into proteins measured by protein-based stable isotope probing (Protein-SIP). *Rapid Commun Mass Spectrom* **22**: 2889–2897.
- 5 Kanehisa M, Araki M, Goto S, Hattori M, Hirakawa M, Itoh M *et al.* (2008). KEGG for linking genomes to life and the environment. *Nucleic Acids Res* **36**: D480–D484.
- Li W. (2009). Analysis and comparison of very large metagenomes with fast clustering and functional annotation. *BMC Bioinformatics* **10**: 359.
- 10 Ludwig W, Strunk O, Westram R, Richter L, Meier H, Yadhukumar *et al.* (2004) ARB: a software environment for sequence data. *Nucleic Acids Res* **32**: 1363–1371.
- Needleman SB, Wunsch CD. (1970). A general method applicable to the search for similarities in the amino acid sequence of two proteins. *J Mol Biol* **48**: 443–453.
- Noguchi H, Park J, Takagi T. (2006). MetaGene: prokaryotic gene finding from environmental genome shotgun sequences. *Nucleic Acids Res* **34**: D5623–5630.
- 15 Overbeek R, Begley T, Butler RM, Choudhuri JV, Chuang HY, Cohoon M, *et al.* (2005). The subsystems approach to genome annotation and its use in the project to annotate 1000 genomes. *Nucleic Acids Res* **33**: 5691-5702.
- Pruesse E, Quast C, Knittel K, Fuchs BM, Ludwig W, Peplies J, Glöckner FO. (2007). SILVA: a comprehensive online resource for quality checked and aligned ribosomal RNA sequence data compatible with ARB. *Nucleic Acids Res* **35**: 7188-7196.
- 20 Saitou N, Nei M. (1987). The neighbor-joining method: a new method for reconstructing phylogenetic trees. *Mol Biol Evol* **4**: 406–425.

- Schloss PD, Handelsman J. (2005). Introducing DOTUR, a computer program for defining operational taxonomic units and estimating species richness. *Appl Environ Microbiol* **71**: 1501–1506.
- 5 Tamura K, Dudley J, Nei M, Kumar S. (2007). MEGA4: Molecular Evolutionary Genetics Analysis (MEGA) software version 4.0. *Mol Biol Evol* **24**: 1596–1599.
- Tatusov RL, Natale DA, Garkavtsev IV, Tatusova TA, Shankavaram UT, Rao BS *et al.* (2001). The COG database: new developments in phylogenetic classification of proteins from complete genomes. *Nucleic Acids Res* **29**: 22–28.
- 10 Yu Z, Morrison M (2004). Comparisons of different hypervariable regions of rrs genes for use in fingerprinting of microbial communities by PCR-denaturing gradient gel electrophoresis. *Appl Environ Microbiol* **70**: 4800–4806

## SUPPORTING TABLES

**Table S1** Initial soil characteristics. All the values are an average of three measurements on distinct replicas of the original soil sample N.

|                                        |                          |            |
|----------------------------------------|--------------------------|------------|
| <b>Texture</b>                         | Sand (2 mm – 63 $\mu$ m) | 43%        |
|                                        | Silt (63 – 2 $\mu$ m)    | 19%        |
|                                        | Clay (< 2 $\mu$ m)       | 39%        |
| <b>Chemical parameters<sup>1</sup></b> | pH                       | 8.2        |
|                                        | Conductivity             | 0.13 mS/cm |
|                                        | Organic Matter           | 0.20 % w/w |
|                                        | Total Nitrogen           | 0.03 % w/w |
|                                        | C/N ratio                | 3.9        |
|                                        | Phosphorus               | <2.6 mg/kg |
|                                        | Carbonate Content        | 0.72 % w/w |
|                                        | Potassium                | 64 mg/kg   |
|                                        | Magnesium                | 80 mg/kg   |
|                                        | Calcium                  | 3160 mg/kg |
|                                        | Sodium                   | 19 mg/kg   |

<sup>1</sup>Soil characteristics and chemical parameters were determined using standard techniques described in the **Supplementary Materials and Methods**.

**Table S2** Prokaryotic diversity and microbial composition blueprints of N, Nbs, CN1 and CN2 communities. Tentative phylogenetic affiliations are specifically shown.

| OPUS<br>S<br>CN1 <sup>1</sup> | OPUS<br>S<br>CN2 <sup>1</sup> | OPUS<br>S<br>N <sup>1</sup> | OPUS<br>Nbs<br>16S<br>rDNA<br>clones <sup>1</sup> | OPUS<br>Nbs<br>454<br>partial<br>sequen<br>ces <sup>1</sup> | OPUS<br>Nbs<br>total <sup>1</sup> | OPU <sup>1</sup> | Clones <sup>1</sup>                                                                                                                                                                                                                                                                                                                                                                                                                                                                                                                                                                                                      | Minimal<br>internal<br>identity <sup>2</sup> | Closest related<br>species <sup>2</sup> | Phylum <sup>2</sup>        | Family <sup>2</sup>     |
|-------------------------------|-------------------------------|-----------------------------|---------------------------------------------------|-------------------------------------------------------------|-----------------------------------|------------------|--------------------------------------------------------------------------------------------------------------------------------------------------------------------------------------------------------------------------------------------------------------------------------------------------------------------------------------------------------------------------------------------------------------------------------------------------------------------------------------------------------------------------------------------------------------------------------------------------------------------------|----------------------------------------------|-----------------------------------------|----------------------------|-------------------------|
|                               | 48                            | 1                           | 12                                                | 12                                                          | 24                                | 1                | N-144, CN2-28, CN2-72, CN2-58, CN2-78, CN2-15, CN2-26, CN2-99, CN2-42, CN2-21, CN2-02, CN2-07, CN2-12, CN2-46, CN2-74, CN2-108, CN2-16, CN2-71, CN2-106, CN2-114, CN2-68, CN2-56, CN2-102, CN2-63, CN2-64, CN2-81, CN2-110, CN2-76, CN2-10, CN2-112, CN2-09, CN2-65, CN2-104, CN2-05, CN2-11, CN2-31, CN2-06, CN2-48, CN2-91, CN2-111, CN2-60, CN2-83, CN2-103, CN2-82, CN2-107, CN2-24, CN2-36, CN2-88, CN2-35, CN2-88, Nbs-59, Nbs-61, Nbs-63, Nbs-30, Nbs-70, Nbs-19, Nbs-89, Nbs-25, Nbs-69, Nbs-84, Nbs-10, Nbs-21, Nbs261, Nbs222, Nbs202, Nbs123, Nbs271, Nbs238, Nbs106, Nbs 165, Nbs120, Nbs201, Nbs212, Nbs147 | 99.2                                         | <i>Pseudomonas stutzeri</i> GV 1        | <i>Gammaproteobacteria</i> | <i>Pseudomonadaceae</i> |
|                               |                               |                             | 1                                                 | 2                                                           | 3                                 | 2                | Nbs-14, Nbs110, Nbs209                                                                                                                                                                                                                                                                                                                                                                                                                                                                                                                                                                                                   | 0                                            | <i>Pseudomonas alcaligenes</i>          | <i>Gammaproteobacteria</i> | <i>Pseudomonadaceae</i> |
|                               |                               | 6                           | 1                                                 | 3                                                           | 4                                 | 3                | N-154, N-75, N-178, N-25, N-68, N-216, N-173, Nbs-15, Nbs223, Nbs270, Nbs241                                                                                                                                                                                                                                                                                                                                                                                                                                                                                                                                             | 99.8                                         | <i>Pseudomonas stutzeri</i> GV 3        | <i>Gammaproteobacteria</i> | <i>Pseudomonadaceae</i> |
|                               | 1                             |                             | 1                                                 | 7                                                           | 8                                 | 4                | CN2-40, Nbs-73, Nbs158, Nbs260, Nbs236, Nbs105, Nbs, 176, Nbs118, Nbs174                                                                                                                                                                                                                                                                                                                                                                                                                                                                                                                                                 | 99.8                                         | <i>Pseudomonas</i> sp.                  | <i>Gammaproteobacteria</i> | <i>Pseudomonadaceae</i> |
|                               |                               | 5                           | 2                                                 | 8                                                           | 10                                | 5                | N-110, N-55, N-128, N-151, N-119, Nbs-93, Nbs-75, Nbs115, Nbs254, Nbs224, Nbs, 107, Nbs256, Nbs150, Nbs177, Nbs275                                                                                                                                                                                                                                                                                                                                                                                                                                                                                                       | 99.2                                         | <i>Pseudomonas stutzeri</i> M14C        | <i>Gammaproteobacteria</i> | <i>Pseudomonadaceae</i> |
|                               |                               |                             | 6                                                 | 15                                                          | 21                                | 6                | Nbs76, Nbs-48, Nbs-11, Nbs-88, Nbs-64, Nbs-2, Nbs252, Nbs230, Nbs233, Nbs145, Nbs272, Nbs221 Nbs253, Nbs269, Nbs251, Nbs231, Nbs264, Nbs152, Nbs207, Nbs136, Nbs243                                                                                                                                                                                                                                                                                                                                                                                                                                                      |                                              | <i>Pseudomonas tuomuerensis</i>         | <i>Gammaproteobacteria</i> | <i>Pseudomonadaceae</i> |
|                               |                               | 1                           |                                                   |                                                             |                                   | 7                | N-179                                                                                                                                                                                                                                                                                                                                                                                                                                                                                                                                                                                                                    | 0                                            | <i>Pseudomonas argentinensis</i>        | <i>Gammaproteobacteria</i> | <i>Pseudomonadaceae</i> |
|                               |                               |                             | 2                                                 | 6                                                           | 8                                 | 8                | Nbs-24, Nbs-72, Nbs114, Nbs193, Nbs166, Nbs226, Nbs204, Nbs183                                                                                                                                                                                                                                                                                                                                                                                                                                                                                                                                                           | 98.6                                         | <i>Pseudomonas pertucinogena</i>        | <i>Gammaproteobacteria</i> | <i>Pseudomonadaceae</i> |
|                               |                               |                             | 3                                                 | 17                                                          | 20                                | 9                | Nbs-12, Nbs-53, Nbs-27, Nbs101, Nbs242, Nbs205, Nbs219, Nbs245, Nbs140, Nbs217, Nbs157, Nbs253, Nbs239, Nbs168, Nbs186, Nbs195, Nbs139, Nbs279, Nbs151, Nbs210                                                                                                                                                                                                                                                                                                                                                                                                                                                           | 99.1                                         | <i>Pseudomonas</i> sp.                  | <i>Gammaproteobacteria</i> | <i>Pseudomonadaceae</i> |
|                               |                               | 4                           | 1                                                 |                                                             | 1                                 | 10               | N-103, N-74, N-33, N-02, Nbs-44                                                                                                                                                                                                                                                                                                                                                                                                                                                                                                                                                                                          | 99.4                                         | <i>Pseudomonas guineae</i>              | <i>Gammaproteobacteria</i> | <i>Pseudomonadaceae</i> |



|    |    |    |   |   |   |    |                                                                                                                                                                                                                                                                                                                                                                                                                                          |      |                                       |                            |                         |
|----|----|----|---|---|---|----|------------------------------------------------------------------------------------------------------------------------------------------------------------------------------------------------------------------------------------------------------------------------------------------------------------------------------------------------------------------------------------------------------------------------------------------|------|---------------------------------------|----------------------------|-------------------------|
|    |    | 65 |   |   |   | 11 | N-120, N-152, N-130, N-170, N-116, N-212, N-159, N-57, N-10, N-177, N-34, N-208, N-86, N-81, N-89, N-100, N-95, N-98, N-72, N-183, N-50, N-35, N-194, N-119, N-142, N-37, N-44, N-01, N-77, N-211, N-47, N-105, N-111, N-118, N-166, N-24, N-69, N-61, N-49, N-195, N-60, N-87, N-181, N-82, N-141, N-205, N-171, N-53, N-201, N-218, N-123, N-190, N-13, N-140, N-129, N-200, N-156, N-174, N-16, N-91, N-143, N-199, N-97, N150, N-210 | 99.2 | <i>Pseudomonas amygdali</i>           | <i>Gammaproteobacteria</i> | <i>Pseudomonadaceae</i> |
|    |    | 1  |   |   |   | 12 | N-193                                                                                                                                                                                                                                                                                                                                                                                                                                    | 0    | <i>Pseudomonas brassicacearum</i>     | <i>Gammaproteobacteria</i> | <i>Pseudomonadaceae</i> |
|    |    | 22 |   |   |   | 13 | N-28, N-94, N-146, N-113, N-180, N-101, N-121, N-07, N-56, N-67, N-21, N-71, N-20, N-09, N-26, N-39, N-169, N-42, N-163, N-167, N-22, N-153                                                                                                                                                                                                                                                                                              | 99.2 | <i>Pseudomonas putida</i>             | <i>Gammaproteobacteria</i> | <i>Pseudomonadaceae</i> |
|    |    |    | 1 | 2 | 3 | 14 | Nbs-86                                                                                                                                                                                                                                                                                                                                                                                                                                   | 0    | <i>Pseudomonas</i> sp.                | <i>Gammaproteobacteria</i> |                         |
|    |    | 1  |   |   | 0 | 15 | N-05                                                                                                                                                                                                                                                                                                                                                                                                                                     | 0    | <i>Azotobacter vinelandii</i>         | <i>Gammaproteobacteria</i> | <i>Pseudomonadaceae</i> |
|    |    |    | 1 | 2 | 3 | 16 | Nbs-90                                                                                                                                                                                                                                                                                                                                                                                                                                   | 0    | <i>Pseudomonas</i> sp.                | <i>Gammaproteobacteria</i> |                         |
|    |    | 1  |   |   |   | 17 | N-46                                                                                                                                                                                                                                                                                                                                                                                                                                     | 0    | <i>Alkanidiges illinoisensis</i>      | <i>Gammaproteobacteria</i> | <i>Moraxellaceae</i>    |
| 11 |    |    |   |   |   | 18 | CN1-108, CN1-40, CN1-86, CN1-52, CN1-72, CN1-91, CN1-110, CN1-84, CN1-88, CN1-45, CN1-14, CN1-104, CN1-78, CN1-02, CN1-17, CN1-34, CN1-31, CN1-24, CN1-24, CN1-89, CN1-50, CN1-92, CN1-64, CN1-82, CN1-83, CN1-59                                                                                                                                                                                                                        | 98.9 | <i>Legionella lytica</i>              | <i>Gammaproteobacteria</i> | <i>Legionellaceae</i>   |
|    | 15 |    |   |   |   | 19 | CN2-29, CN2-98, CN2-01, CN2-59, CN2-89, CN2-44, CN2-33, CN2-34, CN2-113, CN2-57, CN2-13, CN2-80, CN2-109, CN2-54, CN2-86                                                                                                                                                                                                                                                                                                                 | 99.3 | <i>Pseudomonas geniculata</i>         | <i>Gammaproteobacteria</i> | <i>Pseudomonadaceae</i> |
|    |    | 12 |   |   |   | 20 | N-114, N-133, N-70, N-132, N-90, N-32, N-172, N-17, N-165, N-96, N-40, N-168                                                                                                                                                                                                                                                                                                                                                             | 98.7 | <i>Stenotrophomonas chelatiphaga</i>  | <i>Gammaproteobacteria</i> | <i>Xanthomonadaceae</i> |
|    |    | 8  |   |   |   | 21 | N-36, N-59, N-43, N-160, N-196, N-52, N-64, N-164                                                                                                                                                                                                                                                                                                                                                                                        | 99.3 | <i>Stenotrophomonas rhizophila</i>    | <i>Gammaproteobacteria</i> | <i>Xanthomonadaceae</i> |
|    |    | 28 | 1 | 3 | 4 | 22 | N-88, N-107, N-108, N-109, N-187, N-176, N-137, N-213, N-148, N-182, N-185, N-139, N-79, N-27, N-149, N-158, N-204, N-186, N-162, N-65, N-203, N-136, N-92, N-115, N-126, N62, N84, N117, Nbs-22, Nbs278, Nbs104, Nbs218                                                                                                                                                                                                                 | 97.1 | <i>Pseudoxanthomonas spadix</i>       | <i>Gammaproteobacteria</i> | <i>Xanthomonadaceae</i> |
| 6  |    |    |   |   |   | 23 | CN1-19, CN1-94, CN1-87, CN1-77, CN1-79, CN1-09,                                                                                                                                                                                                                                                                                                                                                                                          | 99.5 | <i>Pseudoxanthomonas japonensis</i>   | <i>Gammaproteobacteria</i> | <i>Xanthomonadaceae</i> |
|    |    | 2  |   |   |   | 24 | N-198, N-04                                                                                                                                                                                                                                                                                                                                                                                                                              | 99.6 | <i>Pseudoxanthomonas yeongjuensis</i> | <i>Gammaproteobacteria</i> | <i>Xanthomonadaceae</i> |
|    |    | 1  |   |   |   | 25 | N-03                                                                                                                                                                                                                                                                                                                                                                                                                                     | 0    | <i>Pseudoxanthomonas broegbernens</i> | <i>Gammaproteobacteria</i> | <i>Xanthomonadaceae</i> |
|    |    | 1  |   |   |   | 26 | N-15                                                                                                                                                                                                                                                                                                                                                                                                                                     | 0    | <i>Thermomonas lysobacter oryzae</i>  | <i>Gammaproteobacteria</i> | <i>Xanthomonadaceae</i> |
|    |    |    | 1 |   | 1 | 27 | Nbs-3                                                                                                                                                                                                                                                                                                                                                                                                                                    | 0    | <i>Lysobacter</i> sp.                 | <i>Gammaproteobacteria</i> |                         |

|    |    |   |   |   |    |    |                                                                                                                                                                                                                                                                                                           |      |                                        |                            |                            |
|----|----|---|---|---|----|----|-----------------------------------------------------------------------------------------------------------------------------------------------------------------------------------------------------------------------------------------------------------------------------------------------------------|------|----------------------------------------|----------------------------|----------------------------|
| 7  | 29 |   |   | 1 | 1  | 28 | CN1-97, CN1-101, CN1-55, CN1-30, CN1-95, CN1-80, CN1-85, CN2-41, CN2-90, CN2-03, CN2-55, CN2-101, CN2-67, CN2-105, CN2-49, CN2-39, CN2-66, CN2-69, CN2-93, CN2-87, CN2-30, CN2-79, CN2-62, CN2-51, CN2-18, CN2-37, CN2-92, CN2-97, CN2-77, CN2-32, CN2-75, CN2-70, CN2-50, CN2-95, CN2-27, CN2-84, Nsb160 | 99.3 | <i>Achromobacter spanius</i>           | <i>Betaproteobacteria</i>  | <i>Alcaligenaceae</i>      |
|    | 1  |   |   |   |    | 29 | CN2-17                                                                                                                                                                                                                                                                                                    | 0    | <i>Pigmentiphaga litoralis</i>         | <i>Betaproteobacteria</i>  | <i>Alcaligenaceae</i>      |
|    |    | 1 |   | 1 | 1  | 30 | N-99                                                                                                                                                                                                                                                                                                      | 0    | <i>Achromobacter xylosoxidans</i>      | <i>Betaproteobacteria</i>  | <i>Alcaligenaceae</i>      |
|    |    |   | 8 | 3 | 11 | 31 | Nbs-46, Nbs-74, Nbs-26, Nbs-54, Nbs-77, Nbs-45, Nbs-60, Nbs-96, Nbs171, Nbs112, Nbs170                                                                                                                                                                                                                    | 99.1 | <i>Tetrathibacter kashmirensis</i>     | <i>Betaproteobacteria</i>  |                            |
|    |    |   | 2 | 1 | 3  | 32 | Nbs-20, Nbs-67, Nbs135                                                                                                                                                                                                                                                                                    | 96.2 | <i>Tetrathibacter sp.</i>              | <i>Betaproteobacteria</i>  | <i>Alcaligenaceae</i>      |
|    | 7  |   |   |   |    | 33 | CN2-43, CN2-19, CN2-61, CN2-73, CN2-20, CN2-22, CN2-25                                                                                                                                                                                                                                                    | 99.8 | <i>Diaphorobacter nitroreducens</i>    | <i>Betaproteobacteria</i>  | <i>Comamonadaceae</i>      |
|    | 1  |   | 3 | 9 | 12 | 34 | CN2-47, Nbs-16, Nbs-78, Nbs4, Nbs203, Nbs134, Nbs228, Nbs108, Nbs198, Nbs122, Nbs125, Nbs126, Nbs116                                                                                                                                                                                                      | 0    | <i>Acidovorax defluvii</i>             | <i>Betaproteobacteria</i>  | <i>Comamonadaceae</i>      |
|    |    | 1 |   |   |    | 35 | N-122                                                                                                                                                                                                                                                                                                     | 0    | <i>Acidovorax valerianellae</i>        | <i>Betaproteobacteria</i>  | <i>Comamonadaceae</i>      |
| 10 |    |   |   |   |    | 36 | CN1-66, CN1-22, CN1-100, CN1-35, CN1-62, CN1-21, CN1-32, CN1-75, CN1-20, CN1-67                                                                                                                                                                                                                           | 99.9 | <i>Comamonas composti</i>              | <i>Betaproteobacteria</i>  | <i>Comamonadaceae</i>      |
|    |    | 1 |   |   |    | 37 | N-11                                                                                                                                                                                                                                                                                                      | 0    | <i>Aquicella siphonis</i>              | <i>Gammaproteobacteria</i> | <i>Coxiellaceae</i>        |
|    |    | 1 |   |   |    | 38 | N-18                                                                                                                                                                                                                                                                                                      | 0    | <i>Hydrocarboniphaga effusa</i>        | <i>Gammaproteobacteria</i> | <i>Sinobacteraceae</i>     |
|    |    |   | 1 |   | 1  | 39 | Nbs-95                                                                                                                                                                                                                                                                                                    |      | <i>Hydrocarboniphaga sp.</i>           | <i>Gammaproteobacteria</i> |                            |
|    |    | 4 |   |   |    | 40 | N-209, N-112, N-189, N-12                                                                                                                                                                                                                                                                                 | 99.5 | <i>Rhizobium cellulasilyticum</i>      | <i>Alphaproteobacteria</i> | <i>Rhizobiaceae</i>        |
|    |    | 1 |   |   |    | 41 | N-41                                                                                                                                                                                                                                                                                                      | 0    | <i>Rhizobium radiobacter</i>           | <i>Alphaproteobacteria</i> | <i>Rhizobiaceae</i>        |
| 1  |    |   |   |   |    | 42 | CN1-05                                                                                                                                                                                                                                                                                                    | 0    | <i>Mesorhizobium septentrionale</i>    | <i>Alphaproteobacteria</i> | <i>Phyllobacteriaceae</i>  |
|    |    | 1 |   |   |    | 43 | N-54, N-104                                                                                                                                                                                                                                                                                               | 98.1 | <i>Kaistia adipata</i>                 | <i>Alphaproteobacteria</i> | <i>Rhizobiaceae</i>        |
| 4  |    |   |   |   |    | 44 | CN1-01, CN1-73, CN1-103, CN1-12                                                                                                                                                                                                                                                                           | 99.7 | <i>Devosia insulae</i>                 | <i>Alphaproteobacteria</i> | <i>Hyphomicrobiaceae</i>   |
|    |    | 1 |   |   |    | 45 | N-131                                                                                                                                                                                                                                                                                                     | 0    | <i>Pseudolabrys taiwanensis</i>        | <i>Alphaproteobacteria</i> | <i>Xanthobacteraceae</i>   |
|    | 1  |   |   |   |    | 46 | CN2-14                                                                                                                                                                                                                                                                                                    | 0    | <i>Andersenella baltica</i>            | <i>Alphaproteobacteria</i> | <i>Rhodobiaceae</i>        |
|    |    | 1 | 1 | 1 | 2  | 47 | N-217, Nbs-36, Nbs247                                                                                                                                                                                                                                                                                     | 0    | <i>Sphingomonas yanoikuyae</i>         | <i>Alphaproteobacteria</i> | <i>Sphingobacteriaceae</i> |
|    |    | 1 |   |   |    | 48 | N-73                                                                                                                                                                                                                                                                                                      | 0    | <i>Sphingobium aromaticiconvertens</i> | <i>Alphaproteobacteria</i> | <i>Sphingobacteriaceae</i> |
|    |    | 3 |   |   |    | 49 | N-191, N-66, N-145                                                                                                                                                                                                                                                                                        | 99   | <i>Novosphingobium resinovorum</i>     | <i>Alphaproteobacteria</i> | <i>Sphingobacteriaceae</i> |

|    |   |   |   |   |   |    |                                                                                                                                                                                                                                                                                                           |      |                                       |                       |                                                   |
|----|---|---|---|---|---|----|-----------------------------------------------------------------------------------------------------------------------------------------------------------------------------------------------------------------------------------------------------------------------------------------------------------|------|---------------------------------------|-----------------------|---------------------------------------------------|
|    |   | 2 |   |   |   | 50 | N-29, N-63                                                                                                                                                                                                                                                                                                | 98.3 | <i>Sphingomonas sanxanigenens</i>     | Alphaproteobacteria   | Sphingobacteriaceae                               |
|    |   | 3 |   |   |   | 51 | N-93, N-147, N-51                                                                                                                                                                                                                                                                                         | 99.3 | <i>Brevundimonas aurantiaca</i>       | Alphaproteobacteria   | Caulobacteraceae                                  |
|    |   | 1 |   |   |   | 52 | N-184                                                                                                                                                                                                                                                                                                     | 0    | <i>Phenylobacterium haematophilum</i> | Alphaproteobacteria   | Caulobacteraceae                                  |
|    |   | 1 |   |   |   | 53 | N-102                                                                                                                                                                                                                                                                                                     | 0    | <i>Rhodobacter veldkampii</i>         | Alphaproteobacteria   | Rhodobacteraceae                                  |
|    |   | 1 |   |   |   | 54 | N-188                                                                                                                                                                                                                                                                                                     | 0    | <i>Rhodobacter changlensis</i>        | Alphaproteobacteria   | Rhodobacteraceae                                  |
|    |   | 2 |   |   |   | 55 | N-175, N-80                                                                                                                                                                                                                                                                                               | 99.7 |                                       | Alphaproteobacteria   | <i>Incertae sedis</i> (no assigned to any family) |
| 35 | 1 |   |   |   |   | 56 | CN1-11, CN1-16, CN1-39, CN1-26, CN1-63, CN1-54, CN1-107, CN1-41, CN1-43, CN1-60, CN1-44, CN1-70, CN1-98, CN1-58, CN1-25, CN1-29, CN1-51, CN1-53, CN1-76, CN1-42, CN1-47, CN1-109, CN1-85, CN1-48, CN1-102, CN1-33, CN1-18, CN1-06, CN1-96, CN1-08, CN1-53, CN1-23, CN1-69, CN1-56, CN1-03, CN1-28, CN2-53 | 99.2 | <i>Azospirillum oryzae</i>            | Alphaproteobacteria   | Rhodospirillaceae                                 |
| 7  |   |   |   |   |   | 57 | CN1-38, CN1-61, CN1-90, CN1-65, CN1-71, CN1-04, CN1-74                                                                                                                                                                                                                                                    | 99.2 | Uncultured <i>alpha</i>               | Alphaproteobacteria   | Uncultured <i>alpha</i>                           |
| 1  |   |   |   |   |   | 58 | CN1-93                                                                                                                                                                                                                                                                                                    | 0    | <i>Caedibacter caryophilus</i>        | Alphaproteobacteria   | Thiotrichales                                     |
|    |   | 1 |   |   |   | 59 | N-08                                                                                                                                                                                                                                                                                                      | 0    | <i>Sinorickettsia chlamys</i>         | Alphaproteobacteria   | Uncultured <i>alpha</i>                           |
|    | 1 |   |   |   |   | 60 | CN2-04                                                                                                                                                                                                                                                                                                    | 0    | Endosymbiont <i>Acanthamoeba</i>      | Alphaproteobacteria   | Uncultured <i>alpha</i>                           |
|    |   |   | 2 |   | 2 | 61 | Nbs-40, Nbs-35                                                                                                                                                                                                                                                                                            | 99.8 | Uncultured <i>alpha</i>               | Alphaproteobacteria   | Uncultured <i>alpha</i>                           |
|    |   | 1 |   |   |   | 62 | N-161                                                                                                                                                                                                                                                                                                     | 0    | <i>Roseomonas terrae</i>              | Alphaproteobacteria   | Rhodobacteraceae                                  |
|    |   | 1 |   |   |   | 63 | N-58                                                                                                                                                                                                                                                                                                      | 0    | <i>Arcobacter mytili</i>              | Epsilonproteobacteria | Campylobacteraceae                                |
|    |   | 1 | 1 | 2 | 3 | 64 | N-207, Nbs87, Nbs191, Nbs131                                                                                                                                                                                                                                                                              | 0    | <i>Delsulfocapsa thiozymogenes</i>    | Deltaproteobacteria   | Desulfobulbaceae                                  |
|    |   | 1 |   | 1 | 1 | 65 | N-206                                                                                                                                                                                                                                                                                                     | 0    | <i>Geobacter thiogenes</i>            | Deltaproteobacteria   | Geobacteraceae                                    |
|    |   |   | 2 | 3 | 5 | 66 | Nbs-28, Nbs-32, Nbs199, Nbs154, Nbs225                                                                                                                                                                                                                                                                    | 99   | <i>Soehngenia saccharolytica</i>      | Firmicutes            | Clostridiales                                     |
|    |   |   | 3 | 3 | 6 | 67 | Nbs-13, Nbs-85, Nbs-29, Nbs156, Nbs109, Nbs263                                                                                                                                                                                                                                                            | 97.6 | <i>Sedimentibacter saalensis</i>      | Firmicutes            | Clostridiales                                     |
|    |   | 1 |   |   |   | 68 | N-83                                                                                                                                                                                                                                                                                                      | 0    | <i>Parvimonas micra</i>               | Firmicutes            | <i>Incertae sedis</i> (no assigned to any family) |
|    |   |   | 1 |   | 1 | 69 | Nbs-23                                                                                                                                                                                                                                                                                                    | 0    | Uncultured Firmicutes                 | Firmicutes            | Uncultured Firmicutes                             |
|    |   |   | 2 |   | 2 | 70 | Nbs-58, Nbs-91                                                                                                                                                                                                                                                                                            | 100  | Uncultured Firmicutes                 | Firmicutes            | Uncultured Firmicutes                             |

|   |   |   |    |    |    |    |                                                                                                                                                                                                                                                                                                       |      |                                               |                        |                                     |
|---|---|---|----|----|----|----|-------------------------------------------------------------------------------------------------------------------------------------------------------------------------------------------------------------------------------------------------------------------------------------------------------|------|-----------------------------------------------|------------------------|-------------------------------------|
|   |   | 9 |    |    |    | 71 | N-30, N-38, N-48, N-14, N-157, N-85, N-78, N-76, N-127                                                                                                                                                                                                                                                | 99.6 | <i>Haloplasma contractile</i>                 | <i>Tenericutes</i>     | <i>Haloplasmataceae</i>             |
|   |   | 1 |    |    |    | 72 | N-124                                                                                                                                                                                                                                                                                                 | 0    | <i>Streptococcus sanguinis</i>                | <i>Firmicutes</i>      | <i>Streptococcaceae</i>             |
|   |   |   | 1  |    |    | 73 | Nsb-56                                                                                                                                                                                                                                                                                                | 0    | Uncultured<br><i>Actinobacteria</i>           | <i>Actinobacteria</i>  | Uncultured<br><i>Actinobacteria</i> |
|   |   |   | 1  |    | 1  | 74 | Nsb-82                                                                                                                                                                                                                                                                                                | 0    | Uncultured<br><i>Actinobacteria</i>           | <i>Actinobacteria</i>  | Uncultured<br><i>Actinobacteria</i> |
| 1 |   |   |    |    |    | 75 | CN1-27                                                                                                                                                                                                                                                                                                | 0    | <i>Microbacterium oxydans</i>                 | <i>Actinobacteria</i>  | <i>Microbacteriaceae</i>            |
|   |   | 1 |    |    |    | 76 | N-31                                                                                                                                                                                                                                                                                                  | 0    | <i>Microbacterium invictum</i>                | <i>Actinobacteria</i>  | <i>Microbacteriaceae</i>            |
|   |   |   | 15 | 24 | 39 | 77 | Nbs-10, Nbs-92, Nbs-6, Nbs-65, Nbs-72, Nbs-94, Nbs-83, Nbs-41, Nbs-57, Nbs-38, Nbs-68, Nbs-66, Nbs-06, Nbs-43, Nbs-34, Nbs155, Nbs102, Nbs215, Nbs149, Nbs113, Nbs274, Nbs128, Nbs121, Nbs141, Nbs130, Nbs133, Nbs229, Nbs206, Nbs249, Nbs137, Nbs162, Nbs172, Nbs265, Nbs169, Nbs181, Nbs250, Nbs138 | 97.1 | <i>Proteiniphilum acetatigenes</i>            | <i>Bacteroidetes</i>   | <i>Porphyromonadaceae</i>           |
|   |   |   | 1  |    | 1  | 78 | Nbs-42                                                                                                                                                                                                                                                                                                | 0    | <i>Parabacteroides goldsteinii</i>            | <i>Bacteroidetes</i>   | <i>Porphyromonadaceae</i>           |
|   |   |   | 2  | 2  | 4  | 79 | Nsb-37, Nsb-81, Nbs178, Nbs144                                                                                                                                                                                                                                                                        |      | Uncultured<br><i>Bacteroidetes</i>            | <i>Bacteroidetes</i>   | Uncultured<br><i>Bacteroidetes</i>  |
|   | 2 | 1 |    |    |    | 80 | CN2-94, CN2-45, N-45                                                                                                                                                                                                                                                                                  | 99.8 | <i>Mucilaginibacter oryzae</i>                | <i>Bacteroidetes</i>   | <i>Sphingobacteriaceae</i>          |
|   |   | 1 |    |    |    | 81 | N-106                                                                                                                                                                                                                                                                                                 | 0    | <i>Nubsella zeaxanthinifaciens</i>            | <i>Bacteroidetes</i>   | <i>Sphingobacteriaceae</i>          |
|   |   | 2 |    |    |    | 82 | N-138, N-192                                                                                                                                                                                                                                                                                          | 99.1 | <i>Olivibacter soli</i>                       | <i>Bacteroidetes</i>   | <i>Sphingobacteriaceae</i>          |
| 2 |   |   |    |    |    | 83 | CN1-36, CN1-37                                                                                                                                                                                                                                                                                        | 99.7 | <i>Terrimonas ferruginea</i>                  | <i>Bacteroidetes</i>   | <i>Chitinophagaceae</i>             |
|   |   | 1 |    |    |    | 84 | N-155                                                                                                                                                                                                                                                                                                 | 0    |                                               | <i>Cyanobacteria</i>   | <i>Chloroplast</i>                  |
|   |   |   | 4  | 2  | 6  | 85 | Nbs-8, Nbs-9, Nbs-52, Nbs-1, Nbs234, Nbs188                                                                                                                                                                                                                                                           | 95   | Uncultured<br><i>Chloroflexi</i>              | <i>Chloroflexi</i>     | Uncultured <i>Chloroflexi</i>       |
|   |   |   | 1  |    | 1  | 86 | Nbs-39                                                                                                                                                                                                                                                                                                | 0    | Uncultured<br><i>Spirochaeta</i>              | <i>Spirochaetae</i>    | Uncultured <i>Spirochaetae</i>      |
|   |   | 1 |    |    |    | 87 | N-125                                                                                                                                                                                                                                                                                                 | 0    | <i>Luteolibacter pohnpeiensis</i>             | <i>Verrucomicrobia</i> | <i>Verrucomicrobiaceae</i>          |
|   |   |   | 1  |    | 1  | 88 | Nbs-47                                                                                                                                                                                                                                                                                                | 0    | <i>Candidatus Xiphinematobacter americani</i> | <i>Verrucomicrobia</i> | <i>Verrucomicrobiaceae</i>          |
|   |   | 1 |    |    |    | 89 | N-134                                                                                                                                                                                                                                                                                                 | 0    | <i>Opitutus terrae</i>                        | <i>Verrucomicrobia</i> | <i>Opitutaceae</i>                  |
| 2 |   |   |    |    |    | 90 | CN1-13, CN1-57                                                                                                                                                                                                                                                                                        | 99.9 | <i>Singulisphaera acidiphila</i>              | <i>Planctomycetes</i>  | <i>Planctomycetaceae</i>            |
|   |   | 1 |    |    |    | 91 | N-135                                                                                                                                                                                                                                                                                                 | 0    | <i>Singulisphaera acidiphila</i>              | <i>Planctomycetes</i>  | <i>Planctomycetaceae</i>            |

|   |  |   |   |   |     |                                |      |                                    |                              |                            |
|---|--|---|---|---|-----|--------------------------------|------|------------------------------------|------------------------------|----------------------------|
| 3 |  |   |   |   | 92  | CN1-46, CN1-105, CN1-99        | 99.5 | <i>Planctomycetes maris</i>        | <i>Planctomycetes</i>        | <i>Planctomycetaceae</i>   |
|   |  |   | 1 |   | 93  | Nbs-80                         | 0    | Uncultured candidate division OP8  | Candidate division OP8       | Candidate division OP8     |
|   |  | 1 |   |   | 94  | N-202                          | 0    | <i>Verrucomicrobium spinosum</i>   | <i>Verrucomicrobia</i>       | <i>Verrucomicrobiaceae</i> |
|   |  | 1 |   |   | 95  | N-06                           | 0    | <i>Proteiniphilum acetatigenes</i> | <i>Bacteroidetes</i>         | <i>Porphyromonadaceae</i>  |
|   |  |   | 1 | 1 | 96  | Nbs132                         | 0    | <i>Pseudomonas</i> sp.             | <i>Gammaproteobacteria</i>   | <i>Pseudomonadaceae</i>    |
|   |  |   | 1 | 1 | 97  | Nbs117                         | 0    | <i>Pseudomonas</i> sp.             | <i>Gammaproteobacteria</i>   | <i>Pseudomonadaceae</i>    |
|   |  |   | 2 | 2 | 98  | Nbs266, Nbs175                 | 99.7 | <i>Alkanivorax</i> sp.             | <i>Gammaproteobacteria</i>   | <i>Alkanivoraceae</i>      |
|   |  |   | 2 | 2 | 99  | Nbs182, Nbs197                 | 98   | <i>Diaphorobacter</i> sp.          | <i>Betaproteobacteria</i>    | <i>Comamonadaceae</i>      |
|   |  |   | 4 | 4 | 100 | Nbs267, Nbs164, Nbs244, Nbs146 | 97.9 | <i>Brevundimonas</i> sp.           | <i>Betaproteobacteria</i>    | <i>Caulobacteraceae</i>    |
|   |  |   | 1 | 1 | 101 | Nbs119                         | 0    | <i>Sphingomonas</i> sp.            | <i>Alphaproteobacteria</i>   | <i>Sphingomonadaceae</i>   |
|   |  |   | 1 | 1 | 102 | Nbs192                         | 0    | Uncultured <i>alpha</i>            | <i>Alphaproteobacteria</i>   |                            |
|   |  |   | 1 | 1 | 103 | Nbs200                         | 0    | Uncultured <i>epsilon</i>          | <i>Epsilonproteobacteria</i> |                            |
|   |  |   | 1 | 1 | 104 | Nbs187                         | 0    | <i>Acholeplasma</i> sp.            | <i>Tenericutes</i>           | <i>Acholeplasmataceae</i>  |
|   |  |   | 1 | 1 | 105 | Nbs246                         | 0    | <i>Actinotalea</i> sp.             | <i>Actinobacteria</i>        | <i>Cellulomonadaceae</i>   |
|   |  |   | 1 | 1 | 106 | Nbs127                         | 0    | <i>Georgenia</i> sp.               | <i>Actinobacteria</i>        | <i>Bogoriellaceae</i>      |
|   |  |   | 1 | 1 | 107 | Nbs258                         | 0    | <i>Arcanobacterium</i> sp.         | <i>Actinobacteria</i>        | <i>Actinomycetaceae</i>    |
|   |  |   | 1 | 1 | 108 | Nbs211                         | 0    | Uncultured <i>Actinobacteria</i>   | <i>Actinobacteria</i>        |                            |
|   |  |   | 4 | 4 | 109 | Nbs148, Nbs259, Nbs220, Nbs248 | 95   | <i>Desulosforosinus</i> sp.        | <i>Firmicutes</i>            | <i>Peptococcaceae</i>      |
|   |  |   | 4 | 4 | 110 | Nbs143, Nbs190, Nbs276, Nbs257 | 95.4 | <i>Sedimentibacter saalensis</i>   | <i>Firmicutes</i>            | <i>Clostridiales</i>       |
|   |  |   | 2 | 2 | 111 | Nbs237, Nbs153                 | 95.2 | <i>Anaerovorax</i> sp.             | <i>Firmicutes</i>            | <i>Clostridiales</i>       |
|   |  |   | 1 | 1 | 112 | Nbs255                         | 0    | <i>Fusibacter</i> sp.              | <i>Firmicutes</i>            | <i>Clostridiales</i>       |
|   |  |   | 2 | 2 | 113 | Nbs124, Nbs189                 | 100  | Uncultured <i>clostridiales</i>    | <i>Firmicutes</i>            | <i>Clostridiales</i>       |
|   |  |   | 3 | 3 | 114 | Nbs129, Nbs273, Nbs213         | 93   | Uncultured <i>clostridiales</i>    | <i>Firmicutes</i>            | <i>Clostridiales</i>       |
|   |  |   | 1 | 1 | 115 | Nbs227                         | 0    | Uncultured <i>clostridiales</i>    | <i>Firmicutes</i>            | <i>Clostridiales</i>       |
|   |  |   | 2 | 2 | 116 | Nbs103, Nbs268                 | 98.8 | Uncultured <i>Bacteroidetes</i>    | <i>Bacteroidetes</i>         |                            |
|   |  |   | 1 | 1 | 117 | Nbs180                         | 0    | Uncultured <i>Bacteroidetes</i>    | <i>Bacteroidetes</i>         |                            |
|   |  |   | 1 | 1 | 118 | Nbs167                         | 0    | <i>Dysgonomonas</i> sp.            | <i>Bacteroidetes</i>         | <i>Porphyromonadaceae</i>  |
|   |  |   | 1 | 1 | 119 | Nbs196                         | 0    | Uncultured Candidate division TM7  | Candidate division TM7       |                            |
|   |  |   | 1 | 1 | 120 | Nbs161                         | 0    | Uncultured                         | <i>Firmicutes</i>            |                            |

|  |  |  |  |   |   |     |        |   |                                     |                             |  |
|--|--|--|--|---|---|-----|--------|---|-------------------------------------|-----------------------------|--|
|  |  |  |  |   |   |     |        |   | <i>bacterium</i>                    |                             |  |
|  |  |  |  | 1 | 1 | 121 | Nbs235 | 0 | Uncultured<br><i>syntrophomonas</i> | <i>Firmicutes</i>           |  |
|  |  |  |  | 1 | 1 | 122 | Nbs142 | 0 | Uncultured<br><i>Chloroflexi</i>    | <i>Chloroflexi</i>          |  |
|  |  |  |  | 1 | 1 | 123 | Nbs111 | 0 | Uncultured<br><i>bacterium</i>      | Uncultured <i>bacteria</i>  |  |
|  |  |  |  | 1 | 1 | 124 | Nbs184 | 0 | Uncultured<br><i>bacterium</i>      | Candidate division<br>WCHB1 |  |

<sup>1</sup>The Table provides the analysis of 670 16S rDNA sequences (N: 212; Nbs: 261 (86 clones + 175 454-partial sequences); CN1: 90; CN2: 107). Clones were grouped based on their affiliation to different operational phylogenetic units (OPUs) as described in the **Supplementary Materials and Methods**. We considered an OPU to be represented by each single group of clones that formed an independent clade in the tree without considering a similarity cut-off value.

<sup>2</sup>Phylogenetic inference of the 16S RNA gene sequences was performed as described in **Supplementary Materials and Methods**; closest related specie (and sequence identity) associated to the sequence of interest is specifically shown.

**Table S3** General features of the metagenomes of the four soil-derived communities that were examined\*

|                                | Sample  |          |          |          |
|--------------------------------|---------|----------|----------|----------|
|                                | N       | Nbs      | CN1      | CN2      |
| Contigs                        | 4335    | 16032    | 20809    | 9915     |
| Total bps                      | 2599359 | 17925186 | 20031687 | 13002964 |
| Average contig size (bps)      | 599     | 1118     | 962      | 1311     |
| Average GC content (%)         | 61.03   | 53.36    | 57.19    | 63.68    |
| ncRNAs                         | 14      | 50       | 20       | 55       |
| rRNAs                          | 41      | 85       | 79       | 20       |
| tRNAs                          | 39      | 208      | 170      | 141      |
| Total RNAs                     | 94      | 343      | 269      | 216      |
| ORFs (at least 50 amino acids) | 5211    | 21130    | 27124    | 18391    |
| Average ORF size (bps)         | 405     | 631      | 566      | 632      |
| ORFs with predicted function   | 4776    | 19867    | 25037    | 16527    |
| Hypothetical                   | 435     | 1891     | 2087     | 1864     |
| Assigned to COGs               | 4630    | 19243    | 24322    | 15779    |
| Different COGs                 | 2089    | 2746     | 3961     | 3454     |
| Average COG size               | 2.8     | 7.5      | 7.8      | 5.8      |
| KEGG                           | 1538    | 2751     | 2775     | 2507     |

\*We isolated the microbial DNA, directly pyro-sequenced using a Roche GS FLX DNA sequencer, and produced sequences from which potential protein-coding genes ( $\geq 20$  amino acids) and functional assignments was made on the basis of BLASTP analysis against reference dataset for “Clusters of Orthologous Groups (COG)” and “Kyoto Encyclopedia of Genes and Genomes (KEGG)” assignments. Full details for metagenomic setup (sequencing, assembly and gene prediction) are available in the **Supplementary Materials and Methods**.

**Table S4** Enrichment in COG functional classes by meaning of Z-scores (A) and percentage of genes belonging to enriched COGs (B)

(A) Pair-pair COG comparison by meaning of z-scores

| Enriched in <first set> compared with <second set> | Z-score of significance <sup>1</sup> | Class <sup>2</sup>                                                                                           | Confidence <sup>1</sup> | Instances in set 1 <sup>3</sup> | Instances in set 2 <sup>3</sup> |
|----------------------------------------------------|--------------------------------------|--------------------------------------------------------------------------------------------------------------|-------------------------|---------------------------------|---------------------------------|
| Nbs-CN1                                            | 6.13                                 | COG3436L:Transposase and inactivated derivatives                                                             | 0.99                    | 54                              | 19                              |
| Nbs-CN1                                            | 4.831                                | COG3039L:Transposase and inactivated derivatives, IS5 family                                                 | 0.99                    | 27                              | 7                               |
| Nbs-CN1                                            | 4.77                                 | COG1373R:Predicted ATPase (AAA+ superfamily)                                                                 | 0.99                    | 28                              | 8                               |
| Nbs-CN1                                            | 4.169                                | COG0553KL:Superfamily II DNA/RNA helicases, SNF2 family                                                      | 0.99                    | 36                              | 18                              |
| Nbs-CN1                                            | 4.02                                 | COG3250G:Beta-galactosidase/beta-glucuronidase                                                               | 0.99                    | 28                              | 12                              |
| Nbs-CN1                                            | 3.972                                | COG0610V:Type I site-specific restriction-modification system, R (restriction) subunit and related helicases | 0.99                    | 24                              | 9                               |
| Nbs-CN1                                            | 3.493                                | COG1002V:Type II restriction enzyme, methylase subunits                                                      | 0.95                    | 16                              | 5                               |
| Nbs-CN1                                            | 3.477                                | COG2963L:Transposase and inactivated derivatives                                                             | 0.99                    | 32                              | 19                              |
| Nbs-CN1                                            | 3.424                                | COG0286V:Type I restriction-modification system methyltransferase subunit                                    | 0.99                    | 23                              | 11                              |
| Nbs-CN1                                            | 3.372                                | COG0334E:Glutamate dehydrogenase/leucine dehydrogenase                                                       | 0.95                    | 14                              | 4                               |
| Nbs-CN1                                            | 3.341                                | COG3464L:Transposase and inactivated derivatives                                                             | 0.99                    | 19                              | 8                               |
| Nbs-CN1                                            | 3.3                                  | COG2826L:Transposase and inactivated derivatives, IS30 family                                                | 0.95                    | 15                              | 5                               |
| Nbs-CN1                                            | 3.197                                | COG3507G:Beta-xylosidase                                                                                     | 0.99                    | 17                              | 7                               |
| Nbs-CN1                                            | 3.13                                 | COG0732V:Restriction endonuclease S subunits                                                                 | 0.99                    | 19                              | 9                               |
| Nbs-CN1                                            | 3.13                                 | COG3547L:Transposase and inactivated derivatives                                                             | 0.99                    | 19                              | 9                               |
| Nbs-CN1                                            | 3.046                                | COG0668M:Small-conductance mechanosensitive channel                                                          | 0.95                    | 15                              | 6                               |
| Nbs-CN1                                            | 3.005                                | COG3177S:Uncharacterized conserved protein                                                                   | 0.99                    | 16                              | 7                               |
| Nbs-CN1                                            | 2.947                                | COG0643NT:Chemotaxis protein histidine kinase and related kinases                                            | 0.99                    | 18                              | 9                               |
| Nbs-CN1                                            | 2.888                                | COG0789K:Predicted transcriptional regulators                                                                | 0.99                    | 27                              | 18                              |
| Nbs-CN1                                            | 2.858                                | COG0582L:Integrase                                                                                           | 0.99                    | 46                              | 39                              |
| Nbs-CN1                                            | 2.732                                | COG0793M:Periplasmic protease                                                                                | 0.99                    | 26                              | 18                              |
| Nbs-CN1                                            | 2.72                                 | COG4584L:Transposase and inactivated derivatives                                                             | 0.99                    | 23                              | 15                              |
| Nbs-CN1                                            | 2.669                                | COG1479S:Uncharacterized conserved protein                                                                   | 0.95                    | 12                              | 5                               |



|         |       |                                                                                       |      |    |    |
|---------|-------|---------------------------------------------------------------------------------------|------|----|----|
| Nbs-CN1 | 2.669 | COG4206H:Outer membrane cobalamin receptor protein                                    | 0.95 | 12 | 5  |
| Nbs-CN1 | 2.628 | COG0348C:Polyferredoxin                                                               | 0.95 | 13 | 6  |
| Nbs-CN1 | 2.628 | COG0084L:Mg-dependent DNase                                                           | 0.95 | 13 | 6  |
| Nbs-CN1 | 2.598 | COG1092R:Predicted SAM-dependent methyltransferases                                   | 0.99 | 14 | 7  |
| Nbs-CN1 | 2.564 | COG0776L:Bacterial nucleoid DNA-binding protein                                       | 0.95 | 24 | 17 |
| Nbs-CN1 | 2.544 | COG0515RTKL:Serine/threonine protein kinase                                           | 0.95 | 20 | 13 |
| Nbs-CN1 | 2.494 | COG2801L:Transposase and inactivated derivatives                                      | 0.95 | 57 | 56 |
| Nbs-CN1 | 2.487 | COG0569P:K+ transport systems, NAD-binding component                                  | 0.95 | 10 | 4  |
| Nbs-CN1 | 2.383 | COG4147R:Predicted symporter                                                          | 0.95 | 13 | 7  |
| Nbs-CN1 | 2.377 | COG1484L:DNA replication protein                                                      | 0.95 | 21 | 15 |
| Nbs-CN1 | 2.362 | COG0543HC:2-polyprenylphenol hydroxylase and related flavodoxin oxidoreductases       | 0.95 | 19 | 13 |
| Nbs-CN1 | 2.359 | COG0826O:Collagenase and related proteases                                            | 0.95 | 15 | 9  |
| Nbs-CN1 | 2.355 | COG0057G:Glyceraldehyde-3-phosphate dehydrogenase/erythrose-4-phosphate dehydrogenase | 0.95 | 16 | 10 |
| Nbs-CN1 | 2.234 | COG1826U:Sec-independent protein secretion pathway components                         | 0.95 | 9  | 4  |
| Nbs-CN1 | 2.2   | COG0366G:Glycosidases                                                                 | 0.95 | 20 | 15 |
| Nbs-CN1 | 2.196 | COG0798P:Arsenite efflux pump ACR3 and related permeases                              | 0.95 | 10 | 5  |
| Nbs-CN1 | 2.196 | COG1974KT:SOS-response transcriptional repressors (RecA-mediated autopeptidases)      | 0.95 | 10 | 5  |
| Nbs-CN1 | 2.196 | COG0082E:Chorismate synthase                                                          | 0.95 | 10 | 5  |
| Nbs-CN1 | 2.196 | COG1555L:DNA uptake protein and related DNA-binding proteins                          | 0.95 | 10 | 5  |
| Nbs-CN1 | 2.158 | COG2890J:Methylase of polypeptide chain release factors                               | 0.95 | 12 | 7  |
| Nbs-CN1 | 2.155 | COG0784T:FOG: CheY-like receiver                                                      | 0.95 | 37 | 35 |
| Nbs-CN1 | 2.152 | COG0635H:Coproporphyrinogen III oxidase and related Fe-S oxidoreductases              | 0.95 | 15 | 10 |
| Nbs-CN1 | 2.149 | COG3335L:Transposase and inactivated derivatives                                      | 0.95 | 14 | 9  |
| Nbs-CN1 | 2.149 | COG0534V:Na+-driven multidrug efflux pump                                             | 0.95 | 14 | 9  |
| Nbs-CN1 | 2.149 | COG0835NT:Chemotaxis signal transduction protein                                      | 0.95 | 14 | 9  |
| Nbs-CN1 | 2.074 | COG0494LR:NTP pyrophosphohydrolases including oxidative damage repair enzymes         | 0.95 | 22 | 18 |
| Nbs-CN1 | 1.964 | COG4942D:Membrane-bound metallopeptidase                                              | 0.95 | 8  | 4  |
| Nbs-CN1 | 1.964 | COG0503F:Adenine/guanine phosphoribosyltransferases and related PRPP-binding proteins | 0.95 | 8  | 4  |
| Nbs-CN1 | 1.964 | COG1066O:Predicted ATP-dependent serine protease                                      | 0.95 | 8  | 4  |
| Nbs-CN1 | 1.964 | COG0763M:Lipid A disaccharide synthetase                                              | 0.95 | 8  | 4  |
| Nbs-CN1 | 1.964 | COG0005F:Purine nucleoside phosphorylase                                              | 0.95 | 8  | 4  |
| Nbs-CN1 | 1.964 | COG0392S:Predicted integral membrane protein                                          | 0.95 | 8  | 4  |
| Nbs-CN1 | 1.964 | COG1825J:Ribosomal protein L25 (general stress protein Ctc)                           | 0.95 | 8  | 4  |
|         |       |                                                                                       |      |    |    |

|         |       |                                                                                                              |      |     |     |
|---------|-------|--------------------------------------------------------------------------------------------------------------|------|-----|-----|
| Nbs-CN2 | 5.788 | COG3436L:Transposase and inactivated derivatives                                                             | 0.99 | 54  | 10  |
| Nbs-CN2 | 5.071 | COG0673R:Predicted dehydrogenases and related proteins                                                       | 0.95 | 36  | 5   |
| Nbs-CN2 | 3.083 | COG0793M:Periplasmic protease                                                                                | 0.99 | 26  | 9   |
| Nbs-CN2 | 3.031 | COG3464L:Transposase and inactivated derivatives                                                             | 0.95 | 19  | 5   |
| Nbs-CN2 | 2.999 | COG3507G:Beta-xylosidase                                                                                     | 0.95 | 17  | 4   |
| Nbs-CN2 | 2.833 | COG0209F:Ribonucleotide reductase, alpha subunit                                                             | 0.99 | 21  | 7   |
| Nbs-CN2 | 2.814 | COG0610V:Type I site-specific restriction-modification system, R (restriction) subunit and related helicases | 0.99 | 24  | 9   |
| Nbs-CN2 | 2.678 | COG0826O:Collagenase and related proteases                                                                   | 0.95 | 15  | 4   |
| Nbs-CN2 | 2.562 | COG3177S:Uncharacterized conserved protein                                                                   | 0.95 | 16  | 5   |
| Nbs-CN2 | 2.466 | COG0286V:Type I restriction-modification system methyltransferase subunit                                    | 0.95 | 23  | 10  |
| Nbs-CN2 | 2.328 | COG4775M:Outer membrane protein/protective antigen OMA87                                                     | 0.95 | 13  | 4   |
| Nbs-CN2 | 2.328 | COG1752R:Predicted esterase of the alpha-beta hydrolase superfamily                                          | 0.95 | 13  | 4   |
| Nbs-CN2 | 2.3   | COG3547L:Transposase and inactivated derivatives                                                             | 0.95 | 19  | 8   |
| Nbs-CN2 | 2.3   | COG1136V:ABC-type antimicrobial peptide transport system, ATPase component                                   | 0.95 | 19  | 8   |
| Nbs-CN2 | 2.232 | COG0366G:Glycosidases                                                                                        | 0.95 | 20  | 9   |
| Nbs-CN2 | 2.172 | COG1484L:DNA replication protein                                                                             | 0.95 | 21  | 10  |
| Nbs-CN2 | 2.141 | COG0249L:Mismatch repair ATPase (MutS family)                                                                | 0.95 | 12  | 4   |
| Nbs-CN2 | 2.141 | COG4206H:Outer membrane cobalamin receptor protein                                                           | 0.95 | 12  | 4   |
| Nbs-CN2 | 2.141 | COG0060J:Isoleucyl-tRNA synthetase                                                                           | 0.95 | 12  | 4   |
| Nbs-CN2 | 2.141 | COG0156H:7-keto-8-aminopelargonate synthetase and related enzymes                                            | 0.95 | 12  | 4   |
| Nbs-CN2 | 2.12  | COG1131V:ABC-type multidrug transport system, ATPase component                                               | 0.95 | 26  | 14  |
| Nbs-CN2 | 2.076 | COG0050J:GTPases - translation elongation factors                                                            | 0.95 | 19  | 9   |
| Nbs-CN2 | 2.022 | COG0776L:Bacterial nucleoid DNA-binding protein                                                              | 0.95 | 24  | 13  |
|         |       |                                                                                                              |      |     |     |
| Nbs-N   | 2.117 | COG0673R:Predicted dehydrogenases and related proteins                                                       | 0.95 | 36  | 4   |
| Nbs-N   | 2.104 | COG3436L:Transposase and inactivated derivatives                                                             | 0.95 | 54  | 8   |
|         |       |                                                                                                              |      |     |     |
| CN1-Nbs | 5.308 | COG3181S:Uncharacterized protein conserved in bacteria                                                       | 0.99 | 143 | 35  |
| CN1-Nbs | 5.277 | COG0583K:Transcriptional regulator                                                                           | 0.99 | 285 | 100 |
| CN1-Nbs | 4.859 | COG1629P:Outer membrane receptor proteins, mostly Fe transport                                               | 0.99 | 215 | 72  |
| CN1-Nbs | 4.554 | COG0747E:ABC-type dipeptide transport system, periplasmic component                                          | 0.95 | 50  | 5   |
| CN1-Nbs | 4.223 | COG0683E:ABC-type branched-chain amino acid transport systems, periplasmic component                         | 0.99 | 109 | 30  |
| CN1-Nbs | 4.146 | COG0765E:ABC-type amino acid transport system, permease component                                            | 0.95 | 41  | 4   |
| CN1-Nbs | 4.105 | COG2197TK:Response regulator containing a CheY-like receiver domain and an HTH DNA-binding domain            | 0.99 | 76  | 17  |

|         |       |                                                                                                                                                      |      |     |    |
|---------|-------|------------------------------------------------------------------------------------------------------------------------------------------------------|------|-----|----|
| CN1-Nbs | 3.643 | COG1012C:NAD-dependent aldehyde dehydrogenases                                                                                                       | 0.99 | 120 | 40 |
| CN1-Nbs | 3.339 | COG1167KE:Transcriptional regulators containing a DNA-binding HTH domain and an aminotransferase domain (MocR family) and their eukaryotic orthologs | 0.99 | 42  | 8  |
| CN1-Nbs | 3.331 | COG0559E:Branched-chain amino acid ABC-type transport system, permease components                                                                    | 0.99 | 64  | 17 |
| CN1-Nbs | 3.287 | COG1609K:Transcriptional regulators                                                                                                                  | 0.99 | 49  | 11 |
| CN1-Nbs | 3.265 | COG0596R:Predicted hydrolases or acyltransferases (alpha/beta hydrolase superfamily)                                                                 | 0.99 | 94  | 31 |
| CN1-Nbs | 3.259 | COG3279KT:Response regulator of the LytR/AlgR family                                                                                                 | 0.99 | 41  | 8  |
| CN1-Nbs | 3.229 | COG1802K:Transcriptional regulators                                                                                                                  | 0.99 | 38  | 7  |
| CN1-Nbs | 3.1   | COG1804C:Predicted acyl-CoA transferases/carnitine dehydratase                                                                                       | 0.99 | 49  | 12 |
| CN1-Nbs | 3.027 | COG1020Q:Non-ribosomal peptide synthetase modules and related proteins                                                                               | 0.95 | 33  | 6  |
| CN1-Nbs | 2.979 | COG0697GER:Permeases of the drug/metabolite transporter (DMT) superfamily                                                                            | 0.99 | 59  | 17 |
| CN1-Nbs | 2.937 | COG0531E:Amino acid transporters                                                                                                                     | 0.95 | 32  | 6  |
| CN1-Nbs | 2.908 | COG0601EP:ABC-type dipeptide/oligopeptide/nickel transport systems, permease components                                                              | 0.95 | 29  | 5  |
| CN1-Nbs | 2.908 | COG4948MR:L-alanine-DL-glutamate epimerase and related enzymes of enolase superfamily                                                                | 0.95 | 29  | 5  |
| CN1-Nbs | 2.791 | COG0154J:Asp-tRNA <sup>Asn</sup> /Glu-tRNA <sup>Gln</sup> amidotransferase A subunit and related amidases                                            | 0.99 | 33  | 7  |
| CN1-Nbs | 2.786 | COG0308E:Aminopeptidase N                                                                                                                            | 0.95 | 25  | 4  |
| CN1-Nbs | 2.751 | COG1335Q:Amidases related to nicotinamidase                                                                                                          | 0.95 | 30  | 6  |
| CN1-Nbs | 2.735 | COG4177E:ABC-type branched-chain amino acid transport system, permease component                                                                     | 0.99 | 49  | 14 |
| CN1-Nbs | 2.681 | COG0841V:Cation/multidrug efflux pump                                                                                                                | 0.99 | 122 | 50 |
| CN1-Nbs | 2.661 | COG2207K:AraC-type DNA-binding domain-containing proteins                                                                                            | 0.99 | 80  | 29 |
| CN1-Nbs | 2.655 | COG0179Q:2-keto-4-pentenoate hydratase/2-oxohepta-3-ene-1,7-dioic acid hydratase (catechol pathway)                                                  | 0.99 | 34  | 8  |
| CN1-Nbs | 2.598 | COG0318IQ:Acyl-CoA synthetases (AMP-forming)/AMP-acid ligases II                                                                                     | 0.99 | 77  | 28 |
| CN1-Nbs | 2.579 | COG1304C:L-lactate dehydrogenase (FMN-dependent) and related alpha-hydroxy acid dehydrogenases                                                       | 0.95 | 23  | 4  |
| CN1-Nbs | 2.558 | COG0624E:Acetylornithine deacetylase/Succinyl-diaminopimelate desuccinylase and related deacylases                                                   | 0.95 | 49  | 15 |
| CN1-Nbs | 2.541 | COG0183I:Acetyl-CoA acetyltransferase                                                                                                                | 0.95 | 70  | 25 |
| CN1-Nbs | 2.477 | COG0665E:Glycine/D-amino acid oxidases (deaminating)                                                                                                 | 0.95 | 48  | 15 |
| CN1-Nbs | 2.471 | COG0843C:Heme/copper-type cytochrome/quinol oxidases, subunit 1                                                                                      | 0.95 | 22  | 4  |
| CN1-Nbs | 2.467 | COG1250I:3-hydroxyacyl-CoA dehydrogenase                                                                                                             | 0.95 | 32  | 8  |
| CN1-Nbs | 2.455 | COG2373R:Large extracellular alpha-helical protein                                                                                                   | 0.95 | 27  | 6  |
| CN1-Nbs | 2.426 | COG0410E:ABC-type branched-chain amino acid transport systems, ATPase component                                                                      | 0.95 | 43  | 13 |
| CN1-Nbs | 2.409 | COG1593G:TRAP-type C4-dicarboxylate transport system, large permease component                                                                       | 0.95 | 29  | 7  |
| CN1-Nbs | 2.404 | COG0715P:ABC-type nitrate/sulfonate/bicarbonate transport systems, periplasmic components                                                            | 0.95 | 36  | 10 |
| CN1-Nbs | 2.404 | COG0365I:Acyl-coenzyme A synthetases/AMP-(fatty) acid ligases                                                                                        | 0.95 | 36  | 10 |
| CN1-Nbs | 2.36  | COG1171E:Threonine dehydratase                                                                                                                       | 0.95 | 21  | 4  |

|         |       |                                                                                                            |      |     |    |
|---------|-------|------------------------------------------------------------------------------------------------------------|------|-----|----|
| CN1-Nbs | 2.33  | COG1024I:Enoyl-CoA hydratase/carnithine racemase                                                           | 0.95 | 71  | 27 |
| CN1-Nbs | 2.312 | COG1846K:Transcriptional regulators                                                                        | 0.95 | 46  | 15 |
| CN1-Nbs | 2.296 | COG1670J:Acetyltransferases, including N-acetylases of ribosomal proteins                                  | 0.95 | 23  | 5  |
| CN1-Nbs | 2.269 | COG1414K:Transcriptional regulator                                                                         | 0.95 | 39  | 12 |
| CN1-Nbs | 2.245 | COG3523S:Uncharacterized protein conserved in bacteria                                                     | 0.95 | 20  | 4  |
| CN1-Nbs | 2.245 | COG2274V:ABC-type bacteriocin/lantibiotic exporters, contain an N-terminal double-glycine peptidase domain | 0.95 | 20  | 4  |
| CN1-Nbs | 2.245 | COG1653G:ABC-type sugar transport system, periplasmic component                                            | 0.95 | 20  | 4  |
| CN1-Nbs | 2.198 | COG0840NT:Methyl-accepting chemotaxis protein                                                              | 0.95 | 100 | 43 |
| CN1-Nbs | 2.184 | COG0251J:Putative translation initiation inhibitor, yjgF family                                            | 0.95 | 22  | 5  |
| CN1-Nbs | 2.136 | COG3203M:Outer membrane protein (porin)                                                                    | 0.95 | 24  | 6  |
| CN1-Nbs | 2.101 | COG1522K:Transcriptional regulators                                                                        | 0.95 | 35  | 11 |
| CN1-Nbs | 2.069 | COG0507L:ATP-dependent exoDNase (exonuclease V), alpha subunit - helicase superfamily I member             | 0.95 | 21  | 5  |
| CN1-Nbs | 2.069 | COG3842E:ABC-type spermidine/putrescine transport systems, ATPase components                               | 0.95 | 21  | 5  |
| CN1-Nbs | 2.067 | COG0329EM:Dihydrodipicolinate synthase/N-acetylneuraminate lyase                                           | 0.95 | 28  | 8  |
| CN1-Nbs | 2.039 | COG0451MG:Nucleoside-diphosphate-sugar epimerases                                                          | 0.95 | 51  | 19 |
| CN1-Nbs | 2.005 | COG1475K:Predicted transcriptional regulators                                                              | 0.95 | 34  | 11 |
| CN1-Nbs | 2.004 | COG1807M:4-amino-4-deoxy-L-arabinose transferase and related glycosyltransferases of PMT family            | 0.95 | 18  | 4  |
| CN1-Nbs | 1.989 | COG1529C:Aerobic-type carbon monoxide dehydrogenase, large subunit CoxL/CutL homologs                      | 0.95 | 25  | 7  |
|         |       |                                                                                                            |      |     |    |
| CN1-CN2 | 4.345 | COG3279KT:Response regulator of the LytR/AlgR family                                                       | 0.95 | 41  | 4  |
| CN1-CN2 | 4.046 | COG2931Q:RTX toxins and related Ca <sup>2+</sup> -binding proteins                                         | 0.99 | 75  | 19 |
| CN1-CN2 | 4.041 | COG3209M:Rhs family protein                                                                                | 0.95 | 40  | 5  |
| CN1-CN2 | 4.041 | COG0673R:Predicted dehydrogenases and related proteins                                                     | 0.95 | 40  | 5  |
| CN1-CN2 | 3.136 | COG0183I:Acetyl-CoA acetyltransferase                                                                      | 0.99 | 70  | 23 |
| CN1-CN2 | 3.085 | COG0612R:Predicted Zn-dependent peptidases                                                                 | 0.95 | 29  | 5  |
| CN1-CN2 | 3.061 | COG0318IQ:Acyl-CoA synthetases (AMP-forming)/AMP-acid ligases II                                           | 0.99 | 77  | 27 |
| CN1-CN2 | 2.811 | COG1609K:Transcriptional regulators                                                                        | 0.99 | 49  | 15 |
| CN1-CN2 | 2.599 | COG0438M:Glycosyltransferase                                                                               | 0.99 | 76  | 30 |
| CN1-CN2 | 2.585 | COG0683E:ABC-type branched-chain amino acid transport systems, periplasmic component                       | 0.99 | 109 | 48 |
| CN1-CN2 | 2.542 | COG0443O:Molecular chaperone                                                                               | 0.95 | 33  | 9  |
| CN1-CN2 | 2.527 | COG1197LK:Transcription-repair coupling factor (superfamily II helicase)                                   | 0.95 | 26  | 6  |
| CN1-CN2 | 2.471 | COG0451MG:Nucleoside-diphosphate-sugar epimerases                                                          | 0.95 | 51  | 18 |
| CN1-CN2 | 2.418 | COG0308E:Aminopeptidase N                                                                                  | 0.95 | 25  | 6  |
| CN1-CN2 | 2.396 | COG3523S:Uncharacterized protein conserved in bacteria                                                     | 0.95 | 20  | 4  |

|         |       |                                                                                                                                                      |      |     |     |
|---------|-------|------------------------------------------------------------------------------------------------------------------------------------------------------|------|-----|-----|
| CN1-CN2 | 2.275 | COG0399M:Predicted pyridoxal phosphate-dependent enzyme apparently involved in regulation of cell wall biogenesis                                    | 0.95 | 19  | 4   |
| CN1-CN2 | 2.149 | COG0463M:Glycosyltransferases involved in cell wall biogenesis                                                                                       | 0.95 | 51  | 20  |
| CN1-CN2 | 2.148 | COG2373R:Large extracellular alpha-helical protein                                                                                                   | 0.95 | 27  | 8   |
| CN1-CN2 | 2.141 | COG0559E:Branched-chain amino acid ABC-type transport system, permease components                                                                    | 0.95 | 64  | 27  |
| CN1-CN2 | 2.123 | COG0410E:ABC-type branched-chain amino acid transport systems, ATPase component                                                                      | 0.95 | 43  | 16  |
| CN1-CN2 | 2.119 | COG0265O:Trypsin-like serine proteases, typically periplasmic, contain C-terminal PDZ domain                                                         | 0.95 | 33  | 11  |
| CN1-CN2 | 2.119 | COG0664T:cAMP-binding proteins - catabolite gene activator and regulatory subunit of cAMP-dependent protein kinases                                  | 0.95 | 41  | 15  |
| CN1-CN2 | 2.075 | COG0702MG:Predicted nucleoside-diphosphate-sugar epimerases                                                                                          | 0.95 | 22  | 6   |
| CN1-CN2 | 2.047 | COG1846K:Transcriptional regulators                                                                                                                  | 0.95 | 46  | 18  |
| CN1-CN2 | 2.027 | COG4585T:Signal transduction histidine kinase                                                                                                        | 0.95 | 28  | 9   |
| CN1-CN2 | 1.966 | COG2197TK:Response regulator containing a CheY-like receiver domain and an HTH DNA-binding domain                                                    | 0.95 | 76  | 35  |
|         |       |                                                                                                                                                      |      |     |     |
| CN1-N   | 2.779 | COG0845M:Membrane-fusion protein                                                                                                                     | 0.99 | 96  | 7   |
| CN1-N   | 2.353 | COG2197TK:Response regulator containing a CheY-like receiver domain and an HTH DNA-binding domain                                                    | 0.95 | 76  | 6   |
| CN1-N   | 2.096 | COG0438M:Glycosyltransferase                                                                                                                         | 0.95 | 76  | 7   |
|         |       |                                                                                                                                                      |      |     |     |
| CN2-Nbs | 9.306 | COG0583K:Transcriptional regulator                                                                                                                   | 0.99 | 298 | 100 |
| CN2-Nbs | 6.302 | COG3181S:Uncharacterized protein conserved in bacteria                                                                                               | 0.99 | 118 | 35  |
| CN2-Nbs | 5.387 | COG3451U:Type IV secretory pathway, VirB4 components                                                                                                 | 0.95 | 47  | 6   |
| CN2-Nbs | 4.794 | COG1629P:Outer membrane receptor proteins, mostly Fe transport                                                                                       | 0.99 | 151 | 72  |
| CN2-Nbs | 4.208 | COG1012C:NAD-dependent aldehyde dehydrogenases                                                                                                       | 0.99 | 93  | 40  |
| CN2-Nbs | 4.13  | COG0747E:ABC-type dipeptide transport system, periplasmic component                                                                                  | 0.95 | 31  | 5   |
| CN2-Nbs | 3.939 | COG2207K:AraC-type DNA-binding domain-containing proteins                                                                                            | 0.99 | 72  | 29  |
| CN2-Nbs | 3.359 | COG1167KE:Transcriptional regulators containing a DNA-binding HTH domain and an aminotransferase domain (MocR family) and their eukaryotic orthologs | 0.99 | 30  | 8   |
| CN2-Nbs | 3.121 | COG1414K:Transcriptional regulator                                                                                                                   | 0.99 | 35  | 12  |
| CN2-Nbs | 3.041 | COG1028IQR:Dehydrogenases with different specificities (related to short-chain alcohol dehydrogenases)                                               | 0.99 | 151 | 95  |
| CN2-Nbs | 2.989 | COG0154J:Asp-tRNA <sup>Asn</sup> /Glu-tRNA <sup>Gln</sup> amidotransferase A subunit and related amidases                                            | 0.99 | 25  | 7   |
| CN2-Nbs | 2.964 | COG0765E:ABC-type amino acid transport system, permease component                                                                                    | 0.95 | 19  | 4   |
| CN2-Nbs | 2.964 | COG0601EP:ABC-type dipeptide/oligopeptide/nickel transport systems, permease components                                                              | 0.95 | 21  | 5   |
| CN2-Nbs | 2.935 | COG0277C:FAD/FMN-containing dehydrogenases                                                                                                           | 0.99 | 43  | 18  |
| CN2-Nbs | 2.911 | COG0665E:Glycine/D-amino acid oxidases (deaminating)                                                                                                 | 0.99 | 38  | 15  |
| CN2-Nbs | 2.85  | COG0477GEPR:Permeases of the major facilitator superfamily                                                                                           | 0.99 | 119 | 73  |
| CN2-Nbs | 2.825 | COG0843C:Heme/copper-type cytochrome/quinol oxidases, subunit 1                                                                                      | 0.95 | 18  | 4   |

|         |       |                                                                                                                                                                          |      |     |     |
|---------|-------|--------------------------------------------------------------------------------------------------------------------------------------------------------------------------|------|-----|-----|
| CN2-Nbs | 2.734 | COG1404O:Subtilisin-like serine proteases                                                                                                                                | 0.99 | 23  | 7   |
| CN2-Nbs | 2.69  | COG0841V:Cation/multidrug efflux pump                                                                                                                                    | 0.99 | 86  | 50  |
| CN2-Nbs | 2.628 | COG0596R:Predicted hydrolases or acyltransferases (alpha/beta hydrolase superfamily)                                                                                     | 0.99 | 59  | 31  |
| CN2-Nbs | 2.576 | COG0840NT:Methyl-accepting chemotaxis protein                                                                                                                            | 0.95 | 75  | 43  |
| CN2-Nbs | 2.571 | COG0582L:Integrase                                                                                                                                                       | 0.95 | 79  | 46  |
| CN2-Nbs | 2.509 | COG1475K:Predicted transcriptional regulators                                                                                                                            | 0.95 | 28  | 11  |
| CN2-Nbs | 2.436 | COG0028EH:Thiamine pyrophosphate-requiring enzymes [acetolactate synthase, pyruvate dehydrogenase (cytochrome), glyoxylate carboligase, phosphonopyruvate decarboxylase] | 0.95 | 29  | 12  |
| CN2-Nbs | 2.429 | COG3481R:Predicted HD-superfamily hydrolase                                                                                                                              | 0.95 | 19  | 6   |
| CN2-Nbs | 2.321 | COG1024I:Enoyl-CoA hydratase/carnithine racemase                                                                                                                         | 0.95 | 50  | 27  |
| CN2-Nbs | 2.304 | COG1192D:ATPases involved in chromosome partitioning                                                                                                                     | 0.95 | 31  | 14  |
| CN2-Nbs | 2.298 | COG0642T:Signal transduction histidine kinase                                                                                                                            | 0.95 | 138 | 95  |
| CN2-Nbs | 2.282 | COG1020Q:Non-ribosomal peptide synthetase modules and related proteins                                                                                                   | 0.95 | 18  | 6   |
| CN2-Nbs | 2.249 | COG2197TK:Response regulator containing a CheY-like receiver domain and an HTH DNA-binding domain                                                                        | 0.95 | 35  | 17  |
| CN2-Nbs | 2.243 | COG0251J:Putative translation initiation inhibitor, yjgF family                                                                                                          | 0.95 | 16  | 5   |
| CN2-Nbs | 2.236 | COG0745TK:Response regulators consisting of a CheY-like receiver domain and a winged-helix DNA-binding domain                                                            | 0.95 | 76  | 47  |
| CN2-Nbs | 2.136 | COG0697GER:Permeases of the drug/metabolite transporter (DMT) superfamily                                                                                                | 0.95 | 34  | 17  |
| CN2-Nbs | 2.129 | COG1049C:Aconitase B                                                                                                                                                     | 0.95 | 17  | 6   |
| CN2-Nbs | 2.086 | COG0179Q:2-keto-4-pentenoate hydratase/2-oxohepta-3-ene-1,7-dioic acid hydratase (catechol pathway)                                                                      | 0.95 | 20  | 8   |
| CN2-Nbs | 2.041 | COG4993G:Glucose dehydrogenase                                                                                                                                           | 0.95 | 13  | 4   |
| CN2-Nbs | 2.041 | COG1305E:Transglutaminase-like enzymes, putative cysteine proteases                                                                                                      | 0.95 | 13  | 4   |
| CN2-Nbs | 2.028 | COG1802K:Transcriptional regulators                                                                                                                                      | 0.95 | 18  | 7   |
| CN2-Nbs | 2.028 | COG0693R:Putative intracellular protease/amidase                                                                                                                         | 0.95 | 18  | 7   |
| CN2-Nbs | 2.028 | COG2303E:Choline dehydrogenase and related flavoproteins                                                                                                                 | 0.95 | 18  | 7   |
| CN2-Nbs | 1.966 | COG0625O:Glutathione S-transferase                                                                                                                                       | 0.95 | 45  | 26  |
|         |       |                                                                                                                                                                          |      |     |     |
| CN2-CN1 | 5.818 | COG0582L:Integrase                                                                                                                                                       | 0.99 | 79  | 39  |
| CN2-CN1 | 5.172 | COG0583K:Transcriptional regulator                                                                                                                                       | 0.99 | 298 | 285 |
| CN2-CN1 | 4.915 | COG3451U:Type IV secretory pathway, VirB4 components                                                                                                                     | 0.99 | 47  | 20  |
| CN2-CN1 | 4.159 | COG0784T:FOG: CheY-like receiver                                                                                                                                         | 0.99 | 57  | 35  |
| CN2-CN1 | 4.143 | COG0553KL:Superfamily II DNA/RNA helicases, SNF2 family                                                                                                                  | 0.99 | 38  | 18  |
| CN2-CN1 | 3.732 | COG0642T:Signal transduction histidine kinase                                                                                                                            | 0.99 | 138 | 128 |
| CN2-CN1 | 3.364 | COG3039L:Transposase and inactivated derivatives, IS5 family                                                                                                             | 0.99 | 19  | 7   |
| CN2-CN1 | 3.295 | COG3210U:Large exoproteins involved in heme utilization or adhesion                                                                                                      | 0.99 | 41  | 27  |

|         |       |                                                                                                        |      |     |     |
|---------|-------|--------------------------------------------------------------------------------------------------------|------|-----|-----|
| CN2-CN1 | 3.079 | COG0789K:Predicted transcriptional regulators                                                          | 0.99 | 30  | 18  |
| CN2-CN1 | 3.061 | COG0668M:Small-conductance mechanosensitive channel                                                    | 0.95 | 16  | 6   |
| CN2-CN1 | 3.008 | COG1049C:Aconitase B                                                                                   | 0.99 | 17  | 7   |
| CN2-CN1 | 2.93  | COG2199T:FOG: GGDEF domain                                                                             | 0.99 | 41  | 30  |
| CN2-CN1 | 2.928 | COG0550L:Topoisomerase IA                                                                              | 0.99 | 19  | 9   |
| CN2-CN1 | 2.869 | COG3706T:Response regulator containing a CheY-like receiver domain and a GGDEF domain                  | 0.95 | 15  | 6   |
| CN2-CN1 | 2.725 | COG1974KT:SOS-response transcriptional repressors (RecA-mediated autopeptidases)                       | 0.95 | 13  | 5   |
| CN2-CN1 | 2.626 | COG2890J:Methylase of polypeptide chain release factors                                                | 0.99 | 15  | 7   |
| CN2-CN1 | 2.626 | COG1289S:Predicted membrane protein                                                                    | 0.99 | 15  | 7   |
| CN2-CN1 | 2.575 | COG3311K:Predicted transcriptional regulator                                                           | 0.95 | 11  | 4   |
| CN2-CN1 | 2.575 | COG1113E:Gamma-aminobutyrate permease and related permeases                                            | 0.95 | 11  | 4   |
| CN2-CN1 | 2.563 | COG0526OC:Thiol-disulfide isomerase and thioredoxins                                                   | 0.95 | 39  | 31  |
| CN2-CN1 | 2.543 | COG0629L:Single-stranded DNA-binding protein                                                           | 0.95 | 18  | 10  |
| CN2-CN1 | 2.511 | COG3971Q:2-keto-4-pentenoate hydratase                                                                 | 0.95 | 12  | 5   |
| CN2-CN1 | 2.511 | COG2826L:Transposase and inactivated derivatives, IS30 family                                          | 0.95 | 12  | 5   |
| CN2-CN1 | 2.511 | COG5001T:Predicted signal transduction protein containing a membrane domain, an EAL and a GGDEF domain | 0.95 | 12  | 5   |
| CN2-CN1 | 2.396 | COG1062C:Zn-dependent alcohol dehydrogenases, class III                                                | 0.95 | 15  | 8   |
| CN2-CN1 | 2.345 | COG1651O:Protein-disulfide isomerase                                                                   | 0.95 | 18  | 11  |
| CN2-CN1 | 2.342 | COG3419NU:Tfp pilus assembly protein, tip-associated adhesin PilY1                                     | 0.95 | 10  | 4   |
| CN2-CN1 | 2.342 | COG1450NU:Type II secretory pathway, component PulD                                                    | 0.95 | 10  | 4   |
| CN2-CN1 | 2.336 | COG2963L:Transposase and inactivated derivatives                                                       | 0.95 | 26  | 19  |
| CN2-CN1 | 2.33  | COG1028IQR:Dehydrogenases with different specificities (related to short-chain alcohol dehydrogenases) | 0.95 | 151 | 170 |
| CN2-CN1 | 2.323 | COG2801L:Transposase and inactivated derivatives                                                       | 0.95 | 59  | 56  |
| CN2-CN1 | 2.214 | COG1734T:DnaK suppressor protein                                                                       | 0.95 | 13  | 7   |
| CN2-CN1 | 2.214 | COG4773P:Outer membrane receptor for ferric coprogen and ferric-rhodotorulic acid                      | 0.95 | 13  | 7   |
| CN2-CN1 | 2.18  | COG2010C:Cytochrome c, mono- and diheme variants                                                       | 0.95 | 25  | 19  |
| CN2-CN1 | 2.166 | COG1404O:Subtilisin-like serine proteases                                                              | 0.95 | 23  | 17  |
| CN2-CN1 | 2.153 | COG0515RTRL:Serine/threonine protein kinase                                                            | 0.95 | 19  | 13  |
| CN2-CN1 | 2.096 | COG0460E:Homoserine dehydrogenase                                                                      | 0.95 | 9   | 4   |
| CN2-CN1 | 2.096 | COG0334E:Glutamate dehydrogenase/leucine dehydrogenase                                                 | 0.95 | 9   | 4   |
| CN2-CN1 | 2.096 | COG0471P:Di- and tricarboxylate transporters                                                           | 0.95 | 9   | 4   |
| CN2-CN1 | 2.049 | COG2165NU:Type II secretory pathway, pseudopilin PulG                                                  | 0.95 | 10  | 5   |
| CN2-CN1 | 2.049 | COG1002V:Type II restriction enzyme, methylase subunits                                                | 0.95 | 10  | 5   |
| CN2-CN1 | 2.049 | COG0439I:Biotin carboxylase                                                                            | 0.95 | 10  | 5   |

|         |       |                                                                                                                                                      |      |    |     |
|---------|-------|------------------------------------------------------------------------------------------------------------------------------------------------------|------|----|-----|
| CN2-CN1 | 2.017 | COG0348C:Polyferredoxin                                                                                                                              | 0.95 | 11 | 6   |
| CN2-CN1 | 1.995 | COG1894C:NADH:ubiquinone oxidoreductase, NADH-binding (51 kD) subunit                                                                                | 0.95 | 12 | 7   |
| CN2-CN1 | 1.995 | COG0270L:Site-specific DNA methylase                                                                                                                 | 0.95 | 12 | 7   |
| CN2-CN1 | 1.976 | COG3501S:Uncharacterized protein conserved in bacteria                                                                                               | 0.95 | 19 | 14  |
| CN2-CN1 | 1.971 | COG2378K:Predicted transcriptional regulator                                                                                                         | 0.95 | 14 | 9   |
| CN2-CN1 | 1.971 | COG0835NT:Chemotaxis signal transduction protein                                                                                                     | 0.95 | 14 | 9   |
| CN2-CN1 | 1.971 | COG1236J:Predicted exonuclease of the beta-lactamase fold involved in RNA processing                                                                 | 0.95 | 14 | 9   |
| CN2-CN1 | 1.971 | COG0643NT:Chemotaxis protein histidine kinase and related kinases                                                                                    | 0.95 | 14 | 9   |
| CN2-CN1 | 1.971 | COG2003L:DNA repair proteins                                                                                                                         | 0.95 | 18 | 13  |
| CN2-CN1 | 1.971 | COG0693R:Putative intracellular protease/amidase                                                                                                     | 0.95 | 18 | 13  |
| CN2-CN1 | 1.967 | COG0810M:Periplasmic protein TonB, links inner and outer membranes                                                                                   | 0.95 | 17 | 12  |
| CN2-CN1 | 1.967 | COG2200T:FOG: EAL domain                                                                                                                             | 0.95 | 17 | 12  |
| CN2-CN1 | 1.967 | COG1230P:Co/Zn/Cd efflux system component                                                                                                            | 0.95 | 15 | 10  |
|         |       |                                                                                                                                                      |      |    |     |
| CN2-N   | 2.461 | COG0845M:Membrane-fusion protein                                                                                                                     | 0.95 | 60 | 7   |
| CN2-N   | 2.087 | COG0277C:FAD/FMN-containing dehydrogenases                                                                                                           | 0.95 | 43 | 5   |
|         |       |                                                                                                                                                      |      |    |     |
| N-Nbs   | 5.556 | COG0840NT:Methyl-accepting chemotaxis protein                                                                                                        | 0.99 | 43 | 43  |
| N-Nbs   | 5.497 | COG0583K:Transcriptional regulator                                                                                                                   | 0.99 | 73 | 100 |
| N-Nbs   | 5.193 | COG1012C:NAD-dependent aldehyde dehydrogenases                                                                                                       | 0.99 | 39 | 40  |
| N-Nbs   | 4.185 | COG1020Q:Non-ribosomal peptide synthetase modules and related proteins                                                                               | 0.95 | 12 | 6   |
| N-Nbs   | 4.012 | COG1167KE:Transcriptional regulators containing a DNA-binding HTH domain and an aminotransferase domain (MocR family) and their eukaryotic orthologs | 0.99 | 13 | 8   |
| N-Nbs   | 3.557 | COG0531E:Amino acid transporters                                                                                                                     | 0.95 | 10 | 6   |
| N-Nbs   | 3.544 | COG0596R:Predicted hydrolases or acyltransferases (alpha/beta hydrolase superfamily)                                                                 | 0.99 | 25 | 31  |
| N-Nbs   | 3.223 | COG4644L:Transposase and inactivated derivatives, TnpA family                                                                                        | 0.99 | 13 | 12  |
| N-Nbs   | 3.223 | COG2200T:FOG: EAL domain                                                                                                                             | 0.99 | 13 | 12  |
| N-Nbs   | 3.218 | COG0112E:Glycine/serine hydroxymethyltransferase                                                                                                     | 0.95 | 9  | 6   |
| N-Nbs   | 3.145 | COG0834ET:ABC-type amino acid transport/signal transduction systems, periplasmic component/domain                                                    | 0.99 | 20 | 25  |
| N-Nbs   | 3.125 | COG4977K:Transcriptional regulator containing an amidase domain and an AraC-type DNA-binding HTH domain                                              | 0.95 | 8  | 5   |
| N-Nbs   | 2.992 | COG0642T:Signal transduction histidine kinase                                                                                                        | 0.99 | 51 | 95  |
| N-Nbs   | 2.945 | COG1538MU:Outer membrane protein                                                                                                                     | 0.99 | 26 | 39  |
| N-Nbs   | 2.93  | COG0174E:Glutamine synthetase                                                                                                                        | 0.99 | 12 | 12  |
| N-Nbs   | 2.92  | COG2202T:FOG: PAS/PAC domain                                                                                                                         | 0.99 | 18 | 23  |



|       |       |                                                                                                            |      |    |     |
|-------|-------|------------------------------------------------------------------------------------------------------------|------|----|-----|
| N-Nbs | 2.745 | COG0477GEPR:Permeases of the major facilitator superfamily                                                 | 0.99 | 40 | 73  |
| N-Nbs | 2.627 | COG3523S:Uncharacterized protein conserved in bacteria                                                     | 0.95 | 6  | 4   |
| N-Nbs | 2.627 | COG0843C:Heme/copper-type cytochrome/quinol oxidases, subunit 1                                            | 0.95 | 6  | 4   |
| N-Nbs | 2.479 | COG3264M:Small-conductance mechanosensitive channel                                                        | 0.95 | 7  | 6   |
| N-Nbs | 2.454 | COG0085K:DNA-directed RNA polymerase, beta subunit/140 kD subunit                                          | 0.95 | 11 | 13  |
| N-Nbs | 2.425 | COG4638PR:Phenylpropionate dioxygenase and related ring-hydroxylating dioxygenases, large terminal subunit | 0.95 | 13 | 17  |
| N-Nbs | 2.392 | COG1250I:3-hydroxyacyl-CoA dehydrogenase                                                                   | 0.95 | 8  | 8   |
| N-Nbs | 2.291 | COG0443O:Molecular chaperone                                                                               | 0.95 | 11 | 14  |
| N-Nbs | 2.237 | COG0753P:Catalase                                                                                          | 0.95 | 7  | 7   |
| N-Nbs | 2.237 | COG1802K:Transcriptional regulators                                                                        | 0.95 | 7  | 7   |
| N-Nbs | 2.237 | COG2201NT:Chemotaxis response regulator containing a CheY-like receiver domain and a methylesterase domain | 0.95 | 7  | 7   |
| N-Nbs | 2.182 | COG0308E:Aminopeptidase N                                                                                  | 0.95 | 5  | 4   |
| N-Nbs | 2.182 | COG0439I:Biotin carboxylase                                                                                | 0.95 | 5  | 4   |
| N-Nbs | 2.182 | COG0765E:ABC-type amino acid transport system, permease component                                          | 0.95 | 5  | 4   |
| N-Nbs | 2.182 | COG1793L:ATP-dependent DNA ligase                                                                          | 0.95 | 5  | 4   |
| N-Nbs | 2.182 | COG1737K:Transcriptional regulators                                                                        | 0.95 | 5  | 4   |
| N-Nbs | 2.182 | COG1391OT:Glutamine synthetase adenylyltransferase                                                         | 0.95 | 5  | 4   |
| N-Nbs | 2.182 | COG2234R:Predicted aminopeptidases                                                                         | 0.95 | 5  | 4   |
| N-Nbs | 2.153 | COG0402FR:Cytosine deaminase and related metal-dependent hydrolases                                        | 0.95 | 9  | 11  |
| N-Nbs | 2.071 | COG1570L:Exonuclease VII, large subunit                                                                    | 0.95 | 6  | 6   |
| N-Nbs | 2.035 | COG3696P:Putative silver efflux pump                                                                       | 0.95 | 14 | 22  |
| N-Nbs | 2.015 | COG1352NT:Methylase of chemotaxis methyl-accepting proteins                                                | 0.95 | 7  | 8   |
| N-Nbs | 1.986 | COG0057G:Glyceraldehyde-3-phosphate dehydrogenase/erythrose-4-phosphate dehydrogenase                      | 0.95 | 11 | 16  |
|       |       |                                                                                                            |      |    |     |
| N-CN1 | 4.643 | COG4644L:Transposase and inactivated derivatives, TnpA family                                              | 0.99 | 13 | 12  |
| N-CN1 | 4.643 | COG2200T:FOG: EAL domain                                                                                   | 0.99 | 13 | 12  |
| N-CN1 | 4.568 | COG2202T:FOG: PAS/PAC domain                                                                               | 0.99 | 18 | 23  |
| N-CN1 | 4.301 | COG0057G:Glyceraldehyde-3-phosphate dehydrogenase/erythrose-4-phosphate dehydrogenase                      | 0.99 | 11 | 10  |
| N-CN1 | 4.261 | COG5001T:Predicted signal transduction protein containing a membrane domain, an EAL and a GGDEF domain     | 0.95 | 8  | 5   |
| N-CN1 | 4.141 | COG0840NT:Methyl-accepting chemotaxis protein                                                              | 0.99 | 43 | 100 |
| N-CN1 | 4.073 | COG0642T:Signal transduction histidine kinase                                                              | 0.99 | 51 | 128 |
| N-CN1 | 3.942 | COG0174E:Glutamine synthetase                                                                              | 0.99 | 12 | 14  |
| N-CN1 | 3.579 | COG3501S:Uncharacterized protein conserved in bacteria                                                     | 0.99 | 11 | 14  |
| N-CN1 | 3.524 | COG2113E:ABC-type proline/glycine betaine transport systems, periplasmic components                        | 0.95 | 7  | 6   |

|       |       |                                                                                                         |      |    |     |
|-------|-------|---------------------------------------------------------------------------------------------------------|------|----|-----|
| N-CN1 | 3.48  | COG0050J:GTPases - translation elongation factors                                                       | 0.99 | 12 | 17  |
| N-CN1 | 3.438 | COG0582L:Integrase                                                                                      | 0.99 | 20 | 39  |
| N-CN1 | 3.366 | COG0543HC:2-polyprenylphenol hydroxylase and related flavodoxin oxidoreductases                         | 0.99 | 10 | 13  |
| N-CN1 | 3.303 | COG1570L:Exonuclease VII, large subunit                                                                 | 0.95 | 6  | 5   |
| N-CN1 | 3.303 | COG2826L:Transposase and inactivated derivatives, IS30 family                                           | 0.95 | 6  | 5   |
| N-CN1 | 3.286 | COG0835NT:Chemotaxis signal transduction protein                                                        | 0.99 | 8  | 9   |
| N-CN1 | 3.265 | COG0834ET:ABC-type amino acid transport/signal transduction systems, periplasmic component/domain       | 0.99 | 20 | 41  |
| N-CN1 | 3.203 | COG0210L:Superfamily I DNA and RNA helicases                                                            | 0.99 | 12 | 19  |
| N-CN1 | 3.068 | COG2766T:Putative Ser protein kinase                                                                    | 0.95 | 5  | 4   |
| N-CN1 | 3.031 | COG3706T:Response regulator containing a CheY-like receiver domain and a GGDEF domain                   | 0.95 | 6  | 6   |
| N-CN1 | 2.995 | COG0784T:FOG: CheY-like receiver                                                                        | 0.99 | 17 | 35  |
| N-CN1 | 2.901 | COG2199T:FOG: GGDEF domain                                                                              | 0.99 | 15 | 30  |
| N-CN1 | 2.836 | COG0643NT:Chemotaxis protein histidine kinase and related kinases                                       | 0.99 | 7  | 9   |
| N-CN1 | 2.812 | COG0112E:Glycine/serine hydroxymethyltransferase                                                        | 0.99 | 9  | 14  |
| N-CN1 | 2.787 | COG4773P:Outer membrane receptor for ferric coprogen and ferric-rhodotorulic acid                       | 0.95 | 6  | 7   |
| N-CN1 | 2.767 | COG0082E:Chorismate synthase                                                                            | 0.95 | 5  | 5   |
| N-CN1 | 2.767 | COG0439I:Biotin carboxylase                                                                             | 0.95 | 5  | 5   |
| N-CN1 | 2.767 | COG3459G:Cellobiose phosphorylase                                                                       | 0.95 | 5  | 5   |
| N-CN1 | 2.66  | COG0402FR:Cytosine deaminase and related metal-dependent hydrolases                                     | 0.99 | 9  | 15  |
| N-CN1 | 2.641 | COG1352NT:Methylase of chemotaxis methyl-accepting proteins                                             | 0.99 | 7  | 10  |
| N-CN1 | 2.622 | COG0553KL:Superfamily II DNA/RNA helicases, SNF2 family                                                 | 0.99 | 10 | 18  |
| N-CN1 | 2.564 | COG0469G:Pyruvate kinase                                                                                | 0.95 | 6  | 8   |
| N-CN1 | 2.561 | COG4977K:Transcriptional regulator containing an amidase domain and an AraC-type DNA-binding HTH domain | 0.95 | 8  | 13  |
| N-CN1 | 2.505 | COG1012C:NAD-dependent aldehyde dehydrogenases                                                          | 0.95 | 39 | 120 |
| N-CN1 | 2.502 | COG0668M:Small-conductance mechanosensitive channel                                                     | 0.95 | 5  | 6   |
| N-CN1 | 2.502 | COG0196H:FAD synthase                                                                                   | 0.95 | 5  | 6   |
| N-CN1 | 2.492 | COG1538MU:Outer membrane protein                                                                        | 0.95 | 26 | 72  |
| N-CN1 | 2.475 | COG1322S:Uncharacterized protein conserved in bacteria                                                  | 0.95 | 4  | 4   |
| N-CN1 | 2.475 | COG3285L:Predicted eukaryotic-type DNA primase                                                          | 0.95 | 4  | 4   |
| N-CN1 | 2.475 | COG0190H:5,10-methylene-tetrahydrofolate dehydrogenase/Methenyl tetrahydrofolate cyclohydrolase         | 0.95 | 4  | 4   |
| N-CN1 | 2.475 | COG1966T:Carbon starvation protein, predicted membrane protein                                          | 0.95 | 4  | 4   |
| N-CN1 | 2.46  | COG0753P:Catalase                                                                                       | 0.95 | 7  | 11  |
| N-CN1 | 2.36  | COG2831U:Hemolysin activation/secretion protein                                                         | 0.95 | 6  | 9   |
| N-CN1 | 2.36  | COG0520E:Selenocysteine lyase                                                                           | 0.95 | 6  | 9   |

|       |       |                                                                                             |      |    |    |
|-------|-------|---------------------------------------------------------------------------------------------|------|----|----|
| N-CN1 | 2.36  | COG3547L:Transposase and inactivated derivatives                                            | 0.95 | 6  | 9  |
| N-CN1 | 2.29  | COG0465O:ATP-dependent Zn proteases                                                         | 0.95 | 7  | 12 |
| N-CN1 | 2.29  | COG0617J:tRNA nucleotidyltransferase/poly(A) polymerase                                     | 0.95 | 7  | 12 |
| N-CN1 | 2.264 | COG0047F:Phosphoribosylformylglycinamide (FGAM) synthase, glutamine amidotransferase domain | 0.95 | 5  | 7  |
| N-CN1 | 2.264 | COG3039L:Transposase and inactivated derivatives, IS5 family                                | 0.95 | 5  | 7  |
| N-CN1 | 2.258 | COG4584L:Transposase and inactivated derivatives                                            | 0.95 | 8  | 15 |
| N-CN1 | 2.182 | COG2894D:Septum formation inhibitor-activating ATPase                                       | 0.95 | 4  | 5  |
| N-CN1 | 2.182 | COG2124Q:Cytochrome P450                                                                    | 0.95 | 4  | 5  |
| N-CN1 | 2.182 | COG0150F:Phosphoribosylaminoimidazole (AIR) synthetase                                      | 0.95 | 4  | 5  |
| N-CN1 | 2.182 | COG0151F:Phosphoribosylamine-glycine ligase                                                 | 0.95 | 4  | 5  |
| N-CN1 | 2.182 | COG1047O:FKBP-type peptidyl-prolyl cis-trans isomerases 2                                   | 0.95 | 4  | 5  |
| N-CN1 | 2.182 | COG0456R:Acetyltransferases                                                                 | 0.95 | 4  | 5  |
| N-CN1 | 2.182 | COG0807H:GTP cyclohydrolase II                                                              | 0.95 | 4  | 5  |
| N-CN1 | 2.172 | COG0069E:Glutamate synthase domain 2                                                        | 0.95 | 6  | 10 |
| N-CN1 | 2.172 | COG0046F:Phosphoribosylformylglycinamide (FGAM) synthase, synthetase domain                 | 0.95 | 6  | 10 |
| N-CN1 | 2.14  | COG3696P:Putative silver efflux pump                                                        | 0.95 | 14 | 35 |
| N-CN1 | 2.12  | COG0458EF:Carbamoylphosphate synthase large subunit (split gene in MJ)                      | 0.95 | 9  | 19 |
| N-CN1 | 2.11  | COG2931Q:RTX toxins and related Ca <sup>2+</sup> -binding proteins                          | 0.95 | 25 | 75 |
| N-CN1 | 2.049 | COG1391OT:Glutamine synthetase adenylyltransferase                                          | 0.95 | 5  | 8  |
| N-CN1 | 2.049 | COG0288P:Carbonic anhydrase                                                                 | 0.95 | 5  | 8  |
| N-CN1 | 1.997 | COG2823R:Predicted periplasmic or secreted lipoprotein                                      | 0.95 | 6  | 11 |
| N-CN1 | 1.997 | COG0751J:Glycyl-tRNA synthetase, beta subunit                                               | 0.95 | 6  | 11 |
|       |       |                                                                                             |      |    |    |
| N-CN2 | 5.315 | COG2931Q:RTX toxins and related Ca <sup>2+</sup> -binding proteins                          | 0.99 | 25 | 19 |
| N-CN2 | 5.236 | COG3209M:Rhs family protein                                                                 | 0.95 | 14 | 5  |
| N-CN2 | 3.919 | COG0174E:Glutamine synthetase                                                               | 0.99 | 12 | 8  |
| N-CN2 | 3.705 | COG0050J:GTPases - translation elongation factors                                           | 0.99 | 12 | 9  |
| N-CN2 | 3.452 | COG0840NT:Methyl-accepting chemotaxis protein                                               | 0.99 | 43 | 75 |
| N-CN2 | 3.393 | COG0112E:Glycine/serine hydroxymethyltransferase                                            | 0.95 | 9  | 6  |
| N-CN2 | 3.393 | COG0458EF:Carbamoylphosphate synthase large subunit (split gene in MJ)                      | 0.95 | 9  | 6  |
| N-CN2 | 3.388 | COG0443O:Molecular chaperone                                                                | 0.99 | 11 | 9  |
| N-CN2 | 3.192 | COG3264M:Small-conductance mechanosensitive channel                                         | 0.95 | 7  | 4  |
| N-CN2 | 2.997 | COG0057G:Glyceraldehyde-3-phosphate dehydrogenase/erythrose-4-phosphate dehydrogenase       | 0.99 | 11 | 11 |
| N-CN2 | 2.932 | COG4644L:Transposase and inactivated derivatives, TnpA family                               | 0.99 | 13 | 15 |

|       |       |                                                                                                            |      |    |    |
|-------|-------|------------------------------------------------------------------------------------------------------------|------|----|----|
| N-CN2 | 2.77  | COG3523S:Uncharacterized protein conserved in bacteria                                                     | 0.95 | 6  | 4  |
| N-CN2 | 2.77  | COG0469G:Pyruvate kinase                                                                                   | 0.95 | 6  | 4  |
| N-CN2 | 2.77  | COG1570L:Exonuclease VII, large subunit                                                                    | 0.95 | 6  | 4  |
| N-CN2 | 2.695 | COG2202T:FOG: PAS/PAC domain                                                                               | 0.99 | 18 | 27 |
| N-CN2 | 2.633 | COG2200T:FOG: EAL domain                                                                                   | 0.99 | 13 | 17 |
| N-CN2 | 2.632 | COG0465O:ATP-dependent Zn proteases                                                                        | 0.95 | 7  | 6  |
| N-CN2 | 2.476 | COG1082G:Sugar phosphate isomerases/epimerases                                                             | 0.95 | 6  | 5  |
| N-CN2 | 2.476 | COG2823R:Predicted periplasmic or secreted lipoprotein                                                     | 0.95 | 6  | 5  |
| N-CN2 | 2.39  | COG0617J:tRNA nucleotidyltransferase/poly(A) polymerase                                                    | 0.95 | 7  | 7  |
| N-CN2 | 2.327 | COG0330O:Membrane protease subunits, stomatin/prohibitin homologs                                          | 0.95 | 11 | 15 |
| N-CN2 | 2.312 | COG4569Q:Acetaldehyde dehydrogenase (acetylating)                                                          | 0.95 | 5  | 4  |
| N-CN2 | 2.312 | COG0196H:FAD synthase                                                                                      | 0.95 | 5  | 4  |
| N-CN2 | 2.312 | COG2766T:Putative Ser protein kinase                                                                       | 0.95 | 5  | 4  |
| N-CN2 | 2.227 | COG1538MU:Outer membrane protein                                                                           | 0.95 | 26 | 51 |
| N-CN2 | 2.213 | COG0621J:2-methylthioadenine synthetase                                                                    | 0.95 | 6  | 6  |
| N-CN2 | 2.199 | COG1020Q:Non-ribosomal peptide synthetase modules and related proteins                                     | 0.95 | 12 | 18 |
| N-CN2 | 2.161 | COG0531E:Amino acid transporters                                                                           | 0.95 | 10 | 14 |
| N-CN2 | 2.152 | COG0834E:ABC-type amino acid transport/signal transduction systems, periplasmic component/domain           | 0.95 | 20 | 37 |
| N-CN2 | 2.151 | COG3436L:Transposase and inactivated derivatives                                                           | 0.95 | 8  | 10 |
| N-CN2 | 2.065 | COG2204T:Response regulator containing CheY-like receiver, AAA-type ATPase, and DNA-binding domains        | 0.95 | 12 | 19 |
| N-CN2 | 2.02  | COG0612R:Predicted Zn-dependent peptidases                                                                 | 0.95 | 5  | 5  |
| N-CN2 | 2.02  | COG0288P:Carbonic anhydrase                                                                                | 0.95 | 5  | 5  |
| N-CN2 | 2.013 | COG3696P:Putative silver efflux pump                                                                       | 0.95 | 14 | 24 |
| N-CN2 | 2.007 | COG0543HC:2-polyprenylphenol hydroxylase and related flavodoxin oxidoreductases                            | 0.95 | 10 | 15 |
| N-CN2 | 1.974 | COG4638PR:Phenylpropionate dioxygenase and related ring-hydroxylating dioxygenases, large terminal subunit | 0.95 | 13 | 22 |
| N-CN2 | 1.968 | COG3344L:Retron-type reverse transcriptase                                                                 | 0.95 | 8  | 11 |
| N-CN2 | 1.968 | COG4977K:Transcriptional regulator containing an amidase domain and an AraC-type DNA-binding HTH domain    | 0.95 | 8  | 11 |

<sup>1</sup>z-scores were calculated as proposed by Li (2009). See **Supplementary Materials and Methods** for details. Confidence levels of 0.95 and 0.99 are defined by z values of 1.96 and 2.58, and minimum H (the total number of observations in metagenomes) values of 4 and 7, respectively (Li, 2009). Over-representation of COG functions was made by pair comparisons as indicated.

<sup>2</sup>COG categories included: A (RNA processing and modification), B (Chromatin structure and dynamics), C (Energy production and conversion), D (Cell cycle control and mitosis), E (Amino acid metabolism and transport), F (Nucleotide metabolism and transport), G (Carbohydrate metabolism and transport), H (Coenzyme metabolism), I (Lipid metabolism), J (Translation), K (Transcription), L (Replication and repair), M (Cell

wall/membrane/envelop biogenesis), N (Cell otility), O (Post-translational modification, protein turnover, chaperone functions), Q (Secondary structure), T (Signal transduction), U (Intracellular trafficking and secretion), Y (Nuclear structure), Z (Cytoskeleton), R (General function prediction only) and S (Function unknown).

<sup>3</sup>The number of genes identified per COG is specifically indicated as *Instances in set 1* for those found in the metagenome 1 and *Instances in set 2* for those found in the metagenome 2. The percentage of those genes in relation to the total number of genes in a given metagenome is shown in panel (B).

(B) Percentage of genes per COG found to be enriched (see (A)).

| Class <sup>1</sup>                                                                                            | Percentage (%) of the nr. genes in N <sup>2</sup> | Percentage (%) of the nr. genes in Nbs <sup>2</sup> | Percentage (%) of the nr. genes in CN1 <sup>2</sup> | Percentage (%) of the nr. genes in CN2 <sup>2</sup> |
|---------------------------------------------------------------------------------------------------------------|---------------------------------------------------|-----------------------------------------------------|-----------------------------------------------------|-----------------------------------------------------|
| COG0583K:Transcriptional regulator                                                                            | 1.743                                             | 0.768                                               | 1.401                                               | 2.136                                               |
| COG0642T:Signal transduction histidine kinase                                                                 | 1.217                                             | 0.73                                                | 0.629                                               | 0.989                                               |
| COG1028IQR:Dehydrogenases with different specificities (related to short-chain alcohol dehydrogenases)        | 0.907                                             | 0.73                                                | 0.836                                               | 1.082                                               |
| COG0477GEPR:Permeases of the major facilitator superfamily                                                    | 0.955                                             | 0.561                                               | 0.733                                               | 0.853                                               |
| COG1629P:Outer membrane receptor proteins, mostly Fe transport                                                | 0.764                                             | 0.553                                               | 1.057                                               | 1.082                                               |
| COG2801L:Transposase and inactivated derivatives                                                              | 0.334                                             | 0.438                                               | 0.275                                               | 0.423                                               |
| COG3436L:Transposase and inactivated derivatives                                                              | 0.191                                             | 0.415                                               | 0.093                                               | 0.072                                               |
| COG0841V:Cation/multidrug efflux pump                                                                         | 0.43                                              | 0.384                                               | 0.6                                                 | 0.616                                               |
| COG0745TK:Response regulators consisting of a CheY-like receiver domain and a winged-helix DNA-binding domain | 0.501                                             | 0.361                                               | 0.423                                               | 0.545                                               |
| COG0582L:Integrase                                                                                            | 0.477                                             | 0.353                                               | 0.192                                               | 0.566                                               |
| COG0845M:Membrane-fusion protein                                                                              | 0.167                                             | 0.346                                               | 0.472                                               | 0.43                                                |
| COG0840NT:Methyl-accepting chemotaxis protein                                                                 | 1.026                                             | 0.33                                                | 0.492                                               | 0.538                                               |
| COG1012C:NAD-dependent aldehyde dehydrogenases                                                                | 0.931                                             | 0.307                                               | 0.59                                                | 0.667                                               |
| COG1538MU:Outer membrane protein                                                                              | 0.621                                             | 0.3                                                 | 0.354                                               | 0.366                                               |
| COG0784T:FOG: CheY-like receiver                                                                              | 0.406                                             | 0.284                                               | 0.172                                               | 0.409                                               |
| COG0553KL:Superfamily II DNA/RNA helicases, SNF2 family                                                       | 0.239                                             | 0.277                                               | 0.088                                               | 0.272                                               |
| COG0673R:Predicted dehydrogenases and related proteins                                                        | 0.095                                             | 0.277                                               | 0.197                                               | 0.036                                               |
| COG3181S:Uncharacterized protein conserved in bacteria                                                        | 0.024                                             | 0.269                                               | 0.703                                               | 0.846                                               |
| COG0438M:Glycosyltransferase                                                                                  | 0.167                                             | 0.254                                               | 0.374                                               | 0.215                                               |
| COG2963L:Transposase and inactivated derivatives                                                              | 0.143                                             | 0.246                                               | 0.093                                               | 0.186                                               |
| COG0596R:Predicted hydrolases or acyltransferases (alpha/beta hydrolase superfamily)                          | 0.597                                             | 0.238                                               | 0.462                                               | 0.423                                               |
| COG0683E:ABC-type branched-chain amino acid transport systems, periplasmic component                          | 0.072                                             | 0.231                                               | 0.536                                               | 0.344                                               |
| COG2207K:AraC-type DNA-binding domain-containing proteins                                                     | 0.382                                             | 0.223                                               | 0.393                                               | 0.516                                               |
| COG0318IQ:Acyl-CoA synthetases (AMP-forming)/AMP-acid ligases II                                              | 0.215                                             | 0.215                                               | 0.379                                               | 0.194                                               |
| COG0526OC:Thiol-disulfide isomerase and thioredoxins                                                          | 0.119                                             | 0.215                                               | 0.152                                               | 0.28                                                |
| COG1373R:Predicted ATPase (AAA+ superfamily)                                                                  | 0                                                 | 0.215                                               | 0.039                                               | 0                                                   |
| COG2199T:FOG: GGDEF domain                                                                                    | 0.358                                             | 0.215                                               | 0.147                                               | 0.294                                               |
| COG3250G:Beta-galactosidase/beta-glucuronidase                                                                | 0                                                 | 0.215                                               | 0.059                                               | 0.014                                               |
| COG0789K:Predicted transcriptional regulators                                                                 | 0.143                                             | 0.207                                               | 0.088                                               | 0.215                                               |

|                                                                                                                     |       |       |       |       |
|---------------------------------------------------------------------------------------------------------------------|-------|-------|-------|-------|
| COG1024I:Enoyl-CoA hydratase/carnithine racemase                                                                    | 0.215 | 0.207 | 0.349 | 0.358 |
| COG3039L:Transposase and inactivated derivatives, IS5 family                                                        | 0.119 | 0.207 | 0.034 | 0.136 |
| COG0625O:Glutathione S-transferase                                                                                  | 0.31  | 0.2   | 0.27  | 0.323 |
| COG0793M:Periplasmic protease                                                                                       | 0.024 | 0.2   | 0.088 | 0.065 |
| COG1131V:ABC-type multidrug transport system, ATPase component                                                      | 0.095 | 0.2   | 0.143 | 0.1   |
| COG2204T:Response regulator containing CheY-like receiver, AAA-type ATPase, and DNA-binding domains                 | 0.286 | 0.2   | 0.211 | 0.136 |
| COG0183I:Acetyl-CoA acetyltransferase                                                                               | 0.191 | 0.192 | 0.344 | 0.165 |
| COG0834ET:ABC-type amino acid transport/signal transduction systems, periplasmic component/domain                   | 0.477 | 0.192 | 0.202 | 0.265 |
| COG0610V:Type I site-specific restriction-modification system, R (restriction) subunit and related helicases        | 0.024 | 0.184 | 0.044 | 0.065 |
| COG0776L:Bacterial nucleoid DNA-binding protein                                                                     | 0.143 | 0.184 | 0.084 | 0.093 |
| COG0286V:Type I restriction-modification system methyltransferase subunit                                           | 0.095 | 0.177 | 0.054 | 0.072 |
| COG2202T:FOG: PAS/PAC domain                                                                                        | 0.43  | 0.177 | 0.113 | 0.194 |
| COG4584L:Transposase and inactivated derivatives                                                                    | 0.191 | 0.177 | 0.074 | 0.093 |
| COG0494LR:NTP pyrophosphohydrolases including oxidative damage repair enzymes                                       | 0.167 | 0.169 | 0.088 | 0.158 |
| COG3696P:Putative silver efflux pump                                                                                | 0.334 | 0.169 | 0.172 | 0.172 |
| COG0209F:Ribonucleotide reductase, alpha subunit                                                                    | 0.048 | 0.161 | 0.098 | 0.05  |
| COG0664T:cAMP-binding proteins - catabolite gene activator and regulatory subunit of cAMP-dependent protein kinases | 0.072 | 0.161 | 0.202 | 0.108 |
| COG1484L:DNA replication protein                                                                                    | 0.119 | 0.161 | 0.074 | 0.072 |
| COG2010C:Cytochrome c, mono- and diheme variants                                                                    | 0.072 | 0.161 | 0.093 | 0.179 |
| COG0210L:Superfamily I DNA and RNA helicases                                                                        | 0.286 | 0.154 | 0.093 | 0.158 |
| COG0366G:Glycosidases                                                                                               | 0.072 | 0.154 | 0.074 | 0.065 |
| COG0463M:Glycosyltransferases involved in cell wall biogenesis                                                      | 0.095 | 0.154 | 0.251 | 0.143 |
| COG0515RTKL:Serine/threonine protein kinase                                                                         | 0.072 | 0.154 | 0.064 | 0.136 |
| COG0050J:GTPases - translation elongation factors                                                                   | 0.286 | 0.146 | 0.084 | 0.065 |
| COG0451MG:Nucleoside-diphosphate-sugar epimerases                                                                   | 0.191 | 0.146 | 0.251 | 0.129 |
| COG0543HC:2-polyprenylphenol hydroxylase and related flavodoxin oxidoreductases                                     | 0.239 | 0.146 | 0.064 | 0.108 |
| COG0732V:Restriction endonuclease S subunits                                                                        | 0.024 | 0.146 | 0.044 | 0.086 |
| COG1136V:ABC-type antimicrobial peptide transport system, ATPase component                                          | 0.072 | 0.146 | 0.093 | 0.057 |
| COG3464L:Transposase and inactivated derivatives                                                                    | 0.095 | 0.146 | 0.039 | 0.036 |
| COG3547L:Transposase and inactivated derivatives                                                                    | 0.143 | 0.146 | 0.044 | 0.057 |
| COG0277C:FAD/FMN-containing dehydrogenases                                                                          | 0.119 | 0.138 | 0.211 | 0.308 |
| COG0643NT:Chemotaxis protein histidine kinase and related kinases                                                   | 0.167 | 0.138 | 0.044 | 0.1   |
| COG0330O:Membrane protease subunits, stomatin/prohibitin homologs                                                   | 0.263 | 0.131 | 0.138 | 0.108 |
| COG0559E:Branched-chain amino acid ABC-type transport system, permease components                                   | 0.048 | 0.131 | 0.315 | 0.194 |

|                                                                                                            |       |       |       |       |
|------------------------------------------------------------------------------------------------------------|-------|-------|-------|-------|
| COG0697GER:Permeases of the drug/metabolite transporter (DMT) superfamily                                  | 0.263 | 0.131 | 0.29  | 0.244 |
| COG2197TK:Response regulator containing a CheY-like receiver domain and an HTH DNA-binding domain          | 0.143 | 0.131 | 0.374 | 0.251 |
| COG3344L:Retron-type reverse transcriptase                                                                 | 0.191 | 0.131 | 0.015 | 0.079 |
| COG3507G:Beta-xylosidase                                                                                   | 0     | 0.131 | 0.034 | 0.029 |
| COG4638PR:Phenylpropionate dioxygenase and related ring-hydroxylating dioxygenases, large terminal subunit | 0.31  | 0.131 | 0.177 | 0.158 |
| COG0057G:Glyceraldehyde-3-phosphate dehydrogenase/erythrose-4-phosphate dehydrogenase                      | 0.263 | 0.123 | 0.049 | 0.079 |
| COG0265O:Trypsin-like serine proteases, typically periplasmic, contain C-terminal PDZ domain               | 0.024 | 0.123 | 0.162 | 0.079 |
| COG1002V:Type II restriction enzyme, methylase subunits                                                    | 0.024 | 0.123 | 0.025 | 0.072 |
| COG2003L:DNA repair proteins                                                                               | 0.048 | 0.123 | 0.064 | 0.129 |
| COG3177S:Uncharacterized conserved protein                                                                 | 0.048 | 0.123 | 0.034 | 0.036 |
| COG0624E:Acetylornithine deacetylase/Succinyl-diaminopimelate desuccinylase and related deacylases         | 0.143 | 0.115 | 0.241 | 0.151 |
| COG0635H:Coproporphyrinogen III oxidase and related Fe-S oxidoreductases                                   | 0.095 | 0.115 | 0.049 | 0.086 |
| COG0665E:Glycine/D-amino acid oxidases (deaminating)                                                       | 0.215 | 0.115 | 0.236 | 0.272 |
| COG0668M:Small-conductance mechanosensitive channel                                                        | 0.119 | 0.115 | 0.029 | 0.115 |
| COG0826O:Collagenase and related proteases                                                                 | 0.072 | 0.115 | 0.044 | 0.029 |
| COG1846K:Transcriptional regulators                                                                        | 0.072 | 0.115 | 0.226 | 0.129 |
| COG2826L:Transposase and inactivated derivatives, IS30 family                                              | 0.143 | 0.115 | 0.025 | 0.086 |
| COG0334E:Glutamate dehydrogenase/leucine dehydrogenase                                                     | 0.048 | 0.108 | 0.02  | 0.065 |
| COG0443O:Molecular chaperone                                                                               | 0.263 | 0.108 | 0.162 | 0.065 |
| COG0534V:Na <sup>+</sup> -driven multidrug efflux pump                                                     | 0.095 | 0.108 | 0.044 | 0.043 |
| COG0835NT:Chemotaxis signal transduction protein                                                           | 0.191 | 0.108 | 0.044 | 0.1   |
| COG1092R:Predicted SAM-dependent methyltransferases                                                        | 0.095 | 0.108 | 0.034 | 0.05  |
| COG1192D:ATPases involved in chromosome partitioning                                                       | 0.048 | 0.108 | 0.152 | 0.222 |
| COG3335L:Transposase and inactivated derivatives                                                           | 0.095 | 0.108 | 0.044 | 0.007 |
| COG4177E:ABC-type branched-chain amino acid transport system, permease component                           | 0.024 | 0.108 | 0.241 | 0.186 |
| COG0084L:Mg-dependent DNase                                                                                | 0.024 | 0.1   | 0.029 | 0.057 |
| COG0085K:DNA-directed RNA polymerase, beta subunit/140 kD subunit                                          | 0.263 | 0.1   | 0.147 | 0.129 |
| COG0348C:Polyferredoxin                                                                                    | 0.072 | 0.1   | 0.029 | 0.079 |
| COG0410E:ABC-type branched-chain amino acid transport systems, ATPase component                            | 0.072 | 0.1   | 0.211 | 0.115 |
| COG0458EF:Carbamoylphosphate synthase large subunit (split gene in MJ)                                     | 0.215 | 0.1   | 0.093 | 0.043 |
| COG0621J:2-methylthioadenine synthetase                                                                    | 0.143 | 0.1   | 0.103 | 0.043 |
| COG0810M:Periplasmic protein TonB, links inner and outer membranes                                         | 0.024 | 0.1   | 0.059 | 0.122 |
| COG1752R:Predicted esterase of the alpha-beta hydrolase superfamily                                        | 0.024 | 0.1   | 0.074 | 0.029 |
| COG4147R:Predicted symporter                                                                               | 0.048 | 0.1   | 0.034 | 0.065 |



|                                                                                                                                                                          |       |       |       |       |
|--------------------------------------------------------------------------------------------------------------------------------------------------------------------------|-------|-------|-------|-------|
| COG4775M:Outer membrane protein/protective antigen OMA87                                                                                                                 | 0.048 | 0.1   | 0.059 | 0.029 |
| COG0028EH:Thiamine pyrophosphate-requiring enzymes [acetolactate synthase, pyruvate dehydrogenase (cytochrome), glyoxylate carboligase, phosphonopyruvate decarboxylase] | 0.143 | 0.092 | 0.143 | 0.208 |
| COG0060J:Isoleucyl-tRNA synthetase                                                                                                                                       | 0.095 | 0.092 | 0.074 | 0.029 |
| COG0156H:7-keto-8-aminopelargonate synthetase and related enzymes                                                                                                        | 0.024 | 0.092 | 0.059 | 0.029 |
| COG0174E:Glutamine synthetase                                                                                                                                            | 0.286 | 0.092 | 0.069 | 0.057 |
| COG0249L:Mismatch repair ATPase (MutS family)                                                                                                                            | 0     | 0.092 | 0.059 | 0.029 |
| COG0550L:Topoisomerase IA                                                                                                                                                | 0.119 | 0.092 | 0.044 | 0.136 |
| COG0629L:Single-stranded DNA-binding protein                                                                                                                             | 0     | 0.092 | 0.049 | 0.129 |
| COG1414K:Transcriptional regulator                                                                                                                                       | 0.119 | 0.092 | 0.192 | 0.251 |
| COG1479S:Uncharacterized conserved protein                                                                                                                               | 0.024 | 0.092 | 0.025 | 0.043 |
| COG1804C:Predicted acyl-CoA transferases/carnitine dehydratase                                                                                                           | 0.048 | 0.092 | 0.241 | 0.165 |
| COG2200T:FOG: EAL domain                                                                                                                                                 | 0.31  | 0.092 | 0.059 | 0.122 |
| COG2890J:Methylase of polypeptide chain release factors                                                                                                                  | 0.095 | 0.092 | 0.034 | 0.108 |
| COG4206H:Outer membrane cobalamin receptor protein                                                                                                                       | 0.048 | 0.092 | 0.025 | 0.029 |
| COG4644L:Transposase and inactivated derivatives, TnpA family                                                                                                            | 0.31  | 0.092 | 0.059 | 0.108 |
| COG0402FR:Cytosine deaminase and related metal-dependent hydrolases                                                                                                      | 0.215 | 0.085 | 0.074 | 0.1   |
| COG0612R:Predicted Zn-dependent peptidases                                                                                                                               | 0.119 | 0.085 | 0.143 | 0.036 |
| COG1082G:Sugar phosphate isomerases/epimerases                                                                                                                           | 0.143 | 0.085 | 0.069 | 0.036 |
| COG1475K:Predicted transcriptional regulators                                                                                                                            | 0.072 | 0.085 | 0.167 | 0.201 |
| COG1522K:Transcriptional regulators                                                                                                                                      | 0.191 | 0.085 | 0.172 | 0.115 |
| COG1609K:Transcriptional regulators                                                                                                                                      | 0.048 | 0.085 | 0.241 | 0.108 |
| COG0069E:Glutamate synthase domain 2                                                                                                                                     | 0.143 | 0.077 | 0.049 | 0.065 |
| COG0082E:Chorismate synthase                                                                                                                                             | 0.119 | 0.077 | 0.025 | 0.043 |
| COG0365I:Acyl-coenzyme A synthetases/AMP-(fatty) acid ligases                                                                                                            | 0.167 | 0.077 | 0.177 | 0.115 |
| COG0569P:K+ transport systems, NAD-binding component                                                                                                                     | 0.024 | 0.077 | 0.02  | 0.014 |
| COG0715P:ABC-type nitrate/sulfonate/bicarbonate transport systems, periplasmic components                                                                                | 0.095 | 0.077 | 0.177 | 0.129 |
| COG0798P:Arsenite efflux pump ACR3 and related permeases                                                                                                                 | 0.048 | 0.077 | 0.025 | 0.036 |
| COG1062C:Zn-dependent alcohol dehydrogenases, class III                                                                                                                  | 0.072 | 0.077 | 0.039 | 0.108 |
| COG1236J:Predicted exonuclease of the beta-lactamase fold involved in RNA processing                                                                                     | 0.024 | 0.077 | 0.044 | 0.1   |
| COG1289S:Predicted membrane protein                                                                                                                                      | 0.048 | 0.077 | 0.034 | 0.108 |
| COG1555L:DNA uptake protein and related DNA-binding proteins                                                                                                             | 0.024 | 0.077 | 0.025 | 0.022 |
| COG1974KT:SOS-response transcriptional repressors (RecA-mediated autopeptidases)                                                                                         | 0     | 0.077 | 0.025 | 0.093 |
| COG2378K:Predicted transcriptional regulator                                                                                                                             | 0.048 | 0.077 | 0.044 | 0.1   |

|                                                                                                                                                      |       |       |       |       |
|------------------------------------------------------------------------------------------------------------------------------------------------------|-------|-------|-------|-------|
| COG2823R:Predicted periplasmic or secreted lipoprotein                                                                                               | 0.143 | 0.077 | 0.054 | 0.036 |
| COG0288P:Carbonic anhydrase                                                                                                                          | 0.119 | 0.069 | 0.039 | 0.036 |
| COG0465O:ATP-dependent Zn proteases                                                                                                                  | 0.167 | 0.069 | 0.059 | 0.043 |
| COG0469G:Pyruvate kinase                                                                                                                             | 0.143 | 0.069 | 0.039 | 0.029 |
| COG0520E:Selenocysteine lyase                                                                                                                        | 0.143 | 0.069 | 0.044 | 0.079 |
| COG0617J:tRNA nucleotidyltransferase/poly(A) polymerase                                                                                              | 0.167 | 0.069 | 0.059 | 0.05  |
| COG1047O:FKBP-type peptidyl-prolyl cis-trans isomerases 2                                                                                            | 0.095 | 0.069 | 0.025 | 0.036 |
| COG1826U:Sec-independent protein secretion pathway components                                                                                        | 0.024 | 0.069 | 0.02  | 0.05  |
| COG0005F:Purine nucleoside phosphorylase                                                                                                             | 0.024 | 0.061 | 0.02  | 0.014 |
| COG0179Q:2-keto-4-pentenoate hydratase/2-oxohepta-3-ene-1,7-dioic acid hydratase (catechol pathway)                                                  | 0.072 | 0.061 | 0.167 | 0.143 |
| COG0329EM:Dihydrodipicolinate synthase/N-acetylneuraminase lyase                                                                                     | 0.095 | 0.061 | 0.138 | 0.115 |
| COG0392S:Predicted integral membrane protein                                                                                                         | 0.048 | 0.061 | 0.02  | 0.029 |
| COG0503F:Adenine/guanine phosphoribosyltransferases and related PRPP-binding proteins                                                                | 0     | 0.061 | 0.02  | 0.022 |
| COG0763M:Lipid A disaccharide synthetase                                                                                                             | 0.024 | 0.061 | 0.02  | 0.029 |
| COG1066O:Predicted ATP-dependent serine protease                                                                                                     | 0.048 | 0.061 | 0.02  | 0.043 |
| COG1167KE:Transcriptional regulators containing a DNA-binding HTH domain and an aminotransferase domain (MocR family) and their eukaryotic orthologs | 0.31  | 0.061 | 0.206 | 0.215 |
| COG1197LK:Transcription-repair coupling factor (superfamily II helicase)                                                                             | 0.119 | 0.061 | 0.128 | 0.043 |
| COG1230P:Co/Zn/Cd efflux system component                                                                                                            | 0.072 | 0.061 | 0.049 | 0.108 |
| COG1250I:3-hydroxyacyl-CoA dehydrogenase                                                                                                             | 0.191 | 0.061 | 0.157 | 0.129 |
| COG1352NT:Methylase of chemotaxis methyl-accepting proteins                                                                                          | 0.167 | 0.061 | 0.049 | 0.093 |
| COG1651O:Protein-disulfide isomerase                                                                                                                 | 0.024 | 0.061 | 0.054 | 0.129 |
| COG1825J:Ribosomal protein L25 (general stress protein Ctc)                                                                                          | 0.048 | 0.061 | 0.02  | 0.022 |
| COG3279KT:Response regulator of the LytR/AlgR family                                                                                                 | 0.024 | 0.061 | 0.202 | 0.029 |
| COG3971Q:2-keto-4-pentenoate hydratase                                                                                                               | 0.048 | 0.061 | 0.025 | 0.086 |
| COG4942D:Membrane-bound metallopeptidase                                                                                                             | 0.024 | 0.061 | 0.02  | 0.029 |
| COG0046F:Phosphoribosylformylglycinamide (FGAM) synthase, synthetase domain                                                                          | 0.143 | 0.054 | 0.049 | 0.057 |
| COG0047F:Phosphoribosylformylglycinamide (FGAM) synthase, glutamine amidotransferase domain                                                          | 0.119 | 0.054 | 0.034 | 0.057 |
| COG0150F:Phosphoribosylaminoimidazole (AIR) synthetase                                                                                               | 0.095 | 0.054 | 0.025 | 0.057 |
| COG0154J:Asp-tRNA <sup>Asn</sup> /Glu-tRNA <sup>Gln</sup> amidotransferase A subunit and related amidases                                            | 0.119 | 0.054 | 0.162 | 0.179 |
| COG0456R:Acetyltransferases                                                                                                                          | 0.095 | 0.054 | 0.025 | 0.036 |
| COG0460E:Homoserine dehydrogenase                                                                                                                    | 0.024 | 0.054 | 0.02  | 0.065 |
| COG0693R:Putative intracellular protease/amidase                                                                                                     | 0.024 | 0.054 | 0.064 | 0.129 |
| COG0751J:Glycyl-tRNA synthetase, beta subunit                                                                                                        | 0.143 | 0.054 | 0.054 | 0.022 |

|                                                                                                                   |       |       |       |       |
|-------------------------------------------------------------------------------------------------------------------|-------|-------|-------|-------|
| COG0753P:Catalase                                                                                                 | 0.167 | 0.054 | 0.054 | 0.1   |
| COG1404O:Subtilisin-like serine proteases                                                                         | 0.072 | 0.054 | 0.084 | 0.165 |
| COG1529C:Aerobic-type carbon monoxide dehydrogenase, large subunit CoxL/CutL homologs                             | 0.095 | 0.054 | 0.123 | 0.057 |
| COG1593G:TRAP-type C4-dicarboxylate transport system, large permease component                                    | 0.072 | 0.054 | 0.143 | 0.086 |
| COG1734T:DnaK suppressor protein                                                                                  | 0.048 | 0.054 | 0.034 | 0.093 |
| COG1802K:Transcriptional regulators                                                                               | 0.167 | 0.054 | 0.187 | 0.129 |
| COG1894C:NADH:ubiquinone oxidoreductase, NADH-binding (51 kD) subunit                                             | 0.048 | 0.054 | 0.034 | 0.086 |
| COG2201NT:Chemotaxis response regulator containing a CheY-like receiver domain and a methylesterase domain        | 0.167 | 0.054 | 0.074 | 0.093 |
| COG2303E:Choline dehydrogenase and related flavoproteins                                                          | 0.048 | 0.054 | 0.108 | 0.129 |
| COG3311K:Predicted transcriptional regulator                                                                      | 0.024 | 0.054 | 0.02  | 0.079 |
| COG3706T:Response regulator containing a CheY-like receiver domain and a GGDEF domain                             | 0.143 | 0.054 | 0.029 | 0.108 |
| COG0112E:Glycine/serine hydroxymethyltransferase                                                                  | 0.215 | 0.046 | 0.069 | 0.043 |
| COG0531E:Amino acid transporters                                                                                  | 0.239 | 0.046 | 0.157 | 0.1   |
| COG1020Q:Non-ribosomal peptide synthetase modules and related proteins                                            | 0.286 | 0.046 | 0.162 | 0.129 |
| COG1049C:Aconitase B                                                                                              | 0.048 | 0.046 | 0.034 | 0.122 |
| COG1335Q:Amidases related to nicotinamidase                                                                       | 0.119 | 0.046 | 0.147 | 0.108 |
| COG1570L:Exonuclease VII, large subunit                                                                           | 0.143 | 0.046 | 0.025 | 0.029 |
| COG2373R:Large extracellular alpha-helical protein                                                                | 0.119 | 0.046 | 0.133 | 0.057 |
| COG3203M:Outer membrane protein (porin)                                                                           | 0     | 0.046 | 0.118 | 0.108 |
| COG3264M:Small-conductance mechanosensitive channel                                                               | 0.167 | 0.046 | 0.01  | 0.029 |
| COG3451U:Type IV secretory pathway, VirB4 components                                                              | 0.072 | 0.046 | 0.098 | 0.337 |
| COG3481R:Predicted HD-superfamily hydrolase                                                                       | 0     | 0.046 | 0.015 | 0.136 |
| COG0151F:Phosphoribosylamine-glycine ligase                                                                       | 0.095 | 0.038 | 0.025 | 0.029 |
| COG0190H:5,10-methylene-tetrahydrofolate dehydrogenase/Methenyl tetrahydrofolate cyclohydrolase                   | 0.095 | 0.038 | 0.02  | 0.029 |
| COG0196H:FAD synthase                                                                                             | 0.119 | 0.038 | 0.029 | 0.029 |
| COG0251J:Putative translation initiation inhibitor, yjgF family                                                   | 0.072 | 0.038 | 0.108 | 0.115 |
| COG0399M:Predicted pyridoxal phosphate-dependent enzyme apparently involved in regulation of cell wall biogenesis | 0.024 | 0.038 | 0.093 | 0.029 |
| COG0471P:Di- and tricarboxylate transporters                                                                      | 0     | 0.038 | 0.02  | 0.065 |
| COG0507L:ATP-dependent exoDNase (exonuclease V), alpha subunit - helicase superfamily I member                    | 0     | 0.038 | 0.103 | 0.086 |
| COG0601EP:ABC-type dipeptide/oligopeptide/nickel transport systems, permease components                           | 0.024 | 0.038 | 0.143 | 0.151 |
| COG0747E:ABC-type dipeptide transport system, periplasmic component                                               | 0.095 | 0.038 | 0.246 | 0.222 |
| COG1670J:Acetyltransferases, including N-acetylases of ribosomal proteins                                         | 0.072 | 0.038 | 0.113 | 0.079 |
| COG1966T:Carbon starvation protein, predicted membrane protein                                                    | 0.095 | 0.038 | 0.02  | 0.022 |
| COG2165NU:Type II secretory pathway, pseudopilin PulG                                                             | 0     | 0.038 | 0.025 | 0.072 |

|                                                                                                            |       |       |       |       |
|------------------------------------------------------------------------------------------------------------|-------|-------|-------|-------|
| COG3842E:ABC-type spermidine/putrescine transport systems, ATPase components                               | 0.119 | 0.038 | 0.103 | 0.079 |
| COG4569Q:Acetaldehyde dehydrogenase (acetylating)                                                          | 0.119 | 0.038 | 0.015 | 0.029 |
| COG4948MR:L-alanine-DL-glutamate epimerase and related enzymes of enolase superfamily                      | 0.119 | 0.038 | 0.143 | 0.079 |
| COG4977K:Transcriptional regulator containing an amidase domain and an AraC-type DNA-binding HTH domain    | 0.191 | 0.038 | 0.064 | 0.079 |
| COG0308E:Aminopeptidase N                                                                                  | 0.119 | 0.031 | 0.123 | 0.043 |
| COG0439I:Biotin carboxylase                                                                                | 0.119 | 0.031 | 0.025 | 0.072 |
| COG0765E:ABC-type amino acid transport system, permease component                                          | 0.119 | 0.031 | 0.202 | 0.136 |
| COG0807H:GTP cyclohydrolase II                                                                             | 0.095 | 0.031 | 0.025 | 0.029 |
| COG0843C:Heme/copper-type cytochrome/quinol oxidases, subunit 1                                            | 0.143 | 0.031 | 0.108 | 0.129 |
| COG1171E:Threonine dehydratase                                                                             | 0.072 | 0.031 | 0.103 | 0.072 |
| COG1304C:L-lactate dehydrogenase (FMN-dependent) and related alpha-hydroxy acid dehydrogenases             | 0     | 0.031 | 0.113 | 0.072 |
| COG1305E:Transglutaminase-like enzymes, putative cysteine proteases                                        | 0.048 | 0.031 | 0.074 | 0.093 |
| COG1322S:Uncharacterized protein conserved in bacteria                                                     | 0.095 | 0.031 | 0.02  | 0.029 |
| COG1391OT:Glutamine synthetase adenylyltransferase                                                         | 0.119 | 0.031 | 0.039 | 0.057 |
| COG1450NU:Type II secretory pathway, component PulD                                                        | 0.024 | 0.031 | 0.02  | 0.072 |
| COG1653G:ABC-type sugar transport system, periplasmic component                                            | 0     | 0.031 | 0.098 | 0.079 |
| COG1737K:Transcriptional regulators                                                                        | 0.119 | 0.031 | 0.059 | 0.043 |
| COG1793L:ATP-dependent DNA ligase                                                                          | 0.119 | 0.031 | 0.044 | 0.065 |
| COG1807M:4-amino-4-deoxy-L-arabinose transferase and related glycosyltransferases of PMT family            | 0     | 0.031 | 0.088 | 0.065 |
| COG2124Q:Cytochrome P450                                                                                   | 0.095 | 0.031 | 0.025 | 0.022 |
| COG2234R:Predicted aminopeptidases                                                                         | 0.119 | 0.031 | 0.069 | 0.072 |
| COG2274V:ABC-type bacteriocin/lantibiotic exporters, contain an N-terminal double-glycine peptidase domain | 0.048 | 0.031 | 0.098 | 0.022 |
| COG3523S:Uncharacterized protein conserved in bacteria                                                     | 0.143 | 0.031 | 0.098 | 0.029 |
| COG4993G:Glucose dehydrogenase                                                                             | 0.048 | 0.031 | 0.059 | 0.093 |
| COG0702MG:Predicted nucleoside-diphosphate-sugar epimerases                                                | 0.024 | 0.023 | 0.108 | 0.043 |
| COG2894D:Septum formation inhibitor-activating ATPase                                                      | 0.095 | 0.023 | 0.025 | 0.043 |
| COG2931Q:RTX toxins and related Ca <sup>2+</sup> -binding proteins                                         | 0.597 | 0.023 | 0.369 | 0.136 |
| COG3459G:Cellobiose phosphorylase                                                                          | 0.119 | 0.023 | 0.025 | 0.057 |
| COG4585T:Signal transduction histidine kinase                                                              | 0.024 | 0.023 | 0.138 | 0.065 |
| COG5001T:Predicted signal transduction protein containing a membrane domain, an EAL and a GGDEF domain     | 0.191 | 0.023 | 0.025 | 0.086 |
| COG0270L:Site-specific DNA methylase                                                                       | 0.048 | 0.015 | 0.034 | 0.086 |
| COG1113E:Gamma-aminobutyrate permease and related permeases                                                | 0.072 | 0.015 | 0.02  | 0.079 |
| COG2766T:Putative Ser protein kinase                                                                       | 0.119 | 0.015 | 0.02  | 0.029 |
| COG3209M:Rhs family protein                                                                                | 0.334 | 0.015 | 0.197 | 0.036 |

|                                                                                     |       |       |       |       |
|-------------------------------------------------------------------------------------|-------|-------|-------|-------|
| COG3210U:Large exoproteins involved in heme utilization or adhesion                 | 0.143 | 0.015 | 0.133 | 0.294 |
| COG3419NU:Tfp pilus assembly protein, tip-associated adhesin PilY1                  | 0.024 | 0.015 | 0.02  | 0.072 |
| COG4773P:Outer membrane receptor for ferric coprogen and ferric-rhodotorulic acid   | 0.143 | 0.015 | 0.034 | 0.093 |
| COG2113E:ABC-type proline/glycine betaine transport systems, periplasmic components | 0.167 | 0.008 | 0.029 | 0.014 |
| COG2831U:Hemolysin activation/secretion protein                                     | 0.143 | 0.008 | 0.044 | 0.072 |
| COG3285L:Predicted eukaryotic-type DNA primase                                      | 0.095 | 0.008 | 0.02  | 0.036 |
| COG3501S:Uncharacterized protein conserved in bacteria                              | 0.263 | 0.008 | 0.069 | 0.136 |

<sup>1</sup>COG category in included: A (RNA processing and modification), B (Chromatin structure and dynamics), C (Energy production and conversion), D (Cell cycle control and mitosis), E (Amino acid metabolism and transport), F (Nucleotide metabolism and transport), G (Carbohydrate metabolism and transport), H (Coenzyme metabolism), I (Lipid metabolism), J (Translation), K (Transcription), L (Replication and repair), M (Cell wall/membrane/envelop biogenesis), N (Cell otility), O (Post-translational modification, protein turnover, chaperone functions), Q (Secondary structure), T (Signal transduction), U (Intracellular trafficking and secretion), Y (Nuclear structure), Z (Cytoskeleton), R (General function prediction only) and S (Function unknown).

<sup>2</sup>Percentage was calculated based on the total number of genes per COG for a given metagenome, as indicated in Pannel (A), and the total number of genes indicated in Table S3: 5211 (for N), 21130 (for Nbs), 27124 (for CN1) and 18391 (for CN2).

**Table S5** List of enzymes found to contribute to the major aromatics aerobic degradation pathways via di- and trihydroxylated intermediates identified in the metagenomes of samples N, Nbs, CN1 and CN2.

(A) CN1 enzymes features

| List of unique proteins <sup>1</sup> | Phylogeny <sup>2</sup>                                | ORF <sup>1</sup> | Contig <sup>1</sup> | FAMILY <sup>3</sup>                | SUBFAMILY <sup>3</sup>                                            | BEST HITS <sup>4</sup>                                        |
|--------------------------------------|-------------------------------------------------------|------------------|---------------------|------------------------------------|-------------------------------------------------------------------|---------------------------------------------------------------|
| CN1-1 = CN2-1                        | <i>Betaproteobacteria</i><br>( <i>Achromobacter</i> ) | CN1/10033        | CN1contig06710      | Rieske ferredoxin                  | Naphthalene dioxygenase U2 /Salicylate 5-hydroxylase              | 100% <i>Ralstonia</i> sp. U2 (AAD12609)                       |
|                                      |                                                       | CN1/10034        | CN1contig06710      | Rieske alpha                       | Naphthalene dioxygenase ( <i>Proteobacteria</i> -like)            | 99% <i>Ralstonia</i> sp. U2 (AAD12610)                        |
|                                      |                                                       | CN1/21052        | CN1contig15209      | Rieske beta                        | Naphthalene dioxygenase                                           | 89% <i>Ralstonia</i> sp. U2 (AP12611)                         |
|                                      |                                                       | CN1/21053        | CN1contig15209      | Rieske alpha                       | Naphthalene dioxygenase ( <i>Proteobacteria</i> -like)            | 98% <i>Ralstonia</i> sp. U2 (AP12610)                         |
| CN1-2                                | <i>Betaproteobacteria</i><br>( <i>Achromobacter</i> ) | CN1/11872        | CN1contig08008      | Rieske ferredoxin                  | Naphthalene dioxygenase/salicylate 5-hydroxylase                  | 100% <i>Ralstonia</i> sp. U2 (AAD12606)                       |
| CN1-3                                | <i>Alphaproteobacteria</i><br>( <i>Azospirillum</i> ) | CN1/3872         | CN1contig02509      | Cupin                              | Gentisate dioxygenase                                             | 53% <i>Ralstonia</i> sp. U2 (AAD12619)                        |
| CN1-4 = CN2-19                       | <i>Betaproteobacteria</i><br>( <i>Achromobacter</i> ) | CN1/3348         | CN1contig02145      | Cupin                              | Gentisate dioxygenase                                             | 96% <i>Achromobacter piechaudii</i> (ZP_06684540)             |
|                                      |                                                       | CN1/12318        | CN1contig08355      | Cupin                              | Gentisate dioxygenase                                             | 58% <i>Bradyrhizobium</i> sp. BTAi1 (Bbta_7501; YP_001243259) |
| CN1-5 = CN2-18                       | <i>Betaproteobacteria</i><br>( <i>Comamonas</i> )     | CN1/5183         | CN1contig03376      | Cupin                              | Gentisate dioxygenase                                             | 65% <i>Comamonas testosteroni</i> KF-1 (ZP_03542624)          |
|                                      | <i>Betaproteobacteria</i><br>( <i>Comamonas</i> )     | CN1/21802        | CN1contig15797      | Cupin                              | Gentisate dioxygenase                                             | 86% <i>Comamonas testosteroni</i> KF-1 (ZP_03542624)          |
| CN1-6 = CN2-17                       | <i>Betaproteobacteria</i><br>( <i>Achromobacter</i> ) | CN1/5541         | CN1contig03648      | Cupin                              | Gentisate dioxygenase                                             | 100% <i>Ralstonia</i> sp. U2 (AAD12619)                       |
|                                      |                                                       | CN1/6354         | CN1contig04174      | Cupin                              | Gentisate dioxygenase                                             | 100% <i>Ralstonia</i> sp. U2 (AAD12619)                       |
|                                      |                                                       | CN1/23999        | CN1contig17568      | Cupin                              | Gentisate dioxygenase                                             | 100% <i>Ralstonia</i> sp. U2 (AAD12619)                       |
| CN1-7                                | <i>Betaproteobacteria</i><br>( <i>Achromobacter</i> ) | CN1/0487         | CN1contig00295      | Cupin                              | Gentisate dioxygenase                                             | 58% <i>Achromobacter xyloxydans</i> (EGP45942)                |
| CN1-8 = CN2-3                        | <i>Betaproteobacteria</i><br>( <i>Achromobacter</i> ) | CN1/14978        | CN1contig10341      | EXDO                               | Dihydroxynaphthalene dioxygenase                                  | 100% <i>Ralstonia</i> sp. U2 (AP12614)                        |
| CN1-9                                | <i>Alphaproteobacteria</i><br>( <i>Azospirillum</i> ) | CN1/0554         | CN1contig00338      | Other protein families (isomerase) | 2-Hydroxychromene-2-carboxylate isomerase                         | 89% NahD <i>Azospirillum</i> B510 Azl004590 (YP_003447641)    |
| CN1-10                               | <i>Betaproteobacteria</i><br>( <i>Achromobacter</i> ) | CN1/24001        | CN1contig17568      | Other protein families (isomerase) | 2-Hydroxychromene-2-carboxylate isomerase                         | 100% <i>Ralstonia</i> sp. U2 (AAD12617)                       |
| CN1-11                               | <i>Betaproteobacteria</i><br>( <i>Achromobacter</i> ) | CN1/23998        | CN1contig17567      | Other protein families (aldolase)  | trans-o-Hydroxybenzylidenepyruvate hydratase-aldolase             | 99% <i>Ralstonia</i> sp. U2 (AAD12166)                        |
|                                      |                                                       | CN1/24002        | CN1contig17568      | Other protein families (aldolase)  | trans-o-Hydroxybenzylidenepyruvate hydratase-aldolase (NagE-like) | 100% <i>Ralstonia</i> sp. U2 (AAD12616)                       |

|                 |                                                       |             |                          |                                           |                                                                    |                                                        |
|-----------------|-------------------------------------------------------|-------------|--------------------------|-------------------------------------------|--------------------------------------------------------------------|--------------------------------------------------------|
| CN1-12          | <i>Betaproteobacteria</i><br>( <i>Achromobacter</i> ) | CN1/14979   | CN1contig10341           | Other protein families<br>(dehydrogenase) | Salicylaldehyde dehydrogenase                                      | 98% <i>Ralstonia</i> sp. U2 (AAD12613)                 |
| CN1-13          | <i>Betaproteobacteria</i><br>( <i>Achromobacter</i> ) | CN1/5933    | CN1contig03894           | Rieske alpha                              | Salicylate 5-hydroxylase                                           | 96% <i>Ralstonia</i> sp. U2 (AAD12607)                 |
|                 |                                                       | CN1/11871   | CN1contig08008           | Rieske alpha                              | Salicylate 5-hydroxylase                                           | 96% <i>Ralstonia</i> sp. U2 (AAD12607)                 |
|                 |                                                       | CN1/20818   | CN1contig15044           | Rieske alpha                              | Salicylate 5-hydroxylase                                           | 100% <i>Ralstonia</i> sp. U2 (AAD12607)                |
|                 |                                                       | CN1/20821   | CN1contig15047           | Rieske alpha                              | Salicylate 5-hydroxylase                                           | 100% <i>Ralstonia</i> sp. U2 (AAD12607)                |
|                 |                                                       | CN1/26968   | CN1contig20657           | Rieske alpha                              | Salicylate 5-hydroxylase                                           | 98% <i>Ralstonia</i> sp. U2 (AAD12607)                 |
|                 |                                                       | CN1/26969   | CN1contig20658           | Rieske alpha                              | Salicylate 5-hydroxylase                                           | 81% <i>Ralstonia</i> sp. U2 (AAD12607)                 |
|                 |                                                       | CN1/27027   | CN1contig20949           | Rieske alpha                              | Salicylate 5-hydroxylase                                           | 91% <i>Ralstonia</i> sp. U2 (AAD12607)                 |
|                 |                                                       | CN1/10032   | CN1contig06710           | Rieske beta                               | Salicylate 5-hydroxylase                                           | 100% <i>Ralstonia</i> sp. U2 (AAD12608)                |
| CN1/20824       | CN1contig15049                                        | Rieske beta | Salicylate 5-hydroxylase | 78% <i>Ralstonia</i> sp. U2 (AP12608)     |                                                                    |                                                        |
| CN1-14          | <i>Alphaproteobacteria</i><br>( <i>Azospirillum</i> ) | CN1/5223    | CN1contig03408           | Rieske reductase                          | Salicylate 5-hydroxylase                                           | 71% <i>Azospirillum</i> B510 (Azl a9220)               |
|                 |                                                       | CN1/5224    | CN1contig03408           | Rieske ferredoxin                         | Salicylate 5-hydroxylase                                           | 71% <i>Azospirillum</i> B510 (Azl a9190)               |
| CN1-15 = CN2-11 | <i>Betaproteobacteria</i><br>( <i>Achromobacter</i> ) | CN1/5860    | CN1contig03845           | Rieske alpha                              | Salicylate 5-hydroxylase                                           | 98% <i>Achromobacter piechaudii</i> (ZP_06686009)      |
|                 |                                                       | CN1/5861    | CN1contig03845           | Rieske beta                               | Salicylate 5-hydroxylase                                           | 95% <i>Achromobacter piechaudii</i> (ZP_06686008)      |
|                 |                                                       | CN1/5862    | CN1contig03845           | Rieske ferredoxin                         | Salicylate 5-hydroxylase                                           | 93% <i>Achromobacter piechaudii</i> (ZP_06686007)      |
|                 |                                                       | CN1/21472   | CN1contig15525           | Rieske alpha                              | Salicylate 5-hydroxylase                                           | 100% <i>Achromobacter piechaudii</i> (ZP_06686009)     |
| CN1-16 = CN2-13 | <i>Betaproteobacteria</i><br>( <i>Achromobacter</i> ) | CN1/5934    | CN1contig03894           | Rieske beta                               | Salicylate 5-hydroxylase                                           | 73% <i>Polaromonas</i> sp. JS666 (Bpro_09849)          |
|                 |                                                       | CN1/5935    | CN1contig03894           | Rieske ferredoxin                         | Salicylate 5-hydroxylase                                           | 62% <i>Polaromonas</i> sp. JS666 (Bpro_0985)           |
|                 |                                                       | CN1/20819   | CN1contig15045           | Rieske alpha                              | Salicylate 5-hydroxylase                                           | 83% <i>Polaromonas</i> sp. JS666 (Bpro_0983)           |
| CN1-17          | <i>Betaproteobacteria</i><br>( <i>Achromobacter</i> ) | CN1/20820   | CN1contig15046           | Rieske alpha                              | Salicylate 5-hydroxylase                                           | 77% <i>Ralstonia eutropha</i> JMP134 (ReutB4719)       |
| CN1-18          | <i>Alphaproteobacteria</i><br>( <i>Azospirillum</i> ) | CN1/0489    | CN1contig00295           | Other protein families<br>(hydrolase)     | Fumarylpyruvate hydrolase                                          | 81% <i>Azospirillum</i> B510 (Azl a9250)               |
|                 |                                                       | CN1/3873    | CN1contig02509           | Other protein families<br>(hydrolase)     | Fumarylpyruvate hydrolase                                          |                                                        |
| CN1-19          | <i>Betaproteobacteria</i><br>( <i>Achromobacter</i> ) | CN1/3347    | CN1contig02145           | Other protein families<br>(hydrolase)     | Fumarylpyruvate hydrolase                                          | 92% <i>Achromobacter piechaudii</i> (ZP_06684541)      |
| CN1-20          | <i>Betaproteobacteria</i><br>( <i>Comamonas</i> )     | CN1/5182    | CN1contig03376           | Other protein families<br>(hydrolase)     | Fumarylpyruvate hydrolase                                          | 72% <i>Comamonas testosteroni</i> S44 (ZP_07045767)    |
| CN1-21          | <i>Betaproteobacteria</i><br>( <i>Comamonas</i> )     | CN1/6353    | CN1contig04174           | Other protein families<br>(hydrolase)     | Fumarylpyruvate hydrolase                                          | 77% <i>Comamonas testosteroni</i> S44 (YP_0032788219)  |
| CN1-22          | <i>Betaproteobacteria</i><br>( <i>Comamonas</i> )     | CN1/12017   | CN1contig08111           | Flavoprotein<br>monooxygenase             | 3-Hydroxybenzoate 6-<br>hydroxylase                                | 100% <i>Comamonas testosteroni</i> KF-1 (ZP_03541756)  |
| CN1-23          | <i>Betaproteobacteria</i><br>( <i>Achromobacter</i> ) | CN1/18365   | CN1contig12835           | EXDO                                      | 2,3-Dihydroxybiphenyl<br>dioxygenase ( <i>Bacillus</i> -like)      | 57% BphC <i>Bacillus</i> sp. JF8 (Q8GR45)              |
| CN1-24 = CN2-29 | <i>Betaproteobacteria</i><br>( <i>Achromobacter</i> ) | CN1/1576    | CN1contig01024           | Rieske alpha                              | Function unknown (distantly<br>related to benzoate<br>dioxygenase) | 99% <i>Achromobacter piechaudii</i> (ZP_06686030)      |
| CN1-25 = CN2-28 | <i>Betaproteobacteria</i><br>( <i>Achromobacter</i> ) | CN1/22427   | CN1contig16308           | Rieske alpha                              | Function unknown (distantly<br>related to benzoate<br>dioxygenase) | 99% <i>Achromobacter piechaudii</i> (ZP_06685665)      |
| CN1-26          | <i>Betaproteobacteria</i> (genus)                     | CN1/6284    | CN1contig04134           | Other protein families                    | Phenol hydroxylase                                                 | 77% <i>Alicyclophilus denitrificans</i> BC (Alide0326) |

|                 |                                                    |           |                |                                               |                                                        |                                                             |
|-----------------|----------------------------------------------------|-----------|----------------|-----------------------------------------------|--------------------------------------------------------|-------------------------------------------------------------|
|                 | unclear)                                           |           |                |                                               |                                                        |                                                             |
| CN1-27          | <i>Alphaproteobacteria</i> (genus unclear)         | CN1/6610  | CN1contig04340 | EXDO                                          | Catechol 2,3-dioxygenase ( <i>Sphingomonads</i> -like) | 61% <i>Sphingomonas</i> sp. P2 (BAC65437)                   |
|                 |                                                    | CN1/6777  | CN1contig04464 | EXDO                                          | Catechol 2,3-dioxygenase                               |                                                             |
| CN1-28          | <i>Betaproteobacteria</i> (genus unclear)          | CN1/12486 | CN1contig08481 | Flavoprotein monooxygenase                    | 4-Hydroxybenzoate 3-hydroxylase                        | 59% <i>Burkholderia xenovorans</i> LB400 (Bxe_A2040)        |
| CN1-29          | <i>Betaproteobacteria</i> ( <i>Comamonas</i> )     | CN1/13178 | CN1contig08971 | Flavoprotein monooxygenase                    | 4-Hydroxybenzoate 3-hydroxylase                        | 100% <i>Comamonas testosteroni</i> KF-1 (ZP_03543395)       |
|                 |                                                    | CN1/24144 | CN1contig17697 | Flavoprotein monooxygenase                    | 4-Hydroxybenzoate 3-hydroxylase                        | 100% <i>Comamonas testosteroni</i> KF-1 (ZP_03543395)       |
| CN1-30          | <i>Alphaproteobacteria</i> ( <i>Azospirillum</i> ) | CN1/26430 | CN1contig19887 | Flavoprotein monooxygenase                    | 4-Hydroxybenzoate 3-hydroxylase                        | 91% <i>Azospirillum</i> B510 (YP_003452470)                 |
| CN1-31          | <i>Betaproteobacteria</i> ( <i>Comamonas</i> )     | CN1/11127 | CN1contig07470 | Rieske alpha                                  | Vanillate monooxygenase                                | 99% <i>Comamonas testosteroni</i> KF-1 (ZP_03541171)        |
| CN1-32 = CN2-70 | <i>Betaproteobacteria</i> ( <i>Achromobacter</i> ) | CN1/18221 | CN1contig12726 | Rieske alpha                                  | Vanillate monooxygenase                                | 100% <i>Achromobacter xylosoxidans</i> A8 (AXYL02987)       |
| CN1-33          | <i>Alphaproteobacteria</i> ( <i>Azospirillum</i> ) | CN1/5532  | CN1contig03643 | INTRA                                         | Protocatechuate 3,4-dioxygenase beta subunit           | 91% <i>Azospirillum</i> B510 (AzI d00470)                   |
|                 |                                                    | CN1/21609 | CN1contig15627 | INTRA                                         | Protocatechuate 3,4-dioxygenase alpha subunit          | 89% <i>Azospirillum</i> B510 (YP_003452416)                 |
|                 |                                                    | CN1/23374 | CN1contig17041 | INTRA                                         | Protocatechuate 3,4-dioxygenase alpha subunit          | 87% <i>Azospirillum</i> B510 (d00460)                       |
| CN1-34          | <i>Betaproteobacteria</i> ( <i>Achromobacter</i> ) | CN1/4160  | CN1contig02693 | INTRA                                         | Protocatechuate 3,4-dioxygenase beta subunit           | 81% <i>Ralstonia eutropha</i> JMP134 (ReutB5025)            |
|                 |                                                    | CN1/7682  | CN1contig05094 | INTRA                                         | Protocatechuate 3,4-dioxygenase alpha subunit          | 78% <i>Ralstonia eutropha</i> JMP134 (ReutB5024)            |
| CN1-35          | <i>Betaproteobacteria</i> ( <i>Comamonas</i> )     | CN1/18367 | CN1contig12837 | LigB                                          | Protocatechuate 4,5-dioxygenase beta subunit           | 100% <i>Comamonas testosteroni</i> KF-1 (ZP_03542666)       |
|                 |                                                    | CN1/18368 | CN1contig12837 | LigB                                          | Protocatechuate 4,5-dioxygenase alpha subunit          | 100% <i>Comamonas testosteroni</i> KF-1 (ZP_03542665)       |
| CN1-36          | <i>Betaproteobacteria</i> (genus unclear)          | CN1/2889  | CN1contig01853 | LigB                                          | Protocatechuate 4,5-dioxygenase                        | 64% <i>Azoarcus</i> sp. BH72 (YP_934026)                    |
| CN1-37          | <i>Alphaproteobacteria</i> ( <i>Azospirillum</i> ) | CN1/7681  | CN1contig05094 | Other protein families (isomerase)            | Carboxymuconate cycloisomerase                         | 54% <i>Acinetobacter</i> sp. SH024 (ZP_06690230)            |
| CN1-38          | <i>Alphaproteobacteria</i> ( <i>Azospirillum</i> ) | CN1/11990 | CN1contig08096 | Other protein families (reductase)            | Maleylacetate reductase                                | 49% <i>Burkholderia pseudomallei</i> MSHR346 (YP_004330781) |
| CN1-39          | <i>Bacteroidetes</i>                               | CN1/4680  | CN1contig03032 | Other protein families (non-heme dioxygenase) | 4-Hydroxyphenylpyruvate dioxygenase                    | 78% <i>Chitinophaga pinensis</i> (Cpin5420)                 |
|                 |                                                    | CN1/14773 | CN1contig10195 | Other protein families (non-heme dioxygenase) | 4-Hydroxyphenylpyruvate dioxygenase                    | 73% <i>Chitinophaga pinensis</i> (Cpin5420)                 |
| CN1-40 = CN2-57 | <i>Gammaproteobacteria</i> (genus unclear)         | CN1/10673 | CN1contig07168 | Other protein families (non-heme dioxygenase) | 4-Hydroxyphenylpyruvate dioxygenase                    | 83% <i>Stenotrophomonas maltophilia</i> R551-3 (SamI3739)   |
| CN1-41          | <i>Betaproteobacteria</i> ( <i>Comamonas</i> )     | CN1/15465 | CN1contig10702 | Other protein families (non-heme dioxygenase) | 4-Hydroxyphenylpyruvate dioxygenase                    | 100% <i>Comamonas testosteroni</i> KF-1 (ZP_0354115)        |
| CN1-42          | <i>Gammaproteobacteria</i> ( <i>Legionella</i> )   | CN1/21045 | CN1contig15205 | Other protein families (non-heme dioxygenase) | 4-Hydroxyphenylpyruvate dioxygenase                    | 78% <i>Legionella drancourtii</i> LLAP12 (ZP_05110703)      |
| CN1-43          | <i>Alphaproteobacteria</i> ( <i>Azospirillum</i> ) | CN1/21429 | CN1contig15498 | Other protein families (non-heme dioxygenase) | 4-Hydroxyphenylpyruvate dioxygenase                    | 93% <i>Azospirillum</i> B510 (YP_003452613)                 |



|                 |                                                                                   |           |                |                                               |                                                         |                                                          |
|-----------------|-----------------------------------------------------------------------------------|-----------|----------------|-----------------------------------------------|---------------------------------------------------------|----------------------------------------------------------|
| CN1-44          | ORF too short for assigning phylogeny (homology for the 92 AA long fragment <50%) | CN1/24350 | CN1contig17873 | Other protein families (non-heme dioxygenase) | 4-Hydroxyphenylpyruvate dioxygenase                     | 49% <i>Mangifera indica</i> (ADO62712.1)                 |
| CN1-45          | <i>Alphaproteobacteria</i> ( <i>Azospirillum</i> )                                | CN1/0644  | CN1contig00404 | Cupin                                         | Homogentisate dioxygenase                               | 95% <i>Azospirillum</i> B510 (AzI024670)                 |
|                 |                                                                                   | CN1/20618 | CN1contig14896 | Cupin                                         | Homogentisate dioxygenase                               | 94% <i>Azospirillum</i> B510 (YP_003449649)              |
| CN1-46          | <i>Alphaproteobacteria</i> ( <i>Azospirillum</i> )                                | CN1/1252  | CN1contig00814 | Cupin                                         | Homogentisate dioxygenase                               | 95% <i>Azospirillum</i> B510 (AzI024670)                 |
| CN1-47          | <i>Bacteroidetes</i>                                                              | CN1/3844  | CN1contig02492 | Cupin                                         | Homogentisate dioxygenase                               | 81% <i>Chitinophaga pinensis</i> (Cpin5427)              |
| CN1-48          | <i>Gammaproteobacteria</i> ( <i>Pseudoxanthomonas</i> )                           | CN1/14821 | CN1contig10230 | Cupin                                         | Homogentisate dioxygenase                               | 81% <i>Pseudoxanthomonas suwonensis</i> 11-1 (Psesu2515) |
| CN1-49          | <i>Gammaproteobacteria</i> ( <i>Legionella</i> )                                  | CN1/19115 | CN1contig13367 | Cupin                                         | Homogentisate dioxygenase                               | 75% <i>Legionella drancourtii</i> LLAP12 (ZP_05109390)   |
| CN1-50 = CN2-74 | <i>Betaproteobacteria</i> ( <i>Achromobacter</i> )                                | CN1/13083 | CN1contig08896 | LigB                                          | Homoprotocatechuate dioxygenase                         | 90% <i>Achromobacter piechaudii</i> (ZP_06690164)        |
|                 |                                                                                   | CN1/19314 | CN1contig13509 | LigB                                          | Homoprotocatechuate dioxygenase                         | 96% <i>Achromobacter piechaudii</i> (ZP_06690164)        |
| CN1-51          | <i>Betaproteobacteria</i> ( <i>Achromobacter</i> )                                | CN1/0215  | CN1contig00133 | EXDO                                          | 2,3-Dihydroxy-p-cumate dioxygenase                      | 58% <i>Achromobacter xylosoxidans</i> A8 (AXYL_02525)    |
| CN1-52          | <i>Betaproteobacteria</i> (genus unclear)                                         | CN1/1319  | CN1contig00858 | LigB                                          | Polycyclic arene diol extradiol dioxygenase (PhnC-like) | 76% PhnC <i>Burkholderia sartisoli</i> (AAD09870)        |
|                 |                                                                                   | CN1/22639 | CN1contig16483 | LigB                                          | Polycyclic arene diol extradiol dioxygenase (PhnC-like) | 68% PhnC <i>Burkholderia sartisoli</i> (AAD09870)        |
| CN1-53          | <i>Betaproteobacteria</i> (genus unclear)                                         | CN1/2698  | CN1contig01726 | Rieske alpha                                  | Abietane diterpenoid dioxygenase                        | 60% <i>Pseudomonas aeruginosa</i> 2192 (ZP_04934623)     |
|                 |                                                                                   | CN1/19902 | CN1contig14229 | Rieske alpha                                  | Abietane diterpenoid dioxygenase                        | 57% <i>Pseudomonas aeruginosa</i> 2192 (ZP_04934643)     |
|                 |                                                                                   | CN1/2699  | CN1contig01726 | Rieske beta                                   | Abietane diterpenoid dioxygenase                        | 57% <i>Burkholderia xenovorans</i> LB400 (Bxe_C0587)     |
|                 |                                                                                   | CN1/1963  | CN1contig01249 | Rieske beta                                   | Abietane diterpenoid dioxygenase                        | 57% <i>Burkholderia xenovorans</i> LB400 (Bxe_C0587)     |
| CN1-54          | <i>Betaproteobacteria</i> (genus unclear)                                         | CN1/2697  | CN1contig01726 | EXDO                                          | 7-Oxo-11,12-dihydroxydehydroabietic acid dioxygenase    | 78% <i>Pseudomonas aeruginosa</i> 2192 (ZP_04934632)     |
|                 |                                                                                   | CN1/19780 | CN1contig14044 | EXDO                                          | 7-Oxo-11,12-dihydroxydehydroabietic acid dioxygenase    | 73% <i>Pseudomonas aeruginosa</i> 2192 (ZP_04934642)     |
|                 |                                                                                   | CN1/19781 | CN1contig14045 | EXDO                                          | 7-Oxo-11,12-dihydroxydehydroabietic acid dioxygenase    | 73% <i>Pseudomonas aeruginosa</i> 2192 (ZP_04934642)     |
|                 |                                                                                   | CN1/19782 | CN1contig14046 | EXDO                                          | 7-Oxo-11,12-dihydroxydehydroabietic acid dioxygenase    | 70% <i>Pseudomonas aeruginosa</i> 2192 (ZP_04934642)     |
|                 |                                                                                   | CN1/19813 | CN1contig14070 | EXDO                                          | 7-Oxo-11,12-dihydroxydehydroabietic acid dioxygenase    | 73% <i>Pseudomonas aeruginosa</i> 2192 (ZP_04934642)     |
| CN1-55 = CN2-78 | <i>Betaproteobacteria</i> ( <i>Achromobacter</i> )                                | CN1/4264  | CN1contig02763 | LigB                                          | 2-Aminophenol 1,6-dioxygenase                           | 89% <i>Burkholderia xenovorans</i> LB400 (Bxe_A1145)     |
| CN1-56          | <i>Betaproteobacteria</i> ( <i>Comamonas</i> )                                    | CN1/5605  | CN1contig03686 | LigB                                          | 2,3-Dihydroxyphenylpropionate dioxygenase               | 67% <i>Comamonas testosteroni</i> S44 (ZP_07047594)      |

|        |                                                                                                                        |           |                |                                                       |                                                                     |                                                                  |
|--------|------------------------------------------------------------------------------------------------------------------------|-----------|----------------|-------------------------------------------------------|---------------------------------------------------------------------|------------------------------------------------------------------|
| CN1-57 | <i>Betaproteobacteria</i><br>( <i>Comamonas</i> )                                                                      | CN1/9860  | CN1contig06591 | Rieske alpha                                          | Terephthalate dioxygenase                                           | 99% <i>Comamonas testosteroni</i> KF-1 (ZP_03542898)             |
| CN1-58 | <i>Betaproteobacteria</i><br>( <i>Comamonas</i> )                                                                      | CN1/14740 | CN1contig10167 | Flavoprotein<br>monooxygenase                         | 6-Hydroxynicotinate 3-<br>monooxygenase                             | 99% <i>Comamonas testosteroni</i> KF-1 (ZP_03541517)             |
| CN1-59 | <i>Betaproteobacteria</i> (genus<br>unclear)                                                                           | CN1/19559 | CN1contig13684 | Rieske ferredoxin                                     | Function unknown (possibly<br>involved in rhizopine<br>degradation) | 92% <i>Rhizobium etli</i> CIAT894 (ZP_03528797)                  |
| CN1-60 | <i>Gammaproteobacteria</i> (genus<br>unclear)                                                                          | CN1/21845 | CN1contig15836 | Rieske alpha                                          | Dioxygenase (possibly involved<br>in indolacetic acid degradation)  | 80% LacC <i>Pseudomonas fluorescens</i> WH6 (ZP_07775391)        |
| CN1-61 | <i>Betaproteobacteria</i><br>( <i>Comamonas</i> )                                                                      | CN1/6909  | CN1contig04543 | Rieske alpha                                          | Phthalate 4,5-dioxygenase                                           | 100% <i>Comamonas testosteroni</i> CNB-2 (CtCNB1_1488)           |
|        |                                                                                                                        | CN1/18929 | CN1contig13244 | Rieske alpha                                          | Phthalate dioxygenase                                               | 100% <i>Comamonas testosteroni</i> CNB-2 (CtCNB1_1488)           |
| CN1-62 | <i>Betaproteobacteria</i><br>( <i>Comamonas</i> )                                                                      | CN1/11422 | CN1contig07683 | Rieske alpha                                          | Phthalate dioxygenases<br>(Proteobacteria-like)                     | 100% <i>Comamonas testosteroni</i> KF-1 (ZP_03542656)            |
| CN1-63 | <i>Betaproteobacteria</i><br>( <i>Achromobacter</i> )                                                                  | CN1/15660 | CN1contig10837 | Rieske                                                | Phthalate4,5- dioxygenase                                           | 71% <i>Polaromonas</i> sp. JS666( Bpro_19110)                    |
|        |                                                                                                                        | CN1/20322 | CN1contig14660 | Rieske alpha                                          | Phthalate 4,5-dioxygenase                                           | 76% <i>Polaromonas</i> sp. JS666 (Bpro_19110)                    |
| CN1-64 | <i>Betaproteobacteria</i><br>( <i>Achromobacter</i> )                                                                  | CN1/20324 | CN1contig14662 | Rieske alpha                                          | Phthalate 4,5-dioxygenase                                           | 71% <i>Polaromonas</i> sp. JS666 (Bpro_19110)                    |
|        |                                                                                                                        | CN1/20325 | CN1contig14663 | Rieske alpha                                          | Phthalate 4,5-dioxygenase                                           | 72% <i>Polaromonas</i> sp. JS666 (Bpro_19110)                    |
|        |                                                                                                                        | CN1/20327 | CN1contig14665 | Rieske alpha                                          | Phthalate 4,5-dioxygenase                                           | 58% <i>Polaromonas</i> sp. JS666 (Bpro_19110)                    |
|        |                                                                                                                        | CN1/20328 | CN1contig14666 | Rieske alpha                                          | Phthalate 4,5-dioxygenase                                           | 73% <i>Polaromonas</i> sp. JS666 (Bpro_19110)                    |
| CN1-65 | <i>Betaproteobacteria</i> (genus<br>unclear)                                                                           | CN1/6611  | CN1contig04340 | Rieske ferredoxin                                     | XylT ferredoxin                                                     | 58% <i>Alicyclophilus denitrificans</i> BC (Alide0329)           |
| CN1-66 | <i>Betaproteobacteria</i> - ORF too<br>short for assigning phylogeny<br>(homology for the 67 AA long<br>fragment <50%) | CN1/11990 | CN1contig08096 | Other protein families<br>(reductase)                 | Maleylacetate reductase                                             | 49% <i>Burkholderia pseudomallei</i> MSHR346<br>(YP_004330781.1) |
| CN1-67 | <i>Betaproteobacteria</i><br>( <i>Achromobacter</i> )                                                                  | CN1/24000 | CN1contig17568 | Other protein families<br>(Glutathione S transferase) | Glutathione S transferase                                           | 100% <i>Ralstonia</i> sp. U2 (AAD12618)                          |
| CN1-68 | <i>Betaproteobacteria</i> -<br>homology lower than 50%<br>for assigning phylogeny                                      | CN1/22362 | CN1contig16248 | Rieske ferredoxin                                     | Function unknown                                                    | 49% <i>Burkholderia pseudomallei</i> MSHR346<br>(YP_002895688.1) |
|        |                                                                                                                        | CN1/20130 | CN1contig14531 | Rieske alpha                                          | Function unknown                                                    |                                                                  |
| CN1-69 | <i>Betaproteobacteria</i><br>( <i>Achromobacter</i> )                                                                  | CN1/2287  | CN1contig01449 | Flavoprotein<br>monooxygenase                         | Function unknown                                                    | 68% <i>Burkholderia xenovorans</i> LB400 (Bxe_C0213)             |
| CN1-70 | <i>Betaproteobacteria</i><br>( <i>Comamonas</i> )                                                                      | CN1/9936  | CN1contig06646 | INTRA                                                 | Function unknown                                                    | 99% <i>Comamonas testosteroni</i> KF-1 (ZP_03541192)             |
| CN1-71 | Homology lower than 51%<br>for assigning phylogeny                                                                     | CN1/10873 | CN1contig07301 | INTRA                                                 | Function unknown                                                    | 51% <i>Leadbetterella byssophila</i> DSM 17132<br>(YP_003997051) |
| CN1-72 | <i>Betaproteobacteria</i><br>( <i>Achromobacter</i> )                                                                  | CN1/11790 | CN1contig07951 | Rieske alpha                                          | Function unknown                                                    | 99% <i>Achromobacter piechaudii</i> (ZP_06686669)                |
| CN1-73 | ORF too short for assigning<br>phylogeny (homology for the<br>107 AA long fragment 55%)                                | CN1/14160 | CN1contig09716 | INTRA                                                 | Function unknown                                                    | 55% <i>Planctomycesmaris</i> DSM 8797 (ZP_01852244)              |
| CN1-74 | <i>Betaproteobacteria</i> (genus<br>unclear)                                                                           | CN1/15436 | CN1contig10674 | Rieske alpha                                          | Function unknown                                                    | 69% <i>Burkholderia</i> sp. Ch1-1 (ZP_06845959)                  |
| CN1-75 | <i>Bacteroidetes</i>                                                                                                   | CN1/17365 | CN1contig12083 | INTRA                                                 | Function unknown                                                    | 60% <i>Mucilaginibacter paludis</i> (ZP_07746550)                |
| CN1-76 | <i>Betaproteobacteria</i>                                                                                              | CN1/22362 | CN1contig16248 | Rieske ferredoxin                                     | Function unknown                                                    | 59% <i>Burkholderia</i> sp. Ch1-1 (ZP_09823127.1)                |

|        |                                                            |           |                |                    |                           |                                                          |
|--------|------------------------------------------------------------|-----------|----------------|--------------------|---------------------------|----------------------------------------------------------|
|        | ( <i>Achromobacter</i> )                                   |           |                |                    |                           |                                                          |
| CN1-77 | <i>Betaproteobacteria</i><br>( <i>Comamonas</i> )          | CN1/25534 | CN1contig18962 | EXDO               | Function unknown          | 100% <i>Comamonas testosteroni</i> KF-1 (ZP_03546056)    |
| CN1-78 | <i>Alphaproteobacteria</i><br>( <i>Azospirillum</i> )      | CN1/0553  | CN1contig00338 | Response regulator | Response regulator (LysR) | 89% <i>Azospirillum</i> B510 (Azi004580)                 |
| CN1-79 | <i>Betaproteobacteria</i><br>( <i>Achromobacter</i> )      | CN1/1836  | CN1contig01178 | EXDO               | Probably regulator (LysR) | 56% <i>Polaromonas</i> sp. JS666 (Bpro_2710)             |
| CN1-80 | <i>Betaproteobacteria</i><br>( <i>Achromobacter</i> )      | CN1/2307  | CN1contig01467 | EXDO               | Probably regulator (LysR) | 99% <i>Achromobacter piechaudii</i> (ZP_06690047)        |
| CN1-81 | <i>Betaproteobacteria</i><br>( <i>Achromobacter</i> )      | CN1/2375  | CN1contig01511 | EXDO???            | Probably regulator (LysR) | 74% <i>Achromobacter xylosooxidans</i> (AXX-A EGP47715)  |
| CN1-82 | <i>Gammaproteobacteria</i><br>( <i>Pseudoxanthomonas</i> ) | CN1/2582  | CN1contig01649 | EXDO???            | Probably regulator (LysR) | 67% <i>Pseudoxanthomonas suwonensis</i> 11-1 (Psesu1673) |
| CN1-83 | <i>Betaproteobacteria</i><br>( <i>Comamonas</i> )          | CN1/9644  | CN1contig06457 | LigB               | Gallate dioxygenase       | 100% <i>Comamonas testosteroni</i> KF-1 (ZP_03542382)    |

<sup>1</sup>We might have overestimated the number of proteins in our metaproteomes by double counting of the fragmented open reading frames in the meta-sequences that were derived from the same gene/protein. In addition, some of the proteins (i.e. dioxygenases) herein investigated are formed by different subunits, that all together form a single protein. To take both issues into consideration the amino acid sequences of proteins with biochemical functions shown to be potentially involved in biodegradation, as suggested by in-house database-BLAST search, were manually BLAST and aligned to the best protein hit in the database to ensure identification of fragments most likely belonging to the same sequence/protein (see first column; “list of unique proteins”). As example, the protein named CN1-1 (see first column; “list of unique proteins”) represents a single naphthalene dioxygenase that contain most likely alpha, beta and ferredoxin subunits of fragments CN1/10033, CN1/10034, CN1/21052 and CN1/21053 located in different short contigs. The protein ID (ORF) and contig where the gene was found within the pyro-sequences are specifically shown. BLAST alignment was performed between proteins contributing to the major aromatics aerobic degradation pathways found in the different metagenomes. Thus, proteins sharing the same “best hit” and amino acid sequence homology, were specifically indicated; as example, the protein named CN1-1 (see first column; “list of unique proteins”) represent a single naphthalene dioxygenase most similar to CN2-1 naphthalene dioxygenase.

<sup>2</sup>For taxonomic assignment complete genome sequences were obtained from NCBI and used to map the contigs containing the gene coding the protein(s) with biochemical functions shown to be potentially involved in biodegradation.

<sup>3</sup>Functional assignment of the predicted genes involved in degradation was made on the basis of BLASTP analysis against an in-house database that contained gene sequences encoding enzymes that usually perform key catalysing steps in the aerobic degradation of pollutants via di- and trihydroxylated intermediates (**Table S8**). These enzymes included the following FAMILIES: Rieske non-heme iron oxygenases, type I extradiol dioxygenases of the vicinal oxygen chelate superfamily, the type II or LigB superfamily extradiol dioxygenases, and the type III extradiol dioxygenases belonging to the cupin superfamily as well as intradiol dioxygenases. SUBFAMILIES refer to the specific subfamily within FAMILIES assigned to the protein of interest.

<sup>4</sup>Accession number for the best in-house database/NCBI BLAST hit is specifically shown.

## (B) CN2 enzymes features

| List of unique proteins <sup>1</sup> | Phylogeny <sup>2</sup>                                                           | ORF <sup>1</sup> | Contig <sup>1</sup> | FAMILY <sup>3</sup>                    | SUBFAMILY <sup>3</sup>                                           | BEST HITS <sup>4</sup>                                                                       |
|--------------------------------------|----------------------------------------------------------------------------------|------------------|---------------------|----------------------------------------|------------------------------------------------------------------|----------------------------------------------------------------------------------------------|
| CN2-1 = CN1-1                        | <i>Betaproteobacteria</i><br>( <i>Achromobacter</i> )                            | CN2/8665         | CN2contig04944      | Rieske ferredoxin                      | Naphthalene dioxygenase/salicylate 5-hydroxylase                 | 94% NagAc <i>Ralstonia</i> sp. U2 (AAD12609)                                                 |
|                                      |                                                                                  | CN2/8666         | CN2contig04944      | Rieske alpha                           | Naphthalene dioxygenase ( <i>Proteobacteria</i> -like)           | 95% NagAc <i>Ralstonia</i> sp. U2 (AAD12610)                                                 |
|                                      |                                                                                  | CN2/15793        | CN2contig08915      | Rieske beta                            | Naphthalene dioxygenase                                          | 96% NagAc <i>Ralstonia</i> sp. U2 (AAD12610)                                                 |
|                                      |                                                                                  | CN2/15794        | CN2contig08915      | Rieske alpha                           | Naphthalene dioxygenase ( <i>Proteobacteria</i> -like)           | 97% NagAc <i>Ralstonia</i> sp. U2 (AAD12610)                                                 |
| CN2-2                                | <i>Gammaproteobacteria</i><br>( <i>Pseudomonas</i> )                             | CN2/11945        | CN2contig07084      | Rieske beta                            | Naphthalene dioxygenase ( <i>Proteobacteria</i> -like)           | 99% NahAd <i>Pseudomonas</i> sp. ND6 (NP_943189) and 78% <i>Ralstonia</i> sp. U2 (AAD12611)  |
|                                      |                                                                                  | CN2/11946        | CN2contig07084      | Rieske alpha                           | Naphthalene dioxygenase ( <i>Proteobacteria</i> -like)           | 99% NahAc <i>Pseudomonas</i> sp. ND6 (NP_943188) and 89% <i>Ralstonia</i> sp. U2 (AAD12610)  |
|                                      |                                                                                  | CN2/11947        | CN2contig07084      | Rieske ferredoxin                      | Naphthalene dioxygenase ( <i>Proteobacteria</i> -like)           | 100% NahAb <i>Pseudomonas</i> sp. ND6 (NP_943187) and 80% <i>Ralstonia</i> sp. U2 (AAD12609) |
|                                      |                                                                                  | CN2/11948        | CN2contig07084      | Rieske reductase                       | Naphthalene dioxygenase ( <i>Proteobacteria</i> -like)           | NahAa 99% <i>Pseudomonas</i> sp. ND6 (NP_943186) and 67% <i>Ralstonia</i> sp. U2 (AAD12606)  |
| CN2-3 = CN1-8                        | <i>Betaproteobacteria</i><br>( <i>Achromobacter</i> )                            | CN2/8417         | CN2contig04760      | EXDO                                   | Dihydroxynaphthalene dioxygenase                                 | 93% <i>Ralstonia</i> sp. U2 (AAD12614)                                                       |
| CN2-4                                | <i>Gammaproteobacteria</i><br>( <i>Pseudomonas</i> )                             | CN2/11942        | CN2contig07084      | EXDO                                   | Dihydroxynaphthalene dioxygenase                                 | 100% NahC <i>Pseudomonas</i> sp. ND6 (NP_943192) and 88% <i>Ralstonia</i> sp. U2 (AAD12614)  |
| CN2-5                                | <i>Gammaproteobacteria</i><br>( <i>Pseudomonas</i> )                             | CN2/11944        | CN2contig07084      | Dihydrodiol dehydrogenase              | Naphthalene dihydrodiol dehydrogenase                            | 99% NahB <i>Pseudomonas</i> sp. ND6 (NP_943190) and 85% <i>Ralstonia</i> sp. U2 (AAD12612)   |
| CN2-6                                | <i>Betaproteobacteria</i><br>( <i>Achromobacter</i> )                            | CN2/17233        | CN2contig09709      | Dihydrodiol dehydrogenase              | Naphthalene dihydrodiol dehydrogenase                            | 94% <i>Ralstonia</i> sp. U2 (AAD12612)                                                       |
| CN2-7                                | <i>Gammaproteobacteria</i><br>( <i>Pseudomonas</i> )                             | CN2/11939        | CN2contig07084      | Other protein families (isomerase)     | 2-Hydroxychromene-2-carboxylate isomerase                        | 100% NahD <i>Pseudomonas</i> sp. ND6 (NP_943093) and 70% <i>Ralstonia</i> sp. U2 (AAD12617)  |
| CN2-8                                | <i>Gammaproteobacteria</i><br>( <i>Pseudomonas</i> )                             | CN2/11940        | CN2contig07084      | Other protein families (aldolase)      | trans-o-Hydroxybenzylidene pyruvate hydratase-aldolase           | 100% NahE <i>Pseudomonas</i> sp. ND6 (NP_943093) and 89% <i>Ralstonia</i> sp. U2 (AAD12616)  |
| CN2-9                                | <i>Betaproteobacteria</i> -<br>ORF too short (120 AA)<br>for assigning phylogeny | CN2/6956         | CN2contig03788      | Salicylaldehyde dehydrogenase          | Salicylaldehyde dehydrogenase                                    | 82% <i>Leptothrix cholodnii</i> SP-6 (Lcho0804; NC_010524)                                   |
| CN2-10                               | <i>Gammaproteobacteria</i><br>( <i>Pseudomonas</i> )                             | CN2/11943        | CN2contig07084      | Other protein families (dehydrogenase) | Salicylaldehyde dehydrogenase                                    | 100% NahF <i>Pseudomonas</i> sp. ND6 (NP_943191) and 89% <i>Ralstonia</i> sp. U2 (AAD12613)  |
| CN2-11 = CN1-15                      | <i>Betaproteobacteria</i><br>( <i>Achromobacter</i> )                            | CN2/0419         | CN2contig00156      | Rieske ferredoxin                      | Salicylate 5-hydroxylase                                         | 94% <i>Achromobacter piechaudii</i> (ZP_06686007)                                            |
|                                      |                                                                                  | CN2/0420         | CN2contig00156      | Rieske beta                            | Salicylate 5-hydroxylase                                         | 96% <i>Achromobacter piechaudii</i> (ZP_06686008)                                            |
|                                      |                                                                                  | CN2/0421         | CN2contig00156      | Rieske alpha                           | Salicylate 5-hydroxylase                                         | 98% <i>Achromobacter piechaudii</i> (ZP_06686009)                                            |
| CN2-12                               | <i>Betaproteobacteria</i><br>( <i>Achromobacter</i> )                            | CN2/3310         | CN2contig01635      | Rieske alpha                           | Function unknown (distantly related to salicylate 5-hydroxylase) | 96% <i>Achromobacter piechaudii</i> (ZP_06688288)                                            |
| CN2-13 = CN1-                        | <i>Betaproteobacteria</i>                                                        | CN2/3755         | CN2contig01872      | Rieske beta                            | Salicylate 5-hydroxylase                                         | 71% <i>Polaramonas</i> sp. JS666 (Bpro0984)                                                  |

|                |                                           |           |                |                                    |                                                        |                                                          |
|----------------|-------------------------------------------|-----------|----------------|------------------------------------|--------------------------------------------------------|----------------------------------------------------------|
| 16             | <i>(Achromobacter)</i>                    | CN2/3756  | CN2contig01872 | Rieske alpha                       | Salicylate 5-hydroxylase                               | 87% <i>Polaromonas</i> sp. JS666 (Bpro0983)              |
|                |                                           | CN2/6954  | CN2contig03788 | Rieske beta                        | Salicylate 5-hydroxylase                               | 86% <i>Polaromonas</i> sp. JS666 (Bpro0984)              |
|                |                                           | CN2/6955  | CN2contig03788 | Rieske ferredoxin                  | Salicylate 5-hydroxylase                               | 71% <i>Polaromonas</i> sp. JS666 (Bpro0985)              |
|                |                                           | CN2/7750  | CN2contig04287 | Rieske alpha                       | Salicylate 5-hydroxylase                               | 88% <i>Polaromonas</i> sp. JS666 (Bpro0983)              |
| CN2-14         | <i>Gammaproteobacteria (Pseudomonas)</i>  | CN2/16709 | CN2contig09412 | Rieske ferredoxin                  | Salicylate 5-hydroxylase                               | 100% <i>Pseudomonas putida</i> AK5 (ACO92379)            |
|                |                                           | CN2/16710 | CN2contig09412 | Rieske beta                        | Salicylate 5-hydroxylase                               | 100% <i>Pseudomonas putida</i> AK5 (ACO92378)            |
|                |                                           | CN2/16711 | CN2contig09412 | Rieske alpha                       | Salicylate 5-hydroxylase                               | 100% <i>Pseudomonas putida</i> AK5 (ACO92377)            |
|                |                                           | CN2/16714 | CN2contig09412 | Rieske reductase                   | Salicylate 5-hydroxylase                               | 100% <i>Pseudomonas putida</i> AK5 (ACO92374)            |
| CN2-15         | <i>Betaproteobacteria (Achromobacter)</i> | CN2/2008  | CN2contig00900 | Rieske alpha                       | Function unknown (related to salicylate 5-hydroxylase) | 100% <i>Achromobacter piechaudii</i> (ZP_06687854)       |
|                |                                           | CN2/2009  | CN2contig00900 | Rieske ferredoxin                  | Function unknown (related to salicylate 5-hydroxylase) | 94% <i>Achromobacter piechaudii</i> (ZP_06687853)        |
| CN2-16         | <i>Betaproteobacteria (Achromobacter)</i> | CN2/0906  | CN2contig00386 | Cupin                              | Gentisate dioxygenase                                  | 99% <i>Achromobacter piechaudii</i> (ZP_06685546)        |
| CN2-17 = CN1-6 | <i>Betaproteobacteria (Achromobacter)</i> | CN2/3390  | CN2contig01687 | Cupin                              | Gentisate dioxygenase                                  | 100% <i>Ralstonia</i> sp. U2 (AAD12619)                  |
| CN2-18 = CN1-5 | <i>Betaproteobacteria (genus unclear)</i> | CN2/6053  | CN2contig03225 | Cupin                              | Gentisate dioxygenase                                  | 80% <i>Comamonas testosteroni</i> KF-2 (ZP_03542624)     |
|                |                                           | CN2/6059  | CN2contig03229 | Cupin                              | Gentisate dioxygenase                                  | 84% <i>Comamonas testosteroni</i> KF-2 (ZP_03542624)     |
| CN2-19 = CN1-4 | <i>Betaproteobacteria (Achromobacter)</i> | CN2/8906  | CN2contig05108 | Cupin                              | Gentisate dioxygenase                                  | 80% <i>Achromobacter piechaudii</i> (ZP_06684540)        |
|                |                                           | CN2/8907  | CN2contig05108 | Cupin                              | Gentisate dioxygenase                                  | 96% <i>Achromobacter piechaudii</i> (ZP_06684540)        |
| CN2-20         | <i>Gammaproteobacteria (Pseudomonas)</i>  | CN2/16713 | CN2contig09412 | Cupin                              | Gentisate dioxygenase                                  | 100% <i>Pseudomonas putida</i> AK5 (ACO92375)            |
| CN2-21         | <i>Betaproteobacteria (genus unclear)</i> | CN2/3389  | CN2contig01687 | Other protein families (hydrolase) | Fumarylpyruvate hydrolase                              | 82% <i>Leptothrix cholodnii</i> SP-6 Lcho3671 (ACB35925) |
| CN2-22         | <i>Gammaproteobacteria (Pseudomonas)</i>  | CN2/16708 | CN2contig09412 | Other protein families (hydrolase) | Fumarylpyruvate hydrolase                              | 100% <i>Pseudomonas putida</i> AK5 (ACO92383)            |
| CN2-23         | <i>Gammaproteobacteria (Pseudomonas)</i>  | CN2/16712 | CN2contig09412 | Other protein families (hydrolase) | Fumarylpyruvate hydrolase                              | 100% <i>Pseudomonas putida</i> AK5 (ACO92376)            |
| CN2-24         | <i>Gammaproteobacteria (Pseudomonas)</i>  | CN2/0050  | CN2contig00016 | Flavoprotein monooxygenase         | Salicylate 1-hydroxylase                               | 100% NahG <i>Pseudomonas</i> sp. ND6 (AAP4222)           |
|                |                                           | CN2/2365  | CN2contig01098 | Flavoprotein monooxygenase         | Salicylate 1-hydroxylase                               | 100% NahG <i>Pseudomonas</i> sp. ND6 (AAP4222)           |
|                |                                           | CN2/3285  | CN2contig01620 | Flavoprotein monooxygenase         | Salicylate 1-hydroxylase                               | 100% NahG <i>Pseudomonas</i> sp. ND6 (AAP4222)           |
|                |                                           | CN2/17374 | CN2contig09758 | Flavoprotein monooxygenase         | Salicylate 1-hydroxylase                               | 100% nahG <i>Pseudomonas</i> sp. ND6 (AAP4222)           |
|                |                                           | CN2/3796  | CN2contig01901 | Flavoprotein monooxygenase         | Salicylate 1-hydroxylase                               | 59% NahG <i>Pseudomonas</i> sp. ND6 (AAP4222)            |
| CN2-25         | <i>Gammaproteobacteria (Pseudomonas)</i>  | CN2/16920 | CN2contig09541 | Flavoprotein monooxygenase         | Salicylate 1-hydroxylase                               | 100% NahW <i>Pseudomonas stutzeri</i> (AAD02157)         |
| CN2-26         | <i>Gammaproteobacteria (Pseudomonas)</i>  | CN2/4832  | CN2contig02517 | EXDO                               | 2,3-Dihydroxybiphenyl dioxygenase                      | 84% PcbC <i>Pseudomonas</i> sp. DJ-12 (BAA07956)         |
| CN2-27         | <i>Betaproteobacteria (Achromobacter)</i> | CN2/7789  | CN2contig04321 | EXDO                               | 2,3-Dihydroxybiphenyl dioxygenase                      | 77% <i>Achromobacter xylosooxidans</i> A8 (pA81_033)     |
|                |                                           | CN2/13412 | CN2contig07862 | EXDO                               | 2,3-Dihydroxybiphenyl                                  | 64% <i>Achromobacter xylosooxidans</i> A8 (pA81_033)     |

|                 |                                                       |                        |                            |                                                      | dioxygenase                                                  |                                                                      |
|-----------------|-------------------------------------------------------|------------------------|----------------------------|------------------------------------------------------|--------------------------------------------------------------|----------------------------------------------------------------------|
| CN2-28 = CN1-25 | <i>Betaproteobacteria</i><br>( <i>Achromobacter</i> ) | CN2/2038               | CN2contig00922             | Rieske alpha                                         | Function unknown (distantly related to benzoate dioxygenase) | 98% <i>Achromobacter piechaudii</i> (ZP_06685665)                    |
| CN2-29 = CN1-24 | <i>Betaproteobacteria</i><br>( <i>Achromobacter</i> ) | CN2/15271              | CN2contig08673             | Rieske alpha                                         | Function unknown (distantly related to benzoate dioxygenase) | 97% <i>Achromobacter piechaudii</i> (ZP_06686030)                    |
|                 |                                                       | CN2/15272              | CN2contig08673             | Rieske beta                                          | Function unknown (distantly related to benzoate dioxygenase) | 98% <i>Achromobacter piechaudii</i> (ZP_06686029)                    |
| CN2-30          | <i>Betaproteobacteria</i><br>(genus unclear)          | CN2/6417               | CN2contig03445             | Rieske alpha                                         | Benzoate dioxygenase                                         | 85% <i>Bulkholderia multivorans</i> ATCC17616 Bmul3238 (ZP_03583404) |
| CN2-31          | <i>Gammaproteobacteria</i><br>( <i>Pseudomonas</i> )  | CN2/17820              | CN2contig09876             | Rieske ferredoxin                                    | Benzoate dioxygenase                                         | 96% BenC <i>Pseudomonas stutzeri</i> A1501 (PST1669)                 |
|                 |                                                       | CN2/17821              | CN2contig09876             | Rieske beta                                          | Benzoate dioxygenase                                         | 96% BenB <i>Pseudomonas stutzeri</i> A1501 (PST1668)                 |
|                 |                                                       | CN2/17822              | CN2contig09876             | Rieske alpha                                         | Benzoate dioxygenase                                         | 97% BenA <i>Pseudomonas stutzeri</i> A1501 (PST1667)                 |
| CN2-32          | <i>Gammaproteobacteria</i><br>( <i>Pseudomonas</i> )  | CN2/13057              | CN2contig07678             | Dihydrodiol dehydrogenase                            | Benzoate dihydrodiol dehydrogenase                           | 96% BenD <i>Pseudomonas stutzeri</i> A1501 (PST1670)                 |
|                 |                                                       | CN2/17819              | CN2contig09876             | Dihydrodiol dehydrogenase                            | Benzoate dihydrodiol dehydrogenase                           | 88% BenD <i>Pseudomonas stutzeri</i> A1501 (PST1670)                 |
| CN2-33          | <i>Gammaproteobacteria</i><br>( <i>Pseudomonas</i> )  | CN2/2673               | CN2contig01289             | Other protein families                               | Phenol hydroxylase subunit                                   | 86% LapP <i>Pseudomonas alkylphenolia</i> (AAP92394)                 |
|                 |                                                       | CN2/2674               | CN2contig01289             | Other protein families                               | Phenol hydroxylase subunit                                   | 75% LapO <i>Pseudomonas alkylphenolia</i> (AAP92393)                 |
|                 |                                                       | CN2/2675               | CN2contig01289             | Other protein families                               | Phenol hydroxylase subunit                                   | 86% LapN <i>Pseudomonas alkylphenolia</i> (AAP92392.1)               |
|                 |                                                       | CN2/2676               | CN2contig01289             | Other protein families                               | Phenol hydroxylase subunit                                   | 94% LapM <i>Pseudomonas alkylphenolia</i> (AAP92391)                 |
|                 |                                                       | CN2/2677               | CN2contig01289             | Other protein families                               | Phenol hydroxylase subunit                                   | 81% LapL <i>Pseudomonas alkylphenolia</i> (AAP92390)                 |
| CN2/2678        | CN2contig01289                                        | Other protein families | Phenol hydroxylase subunit | 69% LapK <i>Pseudomonas alkylphenolia</i> (AAP92389) |                                                              |                                                                      |
| CN2-34          | <i>Betaproteobacteria</i><br>( <i>Achromobacter</i> ) | CN2/9010               | CN2contig05176             | Flavoprotein monooxygenase                           | 3-Hydroxybenzoate 6-hydroxylase                              | 93% <i>Achromobacter piechaudii</i> (ZP_06684546)                    |
| CN2-35          | <i>Gammaproteobacteria</i><br>( <i>Pseudomonas</i> )  | CN2/5182               | CN2contig02698             | INTRA                                                | Catechol 1,2-dioxygenase                                     | 79% <i>Pseudomonas denitrificans</i> (Pden1176)                      |
| CN2-36          | <i>Betaproteobacteria</i><br>(genus unclear)          | CN2/6108               | CN2contig03261             | INTRA                                                | Catechol 1,2-dioxygenase                                     | 88% <i>Alicyclophilus denitrificans</i> (Alide_2650)                 |
| CN2-37          | <i>Gammaproteobacteria</i><br>( <i>Pseudomonas</i> )  | CN2/13061              | CN2contig07678             | INTRA                                                | Catechol 1,2-dioxygenase                                     | 93% CatA <i>Pseudomonas stutzeri</i> A1501 (PST1674)                 |
| CN2-38          | <i>Gammaproteobacteria</i><br>( <i>Pseudomonas</i> )  | CN2/17371              | CN2contig09758             | EXDO                                                 | Catechol 2,3-dioxygenase ( <i>Pseudomonads</i> -like)        | 100% NahH <i>Pseudomonas</i> sp. ND6 (AAP44220)                      |
|                 |                                                       | CN2/18217              | CN2contig10059             | EXDO                                                 | Catechol 2,3-dioxygenase ( <i>Pseudomonads</i> -like)        | 94% <i>Pseudomonas</i> sp. ND6 (AAP44220)                            |
| CN2-39          | <i>Gammaproteobacteria</i><br>( <i>Pseudomonas</i> )  | CN2/2679               | CN2contig01289             | EXDO                                                 | Catechol 2,3-dioxygenase                                     | 85% LapB <i>Pseudomonas</i> sp. KI28 (3HPV_A)                        |
| CN2-40          | <i>Betaproteobacteria</i><br>(genus unclear)          | CN2/5184               | CN2contig02698             | Other protein families (isomerase)                   | Muconate cycloisomerase                                      | 78% <i>Bulkholderia multivorans</i> ATCC17616 (Bmul3235)             |
| CN2-41          | <i>Betaproteobacteria</i><br>(genus unclear)          | CN2/6107               | CN2contig03261             | Other protein families (isomerase)                   | Muconate cycloisomerase                                      | 86% <i>Alicyclophilus denitrificans</i> (Alide_2651)                 |
| CN2-42          | <i>Gammaproteobacteria</i><br>( <i>Pseudomonas</i> )  | CN2/13059              | CN2contig07678             | Other protein families (isomerase)                   | Muconate cycloisomerase                                      | 95% CatB <i>Pseudomonas stutzeri</i> A1501 (PST1672)                 |
| CN2-43          | <i>Gammaproteobacteria</i>                            | CN2/13060              | CN2contig07678             | Other protein families                               | Muconolactone isomerase                                      | 96% CatC <i>Pseudomonas stutzeri</i> A1501 (PST1673)                 |

|                 |                                                       |           |                |                                                  |                                                                                   |                                                                               |
|-----------------|-------------------------------------------------------|-----------|----------------|--------------------------------------------------|-----------------------------------------------------------------------------------|-------------------------------------------------------------------------------|
|                 | ( <i>Pseudomonas</i> )                                |           |                | (isomerase)                                      |                                                                                   |                                                                               |
| CN2-44          | <i>Betaproteobacteria</i><br>(genus unclear)          | CN2/5183  | CN2contig02698 | Other protein families<br>(isomerase)            | Muconolactone isomerase                                                           | 85% <i>Bulkholderia multivorans</i> ATCC17616 (Bmul3236)                      |
| CN2-45          | <i>Gammaproteobacteria</i><br>( <i>Pseudomonas</i> )  | CN2/2671  | CN2contig01289 | Other protein families<br>(dehydrogenase)        | 2-Hydroxymuconic acid<br>semialdehyde dehydrogenase                               | 91% LapC <i>Pseudomonas</i> sp. KI28                                          |
| CN2-46          | <i>Betaproteobacteria</i><br>(genus unclear)          | CN2/5469  | CN2contig02873 | Other protein families<br>(dehydrogenase)        | 2-Hydroxymuconic acid<br>semialdehyde dehydrogenase                               | 89% <i>Comamonas testosteroni</i> KF-1 (ZP_03546055)                          |
| CN2-47          | <i>Gammaproteobacteria</i><br>( <i>Pseudomonas</i> )  | CN2/17370 | CN2contig09758 | Other protein families<br>(dehydrogenase)        | 2-Hydroxymuconic acid<br>semialdehyde dehydrogenase                               | 100% <i>Pseudomonas</i> sp. ND6 nahl (AAP44219)                               |
|                 |                                                       | CN2/18216 | CN2contig10059 | Other protein families<br>(dehydrogenase)        | 2-Hydroxymuconic acid<br>semialdehyde dehydrogenase                               | 96% <i>Pseudomonas</i> sp. ND6 nahl (AAP44219)                                |
| CN2-48          | <i>Gammaproteobacteria</i><br>( <i>Pseudomonas</i> )  | CN2/17369 | CN2contig09758 | Other protein families<br>(hydrolase)            | 2-Hydroxymuconic acid<br>semialdehyde hydrolase                                   | 100% <i>Pseudomonas</i> sp. ND6 nahN (AAP44218)                               |
| CN2-49          | <i>Gammaproteobacteria</i><br>( <i>Pseudomonas</i> )  | CN2/8952  | CN2contig05137 | Other protein families<br>(lyase)                | 2-Oxopent-4-enoate hydratase                                                      | 100% NahL <i>Pseudomonas putida</i> GJ31 (AAX38568)                           |
| CN2-50          | <i>Gammaproteobacteria</i><br>( <i>Pseudomonas</i> )  | CN2/2669  | CN2contig01289 | Other protein families<br>(tautomerase)          | Oxalocrotonate tautomerase                                                        | 74% LapI <i>Pseudomonas</i> sp. KI28                                          |
| CN2-51          | <i>Gammaproteobacteria</i><br>( <i>Pseudomonas</i> )  | CN2/17365 | CN2contig09758 | Other protein families<br>(tautomerase)          | 4-Oxalocrotonate tautomerase                                                      | 100% NahJ <i>Pseudomonas</i> sp. ND6 (AAP44213)                               |
| CN2-52          | <i>Gammaproteobacteria</i><br>( <i>Pseudomonas</i> )  | CN2/17367 | CN2contig09758 | Other protein families<br>(aldolase)             | 4-Hydroxy-2-oxovalerate<br>aldolase                                               | 100% NahM <i>Pseudomonas</i> sp. ND6 (AAP44215)                               |
| CN2-53          | <i>Gammaproteobacteria</i><br>( <i>Pseudomonas</i> )  | CN2/2667  | CN2contig01289 | Other protein families<br>(aldolase)             | 4-Hydroxy-2-oxovalerate<br>aldolase                                               | 91% LapG <i>Pseudomonas alkylphenolia</i> KL28                                |
| CN2-54          | <i>Gammaproteobacteria</i><br>( <i>Pseudomonas</i> )  | CN2/2670  | CN2contig01289 | Other protein families<br>(lyase)                | 2-Hydroxypent-2,4-dienoate<br>hydratase/4-oxalocrotonate<br>decarboxylase chimera | 92% LapE (1-263) and 88% LapH (266-end) <i>Pseudomonas alkylphenolia</i> KL28 |
| CN2-55          | <i>Gammaproteobacteria</i><br>( <i>Pseudomonas</i> )  | CN2/2668  | CN2contig01289 | Other protein families<br>(dehydrogenase)        | Acetaldehyde dehydrogenase                                                        | LapF 90% <i>Pseudomonas alkylphenolia</i> KL28                                |
| CN2-56          | <i>Gammaproteobacteria</i><br>( <i>Pseudomonas</i> )  | CN2/17368 | CN2contig09758 | Other protein families<br>(dehydrogenase)        | Acetaldehyde dehydrogenase                                                        | 100% NahO <i>Pseudomonas</i> sp. ND6 (AAP44216)                               |
| CN2-57 = CN1-40 | <i>Gammaproteobacteria</i><br>(genus unclear)         | CN2/1892  | CN2contig00828 | Other protein families<br>(non-heme dioxygenase) | 4-Hydroxyphenylpyruvate<br>dioxygenase                                            | 100% <i>Stenotrophomonas maltophilia</i> R551-3 (Smal_3739)                   |
|                 |                                                       | CN2/4701  | CN2contig02432 | Other protein families<br>(non-heme dioxygenase) | 4-Hydroxyphenylpyruvate<br>dioxygenase                                            | 96% <i>Stenotrophomonas maltophilia</i> R551-3 (Smal_3739)                    |
| CN2-58          | <i>Gammaproteobacteria</i><br>( <i>Pseudomonas</i> )  | CN2/3407  | CN2contig01694 | Other protein families<br>(non-heme dioxygenase) | 4-Hydroxyphenylpyruvate<br>dioxygenase                                            | 94% <i>Pseudomonas stutzeri</i> A1501 (PST0869)                               |
| CN2-59          | <i>Gammaproteobacteria</i><br>( <i>Pseudomonas</i> )  | CN2/5593  | CN2contig02955 | Other protein families<br>(non-heme dioxygenase) | 4-Hydroxyphenylpyruvate<br>dioxygenase                                            | 68% <i>Pseudomonas stutzeri</i> A1501 (PST_0200)                              |
| CN2-60          | <i>Gammaproteobacteria</i><br>(genus unclear)         | CN2/6542  | CN2contig03521 | Other protein families<br>(non-heme dioxygenase) | 4-Hydroxyphenylpyruvate<br>dioxygenase                                            | 84% <i>Pseudomonas fluorescens</i> SBW25 PFL (YP_002872577)                   |
| CN2-61          | <i>Betaproteobacteria</i><br>( <i>Achromobacter</i> ) | CN2/13419 | CN2contig07868 | Other protein families<br>(non-heme dioxygenase) | 4-Hydroxyphenylpyruvate<br>dioxygenase                                            | 100% <i>Achromobacter piechaudii</i> (ZP_06690133)                            |
| CN2-62          | <i>Gammaproteobacteria</i><br>(genus unclear)         | CN2/5775  | CN2contig03059 | Cupin                                            | Homogentisate dioxygenase                                                         | 77% <i>Pseudomonas putida</i> W619i (ACA71322)<br>(PputW619_0817)             |
| CN2-63          | <i>Betaproteobacteria</i><br>( <i>Achromobacter</i> ) | CN2/8307  | CN2contig04687 | Cupin                                            | Homogentisate dioxygenase                                                         | 99% <i>Achromobacter piechaudii</i> (ZP_06689958)                             |
|                 |                                                       | CN2/12224 | CN2contig07248 | Cupin                                            | Homogentisate dioxygenase                                                         | 89% <i>Achromobacter piechaudii</i> (ZP_06689958)                             |
| CN2-64          | <i>Gammaproteobacteria</i><br>(genus unclear)         | CN2/1891  | CN2contig00828 | Cupin                                            | Homogentisate dioxygenase                                                         | 97% <i>Stenotrophomonas maltophilia</i> R551-3 (Smal_3738)                    |
| CN2-65          | <i>Gammaproteobacteria</i>                            | CN2/5776  | CN2contig03059 | Other protein families                           | Fumarylacetoacetate hydrolase                                                     | 70% <i>Pseudomonas putida</i> W619 (PputW619_0818)                            |

|                 |                                                       |           |                |                                           |                                                                                     |                                                                         |
|-----------------|-------------------------------------------------------|-----------|----------------|-------------------------------------------|-------------------------------------------------------------------------------------|-------------------------------------------------------------------------|
|                 | (genus unclear)                                       |           |                | (hydrolase)                               |                                                                                     |                                                                         |
| CN2-66          | <i>Betaproteobacteria</i><br>( <i>Achromobacter</i> ) | CN2/12223 | CN2contig07248 | Other protein families<br>(hydrolase)     | Fumarylacetoacetate hydrolase                                                       | 76% <i>Achromobacter piechaudii</i> (ZP_06689959)                       |
| CN2-67          | <i>Betaproteobacteria</i><br>(genus unclear)          | CN2/9561  | CN2contig05551 | Other protein families<br>(lyase)         | Benzylformate decarboxylase                                                         | 59% <i>Burkholderia phymatum</i> STM815 (YP_001862255)                  |
| CN2-68          | <i>Gammaproteobacteria</i><br>(genus unclear)         | CN2/5171  | CN2contig02690 | Flavoprotein<br>monoxygenase              | 4-Hydroxybenzoate 3-<br>hydroxylase                                                 | 88% <i>Pseudomonas putida</i> W619 (W619_1946)                          |
| CN2-69          | <i>Betaproteobacteria</i><br>( <i>Achromobacter</i> ) | CN2/9560  | CN2contig05551 | Flavoprotein<br>monoxygenase              | 4-Hydroxybenzoate 3-<br>hydroxylase                                                 | 75% <i>Achromobacter piechaudii</i> (ZP_06689206)                       |
| CN2-70 = CN1-32 | <i>Betaproteobacteria</i><br>( <i>Achromobacter</i> ) | CN2/2431  | CN2contig01140 | Rieske alpha                              | Vanillate monoxygenase                                                              | 88% <i>Achromobacter xylosooxidans</i> A8 (AXYL_02987)                  |
| CN2-71          | <i>Betaproteobacteria</i><br>(genus unclear)          | CN2/6302  | CN2contig03379 | Rieske alpha                              | Vanillate monoxygenase                                                              | 75% <i>Cupriavidus necator</i> JMP134 ReutB5370 (YP_297772)             |
| CN2-72          | <i>Betaproteobacteria</i><br>( <i>Achromobacter</i> ) | CN2/6026  | CN2contig03209 | INTRA                                     | Protocatechuate 3,4-<br>dioxygenase beta subunit                                    | 87% <i>Achromobacter piechaudii</i> (ZP_06689204)                       |
| CN2-73          | <i>Betaproteobacteria</i><br>(genus unclear)          | CN2/5000  | CN2contig02616 | LigB                                      | Homoprotocatechuate<br>dioxygenase                                                  | 89% <i>Burkholderia bronchiseptica</i> RB50 (NP_887287)                 |
| CN2-74 = CN1-50 | <i>Betaproteobacteria</i><br>( <i>Achromobacter</i> ) | CN2/8005  | CN2contig04472 | LigB                                      | Homoprotocatechuate<br>dioxygenase                                                  | 93% <i>Achromobacter piechaudii</i> (ZP_06690164)                       |
| CN2-75          | <i>Betaproteobacteria</i><br>( <i>Achromobacter</i> ) | CN2/8006  | CN2contig04472 | Other protein families<br>(dehydrogenase) | Carboxymethylmuconic<br>semialdehyde dehydrogenase                                  | 99% <i>Achromobacter piechaudii</i> (ZP_06690163)                       |
| CN2-76          | <i>Betaproteobacteria</i><br>(genus unclear)          | CN2/5001  | CN2contig02616 | Other protein families<br>(dehydrogenase) | Carboxymethylmuconic<br>semialdehyde dehydrogenase                                  | 96% <i>Burkholderia bronchiseptica</i> RB50 (NP_887286)                 |
| CN2-77          | <i>Betaproteobacteria</i><br>( <i>Achromobacter</i> ) | CN2/2410  | CN2contig01133 | Rieske alpha                              | Ibuprofen-CoA dioxygenase<br>(related to putative<br><i>Sphingomonas</i> sp. Ibu-2) | 97% <i>Achromobacter piechaudii</i> (ZP_06686030)                       |
|                 |                                                       | CN2/2409  | CN2contig01133 | Rieske reductase                          | Ibuprofen-CoA dioxygenase<br>(related to putative<br><i>Sphingomonas</i> sp. Ibu-2) | 92% <i>Achromobacter piechaudii</i> (ZP_06686031)                       |
| CN2-78 = CN1-55 | <i>Betaproteobacteria</i><br>(genus unclear)          | CN2/2603  | CN2contig01250 | LigB                                      | 2-Aminophenol 1,6-dioxygenase                                                       | 88% <i>Burkholderia xenovorans</i> LB400 (Bxe_A1145)                    |
| CN2-79          | <i>Betaproteobacteria</i><br>( <i>Achromobacter</i> ) | CN2/5958  | CN2contig03167 | Flavoprotein<br>monoxygenase              | 6-Hydroxynicotinate 3-<br>monoxygenase                                              | 97% <i>Achromobacter piechaudii</i> (ZP_06684483)                       |
| CN2-80          | <i>Gammaproteobacteria</i><br>( <i>Pseudomonas</i> )  | CN2/17372 | CN2contig09758 | Rieske ferredoxin                         | XylIT ferredoxin                                                                    | 100% NahT <i>Pseudomonas</i> sp. ND6 AAP44221 (NP_863104)               |
| CN2-81          | <i>Gammaproteobacteria</i><br>( <i>Pseudomonas</i> )  | CN2/16715 | CN2contig09412 | Other protein families<br>(regulator)     | NahR transcriptional regulator                                                      | 100% <i>Pseudomonas putida</i> AK5 (ACO92380)                           |
| CN2-82          | <i>Gammaproteobacteria</i><br>( <i>Pseudomonas</i> )  | CN2/2680  | CN2contig01289 | Other protein families<br>(regulator)     | LapR regulator                                                                      | 80% LapR <i>Pseudomonas alkylphenolia</i> KL28 (AAP92387)               |
| CN2-83          | <i>Gammaproteobacteria</i><br>( <i>Pseudomonas</i> )  | CN2/5774  | CN2contig03059 | Other protein families<br>(regulator)     | LclR regulator                                                                      | 63% LclR <i>Pseudomonas syringae</i> pv.tabaci ATCC 11528 (ZP_05638791) |
| CN2-84          | <i>Gammaproteobacteria</i><br>( <i>Pseudomonas</i> )  | CN2/17823 | CN2contig09876 | Other protein families<br>(regulator)     | Regulator                                                                           | 93% BenR <i>Pseudomonas stutzeri</i> A1501 (PST1669)                    |
| CN2-85          | <i>Betaproteobacteria</i><br>( <i>Achromobacter</i> ) | CN2/2010  | CN2contig00900 | Flavoprotein<br>monoxygenase              | Function unknown                                                                    | 77% <i>Achromobacter piechaudii</i> (ZP_06687852)                       |
| CN2-86          | <i>Betaproteobacteria</i><br>( <i>Achromobacter</i> ) | CN2/2213  | CN2contig01025 | Rieske alpha                              | Function unknown                                                                    | 99% <i>Achromobacter piechaudii</i> (ZP_06686669)                       |
| CN2-87          | <i>Betaproteobacteria</i><br>( <i>Achromobacter</i> ) | CN2/2866  | CN2contig01398 | Rieske alpha                              | Function unknown                                                                    | 96% <i>Achromobacter piechaudii</i> (ZP_06688288)                       |
|                 |                                                       | CN2/2867  | CN2contig01398 | Rieske beta                               | Function unknown                                                                    | 83% <i>Achromobacter piechaudii</i> (ZP_06688289)                       |



|                 |                                                       |           |                |                                         |                                   |                                                                                           |
|-----------------|-------------------------------------------------------|-----------|----------------|-----------------------------------------|-----------------------------------|-------------------------------------------------------------------------------------------|
| CN2-88          | <i>Betaproteobacteria</i><br>(genus unclear)          | CN2/4017  | CN2contig02029 | Rieske beta                             | Function unknown                  | 71% <i>Burkholderia bronchiseptica</i> RB50 (NP_887280)                                   |
|                 |                                                       | CN2/1050  | CN2contig00452 | Rieske alpha                            | Function unknown                  | 92% <i>Burkholderia bronchiseptica</i> RB50 (NP_887278)                                   |
| CN2-89          | <i>Betaproteobacteria</i><br>( <i>Achromobacter</i> ) | CN2/10832 | CN2contig06384 | Rieske alpha                            | Function unknown                  | 78% <i>Achromobacter piechaudii</i> (ZP_06688288)                                         |
| CN2-90          | <i>Betaproteobacteria</i><br>(genus unclear)          | CN2/1110  | CN2contig00485 | EXDO                                    | Function unknown (LysR regulator) | 54% <i>Burkholderia</i> sp. H160 (ZP_03269777)                                            |
| CN2-91          | <i>Betaproteobacteria</i><br>(genus unclear)          | CN2/16975 | CN2contig09603 | Rieske alpha                            | Function unknown                  | 71% <i>Comamonas testosteroni</i> CNB-2 (YP_003279568)                                    |
| CN2-92          | <i>Betaproteobacteria</i><br>(genus unclear)          | CN2/1808  | CN2contig00789 | Rieske alpha                            | Function unknown                  | 63% <i>Burkholderia xenovorans</i> LB400 Bxe_B1578 (ABE34386)                             |
| CN2-93          | <i>Gammaproteobacteria</i><br>( <i>Pseudomonas</i> )  | CN2/2672  | CN2contig01289 | Other protein families                  | Glutathione dependent enzyme      | 42% <i>Novosphingobium aromaticivorans</i> DSM 12444 (YP_497099)                          |
| CN2-94          | <i>Gammaproteobacteria</i><br>( <i>Pseudomonas</i> )  | CN2/2681  | CN2contig01289 | Other protein families                  | Putative methyl-accepting protein | 67% <i>Pseudomonas alkylphenolia</i> KL28 (AAP92386)                                      |
| CN2-95          | <i>Gammaproteobacteria</i><br>( <i>Pseudomonas</i> )  | CN2/2682  | CN2contig01289 | Other protein families<br>(transporter) | Transporter                       | 67% <i>Pseudomonas fluorescens</i> WH6 (ZP_07774655)                                      |
| CN2-96          | <i>Gammaproteobacteria</i><br>( <i>Pseudomonas</i> )  | CN2/11941 | CN2contig07084 | Other protein families                  | Membrane protein                  | 98% NahQ <i>Pseudomonas</i> sp. ND6 (AAP44191) and 76% <i>Ralstonia</i> sp. U2 (AAD12615) |
| CN2-97          | <i>Gammaproteobacteria</i><br>( <i>Pseudomonas</i> )  | CN2/13058 | CN2contig07678 | Other protein families<br>(transporter) | Transport protein                 | 90% BenK <i>Pseudomonas stutzeri</i> A1501 (PST1671)                                      |
| CN2-98          | <i>Gammaproteobacteria</i><br>( <i>Pseudomonas</i> )  | CN2/13062 | CN2contig07678 | Other protein families<br>(transporter) | Transport protein                 | 90% BenE <i>Pseudomonas stutzeri</i> A1501 (PST1675)                                      |
| CN2-99          | <i>Gammaproteobacteria</i><br>( <i>Pseudomonas</i> )  | CN2/13063 | CN2contig07678 | Other protein families<br>(transporter) | Porin                             | 75% BenD <i>Pseudomonas stutzeri</i> A1501 (PST1676)                                      |
| CN2-100         | <i>Gammaproteobacteria</i><br>( <i>Pseudomonas</i> )  | CN2/11949 | CN2contig07084 | Other protein families<br>(ligase)      | Ligase                            | 100% <i>Pseudomonas</i> sp. ND6 NP_943185.1 (not present in <i>Ralstonia</i> sp. U2)      |
| CN2-101         | <i>Gammaproteobacteria</i><br>(genus unclear)         | CN2/17363 | CN2contig09758 | Other protein families<br>(transposase) | Transposase                       | 80% <i>Pseudomonas</i> sp. K23 (BAC56721.1)                                               |
| CN2-102         | <i>Gammaproteobacteria</i><br>( <i>Pseudomonas</i> )  | CN2/17364 | CN2contig09758 | Other protein families                  | Chemotaxis                        | 100% NahY <i>Pseudomonas</i> sp. ND6 (AAP44212)                                           |
| CN2-13 = CN1-16 | <i>Betaproteobacteria</i><br>(genus unclear)          | CN2/3754  | CN2contig01872 | Rieske ferredoxin                       | Salicylate 5-hydroxylase          | 72% <i>Ralstonia eutropha</i> JMP134 ReutB4721 (YP_298913)                                |

<sup>1</sup>We might have overestimated the number of proteins in our metaproteomes by double counting of the fragmented open reading frames in the meta-sequences that were derived from the same gene/protein. In addition, some of the proteins (i.e. dioxygenases) herein investigated are formed by different subunits, that all together form a single protein. To take both issues into consideration the amino acid sequences of proteins with biochemical functions shown to be potentially involved in biodegradation, as suggested by in-house database-BLAST search, were manually BLAST and aligned to the best protein hit in the database to ensure identification of fragments most likely belonging to the same sequence/protein (see first column; “list of unique proteins”). As example, the protein named CN2-1 (see first column; “list of unique proteins”) represents a single naphthalene dioxygenase that contain most likely alpha, beta and ferredoxin subunits of fragments CN2/8665, CN28666, CN2/15793 and CN2/15794 located in different short contigs. The protein ID (ORF) and contig where the gene was found within the pyro-sequences are specifically shown. BLAST alignment was performed between proteins contributing to the major aromatics aerobic degradation pathways found in the different metagenomes. Thus, proteins sharing the same “best hit” and amino acid sequence homology, were specifically indicated; as example, the protein named CN2-1 (see first column; “list of unique proteins”) represent a single naphthalene dioxygenase most similar to CN1-1 naphthalene dioxygenase.

<sup>2</sup>For taxonomic assignment complete genome sequences were obtained from NCBI and used to map the contigs containing the gene coding the protein(s) with biochemical functions shown to be potentially involved in biodegradation.

<sup>3</sup>Functional assignment of the predicted genes involved in degradation was made on the basis of BLASTP analysis against an in-house database that contained gene sequences encoding enzymes that usually perform key catalysing steps in the aerobic degradation of pollutants via di- and trihydroxylated intermediates (**Table S8**). These enzymes included the following FAMILIES: Rieske

non-heme iron oxygenases, type I extradiol dioxygenases of the vicinal oxygen chelate superfamily, the type II or LigB superfamily extradiol dioxygenases, and the type III extradiol dioxygenases belonging to the cupin superfamily as well as intradiol dioxygenases. SUBFAMILIES refer to the specific subfamily within FAMILIES assigned to the protein of interest.

<sup>4</sup>Accession number for the best in-house database/NCBI BLAST hit is specifically shown.

## (C) N enzymes features

| List of unique proteins <sup>1</sup> | Phylogeny <sup>2</sup>                                                          | ORF <sup>1</sup> | Contig <sup>1</sup> | FAMILY <sup>3</sup>                       | SUBFAMILY <sup>3</sup>                                       | BEST HITS <sup>4</sup>                                                        |
|--------------------------------------|---------------------------------------------------------------------------------|------------------|---------------------|-------------------------------------------|--------------------------------------------------------------|-------------------------------------------------------------------------------|
| N-1                                  | <i>Gammaproteobacteria</i><br>( <i>Pseudomonas</i> )                            | N/2334           | Ncontig01812        | EXDO                                      | Dihydroxynaphthalene dioxygenase                             | 99% NahC AN10 <i>Pseudomonas stutzeri</i> (AAD02140)                          |
|                                      |                                                                                 | N/3459           | Ncontig02736        | EXDO                                      | Dihydroxynaphthalene dioxygenase                             | 95% NahC AN10 <i>Pseudomonas stutzeri</i> (AAD02140)                          |
| N-2                                  | <i>Gammaproteobacteria</i><br>( <i>Pseudomonas</i> )                            | N/3458           | Ncontig02736        | Other protein families<br>(dehydrogenase) | Salicylaldehyde dehydrogenase                                | 97% NahF AN10 <i>Pseudomonas stutzeri</i> (AAD02139)                          |
| N-3                                  | <i>Gammaproteobacteria</i><br>( <i>Pseudomonas</i> )                            | N/1828           | Ncontig01406        | Flavoprotein monooxygenase                | Salicylate 1-hydroxylase                                     | 100% NahG AN10 <i>Pseudomonas stutzeri</i> (AAD02416)                         |
| N-4                                  | <i>Gammaproteobacteria</i><br>( <i>Pseudomonas</i> )                            | N/4256           | Ncontig03508        | Flavoprotein monooxygenase                | Salicylate 1-hydroxylase                                     | 99% NahW AN10 <i>Pseudomonas stutzeri</i> (AAD02157)                          |
| N-5                                  | <i>Gammaproteobacteria</i><br>( <i>Azotobacter</i> )                            | N/0017           | Ncontig00015        | EXDO                                      | Catechol 2,3-dioxygenase ( <i>Pseudomonads</i> -like)        | 91% XylE <i>Azotobacter vinelandii</i> DJ (also close to <i>Pseudomonas</i> ) |
| N-6                                  | <i>Gammaproteobacteria</i><br>( <i>Azotobacter</i> )                            | N/0616           | Ncontig00459        | EXDO                                      | Catechol 2,3-dioxygenase ( <i>Pseudomonads</i> -like)        | 99% NahH AN10 <i>Pseudomonas stutzeri</i> (AAD02148)                          |
| N-7                                  | <i>Gammaproteobacteria</i><br>( <i>Pseudomonas</i> )                            | N/2199           | Ncontig01706        | INTRA                                     | Catechol 1,2-dioxygenase                                     | 98% <i>Pseudomonas putida</i> KT24440 (NP_745846)                             |
| N-8                                  | <i>Betaproteobacteria</i> -<br>ORF too short (29 AA)<br>for assigning phylogeny | N/4527           | Ncontig03752        | EXDO                                      | Catechol 1,2-dioxygenase                                     | 100% <i>Pseudoxanthomonas spadix</i> BD-a59 (YP_004930521.1)                  |
| N-9                                  | <i>Gammaproteobacteria</i><br>( <i>Pseudomonas</i> )                            | N/0290           | Ncontig00216        | Other protein families                    | Phenol hydroxylase subunit dmpN                              | 93% DmpN <i>Pseudomonas putida</i> H (CAA56743)                               |
|                                      |                                                                                 | N/0291           | Ncontig00216        | Other protein families                    | Phenol hydroxylase subunit dmpM                              | 97% DmpM <i>Pseudomonas putida</i> H (CAA56723)                               |
| N-10                                 | <i>Gammaproteobacteria</i><br>( <i>Pseudomonas</i> )                            | N/2511           | Ncontig01963        | Rieske alpha                              | Biphenyl dioxygenase                                         | 97% BphAa <i>Pseudomonas</i> sp. Cam-1 (AAK14781)                             |
| N-11                                 | <i>Gammaproteobacteria</i><br>( <i>Pseudomonas</i> )                            | N/3972           | Ncontig03244        | Other protein families<br>(dehydrogenase) | Biphenyl dihydrodiol dehydrogenase                           | 97% BphB <i>Pseudomonas</i> sp. Cam-1 (AAK14786)                              |
| N-12                                 | <i>Gammaproteobacteria</i><br>( <i>Pseudomonas</i> )                            | N/3973           | Ncontig03244        | EXDO                                      | Dihydroxybiphenyl dioxygenase                                | 88% BphC <i>Pseudomonas</i> sp. Cam-1 (AAK14786)                              |
| N-13                                 | <i>Betaproteobacteria</i><br>( <i>Achromobacter</i> )                           | N/0414           | Ncontig00302        | Rieske alpha                              | Function unknown (distantly related to benzoate dioxygenase) | 100% <i>Pseudomonas resinovorans</i> (NP_758556)                              |
| N-14                                 | <i>Gammaproteobacteria</i><br>( <i>Pseudoxanthomonas</i> )                      | N/1923           | Ncontig01484        | Rieske beta                               | Benzoate dioxygenase                                         | 98% <i>Pseudoxanthomonas spadix</i> BD-a59 (YP_004931648.1)                   |
|                                      |                                                                                 | N/1924           | Ncontig01484        | Rieske alpha                              | Benzoate dioxygenase                                         |                                                                               |
| N-15                                 | <i>Alphaproteobacteria</i><br>( <i>Novosphingobium</i> )                        | N/4369           | Ncontig03607        | Rieske beta                               | Benzoate dioxygenase                                         | 86% <i>Ralstonia pickettii</i> 12D (Rpic12D1429)                              |
|                                      |                                                                                 | N/4370           | Ncontig03607        | Rieske alpha                              | Benzoate dioxygenase                                         | 78% <i>Ralstonia pickettii</i> 12D (Rpic12D1428)                              |
| N-16                                 | <i>Gammaproteobacteria</i>                                                      | N/4825           | NNcontig04021       | Flavoprotein                              | 4-Hydroxybenzoate 3-                                         | 92% <i>Pseudomonas brassicacearum</i> subsp.                                  |

|      |                                                            |        |              |                                                  |                                               |                                                                                          |
|------|------------------------------------------------------------|--------|--------------|--------------------------------------------------|-----------------------------------------------|------------------------------------------------------------------------------------------|
|      | ( <i>Pseudomonas</i> )                                     |        |              | monoxygenase                                     | hydroxylase                                   | <i>brassicacearum</i> NFM421 (PSEBR_a1192)                                               |
| N-17 | <i>Gammaproteobacteria</i><br>( <i>Azotobacter</i> )       | N/0022 | Ncontig00020 | INTRA                                            | Protocatechuate 3,4-dioxygenase alpha subunit | 99% <i>Pseudomonas putida</i> NCIMB9869 (AAA25921)                                       |
| N-18 | <i>Gammaproteobacteria</i><br>( <i>Pseudomonas</i> )       | N/4174 | Ncontig03429 | INTRA                                            | Protocatechuate 3,4-dioxygenase beta subunit  | 92% <i>Pseudomonas brassicacearum</i> subsp. <i>brassicacearum</i> NFM421 (PSEBR_a1268)  |
|      |                                                            | N/5143 | Ncontig04332 | INTRA                                            | Protocatechuate 3,4-dioxygenase alpha subunit | 92% <i>Pseudomonas brassicacearum</i> subsp. <i>brassicacearum</i> NFM421 (PSEBR_a1269)  |
| N-19 | <i>Gammaproteobacteria</i><br>( <i>Pseudomonas</i> )       | N/1561 | Ncontig01176 | Rieske alpha                                     | Vanillate monoxygenase                        | 99% <i>Pseudomonas brassicacearum</i> subsp. <i>brassicacearum</i> NFM421 (YP_004353409) |
| N-20 | <i>Gammaproteobacteria</i><br>( <i>Pseudomonas</i> )       | N/4194 | Ncontig03449 | Rieske alpha                                     | Vanillate monoxygenase                        | 94% <i>Pseudomonas brassicacearum</i> subsp. <i>brassicacearum</i> NFM421 (PSEBR_a2987)  |
| N-21 | <i>Gammaproteobacteria</i><br>( <i>Pseudomonas</i> )       | N/0696 | Ncontig00520 | Other protein families<br>(non-heme dioxygenase) | 4-Hydroxyphenylpyruvate dioxygenase           | 94% <i>Pseudomonas brassicacearum</i> subsp. <i>brassicacearum</i> NFM421 (PSEBR_a4910)  |
| N-22 | <i>Gammaproteobacteria</i><br>( <i>Pseudoxanthomonas</i> ) | N/4944 | Ncontig04138 | Other protein families<br>(non-heme dioxygenase) | 4-Hydroxyphenylpyruvate dioxygenase           | 76% <i>Stenotrophomonas maltophilia</i> R551-3 (Smal_3739)                               |
| N-23 | <i>Gammaproteobacteria</i><br>( <i>Pseudomonas</i> )       | N/3453 | Ncontig02731 | LigB                                             | 2,3-Dihydroxyphenylpropionate dioxygenase     | 95% CbzE2 <i>Pseudomonas putida</i> GJ31 (AAX50134)                                      |
| N-24 | <i>Gammaproteobacteria</i><br>( <i>Pseudomonas</i> )       | N/4168 | Ncontig03424 | Cupin                                            | Homogentisate dioxygenase                     | 84% <i>Pseudomonas brassicacearum</i> subsp. <i>brassicacearum</i> (PSEBR_a4696)         |
| N-25 | <i>Betaproteobacteria</i><br>( <i>Acidovorax</i> )         | N/4526 | Ncontig03752 | Rieske ferredoxin                                | XylT ferredoxin                               | 64% <i>C. metallidurans</i> CH34 (Rmet_1325)                                             |
| N-26 | <i>Gammaproteobacteria</i><br>( <i>Azotobacter</i> )       | N/0617 | Ncontig00459 | Rieske ferredoxin                                | XylT ferredoxin                               | 100% NahT <i>Pseudomonas stutzeri</i> AN10 (AAD02147)                                    |
| N-27 | <i>Gammaproteobacteria</i><br>( <i>Pseudomonas</i> )       | N/0413 | Ncontig00302 | Rieske beta                                      | Function unknown                              | 100% <i>Pseudomonas resinovorans</i> (NP_758555)                                         |
|      |                                                            | N/3099 | Ncontig02436 | Rieske beta                                      | Function unknown                              | 100% <i>Pseudomonas resinovorans</i> (NP_758555)                                         |
| N-28 | <i>Gammaproteobacteria</i><br>( <i>Pseudomonas</i> )       | N/0898 | Ncontig00670 | Rieske alpha                                     | Function unknown                              | 94% <i>Pseudomonas brassicacearum</i> subsp. <i>brassicacearum</i> NFM421 (PSEBR_a5219)  |
| N-29 | <i>Alphaproteobacteria</i><br>( <i>Novosphingobium</i> )   | N/4279 | Ncontig03535 | LigB                                             | Function unknown                              | 41% <i>Mycobacterium</i> KMS (Mkms5613)                                                  |
| N-30 | <i>Gammaproteobacteria</i><br>( <i>Pseudomonas</i> )       | N/4292 | Ncontig03545 | EXDO                                             | Function unknown                              | 94% <i>Pseudomonas brassicacearum</i> subsp. <i>brassicacearum</i> NFM421 (PSEBR_a2130)  |
|      |                                                            | N/4293 | Ncontig03546 | EXDO                                             | Function unknown                              | 94% <i>Pseudomonas brassicacearum</i> subsp. <i>brassicacearum</i> NFM421 (PSEBR_a2130)  |
| N-31 | <i>Gammaproteobacteria</i><br>( <i>Pseudomonas</i> )       | N/4379 | Ncontig03618 | Rieske alpha                                     | Function unknown                              | 96% <i>Pseudomonas putida</i> W619 (PputW619_4892)                                       |
| N-32 | <i>Gammaproteobacteria</i><br>( <i>Pseudomonas</i> )       | N/5144 | Ncontig04332 | Other protein families<br>(transporter)          | Transport protein                             | 98% <i>Pseudomonas brassicacearum</i> subsp. <i>brassicacearum</i> NFM421 (PSEBR_a1270)  |
| N-33 | <i>Gammaproteobacteria</i><br>( <i>Pseudomonas</i> )       | N/2198 | Ncontig01706 | Other protein families<br>(isomerase)            | Muconolactone isomerase                       | 100% <i>Pseudomonas putida</i> KT24440 (NP_745847)                                       |
| N-34 | <i>Gammaproteobacteria</i><br>( <i>Pseudomonas</i> )       | N/1913 | Ncontig01476 | Rieske alpha                                     | Carbazol dioxygenase                          | 100% <i>Pseudomonas resinovorans</i> (NP_758567)                                         |
|      |                                                            | N/2182 | Ncontig01692 | Rieske alpha                                     | Carbazol dioxygenase                          | 98% <i>Pseudomonas resinovorans</i> (NP_758567)                                          |
|      |                                                            | N/4095 | Ncontig03363 | Rieske alpha                                     | Carbazol dioxygenase                          | 100% <i>Pseudomonas resinovorans</i> (NP_758567)                                         |
| N-35 | <i>Gammaproteobacteria</i><br>( <i>Pseudomonas</i> )       | N/2319 | Ncontig01797 | LigB                                             | 2'-Aminobiphenyl-2,3-diol-1,2-dioxygenase     | 100% <i>Pseudomonas resinovorans</i> (NP_758568)                                         |

|      |                                                    |        |              |              |                                           |                                                  |
|------|----------------------------------------------------|--------|--------------|--------------|-------------------------------------------|--------------------------------------------------|
|      |                                                    | N/2320 | Ncontig01797 | LigB         | 2'-Aminobiphenyl-2,3-diol-1,2-dioxygenase | 100% <i>Pseudomonas resinovorans</i> (NP_758569) |
| N-36 | <i>Gamma</i> proteobacteria ( <i>Pseudomonas</i> ) | N/1256 | Ncontig00938 | Rieske alpha | Anthranilate dioxygenase                  | 100% <i>Pseudomonas resinovorans</i> (NP_758548) |

<sup>1</sup>We might have overestimated the number of proteins in our metaproteomes by double counting of the fragmented open reading frames in the meta-sequences that were derived from the same gene/protein. In addition, some of the proteins (i.e. dioxygenases) herein investigated are formed by different subunits, that all together form a single protein. To take both issues into consideration the amino acid sequences of proteins with biochemical functions shown to be potentially involved in biodegradation, as suggested by in-house database-BLAST search, were manually BLAST and aligned to the best protein hit in the database to ensure identification of fragments most likely belonging to the same sequence/protein (see first column; "list of unique proteins"). As example, the protein named N-1 (see first column; "list of unique proteins") represents a single dihydroxynaphthalene dioxygenase that contain two fragments (N/2334 and N/3459) located in different short contigs. The protein ID (ORF) and contig where the gene was found within the pyro-sequences are specifically shown.

<sup>2</sup>For taxonomic assignment complete genome sequences were obtained from NCBI and used to map the contigs containing the gene coding the protein(s) with biochemical functions shown to be potentially involved in biodegradation.

<sup>3</sup>Functional assignment of the predicted genes involved in degradation was made on the basis of BLASTP analysis against an in-house database that contained gene sequences encoding enzymes that usually perform key catalysing steps in the aerobic degradation of pollutants via di- and trihydroxylated intermediates (**Table S8**). These enzymes included the following FAMILIES: Rieske non-heme iron oxygenases, type I extradiol dioxygenases of the vicinal oxygen chelate superfamily, the type II or LigB superfamily extradiol dioxygenases, and the type III extradiol dioxygenases belonging to the cupin superfamily as well as intradiol dioxygenases. SUBFAMILIES refer to the specific subfamily within FAMILIES assigned to the protein of interest.

<sup>4</sup>Accession number for the best in-house database/NCBI BLAST hit is specifically shown.

## (D) Nbs enzymes features

| List of unique proteins <sup>1</sup> | Phylogeny <sup>2</sup>                                              | ORF <sup>1</sup> | Contig <sup>1</sup> | FAMILY <sup>3</sup>    | SUBFAMILY <sup>3</sup>                                 | BEST HITS <sup>4</sup>                                                  |
|--------------------------------------|---------------------------------------------------------------------|------------------|---------------------|------------------------|--------------------------------------------------------|-------------------------------------------------------------------------|
| Nbs-1                                | <i>Gammaproteobacteria</i><br>( <i>Pseudomonas</i> )                | Nbs/0353         | contig00020         | Rieske ferredoxin      | Naphthalene dioxygenase                                | 99% <i>Pseudomonas stutzeri</i> AN10 (AF039533)                         |
| Nbs-2                                | <i>Betaproteobacteria</i> (genus unclear)                           | Nbs/4023         | contig00679         | Rieske ferredoxin      | Naphthalene dioxygenase                                | 100% DntAb <i>Burkholderia cepacia</i> (AAL50022.1)                     |
| Nbs-3                                | <i>Gammaproteobacteria</i><br>( <i>Pseudoxanthomonas</i> )          | Nbs/5873         | contig01300         | Rieske ferredoxin      | Naphthalene dioxygenase                                | 99% <i>Pseudoxanthomonas spadix</i> BD-a59 (YP_004930516.1)             |
| Nbs-4                                | <i>Betaproteobacteria</i> ( <i>Comamonas</i> )                      | Nbs/12423        | contig04930         | Rieske ferredoxin      | Naphthalene dioxygenase                                | 100% <i>Comamonas testosteroni</i> (AAF72975.1)                         |
| Nbs-5                                | <i>Gammaproteobacteria</i><br>( <i>Pseudomonas</i> )                | Nbs/14573        | contig06585         | Rieske alpha           | Naphthalene dioxygenase                                | 93% <i>Pseudomonas aeruginosa</i> 2192 (ZP_04934639)                    |
| Nbs-6                                | <i>Gammaproteobacteria</i><br>( <i>Pseudomonas</i> )                | Nbs/15601        | contig07460         | Rieske alpha           | Naphthalene dioxygenase                                | 96% <i>Pseudomonas aeruginosa</i> 2192 (ZP_04934623)                    |
| Nbs-8                                | <i>Gammaproteobacteria</i><br>( <i>Pseudomonas</i> )                | Nbs/0352         | contig00020         | Rieske alpha           | Naphthalene dioxygenase ( <i>Proteobacteria</i> -like) | 96% <i>Pseudomonas stutzeri</i> AN10 (ADK11287)                         |
| Nbs-9                                | <i>Betaproteobacteria</i> ( <i>Achromobacter</i> )                  | Nbs/4022         | contig00679         | Rieske alpha           | Naphthalene dioxygenase ( <i>Proteobacteria</i> -like) | 96% <i>Ralstonia</i> sp. U2 (AAD12610.1)                                |
| Nbs-10                               | <i>Betaproteobacteria</i> (unclear genus)                           | Nbs/14853        | contig06818         | Rieske alpha           | Naphthalene dioxygenase ( <i>Proteobacteria</i> -like) | 86% <i>Advenella kashmirensis</i> WT001(ZP_09478240.1)                  |
| Nbs-11                               | <i>Proteobacteria</i> - homology $\leq$ 50% for assigning phylogeny | Nbs/14967        | contig06915         | Rieske alpha           | Naphthalene dioxygenase ( <i>Proteobacteria</i> -like) | 50% <i>Novosphingobium</i> sp. PP1Y (YP_004534053.1)                    |
| Nbs-12                               | <i>Gammaproteobacteria</i><br>( <i>Pseudoxanthomonas</i> )          | Nbs/15072        | contig06999         | Rieske alpha           | Naphthalene dioxygenase ( <i>Proteobacteria</i> -like) | 100% <i>Pseudoxanthomonas spadix</i> BD-a59 (YP_004929419.1)            |
| Nbs-13                               | <i>Proteobacteria</i> - homology $\leq$ 50% for assigning phylogeny | Nbs/8937         | contig02765         | Rieske alpha           | Naphthalene dioxygenase ( <i>Proteobacteria</i> -like) | 49% <i>Novosphingobium aromaticivorans</i> DSM 12444 (YP_001165925)     |
| Nbs-14                               | <i>Gammaproteobacteria</i><br>( <i>Pseudoxanthomonas</i> )          | Nbs/8944         | contig02769         | Rieske alpha           | Naphthalene dioxygenase ( <i>Proteobacteria</i> -like) | 60% <i>Pseudoxanthomonas aromaticivorans</i> DSM 12444 (YP_001165876.1) |
| Nbs-15                               | <i>Betaproteobacteria</i> ( <i>Achromobacter</i> )                  | Nbs/4021         | contig00679         | Rieske beta            | Naphthalene dioxygenase ( <i>Proteobacteria</i> -like) | 99% <i>Polaromonas naphthalenivorans</i> CJ2 (YP_982710.1)              |
| Nbs-16                               | <i>Gammaproteobacteria</i><br>( <i>Pseudomonas</i> )                | Nbs/0348         | contig00020         | EXDO                   | Dihydroxynaphthalene dioxygenase                       | 98% <i>Pseudomonas stutzeri</i> AN10 (AAD02140)                         |
| Nbs-17                               | <i>Betaproteobacteria</i> ( <i>Achromobacter</i> )                  | Nbs/6698         | contig01626         | EXDO                   | Dihydroxynaphthalene dioxygenase                       | 99% <i>Polaromonas naphthalenivorans</i> CJ2 (YP_982706)                |
| Nbs-18                               | <i>Gammaproteobacteria</i><br>( <i>Pseudomonas</i> )                | Nbs/0350         | contig00020         | Other protein families | cis-Naphthalene dihydrodiol dehydrogenase              | 99% <i>Pseudomonas stutzeri</i> (AAD02138.1)                            |
| Nbs-19                               | <i>Betaproteobacteria</i> ( <i>Achromobacter</i> )                  | Nbs/16722        | contig08489         | Cupin                  | Gentisate dioxygenases ( <i>Proteobacteria</i> -like)  | 99% <i>Ralstonia</i> sp U2 (AAD12619)                                   |
| Nbs-20                               | <i>Betaproteobacteria</i> (genus unclear)                           | Nbs/20228        | contig12968         | Cupin                  | Gentisate dioxygenases ( <i>Proteobacteria</i> -like)  | 78% <i>Delftia acidovorans</i> SPH-1 (YP_001564719.1)                   |

|        |                                                                                                                                                              |           |             |                        |                                              |                                                              |
|--------|--------------------------------------------------------------------------------------------------------------------------------------------------------------|-----------|-------------|------------------------|----------------------------------------------|--------------------------------------------------------------|
| Nbs-21 | <i>Betaproteobacteria (Achromobacter)</i>                                                                                                                    | Nbs/4675  | contig00879 | Rieske alpha           | Salicylate 5-hydroxylase                     | 99% <i>Ralstonia</i> sp. U2 (YP_987295.1)                    |
| Nbs-22 | <i>Gammaproteobacteria (Pseudomonas)</i>                                                                                                                     | Nbs/2420  | contig00296 | Rieske ferredoxin      | Salicylate 5-hydroxylase                     | 87% <i>Pseudomonas stutzeri</i> ATCC 14405 (EHY75968.1)      |
|        | <i>Betaproteobacteria</i> (genus unclear)                                                                                                                    | Nbs/18640 | contig10655 | Rieske alpha           | Salicylate 5-hydroxylase                     | 100% <i>Polaromonas naphthalenivorans</i> CJ2 (YP_982713.1)  |
| Nbs-23 | <i>Gammaproteobacteria (Pseudomonas)</i>                                                                                                                     | Nbs/10351 | contig03578 | EXDO                   | 2,3-Dihydroxybiphenyl dioxygenase            | 87% <i>Pseudomonas putida</i> GB-1 (YP_001670926.1)          |
| Nbs-24 | <i>Gammaproteobacteria (Pseudomonas)</i>                                                                                                                     | Nbs/10637 | contig03757 | EXDO                   | 2,3-Dihydroxybiphenyl dioxygenase            | 100% BphC <i>Pseudomonas putida</i> OU83 (CAA62978)          |
| Nbs-25 | <i>Betaproteobacteria</i> (genus unclear)                                                                                                                    | Nbs/4998  | contig00982 | Rieske alpha           | Benzoate dioxygenase                         | 83% <i>Lutiella nitroferum</i> (ZP_03698426)                 |
| Nbs-26 | <i>Betaproteobacteria (Achromobacter)</i>                                                                                                                    | Nbs/4996  | contig00982 | Rieske alpha           | Benzoate dioxygenase                         | 82% <i>Ralstonia eutropha</i> JMP134 (YP_298599)             |
| Nbs-27 | <i>Proteobacteria</i> (genus unclear)                                                                                                                        | Nbs/5872  | contig01300 | Rieske alpha           | Benzoate dioxygenase                         | 55% <i>Rhodococcus</i> sp. 19070 (AAK58903)                  |
| Nbs-28 | <i>Gammaproteobacteria (Pseudomonas)</i>                                                                                                                     | Nbs/8642  | contig02594 | Rieske alpha           | Benzoate dioxygenase                         | 95% <i>Pseudomonas stutzeri</i> ATCC17588 (YP_004713948.1)   |
| Nbs-29 | <i>Gammaproteobacteria (Pseudomonas)</i>                                                                                                                     | Nbs/12117 | contig04720 | Rieske alpha           | Benzoate dioxygenase                         | 81% <i>Pseudomonas stutzeri</i> ATCC 17588 (YP_004713948.1)  |
| Nbs-30 | <i>Gammaproteobacteria (Pseudoxanthomonas)</i>                                                                                                               | Nbs/14388 | contig06426 | Rieske alpha           | Benzoate dioxygenase                         | 95% <i>Pseudoxanthomonas spadix</i> BD-a59 (YP_004931670.1)  |
| Nbs-31 | <i>Gammaproteobacteria (Pseudomonas)</i>                                                                                                                     | Nbs/9486  | contig03072 | Rieske alpha           | Benzoate dioxygenase                         | 92% <i>Pseudomonas putida</i> F1 (YP_001268212)              |
| Nbs-32 | <i>Gammaproteobacteria</i> (genus unclear)                                                                                                                   | Nbs/13022 | contig05352 | Rieske alpha           | Benzoate dioxygenase                         | 76% <i>Marinobacter manganoxydans</i> Mnl7-9 (ZP_09159757.1) |
|        |                                                                                                                                                              | Nbs/13021 | contig05352 | Rieske alpha           | Benzoate dioxygenase                         | 73% <i>Marinobacter manganoxydans</i> Mnl7-9 (ZP_09159757.1) |
| Nbs-33 | <i>Betaproteobacteria</i> (genus unclear)                                                                                                                    | Nbs/4996  | contig00982 | Rieske ferredoxin      | Benzoate dioxygenase                         | 94% <i>Burkholderia pseudomallei</i> DM98 (ZP_02408055.1)    |
| Nbs-34 | <i>Proteobacteria</i> - ORF too short (149 AA) for assigning phylogeny (similar homology for the 149 AA long fragment to different proteobacterial proteins) | Nbs/5871  | contig01300 | Rieske beta            | Benzoate dioxygenase                         | 67% <i>Neptuniibacter</i> sp. CAR-SF (BAG30836.1)            |
| Nbs-35 | <i>Betaproteobacteria (Achromobacter)</i>                                                                                                                    | Nbs/8011  | contig02255 | Other protein families | Phenol hydroxylase alpha subunit             | 81% LapN <i>Ralstonia pickettii</i> (AAB67108.1)             |
| Nbs-36 | <i>Gammaproteobacteria (Pseudomonas)</i>                                                                                                                     | Nbs/7718  | contig02108 | Other protein families | Phenol hydroxylase alpha subunit             | 94% LapM <i>Pseudomonas alkylphenolia</i> (AAP92391.1)       |
| Nbs-37 | <i>Gammaproteobacteria (Pseudomonas)</i>                                                                                                                     | Nbs/7719  | contig02108 | Other protein families | Phenol hydroxylase alpha subunit             | 90% LapN <i>Pseudomonas putida</i> (BAC75404.1)              |
| Nbs-38 | <i>Gammaproteobacteria (Pseudomonas)</i>                                                                                                                     | Nbs/2202  | contig00257 | EXDO                   | Catechol 2,3-dioxygenase (Pseudomonads-like) | 100% <i>Pseudomonas</i> sp. 1YB2 (CAD67837.2)                |
| Nbs-39 | <i>Gammaproteobacteria (Pseudomonas)</i>                                                                                                                     | Nbs/6395  | contig01501 | EXDO                   | Catechol 2,3-dioxygenase (Pseudomonads-like) | Lapb <i>Pseudomonas</i> sp. K128 (PDB 3HPV_A)                |

|        |                                                                                                                                                                                                               |                  |             |                            |                                                                                                         |                                                                              |
|--------|---------------------------------------------------------------------------------------------------------------------------------------------------------------------------------------------------------------|------------------|-------------|----------------------------|---------------------------------------------------------------------------------------------------------|------------------------------------------------------------------------------|
| Nbs-40 | Homology lower than 50% for assigning phylogeny                                                                                                                                                               | Nbs/7244         | contig01875 | EXDO                       | Catechol 2,3-dioxygenase                                                                                | 32% <i>Streptomyces bingchenggensis</i> _BCW-1 (ADI04647 and YP_004959778.1) |
| Nbs-41 | <i>Firmicutes</i>                                                                                                                                                                                             | Nbs/7811         | contig02153 | EXDO                       | Catechol 2,3-dioxygenase (Bacillus-like)                                                                | 87% <i>Bacillus tusciae</i> DSM2912 (YP_003590157)                           |
| Nbs-42 | <i>Gammaproteobacteria</i> ( <i>Pseudomonas</i> )                                                                                                                                                             | Nbs/16157        | contig07952 | EXDO                       | Catechol 2,3-dioxygenase of Proteobacteria EXDO_D (EXDO 1.2C according to Eltis)                        | 77% <i>Pseudomonas putida</i> (CAA42452)                                     |
| Nbs-43 | <i>Gammaproteobacteria</i> ( <i>Pseudomonas</i> )                                                                                                                                                             | Nbs/17776        | contig09609 | EXDO                       | Catechol 2,3-dioxygenase (Pseudomonads-like)                                                            | 92% <i>Pseudomonas fluorescens</i> (AAW81687.1)                              |
| Nbs-44 | <i>Gammaproteobacteria</i> ( <i>Azotobacter</i> )                                                                                                                                                             | Nbs/18042        | contig09918 | EXDO                       | Catechol 2,3-dioxygenase (Pseudomonads-like)                                                            | 79% LapB <i>Azotobacter vinelandii</i> DJ (YP_002800217)                     |
| Nbs-45 | <i>Gammaproteobacteria</i> ( <i>Pseudomonas</i> )                                                                                                                                                             | <b>Nbs/17777</b> | contig07576 | EXDO                       | Catechol 2,3-dioxygenase of Proteobacteria EXDO_D (EXDO 1.2C according to Eltis)                        | 72% <i>Pseudomonas fluorescens</i> (AAW81687.1)                              |
| Nbs-46 | <i>Betaproteobacteria</i> (genus unclear)                                                                                                                                                                     | Nbs/17781        | contig09615 | EXDO                       | Catechol 2,3-dioxygenases of <i>Proteobacteria</i> EXDO A, B and C (EXDO 1.2A and B according to Eltis) | 78% <i>Azotobacter vinelandii</i> DJ (YP_002798088.1)                        |
| Nbs-47 | <i>Gammaproteobacteria</i> ( <i>Pseudomonas</i> )                                                                                                                                                             | Nbs/7685         | contig02092 | INTRA                      | Catechol 1,2-dioxygenase                                                                                | 88% <i>Pseudomonas stutzeri</i> ATCC 17588 (YP_004713954.1)                  |
| Nbs-48 | <i>Betaproteobacteria</i> (genus unclear)                                                                                                                                                                     | Nbs/8920         | contig02755 | INTRA                      | Catechol 1,2-dioxygenase                                                                                | 66% <i>Burkholderia gladioli</i> BSR3 (YP_004350183.1)                       |
| Nbs-49 | <i>Gammaproteobacteria</i> ( <i>Pseudomonas</i> )                                                                                                                                                             | Nbs/18051        | contig09929 | INTRA                      | Catechol 1,2-dioxygenase                                                                                | 84% <i>Pseudomonas stutzeri</i> A1501 (YP_001172200)                         |
| Nbs-50 | <i>Gammaproteobacteria</i> ( <i>Pseudomonas</i> )                                                                                                                                                             | Nbs/18099        | contig09988 | INTRA                      | Catechol 1,2-dioxygenase                                                                                | 86% <i>Pseudomonas stutzeri</i> ATCC 17588 (YP_004713954.1)                  |
| Nbs-51 | <i>Alphaproteobacteria</i> ( <i>Rhizobium</i> / <i>Azospirillum</i> )                                                                                                                                         | Nbs/12122        | contig04724 | INTRA                      | Catechol 1,2-dioxygenase                                                                                | 73% <i>Rhizobium leguminosarum</i> bv. viciae 3841 (YP_764725)               |
| Nbs-52 | <i>Betaproteobacteria</i> (genus unclear)                                                                                                                                                                     | Nbs/3467         | contig00528 | LigB                       | Protocatechuate 4,5-dioxygenase subunit alpha                                                           | 87% <i>Azoarcus</i> sp. BH72 (YP_934042.1)                                   |
| Nbs-53 | <i>Betaproteobacteria</i> (genus unclear)                                                                                                                                                                     | Nbs/3466         | contig00528 | LigB                       | Protocatechuate 4,5-dioxygenase                                                                         | 78% <i>Delftia</i> sp. Cs1-4 (YP_004487058.1)                                |
| Nbs-54 | <i>Actinobacteria</i> / <i>Alphaproteobacteria</i> - ORF too short (123 AA) for assigning phylogeny (similar homology for the 149 AA long fragment to different actinobacterial and proteobacterial proteins) | Nbs/16581        | contig08349 | LigB                       | Protocatechuate 4,5-dioxygenase                                                                         | 38% <i>Mycobacterium</i> sp. KMS (YP_937705; YP_937705; YP_935611)           |
| Nbs-55 | <i>Betaproteobacteria</i> (genus unclear)                                                                                                                                                                     | Nbs/12309        | contig04851 | LigB                       | Homoprotocatechuate dioxygenase (unknown function)                                                      | 69% <i>Anaerolinea thermophila</i> UNI-1 (YP_004173079.1)                    |
| Nbs-56 | <i>Gammaproteobacteria</i> ( <i>Pseudomonas</i> )                                                                                                                                                             | Nbs/14384        | contig06425 | Rieske                     | Carbazol dioxygenase                                                                                    | 69% <i>Pseudomonas stutzeri</i> ATCC 17588 (YP_004715686.1)                  |
| Nbs-57 | <i>Gammaproteobacteria</i> ( <i>Pseudomonas</i> )                                                                                                                                                             | Nbs/5721         | contig01243 | Flavoprotein monooxygenase | 4-Hydroxybenzoate 3-hydroxylase                                                                         | 69% <i>Pseudomonas fluorescens</i> (1BGN_A)                                  |
| Nbs-58 | <i>Gammaproteobacteria</i> ( <i>Pseudomonas</i> )                                                                                                                                                             | Nbs/1332         | contig00115 | Regulator                  | LysR family transcriptional regulator                                                                   | 91% <i>Pseudomonas stutzeri</i> ATCC 14405 (EHY79459.1)                      |
| Nbs-59 | <i>Gammaproteobacteria</i> ( <i>Pseudomonas</i> )                                                                                                                                                             | Nbs/13567        | contig00124 | Regulator                  | LysR family transcriptional regulator                                                                   | 85% <i>Pseudomonas stutzeri</i> ATCC 14405 (AEA84304.1)                      |



|        |                                            |           |             |                        |                                       |                                                                             |
|--------|--------------------------------------------|-----------|-------------|------------------------|---------------------------------------|-----------------------------------------------------------------------------|
| Nbs-60 | <i>Gammaproteobacteria (Pseudomonas)</i>   | Nbs/2539  | contig00319 | Regulator              | LysR family transcriptional regulator | 52% <i>Pseudomonas syringae</i> pv. <i>phaseolicola</i> 1448A (YP_274501.1) |
| Nbs-61 | <i>Gammaproteobacteria</i> (genus unclear) | Nbs/2616  | contig00334 | Regulator              | LysR family transcriptional regulator | 66% <i>Shewanella sediminis</i> HAW-EB3 (YP_001475964.1)                    |
| Nbs-62 | <i>Gammaproteobacteria (Pseudomonas)</i>   | Nbs/4668  | contig00875 | Regulator              | LysR family transcriptional regulator | 96% <i>Pseudomonas stutzeri</i> ATCC 14405 (EHY78223.1)                     |
| Nbs-63 | <i>Betaproteobacteria (Achromobacter)</i>  | Nbs/4999  | contig00982 | Regulator              | LysR family transcriptional regulator | 75% <i>Ralstonia solanacearum</i> Po82 (AEG69165.1)                         |
| Nbs-64 | <i>Betaproteobacteria</i> (genus unclear)  | Nbs/5152  | contig01035 | Regulator              | LysR family transcriptional regulator | 73% <i>Neisseria shayeganii</i> 871 (ZP_08886506.1)                         |
| Nbs-65 | <i>Gammaproteobacteria (Pseudomonas)</i>   | Nbs/5865  | contig01298 | Regulator              | LysR family transcriptional regulator | 99% <i>Pseudomonas stutzeri</i> ATCC 14405 (EHY75813.1)                     |
| Nbs-66 | <i>Gammaproteobacteria (Pseudomonas)</i>   | Nbs/6080  | contig01575 | Regulator              | LysR family transcriptional regulator | 72% <i>Pseudomonas stutzeri</i> ATCC 14405 (EHY79459.1)                     |
| Nbs-67 | <i>Betaproteobacteria</i> (genus unclear)  | Nbs/6635  | contig01600 | Regulator              | LysR family transcriptional regulator | 64% <i>Advenella kashmirensis</i> WT001 (ZP_09478423.1)                     |
| Nbs-68 | <i>Betaproteobacteria</i> (genus unclear)  | Nbs/7081  | contig01805 | Regulator              | LysR family transcriptional regulator | 83% <i>Advenella kashmirensis</i> WT001 (ZP_09478363.1)                     |
| Nbs-69 | <i>Betaproteobacteria</i> (genus unclear)  | Nbs/8417  | contig02464 | Regulator              | LysR family transcriptional regulator | 65% <i>Advenella kashmirensis</i> WT001 (ZP_09478104.1)                     |
| Nbs-70 | <i>Gammaproteobacteria (Pseudomonas)</i>   | Nbs/9116  | contig02868 | Regulator              | LysR family transcriptional regulator | 98% <i>Pseudomonas stutzeri</i> A1501 (YP_001173593.1)                      |
| Nbs-71 | <i>Gammaproteobacteria (Pseudomonas)</i>   | Nbs/10186 | contig03475 | Regulator              | LysR family transcriptional regulator | 72% <i>Pseudomonas fulva</i> 12-X (YP_004473340.1)                          |
| Nbs-72 | <i>Betaproteobacteria</i> (genus unclear)  | Nbs/11187 | contig04110 | Regulator              | LysR family transcriptional regulator | 72% <i>Burkholderia</i> sp. CCGE1003 (YP_003909685.1)                       |
| Nbs-73 | <i>Gammaproteobacteria (Pseudomonas)</i>   | Nbs/11486 | contig04304 | Regulator              | LysR family transcriptional regulator | 85% <i>Pseudomonas mendocina</i> ymp (YP_001187511.1)                       |
| Nbs-74 | <i>Betaproteobacteria (Achromobacter)</i>  | Nbs/11557 | contig04352 | Regulator              | LysR family transcriptional regulator | 79% <i>Achromobacter xylosoxidans</i> A8 (YP_003977787.1)                   |
| Nbs-75 | <i>Gammaproteobacteria (Pseudomonas)</i>   | Nbs/13451 | contig05768 | Regulator              | LysR family transcriptional regulator | 100% <i>Pseudomonas stutzeri</i> ATCC 17588 (YP_004716500.1)                |
| Nbs-76 | <i>Gammaproteobacteria (Pseudomonas)</i>   | Nbs/14525 | contig06548 | Regulator              | LysR family transcriptional regulator | 82% <i>Pseudomonas stutzeri</i> ATCC 17588 (YP_004714404.1)                 |
| Nbs-77 | <i>Betaproteobacteria</i> (genus unclear)  | Nbs/14961 | contig06910 | Regulator              | LysR family transcriptional regulator | 61% <i>Pusillimonas</i> sp. T7-7 (YP_004416250.1)                           |
| Nbs-78 | <i>Firmicutes (Clostridium)</i>            | Nbs/15469 | contig07138 | Regulator              | LysR family transcriptional regulator | 54% <i>Clostridium</i> sp. D5 (ZP_08131246.1)                               |
| Nbs-79 | <i>Gammaproteobacteria (Pseudomonas)</i>   | Nbs/15469 | contig07340 | Regulator              | LysR family transcriptional regulator | 99% <i>Pseudomonas putida</i> S16 (YP_004700228.1)                          |
| Nbs-80 | <i>Gammaproteobacteria (Azotobacter)</i>   | Nbs/15868 | contig07702 | Regulator              | LysR family transcriptional regulator | 86% <i>Azotobacter vinelandii</i> DJ (YP_002801308.1)                       |
| Nbs-81 | <i>Gammaproteobacteria (Pseudomonas)</i>   | Nbs/18359 | contig00233 | Regulator              | LysR family transcriptional regulator | 57% <i>Pseudomonas aeruginosa</i> PA7 (YP_001348799.1)                      |
| Nbs-82 | <i>Gammaproteobacteria (Pseudomonas)</i>   | Nbs/9636  | contig03158 | Other protein families | Muconate cycloisomerase               | 96% <i>Pseudomonas stutzeri</i> ATCC 17588 (YP_004713952.1)                 |

|         |                                                |           |             |                                               |                                                            |                                                              |
|---------|------------------------------------------------|-----------|-------------|-----------------------------------------------|------------------------------------------------------------|--------------------------------------------------------------|
| Nbs-83  | <i>Gammaproteobacteria (Pseudomonas)</i>       | Nbs/0346  | contig00020 | Other protein families (isomerase)            | 2-Hydroxychromene-2-carboxylate isomerase                  | 100% <i>Pseudomonas stutzeri</i> (AAD02142.1)                |
| Nbs-84  | <i>Gammaproteobacteria (Pseudomonas)</i>       | Nbs/12628 | contig05075 | Other protein families (isomerase)            | 2-Hydroxychromene-2-carboxylate isomerase                  | 74% <i>Pseudomonas aeruginosa</i> PAb1 (ZP_06876104.1)       |
| Nbs-85  | <i>Betaproteobacteria (Achromobacter)</i>      | Nbs/13166 | contig05458 | Other protein families (isomerase)            | 2-Hydroxychromene-2-carboxylate isomerase                  | 72% <i>Ralstonia</i> sp. U2 (AAD12617.1)                     |
| Nbs-86  | <i>Gammaproteobacteria (Pseudomonas)</i>       | Nbs/0349  | contig00020 | Other protein families (dehydrogenase)        | Salicylaldehyde dehydrogenase                              | 99% <i>Pseudomonas stutzeri</i> (AAD02139.1)                 |
| Nbs-87  | <i>Betaproteobacteria (Polaromonas)</i>        | Nbs/6699  | contig01626 | Other protein families (dehydrogenase)        | Salicylaldehyde dehydrogenase                              | 99% <i>Polaromonas naphthalenivorans</i> CJ2 (YP_982707.1)   |
| Nbs-88  | <i>Bacteroidetes/Chlorobi (Bacteroides)</i>    | Nbs/10177 | contig03468 | Other protein families (isomerase)            | Muconate cycloisomerase                                    | 60% <i>Bacteroides</i> sp. 3_2_5 (ZP_04842137.1)             |
| Nbs-89  | <i>Bacteroidetes/Chlorobi (Bacteroides)</i>    | Nbs/11141 | contig04082 | Other protein families (isomerase)            | Muconate cycloisomerase                                    | 72% <i>Bacteroides fragilis</i> YCH46 (YP_100030.1)          |
|         | <i>Gammaproteobacteria (Pseudomonas)</i>       | Nbs/19441 | contig11724 | Other protein families (isomerase)            | Muconate cycloisomerase                                    | 89% <i>Pseudomonas stutzeri</i> ATCC 17588 (YP_004713952.1)  |
| Nbs-90  | <i>Betaproteobacteria</i> (genus unclear)      | Nbs/13304 | contig05566 | Other protein families                        | Maley acetate reductase                                    | 57% <i>Polaromonas</i> sp JS666B (CP000316; YP_548891.1)     |
| Nbs-91  | <i>Betaproteobacteria (Polaromonas)</i>        | Nbs/13304 | contig05566 | Other protein families (reductase)            | Maleylacetate reductase                                    | 57% <i>Polaromonas</i> sp. JS666 (YP_548891.1)               |
| Nbs-92  | <i>Gammaproteobacteria (Pseudomonas)</i>       | Nbs/6412  | contig01507 | Other protein families (non-heme dioxygenase) | 4-Hydroxyphenylpyruvate dioxygenase                        | 99% <i>Pseudomonas stutzeri</i> ATCC 14405 (EHY76970.1)      |
| Nbs-93  | <i>Betaproteobacteria (Achromobacter)</i>      | Nbs/13523 | contig05736 | Other protein families (non-heme dioxygenase) | 4-Hydroxyphenylpyruvate dioxygenase                        | 85% <i>Achromobacter arsenitoxydans</i> SY8 (ZP_09298025.1)  |
| Nbs-94  | <i>Betaproteobacteria (Achromobacter)</i>      | Nbs/14476 | contig06506 | Other protein families (non-heme dioxygenase) | 4-Hydroxyphenylpyruvate dioxygenase                        | 85% <i>Achromobacter xylooxidans</i> C54 (EFV83067.1)        |
| Nbs-95  | <i>Firmicutes</i> (genus unclear)              | Nbs/3821  | contig00621 | Other protein families (lyase)                | 2-Oxopent-4-enoate hydratase/fumarylacetoacetate hydrolase | 60% <i>Anaerolinea thermophila</i> UNI-1 (YP_004173999.1)    |
| Nbs-96  | <i>Gammaproteobacteria (Pseudomonas)</i>       | Nbs/13150 | contig05447 | Other protein families (lyase)                | 2-Oxopent-4-enoate hydratase/fumarylacetoacetate hydrolase | 70% <i>Pseudomonas putida</i> W619 (YP_001748852.1)          |
| Nbs-97  | <i>Gammaproteobacteria (Pseudomonas)</i>       | Nbs/15955 | contig07774 | Other protein families (lyase)                | 2-Oxopent-4-enoate hydratase/fumarylacetoacetate hydrolase | 93% <i>Pseudomonas alkylphenolia</i> (AAP92396.1)            |
| Nbs-98  | <i>Gammaproteobacteria (Pseudomonas)</i>       | Nbs/10105 | contig03427 | Other protein families (tautomerase)          | 4-Oxalocrotonate tautomerase                               | 98% <i>Pseudomonas putida</i> (AAQ89682.1)                   |
| Nbs-99  | <i>Gammaproteobacteria (Pseudoxanthomonas)</i> | Nbs/10847 | contig03888 | Other protein families (tautomerase)          | 4-Oxalocrotonate tautomerase                               | 100% <i>Pseudoxanthomonas spadix</i> BD-a59 (YP_004930525.1) |
| Nbs-100 | <i>Gammaproteobacteria (Pseudomonas)</i>       | Nbs/6273  | contig01450 | Other protein families (aldolase)             | 4-Hydroxy 2-oxovalerate aldolase                           | 86% <i>Pseudomonas putida</i> (NP_542861.1)                  |
| Nbs-101 | <i>Gammaproteobacteria (Pseudomonas)</i>       | Nbs/9038  | contig02820 | Other protein families (aldolase)             | 4-Hydroxy 2-oxovalerate aldolase                           | 91% <i>Pseudomonas putida</i> (BAD19055.1)                   |
| Nbs-102 | <i>Gammaproteobacteria (Pseudomonas)</i>       | Nbs/13881 | contig06025 | Other protein families (aldolase)             | 4-Hydroxy 2-oxovalerate aldolase                           | 95% <i>Pseudomonas putida</i> F1 (YP_001268202.1)            |
| Nbs-103 | <i>Gammaproteobacteria (Pseudoxanthomonas)</i> | Nbs/16383 | contig08171 | Other protein families (aldolase)             | 4-Hydroxy 2-oxovalerate aldolase                           | 100% <i>Pseudoxanthomonas spadix</i> BD-a59                  |

|         |                                                            |           |             |                                           |                                                                    |                                                                           |
|---------|------------------------------------------------------------|-----------|-------------|-------------------------------------------|--------------------------------------------------------------------|---------------------------------------------------------------------------|
|         |                                                            |           |             |                                           |                                                                    | (YP_004930564.1)                                                          |
| Nbs-104 | <i>Gammaproteobacteria</i><br>( <i>Pseudomonas</i> )       | Nbs/4424  | contig00798 | Other protein families<br>(aldolase)      | 4-Hydroxy 2-oxovalerate aldolase                                   | 100% <i>Pseudomonas putida</i><br>(Q9Z156.1)                              |
| Nbs-105 | <i>Gammaproteobacteria</i><br>( <i>Pseudomonas</i> )       | Nbs/8785  | contig02681 | Other protein families<br>(lyase)         | 4-Oxalocrotonate<br>decarboxylase/fumarylacetoacetate<br>hydrolase | 88% <i>Pseudomonas</i><br><i>alkylphenolia</i> (AAP92397.1)               |
| Nbs-106 | <i>Gammaproteobacteria</i><br>( <i>Pseudoxanthomonas</i> ) | Nbs/10846 | contig03888 | Other protein families<br>(lyase)         | 4-Oxalocrotonate<br>decarboxylase/fumarylacetoacetate<br>hydrolase | 99% <i>Pseudoxanthomonas</i><br><i>spadix</i> BD-a59<br>(YP_004930524.1)  |
| Nbs-107 | <i>Gammaproteobacteria</i><br>( <i>Pseudomonas</i> )       | Nbs/13828 | contig05983 | Other protein families<br>(lyase)         | 4-Oxalocrotonate<br>decarboxylase/fumarylacetoacetate<br>hydrolase | 99% <i>Pseudomonas putida</i><br>(AAQ89681.1)                             |
| Nbs-108 | <i>Gammaproteobacteria</i><br>( <i>Pseudoxanthomonas</i> ) | Nbs/13949 | contig06074 | Other protein families<br>(lyase)         | 4-Oxalocrotonate<br>decarboxylase/fumarylacetoacetate<br>hydrolase | 100% <i>Pseudoxanthomonas</i><br><i>spadix</i> BD-a59<br>(YP_004930523.1) |
| Nbs-109 | <i>Gammaproteobacteria</i><br>( <i>Pseudomonas</i> )       | Nbs/14206 | contig06280 | Other protein families<br>(lyase)         | 4-Oxalocrotonate<br>decarboxylase/fumarylacetoacetate<br>hydrolase | 98% <i>Pseudomonas putida</i><br>(AAQ89682.1) (YP_709353.1)               |
| Nbs-110 | <i>Gammaproteobacteria</i><br>( <i>Pseudomonas</i> )       | Nbs/4424  | contig00798 | Other protein families<br>(lyase)         | 4-Oxalocrotonate<br>decarboxylase/fumarylacetoacetate<br>hydrolase | 100% <i>Pseudomonas stutzeri</i><br>(AAD02151.1)                          |
| Nbs-111 | <i>Gammaproteobacteria</i><br>( <i>Pseudomonas</i> )       | Nbs/4425  | contig02681 | Other protein families<br>(dehydrogenase) | Acetaldehyde dehydrogenase                                         | 91% <i>Pseudomonas</i><br><i>alkylphenolia</i> (AAP92399.1)               |
| Nbs-112 | <i>Gammaproteobacteria</i><br>( <i>Pseudomonas</i> )       | Nbs/9039  | contig02820 | Other protein families<br>(dehydrogenase) | Acetaldehyde dehydrogenase                                         | 91% <i>Azotobacter vinelandii</i> DJ<br>(JYP_002800198.1)                 |
| Nbs-113 | <i>Gammaproteobacteria</i><br>( <i>Pseudomonas</i> )       | Nbs/13882 | contig06025 | Other protein families<br>(dehydrogenase) | Acetaldehyde dehydrogenase                                         | 95% <i>Pseudomonas putida</i> F1<br>(YP_001268203.1)                      |
| Nbs-114 | <i>Gammaproteobacteria</i><br>( <i>Pseudomonas</i> )       | Nbs/4425  | contig00798 | Other protein families<br>(dehydrogenase) | Acetaldehyde dehydrogenase                                         | 100% <i>Pseudomonas stutzeri</i><br>(Q9Z157.1)                            |
| Nbs-115 | <i>Gammaproteobacteria</i><br>( <i>Pseudomonas</i> )       | Nbs/6272  | contig01450 | Other protein families<br>(dehydrogenase) | Acetaldehyde dehydrogenase                                         | 90% <i>Pseudomonas putida</i><br>(YP_709351.1)                            |

<sup>1</sup>We might have overestimated the number of proteins in our metaproteomes by double counting of the fragmented open reading frames in the meta-sequences that were derived from the same gene/protein. In addition, some of the proteins (i.e. dioxygenases) herein investigated are formed by different subunits, that all together form a single protein. To take both issues into consideration the amino acid sequences of proteins with biochemical functions shown to be potentially involved in biodegradation, as suggested by in-house database-BLAST search, were manually BLAST and aligned to the best protein hit in the database to ensure identification of fragments most likely belonging to the same sequence/protein (see first column; “list of unique proteins”). As example, the protein named Nbs-31 (see first column; “list of unique proteins”) represents a single benzoate dioxygenase that contain two fragments (Nbs/11815 and Nbs/11816) located in same contig but having a frame shift. The protein ID (ORF) and contig where the gene was found within the pyro-sequences are specifically shown.

<sup>2</sup>For taxonomic assignment complete genome sequences were obtained from NCBI and used to map the contigs containing the gene coding the protein(s) with biochemical functions shown to be potentially involved in biodegradation.

<sup>3</sup>Functional assignment of the predicted genes involved in degradation was made on the basis of BLASTP analysis against an in-house database that contained gene sequences encoding enzymes that usually perform key catalysing steps in the aerobic degradation of pollutants via di- and trihydroxylated intermediates (Table S8). These enzymes included the following FAMILIES: Rieske non-heme iron oxygenases, type I extradiol dioxygenases of the vicinal oxygen chelate superfamily, the type II or LigB superfamily extradiol dioxygenases, and the type III extradiol dioxygenases belonging to the cupin superfamily as well as intradiol dioxygenases. SUBFAMILIES refer to the specific subfamily within FAMILIES assigned to the protein of interest.

<sup>4</sup>Accession number for the best in-house database/NCBI BLAST hit is specifically shown.

**Table S6** Proteins of CN1 and CN2 communities identified and quantified by metaproteomic approaches. Protein annotation is specifically shown. The 816 most abundant proteins, among a total number of 1116, are listed below. For raw data, please contact authors directly.

| Contig ID <sup>1</sup> | Protein ID <sup>1</sup>                                            | Quantitative Value CN1 <sup>2</sup> | Quantitative Value CN2 <sup>2</sup> | Rel conc. CN1 (%) <sup>2</sup> | Rel conc. CN2 (%) <sup>2</sup> | Sequence Coverage [%] <sup>1</sup> | Sequence Length <sup>1</sup> | PEP <sup>3</sup> |
|------------------------|--------------------------------------------------------------------|-------------------------------------|-------------------------------------|--------------------------------|--------------------------------|------------------------------------|------------------------------|------------------|
| CN2/15081              | pyridoxamine 5'-phosphate oxidase [EC:1.4.3.5]                     | 0                                   | 1882812.51                          | 0.0000                         | 0.0587                         | 39.1                               | 215                          | 3.1186E-20       |
| CN2/17055              | 4-hydroxythreonine-4-phosphate dehydrogenase [EC:1.1.1.262]        | 0                                   | 2911516.89                          | 0.0000                         | 0.0908                         | 6.4                                | 329                          | 0.00031214       |
| CN2/3894               | erythronate-4-phosphate dehydrogenase [EC:1.1.1.290]               | 0                                   | 167456.45                           | 0.0000                         | 0.0052                         | 8.7                                | 380                          | 5.619E-08        |
| CN1/27032              | outer membrane protein OmpU                                        | 14407179.48                         | 0                                   | 1.3173                         | 0.0000                         | 22.4                               | 277                          | 4.0763E-149      |
| CN2/0960               | 3-hydroxyisobutyrate dehydrogenase [EC:1.1.1.31]                   | 231897.30                           | 3825444.01                          | 0.0212                         | 0.1193                         | 40.8                               | 299                          | 2.4653E-147      |
| CN2/18291              | 3-hydroxyisobutyrate dehydrogenase [EC:1.1.1.31]                   | 0                                   | 710782.80                           | 0.0000                         | 0.0222                         | 21.1                               | 294                          | 6.8887E-39       |
| CN2/0869               | 3-isopropylmalate dehydrogenase [EC:1.1.1.85]                      | 310579.92                           | 1422731.95                          | 0.0284                         | 0.0444                         | 31.4                               | 360                          | 6.1985E-67       |
| CN1/20728              | 3-isopropylmalate dehydrogenase [EC:1.1.1.85]                      | 1325725.07                          | 0                                   | 0.1212                         | 0.0000                         | 10.9                               | 349                          | 2.4663E-07       |
| CN2/0783               | 3-demethylubiquinone-9 3-methyltransferase [EC:2.1.1.- 2.1.1.64]   | 54570.04                            | 2601783.80                          | 0.0050                         | 0.0812                         | 55.6                               | 232                          | 3.4007E-74       |
| CN2/17744              | ubiquinone/menaquinone biosynthesis methyltransferase [EC:2.1.1.-] | 0                                   | 618305.83                           | 0.0000                         | 0.0193                         | 15.2                               | 256                          | 8.4864E-06       |
| CN2/16713              | Gentisate dioxygenase                                              | 131660.58                           | 20882908.95                         | 0.0120                         | 0.6514                         | 73.2                               | 347                          | 0                |
| CN2/16712              | Fumarylpyruvate hydrolase                                          | 2065760.52                          | 17048900.21                         | 0.1889                         | 0.5318                         | 49.4                               | 231                          | 8.3934E-100      |
| CN1/14425              | acylpyruvate hydrolase [EC:3.7.1.5]                                | 950218.17                           | 1071446.20                          | 0.0869                         | 0.0334                         | 30                                 | 190                          | 1.1181E-12       |
| CN1/23999              | Gentisate dioxygenase                                              | 21941841.03                         | 14450193.18                         | 2.0062                         | 0.4507                         | 63.6                               | 55                           | 2.2886E-23       |
| CN1/6354               | Gentisate dioxygenase                                              | 21005131.05                         | 12753406.93                         | 1.9205                         | 0.3978                         | 35.6                               | 191                          | 6.9311E-127      |
| CN2/3389               | Fumarylpyruvate hydrolase                                          | 5533982.89                          | 0                                   | 0.5060                         | 0.0000                         | 46.7                               | 90                           | 1.8627E-43       |
| CN1/3872               | Gentisate dioxygenase                                              | 3608315.64                          | 0                                   | 0.3299                         | 0.0000                         | 10.1                               | 346                          | 2.1153E-06       |
| CN1/23316              | C4-dicarboxylate-binding protein DctP                              | 1331164.23                          | 137698.96                           | 0.1217                         | 0.0043                         | 41.9                               | 124                          | 1.7775E-17       |
| CN1/25779              | putative tricarboxylic transport membrane protein                  | 2402357.22                          | 1882130.83                          | 0.2197                         | 0.0587                         | 23.4                               | 175                          | 2.0775E-51       |
| CN1/20966              | C4-dicarboxylate-binding protein DctP                              | 13767763.74                         | 126076.58                           | 1.2588                         | 0.0039                         | 57.9                               | 340                          | 3.862E-108       |
| CN1/23240              | phosphoglycerate transport regulatory protein PgtC                 | 4978799.30                          | 489750.33                           | 0.4552                         | 0.0153                         | 27.9                               | 341                          | 1.0556E-32       |
| CN1/21648              | C4-dicarboxylate-binding protein DctP                              | 1104116.09                          | 0                                   | 0.1010                         | 0.0000                         | 20                                 | 325                          | 3.1874E-12       |
| CN2/17891              | C4-dicarboxylate-binding protein DctP                              | 56941.18                            | 17565303.35                         | 0.0052                         | 0.5479                         | 70.1                               | 331                          | 0                |
| CN1/9660               | C4-dicarboxylate-binding protein DctP                              | 2422204.74                          | 98994.71                            | 0.2215                         | 0.0031                         | 36.4                               | 173                          | 2.3756E-33       |
| CN2/13571              | cysteine desulfurase [EC:2.8.1.7]                                  | 36477.68                            | 1053425.95                          | 0.0033                         | 0.0329                         | 7.2                                | 404                          | 8.3251E-07       |
| CN2/14529              | 1-deoxy-D-xylulose-5-phosphate synthase [EC:2.2.1.7]               | 0                                   | 998689.72                           | 0.0000                         | 0.0311                         | 6.8                                | 632                          | 6.1754E-07       |
| CN2/14147              | sulfite reductase (NADPH) hemoprotein beta-component [EC:1.8.1.2]  | 515786.96                           | 1551134.69                          | 0.0472                         | 0.0484                         | 26.3                               | 552                          | 5.0207E-134      |
| CN2/16708              | Fumarylpyruvate hydrolase                                          | 40749.39                            | 6930602.57                          | 0.0037                         | 0.2162                         | 49.1                               | 216                          | 2.2104E-122      |
| CN2/2666               | 1,4-alpha-glucan branching enzyme [EC:2.4.1.18]                    | 13227.62                            | 1735778.01                          | 0.0012                         | 0.0541                         | 20.8                               | 736                          | 9.0884E-27       |
| CN2/4159               | alpha-amylase [EC:3.2.1.1]                                         | 0                                   | 1436607.87                          | 0.0000                         | 0.0448                         | 12.7                               | 667                          | 8.2037E-14       |
| CN2/4160               | maltose alpha-D-glucosyltransferase [EC:5.4.99.16]                 | 0                                   | 263478.19                           | 0.0000                         | 0.0082                         | 4.2                                | 1106                         | 1.2942E-32       |
| CN2/5230               | cysteine desulfurase / selenocysteine lyase [EC:2.8.1.7 4.4.1.16]  | 0                                   | 609379.84                           | 0.0000                         | 0.0190                         | 11.3                               | 337                          | 3.8697E-13       |
| CN2/17124              | RNA polymerase sigma-70 factor, ECF subfamily                      | 0                                   | 3520443.17                          | 0.0000                         | 0.1098                         | 21.2                               | 193                          | 1.1876E-101      |
| CN1/9324               | chaperonin GroEL                                                   | 0                                   | 1613359.60                          | 0.0000                         | 0.0503                         | 29.3                               | 116                          | 3.0529E-07       |
| CN2/4031               | chaperonin GroEL                                                   | 0.00                                | 3183710.81                          | 0.0000                         | 0.0993                         | 30.1                               | 209                          | 2.0129E-21       |
| CN1/13133              | molecular chaperone DnaK                                           | 1844968.56                          | 1193837.30                          | 0.1687                         | 0.0372                         | 18.9                               | 492                          | 2.9103E-73       |
| CN1/18429              | chaperonin GroEL                                                   | 3961.08                             | 16628.43                            | 0.0004                         | 0.0005                         | 17.8                               | 348                          | 2.1114E-35       |
| CN2/14323              | ATP-dependent RNA helicase DeaD                                    | 0                                   | 1058558.97                          | 0.0000                         | 0.0330                         | 8.6                                | 556                          | 3.2325E-07       |
| CN2/14484              | host factor-I protein                                              | 0                                   | 2872118.05                          | 0.0000                         | 0.0896                         | 47.6                               | 84                           | 7.0627E-20       |
| CN2/12280              | molecular chaperone DnaK                                           | 233076.10                           | 20624368.01                         | 0.0213                         | 0.6433                         | 61.5                               | 637                          | 0                |
| CN2/18240              | ribonuclease E [EC:3.1.26.12]                                      | 0                                   | 2068087.78                          | 0.0000                         | 0.0645                         | 10.8                               | 1008                         | 2.4128E-38       |

|           |                                                              |             |             |        |        |      |     |             |
|-----------|--------------------------------------------------------------|-------------|-------------|--------|--------|------|-----|-------------|
| CN2/17619 | transcription termination factor Rho                         | 84508.40    | 1126283.29  | 0.0077 | 0.0351 | 25.8 | 419 | 5.1957E-53  |
| CN2/0474  | chaperonin GroEL                                             | 372759.02   | 18806642.42 | 0.0341 | 0.5866 | 91.6 | 546 | 0           |
| CN1/25232 | chaperonin GroEL                                             | 909839.79   | 214510.92   | 0.0832 | 0.0067 | 22.9 | 279 | 7.6251E-16  |
| CN1/26923 | chaperonin GroEL                                             | 1041854.30  | 389610.81   | 0.0953 | 0.0122 | 39.6 | 53  | 0.0020169   |
| CN1/24862 | chaperonin GroEL                                             | 415368.45   | 1860106.82  | 0.0380 | 0.0580 | 36.3 | 245 | 7.2933E-59  |
| CN1/18243 | small subunit ribosomal protein S7                           | 0           | 4810586.34  | 0.0000 | 0.1500 | 22.9 | 170 | 0.00019616  |
| CN2/4130  | large subunit ribosomal protein L1                           | 852972.28   | 0           | 0.0780 | 0.0000 | 22.3 | 233 | 1.5129E-185 |
| CN1/1687  | large subunit ribosomal protein L7/L12                       | 11601813.46 | 0           | 1.0608 | 0.0000 | 23.4 | 124 | 2.3961E-51  |
| CN2/11678 | large subunit ribosomal protein L7/L12                       | 0           | 11056479.44 | 0.0000 | 0.3449 | 39.3 | 122 | 4.9795E-34  |
| CN2/11679 | large subunit ribosomal protein L10                          | 0           | 7663592.46  | 0.0000 | 0.2390 | 32.5 | 166 | 6.6914E-39  |
| CN2/11680 | large subunit ribosomal protein L1                           | 52740.69    | 9172087.12  | 0.0048 | 0.2861 | 50.2 | 231 | 1.8424E-138 |
| CN2/11681 | large subunit ribosomal protein L11                          | 0           | 8633070.80  | 0.0000 | 0.2693 | 23.6 | 157 | 8.8221E-32  |
| CN2/12035 | large subunit ribosomal protein L20                          | 0           | 1451217.90  | 0.0000 | 0.0453 | 16.1 | 118 | 0.00014532  |
| CN2/12946 | small subunit ribosomal protein S7                           | 0           | 9170494.64  | 0.0000 | 0.2860 | 56.4 | 156 | 5.9266E-62  |
| CN2/13076 | large subunit ribosomal protein L25                          | 96083.86    | 11088455.84 | 0.0088 | 0.3459 | 61.5 | 205 | 1.0862E-199 |
| CN2/14178 | small subunit ribosomal protein S1                           | 213422.52   | 8035154.22  | 0.0195 | 0.2506 | 47.1 | 560 | 0           |
| CN2/14474 | small subunit ribosomal protein S18                          | 0           | 1143944.79  | 0.0000 | 0.0357 | 31.6 | 76  | 4.7843E-07  |
| CN2/14475 | small subunit ribosomal protein S6                           | 22439.25    | 7640464.01  | 0.0021 | 0.2383 | 53.6 | 138 | 8.302E-152  |
| CN2/15993 | large subunit ribosomal protein L21                          | 0           | 1830288.47  | 0.0000 | 0.0571 | 33   | 103 | 2.6447E-10  |
| CN2/17151 | large subunit ribosomal protein L19                          | 0           | 6964790.70  | 0.0000 | 0.2172 | 45.7 | 116 | 1.0096E-35  |
| CN2/17313 | small subunit ribosomal protein S4                           | 39654.31    | 3846437.80  | 0.0036 | 0.1200 | 50.5 | 206 | 3.1511E-82  |
| CN2/17314 | small subunit ribosomal protein S11                          | 0           | 3515999.77  | 0.0000 | 0.1097 | 31   | 129 | 1.4812E-11  |
| CN2/17315 | small subunit ribosomal protein S13                          | 0           | 22642399.31 | 0.0000 | 0.7062 | 31.4 | 118 | 6.0912E-15  |
| CN2/17317 | large subunit ribosomal protein L15                          | 0           | 4712716.90  | 0.0000 | 0.1470 | 29.2 | 144 | 6.0751E-119 |
| CN2/17319 | small subunit ribosomal protein S5                           | 0           | 3614405.40  | 0.0000 | 0.1127 | 51.8 | 166 | 8.8409E-98  |
| CN2/17320 | large subunit ribosomal protein L18                          | 0           | 1144953.73  | 0.0000 | 0.0357 | 30.2 | 116 | 5.0684E-16  |
| CN2/17321 | large subunit ribosomal protein L6                           | 0           | 6772533.70  | 0.0000 | 0.2112 | 32.8 | 177 | 8.3105E-75  |
| CN2/17324 | large subunit ribosomal protein L5                           | 27161.81    | 7627744.03  | 0.0025 | 0.2379 | 33.5 | 179 | 2.3422E-20  |
| CN2/17325 | large subunit ribosomal protein L24                          | 0           | 5010192.49  | 0.0000 | 0.1563 | 56.7 | 104 | 1.1949E-14  |
| CN2/17331 | large subunit ribosomal protein L22                          | 0           | 10636016.26 | 0.0000 | 0.3317 | 41.8 | 110 | 2.4614E-51  |
| CN2/17335 | large subunit ribosomal protein L4                           | 0           | 13331872.96 | 0.0000 | 0.4158 | 58.5 | 200 | 1.4827E-37  |
| CN2/17336 | large subunit ribosomal protein L3                           | 0           | 6284208.23  | 0.0000 | 0.1960 | 41.7 | 211 | 7.8231E-36  |
| CN2/17337 | small subunit ribosomal protein S10                          | 0           | 9684142.22  | 0.0000 | 0.3021 | 35   | 103 | 8.0886E-18  |
| CN2/17860 | large subunit ribosomal protein L28                          | 0           | 8763979.96  | 0.0000 | 0.2734 | 42.3 | 78  | 1.2032E-46  |
| CN2/9219  | small subunit ribosomal protein S9                           | 0           | 3284673.86  | 0.0000 | 0.1025 | 46.2 | 130 | 3.2793E-18  |
| CN2/9220  | large subunit ribosomal protein L13                          | 0           | 5482928.44  | 0.0000 | 0.1710 | 54.9 | 142 | 3.1717E-40  |
| CN2/14472 | large subunit ribosomal protein L9                           | 0           | 7414002.56  | 0.0000 | 0.2312 | 35.1 | 148 | 1.545E-121  |
| CN2/17329 | large subunit ribosomal protein L16                          | 0           | 8639835.11  | 0.0000 | 0.2695 | 35.3 | 136 | 1.2174E-31  |
| CN2/17330 | small subunit ribosomal protein S3                           | 134478.93   | 5172753.97  | 0.0123 | 0.1613 | 25.4 | 228 | 3.8884E-19  |
| CN2/17333 | large subunit ribosomal protein L2                           | 20287.08    | 7888341.27  | 0.0019 | 0.2460 | 51.3 | 273 | 1.4121E-138 |
| CN2/15070 | small subunit ribosomal protein S2                           | 89737.71    | 3883499.76  | 0.0082 | 0.1211 | 66.4 | 241 | 7.4582E-206 |
| CN2/17281 | riboflavin synthase beta chain [EC:2.5.1.-]                  | 0           | 5019985.00  | 0.0000 | 0.1566 | 78.5 | 158 | 1.4974E-77  |
| CN2/17282 | 3,4-dihydroxy 2-butanone 4-phosphate synthase [EC:4.1.99.12] | 0           | 1635216.27  | 0.0000 | 0.0510 | 44.3 | 359 | 7.8308E-123 |
| CN2/12768 | malate dehydrogenase (quinone) [EC:1.1.5.4]                  | 264384.20   | 2091633.76  | 0.0242 | 0.0652 | 8.7  | 503 | 6.2615E-11  |
| CN2/13721 | 2-isopropylmalate synthase [EC:2.3.3.13]                     | 165198.68   | 5276712.57  | 0.0151 | 0.1646 | 36.8 | 514 | 3.384E-82   |
| CN2/17520 | pyruvate, water dikinase [EC:2.7.9.2]                        | 228297.32   | 4654085.96  | 0.0209 | 0.1452 | 30.2 | 762 | 5.6568E-181 |
| CN2/12080 | dihydroorotase [EC:3.5.2.3]                                  | 118485.35   | 1759082.15  | 0.0108 | 0.0549 | 31.2 | 423 | 2.7079E-33  |
| CN2/15718 | dihydroorotate oxidase [EC:1.3.3.1]                          | 718793.78   | 3213529.36  | 0.0657 | 0.1002 | 37.6 | 343 | 3.1619E-75  |
| CN2/17144 | dihydroorotase [EC:3.5.2.3]                                  | 0           | 944786.17   | 0.0000 | 0.0295 | 47.6 | 347 | 6.8889E-77  |

|           |                                                                      |             |             |        |        |      |      |             |
|-----------|----------------------------------------------------------------------|-------------|-------------|--------|--------|------|------|-------------|
| CN2/12359 | DNA-directed RNA polymerase subunit beta' [EC:2.7.7.6]               | 0           | 6256704.14  | 0.0000 | 0.1952 | 42.9 | 63   | 2.4264E-09  |
| CN2/12833 | phosphoribosylamine-glycine ligase [EC:6.3.4.13]                     | 0           | 3194123.80  | 0.0000 | 0.0996 | 27.9 | 430  | 1.1E-69     |
| CN2/14389 | ribonucleoside-diphosphate reductase alpha chain [EC:1.17.4.1]       | 0           | 774071.28   | 0.0000 | 0.0241 | 6.2  | 974  | 3.3978E-10  |
| CN2/14558 | adenylate kinase [EC:2.7.4.3]                                        | 107516.66   | 6593664.59  | 0.0098 | 0.2057 | 74   | 215  | 3.6315E-154 |
| CN2/16347 | 5-(carboxyamino)imidazole ribonucleotide mutase [EC:5.4.99.18]       | 0           | 1220494.05  | 0.0000 | 0.0381 | 41.4 | 162  | 1.3202E-45  |
| CN2/16348 | 5-(carboxyamino)imidazole ribonucleotide synthase [EC:6.3.4.18]      | 0           | 2927656.68  | 0.0000 | 0.0913 | 16.9 | 361  | 2.0016E-87  |
| CN2/17657 | phosphoribosylaminoimidazole-succinocarboxamide synthase             | 0           | 1642735.99  | 0.0000 | 0.0512 | 25.6 | 289  | 7.5157E-18  |
| CN2/3446  | DNA-directed RNA polymerase subunit beta' [EC:2.7.7.6]               | 19320.72    | 2125577.62  | 0.0018 | 0.0663 | 30.1 | 269  | 4.4014E-39  |
| CN2/13564 | nucleoside-diphosphate kinase [EC:2.7.4.6]                           | 30588.53    | 11877603.95 | 0.0028 | 0.3705 | 70.6 | 143  | 2.9903E-104 |
| CN2/13820 | phosphoribosylformylglycinamide synthase [EC:6.3.5.3]                | 47117.43    | 2241903.08  | 0.0043 | 0.0699 | 42.4 | 536  | 2.0107E-90  |
| CN2/12242 | phosphoribosylformylglycinamide synthase [EC:6.3.5.3]                | 216343.94   | 1837585.24  | 0.0198 | 0.0573 | 27.7 | 762  | 1.518E-100  |
| CN2/12944 | DNA-directed RNA polymerase subunit beta' [EC:2.7.7.6]               | 157900.95   | 1741393.94  | 0.0144 | 0.0543 | 36.7 | 1066 | 8.1469E-148 |
| CN2/17312 | DNA-directed RNA polymerase subunit alpha [EC:2.7.7.6]               | 329157.35   | 5730385.91  | 0.0301 | 0.1787 | 40.5 | 333  | 1.7441E-106 |
| CN2/0232  | DNA-directed RNA polymerase subunit beta [EC:2.7.7.6]                | 265228.93   | 1922771.33  | 0.0243 | 0.0600 | 50.5 | 757  | 8.4161E-245 |
| CN2/16758 | polyribonucleotide nucleotidyltransferase [EC:2.7.7.8]               | 144892.36   | 4355526.28  | 0.0132 | 0.1359 | 52.4 | 701  | 0           |
| CN2/11677 | DNA-directed RNA polymerase subunit beta [EC:2.7.7.6]                | 0           | 2013904.15  | 0.0000 | 0.0628 | 39.4 | 513  | 5.8001E-89  |
| CN1/19309 | adenylate kinase [EC:2.7.4.3]                                        | 569922.42   | 73292.30    | 0.0521 | 0.0023 | 44.2 | 215  | 1.6732E-59  |
| CN2/14003 | propionyl-CoA carboxylase beta chain [EC:6.4.1.3]                    | 0           | 843730.31   | 0.0000 | 0.0263 | 11.8 | 535  | 5.6385E-19  |
| CN2/17524 | 2-methylcitrate synthase [EC:2.3.3.5]                                | 92246.85    | 5359880.16  | 0.0084 | 0.1672 | 54.9 | 375  | 1.251E-134  |
| CN2/17525 | methylisocitrate lyase [EC:4.1.3.30]                                 | 0           | 5254574.80  | 0.0000 | 0.1639 | 33.6 | 295  | 1.7313E-86  |
| CN2/17862 | beta-alanine-pyruvate transaminase [EC:2.6.1.18]                     | 0           | 947523.04   | 0.0000 | 0.0296 | 19   | 441  | 6.3094E-13  |
| CN2/7240  | acetate kinase [EC:2.7.2.1]                                          | 0           | 1258042.75  | 0.0000 | 0.0392 | 10.9 | 395  | 1.0129E-11  |
| CN2/18205 | adenosine deaminase [EC:3.5.4.4]                                     | 174552.15   | 1082610.80  | 0.0160 | 0.0338 | 38.6 | 316  | 3.5297E-57  |
| CN2/13695 | oxygen-independent coproporphyrinogen III oxidase [EC:1.3.99.22]     | 58887.12    | 1684150.35  | 0.0054 | 0.0525 | 28.1 | 462  | 1.6405E-34  |
| CN2/16575 | glutamate-1-semialdehyde 2,1-aminomutase [EC:5.4.3.8]                | 0           | 2540807.76  | 0.0000 | 0.0792 | 15.7 | 427  | 2.8837E-45  |
| CN2/17615 | porphobilinogen synthase [EC:4.2.1.24]                               | 622482.40   | 5516858.28  | 0.0569 | 0.1721 | 37.7 | 337  | 3.6403E-88  |
| CN2/1831  | uroporphyrinogen decarboxylase [EC:4.1.1.37]                         | 0           | 2779616.71  | 0.0000 | 0.0867 | 22.6 | 354  | 1.003E-26   |
| CN2/2915  | uroporphyrin-III C-methyltransferase [EC:2.1.1.107]                  | 74464.40    | 2584162.24  | 0.0068 | 0.0806 | 24.9 | 385  | 3.22E-176   |
| CN2/2917  | hydroxymethylbilane synthase [EC:2.5.1.61]                           | 0           | 1624017.32  | 0.0000 | 0.0507 | 21.5 | 312  | 1.8083E-39  |
| CN2/5150  | nicotinate-nucleotide-dimethylbenzimidazole                          | 0           | 2449379.88  | 0.0000 | 0.0764 | 41.5 | 349  | 5.2596E-163 |
| CN2/12888 | uroporphyrin-III C-methyltransferase [EC:2.1.1.107]                  | 15551.03    | 1402961.59  | 0.0014 | 0.0438 | 61.2 | 278  | 1.0001E-167 |
| CN2/6835  | glucose-1-phosphate thymidyltransferase [EC:2.7.7.24]                | 0           | 2789117.38  | 0.0000 | 0.0870 | 16.2 | 925  | 8.2554E-93  |
| CN1/9853  | elongation factor EF-Tu [EC:3.6.5.3]                                 | 1884672.00  | 809734.38   | 0.1723 | 0.0253 | 41.3 | 298  | 3.5669E-68  |
| CN1/22569 | elongation factor EF-Tu [EC:3.6.5.3]                                 | 1715187.40  | 5260772.07  | 0.1568 | 0.1641 | 39.1 | 396  | 2.4168E-247 |
| CN1/20602 | elongation factor EF-Tu [EC:3.6.5.3]                                 | 2392303.35  | 118663.02   | 0.2187 | 0.0037 | 32.4 | 272  | 3.1502E-50  |
| CN1/20438 | elongation factor EF-Tu [EC:3.6.5.3]                                 | 1308057.27  | 4395080.42  | 0.1196 | 0.1371 | 19   | 105  | 3.9137E-07  |
| CN2/11684 | elongation factor EF-Tu [EC:3.6.5.3]                                 | 99146.20    | 51630868.31 | 0.0091 | 1.6104 | 80.1 | 397  | 0           |
| CN2/16770 | prephenate dehydratase [EC:4.2.1.51]                                 | 0           | 615817.95   | 0.0000 | 0.0192 | 16.4 | 365  | 1.2433E-20  |
| CN2/17853 | 3-phosphoshikimate 1-carboxyvinyltransferase [EC:2.5.1.19]           | 0           | 1233111.15  | 0.0000 | 0.0385 | 9.9  | 616  | 2.4779E-11  |
| CN2/17535 | 3-deoxy-7-phosphoheptulonate synthase [EC:2.5.1.54]                  | 0           | 1413615.39  | 0.0000 | 0.0441 | 33.8 | 358  | 5.8262E-51  |
| CN2/16710 | Salicylate 5-hydroxylase                                             | 25115.50    | 14120100.34 | 0.0023 | 0.4404 | 59.6 | 156  | 4.5169E-182 |
| CN2/16711 | Salicylate 5-hydroxylase                                             | 80770.62    | 7837361.01  | 0.0074 | 0.2445 | 48.6 | 418  | 4.7232E-148 |
| CN1/10034 | Naphthalene dioxygenase (alpha)                                      | 19070325.78 | 11367157.77 | 1.7436 | 0.3546 | 63.3 | 180  | 2.0697E-135 |
| CN2/11944 | Naphthalene dihydrodiol dehydrogenase                                | 142283.58   | 25349616.89 | 0.0130 | 0.7907 | 68   | 259  | 1.9574E-268 |
| CN2/11946 | Naphthalene dioxygenase (alpha)                                      | 1072816.79  | 17951113.23 | 0.0981 | 0.5599 | 74.8 | 449  | 0           |
| CN2/8666  | Naphthalene dioxygenase (alpha)                                      | 68772.39    | 3527985.67  | 0.0063 | 0.1100 | 76.9 | 65   | 1.1592E-106 |
| CN1/20819 | Salicylate 5-hydroxylase                                             | 0           | 794378.12   | 0.0000 | 0.0248 | 6.1  | 392  | 0.00029541  |
| CN2/12753 | UDP-N-acetylglucosamine--N-acetylmuramyl-(pentapeptide)              | 0           | 5747093.31  | 0.0000 | 0.1793 | 23   | 356  | 1.7921E-15  |
| CN2/17999 | D-alanyl-D-alanine carboxypeptidase (penicillin-binding protein 5/6) | 0           | 1847765.18  | 0.0000 | 0.0576 | 17.9 | 375  | 8.4586E-19  |

|           |                                                                      |            |             |        |        |      |      |             |
|-----------|----------------------------------------------------------------------|------------|-------------|--------|--------|------|------|-------------|
| CN2/13077 | ribose-phosphate pyrophosphokinase [EC:2.7.6.1]                      | 0          | 1418612.54  | 0.0000 | 0.0442 | 7.9  | 329  | 9.7449E-06  |
| CN2/4438  | phosphogluconate dehydratase [EC:4.2.1.12]                           | 1178131.57 | 3613124.62  | 0.1077 | 0.1127 | 21.8 | 609  | 6.2026E-30  |
| CN1/20692 | transaldolase [EC:2.2.1.2]                                           | 1010030.63 | 0           | 0.0923 | 0.0000 | 30.8 | 302  | 1.0991E-202 |
| CN2/4462  | beta-lactamase [EC:3.5.2.6]                                          | 110401.15  | 337227.14   | 0.0101 | 0.0105 | 16   | 288  | 3.1537E-13  |
| CN1/23302 | ketol-acid reductoisomerase [EC:1.1.1.86]                            | 1726033.97 | 70985.85    | 0.1578 | 0.0022 | 15.7 | 223  | 3.4843E-07  |
| CN2/18166 | branched-chain amino acid aminotransferase [EC:2.6.1.42]             | 45614.13   | 1864739.15  | 0.0042 | 0.0582 | 12.1 | 307  | 2.0411E-08  |
| CN1/20942 | branched-chain amino acid aminotransferase [EC:2.6.1.42]             | 1242118.39 | 0           | 0.1136 | 0.0000 | 35   | 117  | 3.9651E-85  |
| CN2/15458 | pantoate-beta-alanine ligase [EC:6.3.2.1]                            | 0          | 3183720.16  | 0.0000 | 0.0993 | 14.7 | 285  | 1.8252E-09  |
| CN2/17486 | ketol-acid reductoisomerase [EC:1.1.1.86]                            | 131634.39  | 10479385.10 | 0.0120 | 0.3269 | 57.6 | 349  | 1.1558E-221 |
| CN2/15629 | dihydroxy-acid dehydratase [EC:4.2.1.9]                              | 275367.66  | 5806439.35  | 0.0252 | 0.1811 | 32.7 | 542  | 2.1539E-121 |
| CN1/14088 | ketol-acid reductoisomerase [EC:1.1.1.86]                            | 850245.70  | 296389.67   | 0.0777 | 0.0092 | 32.4 | 71   | 2.9196E-12  |
| CN1/5217  | F-type H+-transporting ATPase subunit beta [EC:3.6.3.14]             | 2076100.68 | 186223.25   | 0.1898 | 0.0058 | 45.7 | 199  | 4.4332E-55  |
| CN1/8708  | cytochrome c oxidase subunit II [EC:1.9.3.1]                         | 1811789.29 | 0           | 0.1657 | 0.0000 | 6.8  | 294  | 0.00018547  |
| CN1/19273 | F-type H+-transporting ATPase subunit alpha [EC:3.6.3.14]            | 0          | 421878.62   | 0.0000 | 0.0132 | 16.3 | 283  | 5.2724E-20  |
| CN1/5087  | F-type H+-transporting ATPase subunit alpha [EC:3.6.3.14]            | 2228790.74 | 0           | 0.2038 | 0.0000 | 21.4 | 126  | 5.7956E-11  |
| CN1/3429  | F-type H+-transporting ATPase subunit beta [EC:3.6.3.14]             | 1796124.84 | 37136.07    | 0.1642 | 0.0012 | 38.3 | 300  | 7.061E-45   |
| CN2/0987  | cytochrome bd-I oxidase subunit I [EC:1.10.3.-]                      | 0          | 4393969.67  | 0.0000 | 0.1371 | 7.6  | 527  | 1.1155E-09  |
| CN2/14505 | inorganic pyrophosphatase [EC:3.6.1.1]                               | 0          | 1502503.02  | 0.0000 | 0.0469 | 20.6 | 175  | 1.5116E-29  |
| CN2/15264 | NADH dehydrogenase I subunit G [EC:1.6.5.3]                          | 27432.08   | 1782756.76  | 0.0025 | 0.0556 | 30.9 | 909  | 2.5564E-172 |
| CN2/16386 | F-type H+-transporting ATPase subunit delta [EC:3.6.3.14]            | 0          | 5544872.09  | 0.0000 | 0.1729 | 52.2 | 178  | 2.462E-179  |
| CN2/16387 | F-type H+-transporting ATPase subunit b [EC:3.6.3.14]                | 64391.13   | 4234284.63  | 0.0059 | 0.1321 | 41   | 156  | 2.2271E-222 |
| CN2/16411 | cb-type cytochrome c oxidase subunit III [EC:1.9.3.1]                | 0          | 2222467.19  | 0.0000 | 0.0693 | 9.7  | 1481 | 2.2922E-46  |
| CN2/17245 | F-type H+-transporting ATPase subunit beta [EC:3.6.3.14]             | 36867.65   | 7127972.20  | 0.0034 | 0.2223 | 66.2 | 160  | 3.4413E-251 |
| CN2/17246 | F-type H+-transporting ATPase subunit gamma [EC:3.6.3.14]            | 32609.47   | 1903108.97  | 0.0030 | 0.0594 | 64.9 | 288  | 3.3483E-195 |
| CN2/17247 | F-type H+-transporting ATPase subunit alpha [EC:3.6.3.14]            | 137916.57  | 4933446.68  | 0.0126 | 0.1539 | 36.9 | 225  | 2.3297E-243 |
| CN2/2277  | cytochrome c oxidase subunit II [EC:1.9.3.1]                         | 60294.95   | 2859601.16  | 0.0055 | 0.0892 | 28.1 | 310  | 2.8397E-41  |
| CN2/2465  | NADH dehydrogenase I subunit C/D [EC:1.6.5.3]                        | 0          | 749310.98   | 0.0000 | 0.0234 | 16.1 | 466  | 9.4759E-21  |
| CN2/2467  | NADH dehydrogenase I subunit F [EC:1.6.5.3]                          | 0          | 1225416.58  | 0.0000 | 0.0382 | 56.8 | 148  | 3.2676E-41  |
| CN2/9218  | ubiquinol-cytochrome c reductase iron-sulfur subunit [EC:1.10.2.2]   | 31962.23   | 0           | 0.0029 | 0.0000 | 16.8 | 197  | 8.4645E-10  |
| CN2/15095 | NADH dehydrogenase I subunit C/D [EC:1.6.5.3]                        | 0          | 0           | 0.0000 | 0.0000 | 31.8 | 88   | 0.000035901 |
| CN2/18058 | F-type H+-transporting ATPase subunit beta [EC:3.6.3.14]             | 298822.94  | 9635496.63  | 0.0273 | 0.3005 | 74.2 | 298  | 3.0008E-258 |
| CN2/9216  | ubiquinol-cytochrome c reductase cytochrome c1 subunit [EC:1.10.2.2] | 0          | 2680730.69  | 0.0000 | 0.0836 | 29   | 259  | 1.5804E-22  |
| CN2/16385 | F-type H+-transporting ATPase subunit alpha [EC:3.6.3.14]            | 144858.70  | 16336163.19 | 0.0132 | 0.5095 | 53.5 | 288  | 7.1856E-140 |
| CN1/19272 | ubiquinol-cytochrome c reductase cytochrome c1 subunit [EC:1.10.2.2] | 2029865.27 | 0           | 0.1856 | 0.0000 | 33.6 | 223  | 1.8994E-15  |
| CN1/19677 | inorganic pyrophosphatase [EC:3.6.1.1]                               | 587803.37  | 127480.07   | 0.0537 | 0.0040 | 21.6 | 185  | 1.004E-08   |
| CN1/2866  | cytochrome c oxidase subunit II [EC:1.9.3.1]                         | 746910.47  | 400112.67   | 0.0683 | 0.0125 | 19.9 | 267  | 4.2526E-10  |
| CN1/3054  | F-type H+-transporting ATPase subunit alpha [EC:3.6.3.14]            | 3040705.15 | 427818.87   | 0.2780 | 0.0133 | 41.7 | 276  | 1.0999E-39  |
| CN2/12832 | phosphoribosylaminoimidazolecarboxamide formyltransferase / IMP      | 0          | 731389.80   | 0.0000 | 0.0228 | 24.9 | 538  | 5.0017E-141 |
| CN2/16494 | nitric-oxide reductase, cytochrome c-containing subunit II           | 0          | 8000691.41  | 0.0000 | 0.2495 | 24.2 | 289  | 3.131E-54   |
| CN1/7633  | periplasmic nitrate reductase NapA [EC:1.7.99.4]                     | 830299.58  | 0           | 0.0759 | 0.0000 | 34.7 | 196  | 8.4377E-23  |
| CN2/0033  | carbonic anhydrase [EC:4.2.1.1]                                      | 0          | 3280854.85  | 0.0000 | 0.1023 | 32.7 | 214  | 1.2603E-63  |
| CN2/1030  | nitrate reductase 1, delta subunit [EC:1.7.99.4]                     | 0          | 306706.33   | 0.0000 | 0.0096 | 18.5 | 248  | 6.6929E-27  |
| CN2/13702 | nitrous-oxide reductase [EC:1.7.99.6]                                | 195631.05  | 9550605.71  | 0.0179 | 0.2979 | 49.5 | 637  | 0           |
| CN2/16257 | periplasmic nitrate reductase NapA [EC:1.7.99.4]                     | 188973.04  | 1999608.04  | 0.0173 | 0.0624 | 19.2 | 834  | 1.3016E-43  |
| CN2/15634 | nitrate reductase 1, alpha subunit [EC:1.7.99.4]                     | 365045.79  | 1751972.76  | 0.0334 | 0.0546 | 28.6 | 1251 | 4.8337E-152 |
| CN2/1029  | nitrate reductase 1, beta subunit [EC:1.7.99.4]                      | 30668.14   | 6487692.13  | 0.0028 | 0.2024 | 20.6 | 501  | 2.3055E-92  |
| CN2/13825 | quinolinate synthase [EC:2.5.1.72]                                   | 0          | 755252.26   | 0.0000 | 0.0236 | 20.9 | 278  | 5.8841E-25  |
| CN2/18256 | NAD(P) transhydrogenase [EC:1.6.1.1]                                 | 0          | 415905.35   | 0.0000 | 0.0130 | 15.5 | 464  | 1.3858E-22  |
| CN1/23998 | Hydroxybenzylidene pyruvate hydratase-aldolase                       | 631015.59  | 483001.62   | 0.0577 | 0.0151 | 50.4 | 226  | 7.14E-65    |

|           |                                                                      |            |             |        |        |      |     |             |
|-----------|----------------------------------------------------------------------|------------|-------------|--------|--------|------|-----|-------------|
| CN2/11942 | Dihydroxynaphthalene dioxygenase                                     | 1234442.15 | 23507311.92 | 0.1129 | 0.7332 | 96   | 302 | 0           |
| CN2/11940 | Hydroxybenzylidenepyruvate hydratase-aldolase                        | 241540.89  | 13599322.46 | 0.0221 | 0.4242 | 75.4 | 334 | 3.2435E-291 |
| CN1/14979 | Salicylaldehyde dehydrogenase                                        | 8155730.72 | 55435534.67 | 0.7457 | 1.7291 | 39   | 123 | 1.158E-113  |
| CN2/11943 | Salicylaldehyde dehydrogenase                                        | 2996104.28 | 31803689.65 | 0.2739 | 0.9920 | 69.4 | 483 | 0           |
| CN1/18517 | catalase/peroxidase [EC:1.11.1.6]                                    | 1010900.71 | 0           | 0.0924 | 0.0000 | 18.4 | 141 | 4.2938E-23  |
| CN2/13685 | peroxidase [EC:1.11.1.7]                                             | 14812.49   | 4660424.32  | 0.0014 | 0.1454 | 60.8 | 212 | 2.0364E-112 |
| CN2/1480  | methylenetetrahydrofolate reductase (NADPH) [EC:1.5.1.20]            | 0          | 721940.89   | 0.0000 | 0.0225 | 30   | 283 | 1.5485E-23  |
| CN1/22889 | carbon-monoxide dehydrogenase large subunit [EC:1.2.99.2]            | 222354.73  | 0           | 0.0203 | 0.0000 | 6.8  | 798 | 6.23E-11    |
| CN2/12278 | dihydrodipicolinate reductase [EC:1.3.1.26]                          | 0          | 1985943.48  | 0.0000 | 0.0619 | 22.5 | 262 | 5.3237E-69  |
| CN2/17435 | succinyl-diaminopimelate desuccinylase [EC:3.5.1.18]                 | 0          | 810478.74   | 0.0000 | 0.0253 | 13.2 | 393 | 5.0894E-06  |
| CN2/17659 | dihydrodipicolinate synthase [EC:4.2.1.52]                           | 0          | 5630905.15  | 0.0000 | 0.1756 | 38.7 | 292 | 3.3187E-199 |
| CN2/5124  | 2,3,4,5-tetrahydropyridine-2-carboxylate N-succinyltransferase       | 0          | 3641882.51  | 0.0000 | 0.1136 | 28.2 | 344 | 9.9913E-178 |
| CN2/17458 | UDP-N-acetylmuramoylalanyl-D-glutamyl-2,6-diaminopimelate--D-alanyl- | 800507.53  | 2628485.85  | 0.0732 | 0.0820 | 57.5 | 457 | 8.6266E-113 |
| CN2/17459 | UDP-N-acetylmuramoylalanyl-D-glutamate--2,6-diaminopimelate ligase   | 265345.73  | 2373952.90  | 0.0243 | 0.0740 | 35.4 | 486 | 2.048E-66   |
| CN1/23338 | dihydrodipicolinate synthase [EC:4.2.1.52]                           | 3462026.11 | 32381.51    | 0.3165 | 0.0010 | 14.8 | 291 | 5.3634E-12  |
| CN2/0815  | 2-dehydro-3-deoxyphosphoconate aldolase (KDO 8-P synthase)           | 44918.26   | 3929553.07  | 0.0041 | 0.1226 | 38.4 | 281 | 5.9795E-76  |
| CN2/17728 | starch phosphorylase [EC:2.4.1.1]                                    | 219693.06  | 1013998.05  | 0.0201 | 0.0316 | 17.7 | 817 | 8.1252E-62  |
| CN2/0958  | methylmalonate-semialdehyde dehydrogenase [EC:1.2.1.27]              | 212526.15  | 4489251.66  | 0.0194 | 0.1400 | 29.9 | 492 | 3.2189E-53  |
| CN1/2863  | methylmalonate-semialdehyde dehydrogenase [EC:1.2.1.27]              | 1701459.21 | 112143.00   | 0.1556 | 0.0035 | 42.5 | 355 | 1.8181E-30  |
| CN1/3000  | superoxide dismutase, Fe-Mn family [EC:1.15.1.1]                     | 5531969.88 | 767791.03   | 0.5058 | 0.0239 | 30.7 | 163 | 2.5954E-301 |
| CN2/0460  | superoxide dismutase, Fe-Mn family [EC:1.15.1.1]                     | 110037.02  | 35468312.70 | 0.0101 | 1.1063 | 49.2 | 193 | 5.2745E-59  |
| CN2/16234 | cyclase HisF [EC:4.1.3.-]                                            | 0          | 1288439.23  | 0.0000 | 0.0402 | 24.9 | 265 | 1.468E-23   |
| CN2/18232 | phosphoribosylformimino-5-aminoimidazole carboxamide ribotide        | 0          | 1668698.56  | 0.0000 | 0.0520 | 24   | 100 | 2.09E-08    |
| CN2/4324  | histidinol-phosphate aminotransferase [EC:2.6.1.9]                   | 0          | 845639.29   | 0.0000 | 0.0264 | 8.8  | 354 | 0.00090427  |
| CN2/4325  | histidinol dehydrogenase [EC:1.1.1.23]                               | 165841.00  | 1415793.46  | 0.0152 | 0.0442 | 27.8 | 435 | 6.402E-30   |
| CN1/22034 | histidinol dehydrogenase [EC:1.1.1.23]                               | 587232.72  | 198057.19   | 0.0537 | 0.0062 | 21.9 | 434 | 2.1855E-60  |
| CN1/16907 | malate synthase [EC:2.3.3.9]                                         | 724969.91  | 25723.40    | 0.0663 | 0.0008 | 17.6 | 205 | 2.396E-12   |
| CN1/19397 | formate dehydrogenase, alpha subunit [EC:1.2.1.2]                    | 236993.69  | 0           | 0.0217 | 0.0000 | 12.8 | 484 | 2.6944E-21  |
| CN1/4315  | malate synthase [EC:2.3.3.9]                                         | 591668.00  | 8057.51     | 0.0541 | 0.0003 | 21.5 | 540 | 5.9799E-188 |
| CN2/12290 | glycolate oxidase [EC:1.1.3.15]                                      | 0          | 1498060.54  | 0.0000 | 0.0467 | 7.7  | 300 | 1.4352E-06  |
| CN2/14920 | isocitrate lyase [EC:4.1.3.1]                                        | 21322.94   | 3114796.31  | 0.0019 | 0.0972 | 51.3 | 226 | 3.101E-122  |
| CN2/16997 | methylenetetrahydrofolate dehydrogenase (NADP+) /                    | 0          | 1938005.74  | 0.0000 | 0.0604 | 15.8 | 284 | 6.601E-48   |
| CN2/12329 | malate synthase [EC:2.3.3.9]                                         | 30976.28   | 1047643.15  | 0.0028 | 0.0327 | 26.7 | 727 | 1.1904E-167 |
| CN2/14951 | isocitrate lyase [EC:4.1.3.1]                                        | 0          | 8459447.62  | 0.0000 | 0.2639 | 42.4 | 304 | 3.5833E-114 |
| CN2/15317 | malate synthase [EC:2.3.3.9]                                         | 88694.10   | 3573543.31  | 0.0081 | 0.1115 | 51.8 | 726 | 0           |
| CN1/25584 | acetyl-CoA synthetase [EC:6.2.1.1]                                   | 318221.02  | 15247812.11 | 0.0291 | 0.4756 | 15.3 | 176 | 4.0646E-28  |
| CN2/11887 | glyceraldehyde 3-phosphate dehydrogenase [EC:1.2.1.12]               | 224695.43  | 2316612.19  | 0.0205 | 0.0723 | 37.5 | 483 | 4.698E-164  |
| CN2/14229 | glyceraldehyde 3-phosphate dehydrogenase [EC:1.2.1.12]               | 0          | 3300209.78  | 0.0000 | 0.1029 | 15   | 320 | 1.8951E-09  |
| CN2/16227 | phosphoglycerate mutase [EC:5.4.2.1]                                 | 99214.77   | 935788.96   | 0.0091 | 0.0292 | 30.6 | 516 | 3.007E-111  |
| CN2/2100  | acetyl-CoA synthetase [EC:6.2.1.1]                                   | 0          | 7279863.58  | 0.0000 | 0.2271 | 15.4 | 651 | 9.4808E-55  |
| CN2/0814  | enolase [EC:4.2.1.11]                                                | 33831.96   | 5451376.01  | 0.0031 | 0.1700 | 48.3 | 429 | 0           |
| CN1/3997  | acetyl-CoA synthetase [EC:6.2.1.1]                                   | 5529707.07 | 288775.10   | 0.5056 | 0.0090 | 24.8 | 270 | 1.4373E-142 |
| CN1/4744  | acetyl-CoA synthetase [EC:6.2.1.1]                                   | 3203367.39 | 127810.61   | 0.2929 | 0.0040 | 51   | 210 | 4.5835E-41  |
| CN1/19801 | glyceraldehyde 3-phosphate dehydrogenase [EC:1.2.1.12]               | 7575395.36 | 796136.00   | 0.6926 | 0.0248 | 39.1 | 335 | 3.6604E-59  |
| CN1/19928 | acetyl-CoA synthetase [EC:6.2.1.1]                                   | 5575471.11 | 57023.22    | 0.5098 | 0.0018 | 28.8 | 66  | 1.6917E-09  |
| CN1/6997  | glyceraldehyde 3-phosphate dehydrogenase [EC:1.2.1.12]               | 85192.90   | 0           | 0.0078 | 0.0000 | 13   | 307 | 0.000020785 |
| CN2/3095  | aminomethyltransferase [EC:2.1.2.10]                                 | 0          | 2638268.62  | 0.0000 | 0.0823 | 37.7 | 371 | 4.8005E-163 |
| CN2/14159 | D-3-phosphoglycerate dehydrogenase [EC:1.1.1.95]                     | 74151.73   | 11683297.10 | 0.0068 | 0.3644 | 53   | 411 | 2.955E-134  |
| CN2/16771 | phosphoserine aminotransferase [EC:2.6.1.52]                         | 300694.16  | 901725.47   | 0.0275 | 0.0281 | 31.6 | 361 | 5.6174E-29  |



|           |                                                                 |            |             |        |        |      |      |             |
|-----------|-----------------------------------------------------------------|------------|-------------|--------|--------|------|------|-------------|
| CN2/17146 | threonine synthase [EC:4.2.3.1]                                 | 49003.53   | 3140973.85  | 0.0045 | 0.0980 | 51.1 | 474  | 7.3908E-126 |
| CN2/2297  | tryptophan synthase alpha chain [EC:4.2.1.20]                   | 0          | 960762.46   | 0.0000 | 0.0300 | 42.9 | 273  | 3.7466E-125 |
| CN2/3091  | glycine dehydrogenase [EC:1.4.4.2]                              | 539960.21  | 3136941.16  | 0.0494 | 0.0978 | 24.5 | 952  | 2.6088E-81  |
| CN1/6765  | aminomethyltransferase [EC:2.1.2.10]                            | 701360.19  | 0           | 0.0641 | 0.0000 | 17.9 | 179  | 7.7675E-07  |
| CN1/7239  | aminomethyltransferase [EC:2.1.2.10]                            | 802481.21  | 0           | 0.0734 | 0.0000 | 16.5 | 133  | 1.9588E-07  |
| CN2/16776 | aminopeptidase N [EC:3.4.11.2]                                  | 136261.36  | 1475133.35  | 0.0125 | 0.0460 | 16.9 | 886  | 2.8141E-40  |
| CN1/12719 | glutamate--cysteine ligase [EC:6.3.2.2]                         | 1423926.97 | 0           | 0.1302 | 0.0000 | 17.8 | 236  | 5.1907E-24  |
| CN1/3766  | mannitol 2-dehydrogenase [EC:1.1.1.67]                          | 561995.01  | 0           | 0.0514 | 0.0000 | 4.1  | 466  | 0.0018069   |
| CN2/17013 | acyl-CoA dehydrogenase [EC:1.3.99.-]                            | 69315.30   | 5054304.10  | 0.0063 | 0.1576 | 31.5 | 815  | 3.6795E-190 |
| CN2/11654 | enoyl-[acyl-carrier protein] reductase I [EC:1.3.1.9]           | 1398778.22 | 5209627.58  | 0.1279 | 0.1625 | 39.8 | 264  | 1.0493E-129 |
| CN2/17447 | 3-oxoacyl-[acyl-carrier-protein] synthase I [EC:2.3.1.41]       | 0          | 3709211.30  | 0.0000 | 0.1157 | 42   | 405  | 1.0749E-118 |
| CN2/17503 | acetyl-CoA carboxylase biotin carboxyl carrier protein          | 0          | 5954655.35  | 0.0000 | 0.1857 | 35.8 | 151  | 8.1056E-21  |
| CN2/5127  | 3-oxoacyl-[acyl-carrier-protein] synthase III [EC:2.3.1.180]    | 0          | 1718176.40  | 0.0000 | 0.0536 | 30.8 | 373  | 2.6135E-84  |
| CN2/5241  | [acyl-carrier-protein] S-malonyltransferase [EC:2.3.1.39]       | 90799.70   | 3866203.90  | 0.0083 | 0.1206 | 25.3 | 312  | 1.2918E-90  |
| CN2/0818  | acetyl-CoA carboxylase carboxyl transferase subunit alpha       | 0          | 1811062.20  | 0.0000 | 0.0565 | 36.4 | 316  | 7.4442E-61  |
| CN2/17504 | acetyl-CoA carboxylase, biotin carboxylase subunit [EC:6.4.1.2] | 299692.27  | 9060534.60  | 0.0274 | 0.2826 | 27.4 | 449  | 6.7482E-57  |
| CN1/25901 | dihydropyrimidinase [EC:3.5.2.2]                                | 831763.98  | 0           | 0.0760 | 0.0000 | 25.1 | 167  | 7.9071E-08  |
| CN2/14326 | IMP dehydrogenase [EC:1.1.1.205]                                | 293196.19  | 6440649.35  | 0.0268 | 0.2009 | 72   | 489  | 0           |
| CN2/14327 | GMP synthase (glutamine-hydrolysing) [EC:6.3.5.2]               | 0          | 2217723.59  | 0.0000 | 0.0692 | 34.2 | 526  | 3.1611E-111 |
| CN1/16766 | glutathione S-transferase [EC:2.5.1.18]                         | 1308399.49 | 101123.69   | 0.1196 | 0.0032 | 36.3 | 157  | 6.7309E-37  |
| CN1/24000 | Glutathione S transferase (NagJ-like)                           | 2203721.06 | 3557166.62  | 0.2015 | 0.1110 | 30.3 | 201  | 1.0159E-30  |
| CN2/17347 | Glutathione S transferase (NagJ-like)                           | 52937.20   | 11297726.33 | 0.0048 | 0.3524 | 48.8 | 205  | 2.0009E-61  |
| CN2/13275 | Glutathione S transferase (NagJ-like)                           | 0          | 1958371.59  | 0.0000 | 0.0611 | 16   | 225  | 0.00013461  |
| CN2/1343  | Glutathione S transferase (NagJ-like)                           | 0          | 2953568.82  | 0.0000 | 0.0921 | 31.7 | 312  | 6.1375E-93  |
| CN2/1590  | Glutathione S transferase (NagJ-like)                           | 0          | 2397152.76  | 0.0000 | 0.0748 | 17.3 | 225  | 2.9753E-07  |
| CN2/16380 | DNA polymerase III subunit beta [EC:2.7.7.7]                    | 322468.33  | 5276987.18  | 0.0295 | 0.1646 | 26.4 | 367  | 1.1874E-20  |
| CN2/17307 | single-strand DNA-binding protein                               | 0          | 6237766.48  | 0.0000 | 0.1946 | 29.3 | 164  | 1.5984E-10  |
| CN1/3021  | DNA polymerase III subunit beta [EC:2.7.7.7]                    | 3897433.08 | 77593.52    | 0.3563 | 0.0024 | 45.2 | 270  | 6.0605E-66  |
| CN2/12752 | UDP-N-acetylmuramate--alanine ligase [EC:6.3.2.8]               | 0          | 2735569.60  | 0.0000 | 0.0853 | 5.6  | 486  | 1.7743E-13  |
| CN2/12755 | UDP-N-acetylmuramoylalanine--D-glutamate ligase [EC:6.3.2.9]    | 79657.48   | 1731342.77  | 0.0073 | 0.0540 | 33.6 | 447  | 4.7176E-75  |
| CN2/12751 | D-alanine-D-alanine ligase [EC:6.3.2.4]                         | 0          | 2667039.39  | 0.0000 | 0.0832 | 22.3 | 314  | 2.7915E-65  |
| CN1/8111  | adenosylhomocysteinase [EC:3.3.1.1]                             | 1593520.12 | 127924.27   | 0.1457 | 0.0040 | 5.9  | 353  | 0.00023466  |
| CN1/10612 | cysteine synthase A [EC:2.5.1.47]                               | 4936466.17 | 89020.34    | 0.4513 | 0.0028 | 55.9 | 177  | 2.845E-97   |
| CN2/0870  | aspartate-semialdehyde dehydrogenase [EC:1.2.1.11]              | 0          | 1446018.98  | 0.0000 | 0.0451 | 53.2 | 370  | 6.9606E-209 |
| CN2/0883  | O-succinylhomoserine sulfhydrylase [EC:2.5.1.-]                 | 0          | 2122617.57  | 0.0000 | 0.0662 | 14.6 | 403  | 9.969E-19   |
| CN2/13271 | cysteine synthase A [EC:2.5.1.47]                               | 0          | 4502590.91  | 0.0000 | 0.1404 | 62.3 | 324  | 3.2661E-170 |
| CN2/1337  | 5-methyltetrahydropteroyltriglutamate--homocysteine             | 0          | 2966420.32  | 0.0000 | 0.0925 | 18.3 | 778  | 4.2895E-75  |
| CN2/14137 | 5-methyltetrahydrofolate--homocysteine methyltransferase        | 0          | 1559036.08  | 0.0000 | 0.0486 | 11   | 1080 | 2.9247E-43  |
| CN2/1481  | adenosylhomocysteinase [EC:3.3.1.1]                             | 1665862.65 | 4940854.48  | 0.1523 | 0.1541 | 29.4 | 473  | 3.3927E-84  |
| CN2/16284 | aspartate kinase [EC:2.7.2.4]                                   | 0          | 1386296.42  | 0.0000 | 0.0432 | 9.5  | 412  | 5.2011E-83  |
| CN2/0915  | 5-methyltetrahydrofolate--homocysteine methyltransferase        | 0          | 948392.95   | 0.0000 | 0.0296 | 29.7 | 101  | 5.2187E-06  |
| CN2/11771 | aromatic-amino-acid transaminase [EC:2.6.1.57]                  | 52882.41   | 5187958.14  | 0.0048 | 0.1618 | 38.7 | 390  | 8.0017E-84  |
| CN2/12482 | cysteine synthase B [EC:2.5.1.47]                               | 5943575.01 | 0           | 0.5434 | 0.0000 | 8.7  | 300  | 0.00007926  |
| CN2/13259 | serine O-acetyltransferase [EC:2.3.1.30]                        | 0          | 2915187.86  | 0.0000 | 0.0909 | 30.9 | 259  | 8.6319E-19  |
| CN2/1490  | S-adenosylmethionine synthetase [EC:2.5.1.6]                    | 222563.50  | 2785557.81  | 0.0203 | 0.0869 | 25   | 396  | 8.6772E-51  |
| CN2/1839  | O-acetylhomoserine (thiol)-lyase [EC:2.5.1.49]                  | 138744.27  | 7111508.50  | 0.0127 | 0.2218 | 41.2 | 425  | 2.6841E-57  |
| CN1/1790  | O-acetylhomoserine (thiol)-lyase [EC:2.5.1.49]                  | 1556036.55 | 38034.47    | 0.1423 | 0.0012 | 54.8 | 343  | 1.5274E-136 |
| CN1/18701 | adenosylhomocysteinase [EC:3.3.1.1]                             | 904409.96  | 0           | 0.0827 | 0.0000 | 21.6 | 153  | 2.4545E-06  |
| CN1/21714 | S-adenosylmethionine synthetase [EC:2.5.1.6]                    | 1961374.06 | 0           | 0.1793 | 0.0000 | 17.4 | 282  | 6.2901E-28  |

|           |                                                             |             |             |        |        |      |     |             |
|-----------|-------------------------------------------------------------|-------------|-------------|--------|--------|------|-----|-------------|
| CN1/7796  | cysteine synthase A [EC:2.5.1.47]                           | 3264495.11  | 182339.24   | 0.2985 | 0.0057 | 39.2 | 319 | 1.8588E-69  |
| CN1/11469 | S-adenosylmethionine synthetase [EC:2.5.1.6]                | 1649069.64  | 0           | 0.1508 | 0.0000 | 20   | 105 | 0.000003604 |
| CN2/0654  | glycine hydroxymethyltransferase [EC:2.1.2.1]               | 72003.03    | 875772.55   | 0.0066 | 0.2732 | 46.8 | 417 | 7.0514E-267 |
| CN2/10886 | beta-glucosidase [EC:3.2.1.21]                              | 0           | 1693327.78  | 0.0000 | 0.0528 | 2.8  | 757 | 0.000059933 |
| CN2/3093  | glycine hydroxymethyltransferase [EC:2.1.2.1]               | 8615.14     | 2434353.03  | 0.0008 | 0.0759 | 23.7 | 417 | 5.7618E-25  |
| CN1/11923 | glycine hydroxymethyltransferase [EC:2.1.2.1]               | 452884.24   | 0           | 0.0414 | 0.0000 | 16.1 | 217 | 6.7212E-08  |
| CN2/14904 | aconitate hydratase 1 [EC:4.2.1.3]                          | 0           | 1413641.61  | 0.0000 | 0.0441 | 12.3 | 454 | 1.4094E-13  |
| CN1/19403 | dihydrolipoamide dehydrogenase [EC:1.8.1.4]                 | 1092848.02  | 130356.37   | 0.0999 | 0.0041 | 48.5 | 66  | 2.4542E-10  |
| CN1/13053 | isocitrate dehydrogenase [EC:1.1.1.42]                      | 4093605.83  | 221650.98   | 0.3743 | 0.0069 | 38.7 | 155 | 1.1925E-67  |
| CN1/21366 | dihydrolipoamide dehydrogenase [EC:1.8.1.4]                 | 494438.98   | 0           | 0.0452 | 0.0000 | 17.1 | 216 | 8.1783E-06  |
| CN1/13051 | isocitrate dehydrogenase [EC:1.1.1.42]                      | 2611354.97  | 1237163.72  | 0.2388 | 0.0386 | 37.2 | 282 | 1.26E-25    |
| CN1/1802  | dihydrolipoamide dehydrogenase [EC:1.8.1.4]                 | 1834810.91  | 30027.69    | 0.1678 | 0.0009 | 20.3 | 399 | 9.4131E-18  |
| CN2/0972  | 2-oxoglutarate dehydrogenase E1 component [EC:1.2.4.2]      | 161062.75   | 8884504.43  | 0.0147 | 0.2771 | 45.1 | 943 | 0           |
| CN2/17404 | aconitate hydratase 1 [EC:4.2.1.3]                          | 72510.31    | 3040951.62  | 0.0066 | 0.0948 | 29.8 | 312 | 2.693E-96   |
| CN2/17513 | aconitate hydratase 2 [EC:4.2.1.3]                          | 10624717.02 | 18010515.82 | 0.9714 | 0.5618 | 46.4 | 323 | 2.7298E-135 |
| CN2/17817 | fumarate hydratase, class II [EC:4.2.1.2]                   | 0           | 14943375.10 | 0.0000 | 0.4661 | 66   | 150 | 8.7237E-33  |
| CN2/2192  | aconitate hydratase 1 [EC:4.2.1.3]                          | 53126.73    | 5281130.74  | 0.0049 | 0.1647 | 48.1 | 351 | 4.1008E-264 |
| CN2/7221  | fumarate hydratase, class I [EC:4.2.1.2]                    | 93689.27    | 1980595.42  | 0.0086 | 0.0618 | 34.3 | 507 | 1.4495E-127 |
| CN2/0970  | dihydrolipoamide dehydrogenase [EC:1.8.1.4]                 | 148043.82   | 9362640.85  | 0.0135 | 0.2920 | 61.7 | 478 | 8.9434E-280 |
| CN2/0971  | 2-oxoglutarate dehydrogenase E2 component (dihydrolipoamide | 67457.66    | 18048128.27 | 0.0062 | 0.5629 | 64.6 | 404 | 0           |
| CN2/0977  | citrate synthase [EC:2.3.3.1]                               | 105537.65   | 11735594.84 | 0.0096 | 0.3660 | 44.7 | 423 | 1.0127E-185 |
| CN2/10478 | pyruvate dehydrogenase E2 component (dihydrolipoamide       | 346944.68   | 19113646.79 | 0.0317 | 0.5962 | 42.2 | 552 | 0           |
| CN2/16406 | aconitate hydratase 1 [EC:4.2.1.3]                          | 10394.38    | 3315984.69  | 0.0010 | 0.1034 | 74.3 | 226 | 8.3163E-173 |
| CN2/17007 | aconitate hydratase 2 [EC:4.2.1.3]                          | 117847.15   | 6844721.39  | 0.0108 | 0.2135 | 70.2 | 262 | 1.3876E-233 |
| CN2/17464 | fumarate hydratase, class II [EC:4.2.1.2]                   | 0           | 4455059.26  | 0.0000 | 0.1390 | 32   | 153 | 1.7191E-19  |
| CN2/14871 | pyruvate carboxylase subunit B [EC:6.4.1.1]                 | 172892.01   | 1281210.62  | 0.0158 | 0.0400 | 40.1 | 272 | 1.9055E-57  |
| CN2/14929 | isocitrate dehydrogenase [EC:1.1.1.42]                      | 49113.12    | 4821914.35  | 0.0045 | 0.1504 | 37.7 | 741 | 3.2818E-230 |
| CN2/14930 | isocitrate dehydrogenase [EC:1.1.1.42]                      | 28826.30    | 1789463.05  | 0.0026 | 0.0558 | 23   | 418 | 4.0557E-30  |
| CN2/17523 | aconitate hydratase 1 [EC:4.2.1.3]                          | 618471.07   | 3290253.41  | 0.0565 | 0.1026 | 47.5 | 869 | 1.019E-207  |
| CN2/16590 | aconitate hydratase 2 [EC:4.2.1.3]                          | 101179.79   | 8380180.91  | 0.0093 | 0.2614 | 44.9 | 256 | 5.6258E-68  |
| CN1/0968  | aconitate hydratase 1 [EC:4.2.1.3]                          | 705712.94   | 63467.53    | 0.0645 | 0.0020 | 21.8 | 229 | 8.4027E-24  |
| CN1/13809 | fumarate hydratase, class II [EC:4.2.1.2]                   | 1095279.05  | 0           | 0.1001 | 0.0000 | 11.3 | 335 | 2.3334E-14  |
| CN1/18275 | aconitate hydratase 1 [EC:4.2.1.3]                          | 3773649.29  | 206403.13   | 0.3450 | 0.0064 | 22.3 | 461 | 7.3453E-76  |
| CN1/13955 | aconitate hydratase 1 [EC:4.2.1.3]                          | 2636314.40  | 333221.49   | 0.2410 | 0.0104 | 59.7 | 149 | 2.5704E-14  |
| CN1/25093 | malate dehydrogenase [EC:1.1.1.37]                          | 3776862.43  | 189581.76   | 0.3453 | 0.0059 | 53.5 | 71  | 2.2497E-46  |
| CN1/18959 | fructose-bisphosphate aldolase, class II [EC:4.1.2.13]      | 0           | 0           | 0.0000 | 0.0000 | 14.9 | 175 | 1.2422E-06  |
| CN1/21183 | malate dehydrogenase [EC:1.1.1.37]                          | 3143848.62  | 1579234.03  | 0.2874 | 0.0493 | 27.8 | 108 | 3.8974E-21  |
| CN1/24031 | malate dehydrogenase [EC:1.1.1.37]                          | 14386933.41 | 105677.96   | 1.3154 | 0.0033 | 32.5 | 154 | 1.0219E-44  |
| CN2/12319 | ribose 5-phosphate isomerase A [EC:5.3.1.6]                 | 0           | 0           | 0.0000 | 0.0000 | 30.9 | 223 | 1.2577E-78  |
| CN2/14560 | phosphoenolpyruvate carboxylase [EC:4.1.1.31]               | 720921.10   | 1413507.46  | 0.0659 | 0.0441 | 21.6 | 878 | 1.5226E-71  |
| CN2/17711 | phosphoenolpyruvate carboxykinase (ATP) [EC:4.1.1.49]       | 198600.71   | 2141019.08  | 0.0182 | 0.0668 | 48.1 | 514 | 4.4167E-303 |
| CN2/17729 | fructose-1,6-bisphosphatase I [EC:3.1.3.11]                 | 0           | 690976.80   | 0.0000 | 0.0216 | 16.7 | 336 | 8.1952E-16  |
| CN2/18112 | phosphoglycerate kinase [EC:2.7.2.3]                        | 0           | 7387651.30  | 0.0000 | 0.2304 | 36.2 | 387 | 5.8044E-112 |
| CN2/18115 | fructose-bisphosphate aldolase, class II [EC:4.1.2.13]      | 423646.38   | 7390508.22  | 0.0387 | 0.2305 | 51.4 | 354 | 3.3727E-162 |
| CN2/17627 | malate dehydrogenase (oxaloacetate-decarboxylating)(NADP+)  | 32020.44    | 9240644.95  | 0.0029 | 0.2882 | 64   | 422 | 3.4936E-271 |
| CN2/7218  | pyruvate kinase [EC:2.7.1.40]                               | 0           | 4522699.71  | 0.0000 | 0.1411 | 51.7 | 484 | 4.2745E-231 |
| CN1/12831 | triosephosphate isomerase (TIM) [EC:5.3.1.1]                | 283524.07   | 0           | 0.0259 | 0.0000 | 6.6  | 211 | 2.7903E-07  |
| CN1/14462 | malate dehydrogenase (oxaloacetate-decarboxylating)(NADP+)  | 1712860.53  | 122943.90   | 0.1566 | 0.0038 | 38.4 | 770 | 3.5893E-196 |
| CN1/24033 | malate dehydrogenase [EC:1.1.1.37]                          | 3078558.71  | 0           | 0.2815 | 0.0000 | 58.8 | 136 | 4.9693E-66  |

|           |                                                                 |             |             |        |        |      |     |             |
|-----------|-----------------------------------------------------------------|-------------|-------------|--------|--------|------|-----|-------------|
| CN2/13553 | alcohol dehydrogenase (NADP+) [EC:1.1.1.2]                      | 0           | 4613253.35  | 0.0000 | 0.1439 | 27.2 | 323 | 3.5023E-24  |
| CN1/25264 | succinyl-CoA synthetase beta subunit [EC:6.2.1.5]               | 3494198.79  | 0           | 0.3195 | 0.0000 | 51.2 | 43  | 2.0881E-07  |
| CN1/21663 | succinyl-CoA synthetase beta subunit [EC:6.2.1.5]               | 6118193.98  | 142890.80   | 0.5594 | 0.0045 | 22.3 | 319 | 4.999E-33   |
| CN2/0868  | 3-isopropylmalate/(R)-2-methylmalate dehydratase small subunit  | 0           | 2191259.32  | 0.0000 | 0.0683 | 29.3 | 215 | 4.0804E-15  |
| CN2/0968  | succinyl-CoA synthetase alpha subunit [EC:6.2.1.5]              | 161248.55   | 13803927.93 | 0.0147 | 0.4306 | 40   | 295 | 5.4795E-80  |
| CN2/0969  | succinyl-CoA synthetase beta subunit [EC:6.2.1.5]               | 207786.98   | 7227720.60  | 0.0190 | 0.2254 | 59.5 | 388 | 2.4083E-291 |
| CN2/10479 | pyruvate dehydrogenase E1 component [EC:1.2.4.1]                | 88378.33    | 5337308.23  | 0.0081 | 0.1665 | 35.9 | 896 | 1.2555E-280 |
| CN1/3474  | 3-hydroxybutyrate dehydrogenase [EC:1.1.1.30]                   | 707168.69   | 0           | 0.0647 | 0.0000 | 14.9 | 168 | 0.000048379 |
| CN2/13999 | 3-oxoacid CoA-transferase subunit A [EC:2.8.3.5]                | 0           | 1402092.25  | 0.0000 | 0.0437 | 13.9 | 231 | 1.4079E-06  |
| CN2/17488 | acetolactate synthase I/II/III large subunit [EC:2.2.1.6]       | 0           | 535346.44   | 0.0000 | 0.0167 | 11.1 | 577 | 2.7468E-21  |
| CN2/17368 | Acetaldehyde dehydrogenase                                      | 89738.28    | 9410098.11  | 0.0082 | 0.2935 | 59   | 307 | 1.2421E-169 |
| CN1/4225  | formate C-acetyltransferase [EC:2.3.1.54]                       | 255681.09   | 0           | 0.0234 | 0.0000 | 15.8 | 461 | 1.2572E-08  |
| CN1/6621  | acetoacetyl-CoA reductase [EC:1.1.1.36]                         | 8386309.35  | 534880.24   | 0.7668 | 0.0167 | 49.2 | 240 | 4.8195E-181 |
| CN1/7282  | pyruvate dehydrogenase E1 component subunit alpha [EC:1.2.4.1]  | 0           | 80271.83    | 0.0000 | 0.0025 | 7.2  | 277 | 5.3259E-07  |
| CN2/1650  | aryl-alcohol dehydrogenase [EC:1.1.1.90]                        | 3098233.53  | 0           | 0.2833 | 0.0000 | 7.1  | 184 | 2.3868E-11  |
| CN1/14978 | Dihydroxynaphthalene dioxygenase                                | 23338452.23 | 15439374.45 | 2.1339 | 0.4816 | 65.7 | 134 | 2.9911E-263 |
| CN2/8417  | Dihydroxynaphthalene dioxygenase                                | 6074888.68  | 3612052.85  | 0.5554 | 0.1127 | 58.1 | 155 | 1.4899E-112 |
| CN2/3403  | Unknown function                                                | 31453.38    | 1519951.94  | 0.0029 | 0.0474 | 55.1 | 227 | 5.0311E-50  |
| CN2/12416 | 3-hydroxyacyl-CoA dehydrogenase / enoyl-CoA hydratase /         | 279698.22   | 4048051.36  | 0.0256 | 0.1263 | 20.6 | 204 | 1.4674E-24  |
| CN2/15643 | acyl-CoA thioesterase II [EC:3.1.2.-]                           | 0           | 671545.78   | 0.0000 | 0.0209 | 38   | 255 | 5.6471E-31  |
| CN2/15982 | 3-hydroxyacyl-CoA dehydrogenase / enoyl-CoA hydratase /         | 31257.82    | 3044033.65  | 0.0029 | 0.0949 | 36.9 | 244 | 4.1192E-111 |
| CN2/5240  | 3-oxoacyl-[acyl-carrier protein] reductase [EC:1.1.1.100]       | 0           | 6429008.48  | 0.0000 | 0.2005 | 36.3 | 248 | 7.7308E-127 |
| CN2/14184 | isochorismatase [EC:3.3.2.1]                                    | 0           | 9261490.92  | 0.0000 | 0.2889 | 17.7 | 198 | 2.1001E-33  |
| CN2/1495  | transketolase [EC:2.2.1.1]                                      | 71750.83    | 2193592.63  | 0.0066 | 0.0684 | 26.9 | 665 | 4.2729E-57  |
| CN2/8952  | 2-Oxopent-4-enoate hydratase                                    | 0           | 3096663.18  | 0.0000 | 0.0966 | 17.6 | 159 | 7.1903E-14  |
| CN2/12417 | acetyl-CoA acyltransferase [EC:2.3.1.16]                        | 0           | 4883582.81  | 0.0000 | 0.1523 | 28.9 | 391 | 1.2339E-109 |
| CN2/17598 | 3-oxoadipate enol-lactonase [EC:3.1.1.24]                       | 0           | 1424591.65  | 0.0000 | 0.0444 | 8.3  | 264 | 1.576E-10   |
| CN1/4142  | enoyl-CoA hydratase [EC:4.2.1.17]                               | 3265155.38  | 32780.13    | 0.2985 | 0.0010 | 57.1 | 126 | 5.0842E-20  |
| CN2/0959  | enoyl-CoA hydratase [EC:4.2.1.17]                               | 0           | 1551348.53  | 0.0000 | 0.0484 | 26.5 | 257 | 4.5243E-36  |
| CN2/0973  | succinate dehydrogenase iron-sulfur protein [EC:1.3.99.1]       | 109456.85   | 20327885.92 | 0.0100 | 0.6340 | 61.5 | 234 | 6.0427E-54  |
| CN2/0975  | succinate dehydrogenase hydrophobic membrane anchor protein     | 0           | 438761.94   | 0.0000 | 0.0137 | 15.6 | 122 | 0.00023688  |
| CN2/11642 | enoyl-CoA hydratase [EC:4.2.1.17]                               | 614185.66   | 1455472.80  | 0.0562 | 0.0454 | 13   | 285 | 8.5222E-121 |
| CN2/13997 | acetyl-CoA C-acetyltransferase [EC:2.3.1.9]                     | 0           | 4136944.38  | 0.0000 | 0.1290 | 18.5 | 406 | 3.1757E-30  |
| CN2/17132 | enoyl-CoA hydratase [EC:4.2.1.17]                               | 0           | 1898609.72  | 0.0000 | 0.0592 | 12.4 | 282 | 3.1936E-08  |
| CN2/0974  | succinate dehydrogenase flavoprotein subunit [EC:1.3.99.1]      | 79282.28    | 14746303.40 | 0.0072 | 0.4599 | 41.2 | 590 | 4.6101E-268 |
| CN1/4220  | acetyl-CoA C-acetyltransferase [EC:2.3.1.9]                     | 2195120.70  | 0           | 0.2007 | 0.0000 | 17.8 | 315 | 5.0676E-26  |
| CN1/8918  | enoyl-CoA hydratase [EC:4.2.1.17]                               | 3180440.50  | 0           | 0.2908 | 0.0000 | 25.6 | 121 | 1.3861E-08  |
| CN2/17714 | succinate dehydrogenase iron-sulfur protein [EC:1.3.99.1]       | 0           | 9449057.33  | 0.0000 | 0.2947 | 59.1 | 235 | 1.7183E-50  |
| CN2/15239 | exodeoxyribonuclease III [EC:3.1.11.2]                          | 0           | 652870.89   | 0.0000 | 0.0204 | 14.4 | 270 | 6.8878E-06  |
| CN1/19418 | type VI secretion system secreted protein VgrG                  | 78382.17    | 0           | 0.0072 | 0.0000 | 15   | 180 | 1.017E-17   |
| CN1/22816 | type VI secretion system secreted protein Hcp                   | 12726625.62 | 0           | 1.1636 | 0.0000 | 15.9 | 164 | 1.862E-48   |
| CN2/3581  | outer membrane channel protein TolC                             | 0           | 755337.14   | 0.0000 | 0.0236 | 39   | 482 | 3.9874E-229 |
| CN2/16142 | preprotein translocase subunit SecA                             | 0           | 663389.90   | 0.0000 | 0.0207 | 8    | 892 | 2.8071E-62  |
| CN1/4558  | outer membrane channel protein TolC                             | 2133645.51  | 786793.67   | 0.1951 | 0.0245 | 31.3 | 166 | 6.7679E-56  |
| CN1/5344  | outer membrane channel protein TolC                             | 1869566.36  | 0           | 0.1709 | 0.0000 | 19.6 | 158 | 1.4844E-12  |
| CN2/16707 | methyl-accepting chemotaxis protein                             | 242317.67   | 537751.83   | 0.0222 | 0.0168 | 28.4 | 676 | 2.5796E-181 |
| CN2/16143 | glutamate N-acetyltransferase / amino-acid N-acetyltransferase  | 0           | 6149150.88  | 0.0000 | 0.1918 | 23   | 405 | 3.0302E-73  |
| CN2/17733 | proline iminopeptidase [EC:3.4.11.5]                            | 0           | 1164993.48  | 0.0000 | 0.0363 | 33   | 324 | 1.8471E-52  |
| CN2/17863 | 4-guanidinobutyraldehyde dehydrogenase / NAD-dependent aldehyde | 0           | 816391.98   | 0.0000 | 0.0255 | 17.2 | 151 | 1.9083E-07  |

|           |                                                                   |             |             |        |        |      |      |             |
|-----------|-------------------------------------------------------------------|-------------|-------------|--------|--------|------|------|-------------|
| CN2/17864 | 4-guanidinobutyraldehyde dehydrogenase / NAD-dependent aldehyde   | 0           | 5849430.99  | 0.0000 | 0.1824 | 44.9 | 345  | 2.2371E-116 |
| CN2/17877 | N-carbamoylputrescine amidase [EC:3.5.1.53]                       | 0           | 6402712.66  | 0.0000 | 0.1997 | 36.5 | 293  | 2.8206E-40  |
| CN2/17941 | arginine deiminase [EC:3.5.3.6]                                   | 0           | 1070447.04  | 0.0000 | 0.0334 | 22.7 | 418  | 7.9467E-46  |
| CN2/18007 | glutamate-5-semialdehyde dehydrogenase [EC:1.2.1.41]              | 52069.98    | 2906341.11  | 0.0048 | 0.0907 | 18.6 | 457  | 8.9763E-33  |
| CN2/2110  | acetylornithine/N-succinyl-diaminopimelate aminotransferase       | 0           | 1044078.79  | 0.0000 | 0.0326 | 29.5 | 308  | 6.0275E-16  |
| CN2/3423  | ornithine decarboxylase [EC:4.1.1.17]                             | 0           | 2394362.50  | 0.0000 | 0.0747 | 20.4 | 387  | 1.1099E-64  |
| CN2/3434  | arginine decarboxylase [EC:4.1.1.19]                              | 0           | 1684943.28  | 0.0000 | 0.0526 | 3.5  | 636  | 0.00089611  |
| CN2/3591  | acetylglutamate kinase [EC:2.7.2.8]                               | 0           | 3180196.10  | 0.0000 | 0.0992 | 21   | 300  | 1.1444E-10  |
| CN2/5119  | acetylornithine/N-succinyl-diaminopimelate aminotransferase       | 0           | 503174.31   | 0.0000 | 0.0157 | 14.1 | 398  | 7.0051E-13  |
| CN2/5598  | oxaloacetate decarboxylase, alpha subunit [EC:4.1.1.3]            | 0           | 1370414.91  | 0.0000 | 0.0427 | 44.2 | 330  | 5.7427E-183 |
| CN2/16840 | proline dehydrogenase [EC:1.5.99.8]                               | 0           | 1933399.47  | 0.0000 | 0.0603 | 9.7  | 1053 | 2.3235E-30  |
| CN2/17213 | N-acetyl-gamma-glutamyl-phosphate reductase [EC:1.2.1.38]         | 0           | 4497218.50  | 0.0000 | 0.1403 | 52.6 | 365  | 1.0955E-77  |
| CN1/1577  | glutamate N-acetyltransferase / amino-acid N-acetyltransferase    | 630882.76   | 1554502.96  | 0.0577 | 0.0485 | 25   | 412  | 3.2996E-75  |
| CN2/0963  | molecular chaperone HtpG                                          | 379962.14   | 2084161.02  | 0.0347 | 0.0650 | 39.9 | 634  | 3.2239E-194 |
| CN2/17310 | catalase [EC:1.11.1.6]                                            | 0           | 598770.83   | 0.0000 | 0.0187 | 29.8 | 486  | 1.8746E-155 |
| CN2/1390  | Cu/Zn superoxide dismutase [EC:1.15.1.1]                          | 0           | 4648075.06  | 0.0000 | 0.1450 | 50.9 | 175  | 8.5031E-66  |
| CN2/15531 | catalase [EC:1.11.1.6]                                            | 142603.37   | 2289376.68  | 0.0130 | 0.0714 | 27.9 | 616  | 6.4017E-37  |
| CN2/17268 | glycyl-tRNA synthetase alpha chain [EC:6.1.1.14]                  | 0           | 1884555.97  | 0.0000 | 0.0588 | 11.4 | 308  | 8.7585E-61  |
| CN2/13325 | lysyl-tRNA synthetase, class II [EC:6.1.1.6]                      | 0           | 1318207.94  | 0.0000 | 0.0411 | 47.6 | 500  | 3.6739E-262 |
| CN2/12037 | phenylalanyl-tRNA synthetase beta chain [EC:6.1.1.20]             | 0           | 664790.74   | 0.0000 | 0.0207 | 13.4 | 792  | 1.8818E-23  |
| CN2/13958 | aspartyl-tRNA(Asn)/glutamyl-tRNA (Gln) amidotransferase subunit B | 64962.55    | 1705040.47  | 0.0059 | 0.0532 | 23.4 | 482  | 3.1387E-54  |
| CN2/13959 | aspartyl-tRNA(Asn)/glutamyl-tRNA (Gln) amidotransferase subunit A | 18930.31    | 2734473.62  | 0.0017 | 0.0853 | 36   | 483  | 1.7335E-110 |
| CN2/16001 | isoleucyl-tRNA synthetase [EC:6.1.1.5]                            | 15408.29    | 880210.69   | 0.0014 | 0.0275 | 24.5 | 943  | 3.3595E-153 |
| CN2/16523 | prolyl-tRNA synthetase [EC:6.1.1.15]                              | 20271.26    | 3357764.58  | 0.0019 | 0.1047 | 26.8 | 571  | 5.1439E-212 |
| CN2/16998 | cysteinyl-tRNA synthetase [EC:6.1.1.16]                           | 0           | 3079219.15  | 0.0000 | 0.0960 | 28.9 | 461  | 1.1908E-60  |
| CN2/16999 | glutaminyl-tRNA synthetase [EC:6.1.1.18]                          | 0           | 1260515.12  | 0.0000 | 0.0393 | 25.7 | 556  | 1.2709E-131 |
| CN2/17990 | leucyl-tRNA synthetase [EC:6.1.1.4]                               | 405371.96   | 1790393.53  | 0.0371 | 0.0558 | 24.1 | 868  | 1.9649E-115 |
| CN2/18104 | methionyl-tRNA formyltransferase [EC:2.1.2.9]                     | 0           | 2266379.30  | 0.0000 | 0.0707 | 26.9 | 334  | 1.5027E-30  |
| CN2/1354  | valyl-tRNA synthetase [EC:6.1.1.9]                                | 69895.12    | 1670667.95  | 0.0064 | 0.0521 | 15.6 | 788  | 1.1532E-109 |
| CN2/14943 | seryl-tRNA synthetase [EC:6.1.1.11]                               | 0           | 1187629.30  | 0.0000 | 0.0370 | 25.4 | 426  | 3.9056E-30  |
| CN2/16517 | aspartyl-tRNA synthetase [EC:6.1.1.12]                            | 2247190.27  | 3081152.10  | 0.2055 | 0.0961 | 15.6 | 591  | 7.8707E-49  |
| CN2/17217 | tyrosyl-tRNA synthetase [EC:6.1.1.1]                              | 0           | 1044043.45  | 0.0000 | 0.0326 | 5.1  | 392  | 0.00040943  |
| CN2/16283 | alanyl-tRNA synthetase [EC:6.1.1.7]                               | 47485.57    | 3047214.85  | 0.0043 | 0.0950 | 40.3 | 874  | 2.415E-196  |
| CN1/22592 | aspartyl-tRNA synthetase [EC:6.1.1.12]                            | 1770451.77  | 0           | 0.1619 | 0.0000 | 29.6 | 81   | 2.4858E-08  |
| CN1/25868 | aspartyl-tRNA synthetase [EC:6.1.1.12]                            | 3023714.70  | 351339.49   | 0.2765 | 0.0110 | 14.1 | 163  | 1.4172E-17  |
| CN2/11948 | Naphthalene dioxygenase (reductase)                               | 601598.83   | 3134127.08  | 0.0550 | 0.0978 | 51.8 | 328  | 1.1705E-186 |
| CN2/18056 | bifunctional protein GlnU [EC:2.7.7.23 2.3.1.157]                 | 89218.43    | 910555.89   | 0.0082 | 0.0284 | 20   | 454  | 2.2388E-41  |
| CN2/3592  | phosphomannomutase [EC:5.4.2.8]                                   | 0           | 797705.12   | 0.0000 | 0.0249 | 3.9  | 852  | 0.000018105 |
| CN2/18130 | UTP--glucose-1-phosphate uridylyltransferase [EC:2.7.7.9]         | 0           | 2356763.34  | 0.0000 | 0.0735 | 49.6 | 125  | 2.2115E-72  |
| CN1/20621 | glucose-6-phosphate isomerase [EC:5.3.1.9]                        | 941013.95   | 0           | 0.0860 | 0.0000 | 15.3 | 550  | 1.3567E-38  |
| CN1/24245 | cytochrome c                                                      | 13367895.24 | 267197.59   | 1.2222 | 0.0083 | 53.2 | 126  | 2.4094E-76  |
| CN1/2015  | cytochrome c                                                      | 556785.11   | 0           | 0.0509 | 0.0000 | 27.9 | 179  | 7.6828E-34  |
| CN1/14736 | glutamin-(asparagin)-ase [EC:3.5.1.38]                            | 6836704.36  | 147946.15   | 0.6251 | 0.0046 | 26.2 | 225  | 2.0445E-47  |
| CN1/21047 | glutamine synthetase [EC:6.3.1.2]                                 | 6098389.77  | 4296700.01  | 0.5576 | 0.1340 | 29.9 | 174  | 2.0003E-50  |
| CN1/21428 | carbamoyl-phosphate synthase large subunit [EC:6.3.5.5]           | 219936.95   | 0           | 0.0201 | 0.0000 | 15.4 | 169  | 1.3983E-06  |
| CN2/12079 | aspartate carbamoyltransferase catalytic subunit [EC:2.1.3.2]     | 0           | 2421959.42  | 0.0000 | 0.0755 | 25.7 | 338  | 1.7712E-44  |
| CN2/12277 | carbamoyl-phosphate synthase small subunit [EC:6.3.5.5]           | 0           | 1851297.86  | 0.0000 | 0.0577 | 29.1 | 382  | 1.0796E-74  |
| CN2/1281  | glutamate dehydrogenase (NADP+) [EC:1.4.1.4]                      | 0           | 1887303.27  | 0.0000 | 0.0589 | 21.1 | 446  | 2.2659E-30  |
| CN2/12908 | glutamine synthetase [EC:6.3.1.2]                                 | 219052.07   | 17423400.73 | 0.0200 | 0.5435 | 66   | 468  | 0           |

|           |                                                                      |             |             |        |        |      |      |             |
|-----------|----------------------------------------------------------------------|-------------|-------------|--------|--------|------|------|-------------|
| CN2/17142 | argininosuccinate synthase [EC:6.3.4.5]                              | 94661.31    | 3483043.74  | 0.0087 | 0.1086 | 56.4 | 406  | 2.8946E-230 |
| CN2/1830  | glutamate synthase (NADPH/NADH) small chain [EC:1.4.1.13 1.4.1.14]   | 65987.04    | 2709832.84  | 0.0060 | 0.0845 | 35.8 | 472  | 1.2672E-81  |
| CN2/2920  | argininosuccinate lyase [EC:4.3.2.1]                                 | 35038.25    | 1408955.72  | 0.0032 | 0.0439 | 22.8 | 464  | 6.6623E-49  |
| CN2/14925 | adenylosuccinate lyase [EC:4.3.2.2]                                  | 131772.41   | 4116467.54  | 0.0120 | 0.1284 | 44.5 | 456  | 3.9914E-164 |
| CN2/3977  | succinate-semialdehyde dehydrogenase (NADP+) [EC:1.2.1.16]           | 0           | 2653360.14  | 0.0000 | 0.0828 | 51.9 | 489  | 0           |
| CN2/0882  | amidophosphoribosyltransferase [EC:2.4.2.14]                         | 144563.20   | 2890462.10  | 0.0132 | 0.0902 | 19.8 | 501  | 1.2099E-82  |
| CN2/15721 | glutamate dehydrogenase [EC:1.4.1.2]                                 | 365709.46   | 757680.09   | 0.0334 | 0.0236 | 20.1 | 1624 | 3.3872E-173 |
| CN2/1829  | glutamate synthase (NADPH/NADH) large chain [EC:1.4.1.13 1.4.1.14]   | 150445.12   | 4743798.76  | 0.0138 | 0.1480 | 41.3 | 1481 | 0           |
| CN2/14479 | adenylosuccinate synthase [EC:6.3.4.4]                               | 225640.61   | 7275481.36  | 0.0206 | 0.2269 | 41.5 | 431  | 1.4418E-255 |
| CN2/12275 | carbamoyl-phosphate synthase large subunit [EC:6.3.5.5]              | 130652.13   | 1371993.73  | 0.0119 | 0.0428 | 29.9 | 1073 | 4.709E-147  |
| CN1/21702 | argininosuccinate synthase [EC:6.3.4.5]                              | 2137245.50  | 614466.90   | 0.1954 | 0.0192 | 42.5 | 261  | 1.8297E-32  |
| CN1/3065  | argininosuccinate synthase [EC:6.3.4.5]                              | 1412729.59  | 0           | 0.1292 | 0.0000 | 22.7 | 150  | 2.135E-98   |
| CN1/4637  | glutamate synthase (NADPH/NADH) small chain [EC:1.4.1.13 1.4.1.14]   | 343666.71   | 0           | 0.0314 | 0.0000 | 11.3 | 302  | 6.9936E-06  |
| CN2/14982 | long-chain acyl-CoA synthetase [EC:6.2.1.3]                          | 0           | 542631.58   | 0.0000 | 0.0169 | 5    | 1203 | 5.2686E-08  |
| CN1/22984 | D-xylose transport system substrate-binding protein                  | 8064629.65  | 33618.27    | 0.7374 | 0.0010 | 74.2 | 93   | 1.1582E-49  |
| CN1/10124 | branched-chain amino acid transport system substrate-binding protein | 18191840.47 | 597482.53   | 1.6633 | 0.0186 | 59.1 | 215  | 5.0407E-188 |
| CN1/18625 | branched-chain amino acid transport system substrate-binding protein | 12387757.31 | 343543.66   | 1.1326 | 0.0107 | 48.8 | 172  | 6.0629E-76  |
| CN1/2180  | branched-chain amino acid transport system substrate-binding protein | 3277079.49  | 0           | 0.2996 | 0.0000 | 25.8 | 163  | 1.8144E-07  |
| CN1/2242  | sulfonate/nitrate/taurine transport system substrate-binding protein | 4451439.71  | 41424.15    | 0.4070 | 0.0013 | 50   | 342  | 2.2555E-85  |
| CN1/22743 | sn-glycerol 3-phosphate transport system substrate-binding protein   | 3379423.13  | 146157.62   | 0.3090 | 0.0046 | 43.8 | 208  | 9.1332E-28  |
| CN1/26125 | peptide/nickel transport system substrate-binding protein            | 740758.37   | 0           | 0.0677 | 0.0000 | 10.3 | 243  | 0.00001215  |
| CN1/6691  | D-methionine transport system substrate-binding protein              | 2522189.55  | 151984.59   | 0.2306 | 0.0047 | 34.4 | 180  | 5.8735E-15  |
| CN1/0120  | sulfonate/nitrate/taurine transport system substrate-binding protein | 2379103.89  | 0           | 0.2175 | 0.0000 | 21.5 | 181  | 2.1886E-28  |
| CN1/9988  | general L-amino acid transport system substrate-binding protein      | 7957550.62  | 0           | 0.7276 | 0.0000 | 30.4 | 115  | 6.567E-09   |
| CN1/0141  | peptide/nickel transport system substrate-binding protein            | 454535.40   | 0           | 0.0416 | 0.0000 | 5.3  | 359  | 0.000010824 |
| CN1/16861 | ribose transport system substrate-binding protein                    | 9734707.81  | 326439.48   | 0.8901 | 0.0102 | 42.6 | 331  | 1.5317E-108 |
| CN1/9446  | branched-chain amino acid transport system substrate-binding protein | 540094.61   | 0           | 0.0494 | 0.0000 | 18.5 | 378  | 1.4068E-67  |
| CN1/12166 | D-methionine transport system substrate-binding protein              | 2640753.47  | 371537.32   | 0.2414 | 0.0116 | 45.6 | 261  | 1.8467E-65  |
| CN1/13135 | glutamate/aspartate transport system substrate-binding protein       | 8900969.61  | 1518272.26  | 0.8138 | 0.0474 | 57.1 | 156  | 1.6174E-62  |
| CN1/13433 | branched-chain amino acid transport system substrate-binding protein | 1404191.46  | 0           | 0.1284 | 0.0000 | 24.6 | 350  | 5.617E-171  |
| CN1/4757  | branched-chain amino acid transport system substrate-binding protein | 7370127.85  | 236592.24   | 0.6739 | 0.0074 | 51.7 | 116  | 2.2709E-206 |
| CN1/5921  | branched-chain amino acid transport system substrate-binding protein | 402846.47   | 0           | 0.0368 | 0.0000 | 9.8  | 204  | 0.00033504  |
| CN1/21409 | branched-chain amino acid transport system substrate-binding protein | 4262096.96  | 276316.03   | 0.3897 | 0.0086 | 33.8 | 364  | 4.6512E-35  |
| CN1/5845  | branched-chain amino acid transport system substrate-binding protein | 1359366.90  | 73956.21    | 0.1243 | 0.0023 | 35.1 | 299  | 6.7327E-70  |
| CN1/11527 | octopine/nopaline transport system substrate-binding protein         | 4471216.15  | 0           | 0.4088 | 0.0000 | 39.9 | 163  | 1.7955E-36  |
| CN1/22156 | peptide/nickel transport system substrate-binding protein            | 24890059.22 | 0           | 2.2757 | 0.0000 | 28.3 | 106  | 6.4672E-07  |
| CN1/23313 | peptide/nickel transport system substrate-binding protein            | 765022.02   | 0           | 0.0699 | 0.0000 | 17.3 | 150  | 1.7816E-13  |
| CN1/14263 | branched-chain amino acid transport system substrate-binding protein | 2650037.38  | 0           | 0.2423 | 0.0000 | 21.4 | 308  | 3.3666E-14  |
| CN1/24315 | dipeptide transport system substrate-binding protein                 | 2083212.52  | 136907.07   | 0.1905 | 0.0043 | 42.1 | 534  | 4.2949E-135 |
| CN1/5273  | branched-chain amino acid transport system substrate-binding protein | 6754691.31  | 145481.59   | 0.6176 | 0.0045 | 32.8 | 174  | 9.0559E-64  |
| CN1/0701  | putative tungstate transport system substrate-binding protein        | 11004122.75 | 345593.59   | 1.0061 | 0.0108 | 69.2 | 237  | 5.9011E-230 |
| CN2/11650 | peptide/nickel transport system substrate-binding protein            | 0           | 544222.27   | 0.0000 | 0.0170 | 4.5  | 1211 | 2.1956E-07  |
| CN2/12653 | branched-chain amino acid transport system substrate-binding protein | 0           | 16742148.72 | 0.0000 | 0.5222 | 36.8 | 182  | 6.6148E-76  |
| CN2/15527 | D-methionine transport system substrate-binding protein              | 0           | 12366281.33 | 0.0000 | 0.3857 | 76.3 | 257  | 0           |
| CN2/16212 | iron(III) transport system substrate-binding protein                 | 68801.45    | 2840813.28  | 0.0063 | 0.0886 | 48.3 | 333  | 1.2714E-79  |
| CN2/17881 | putrescine transport system substrate-binding protein                | 103519.95   | 12505848.36 | 0.0095 | 0.3901 | 50.4 | 802  | 0           |
| CN2/18286 | branched-chain amino acid transport system substrate-binding protein | 837069.69   | 49773010.46 | 0.0765 | 1.5525 | 71.2 | 372  | 0           |
| CN2/18290 | phosphonate transport system substrate-binding protein               | 70320.20    | 6969933.08  | 0.0064 | 0.2174 | 73.5 | 283  | 1.2315E-220 |
| CN2/18340 | phosphate transport system substrate-binding protein                 | 0           | 3053573.38  | 0.0000 | 0.0952 | 36.4 | 321  | 2.4876E-39  |

|           |                                                                      |             |             |        |        |      |      |             |
|-----------|----------------------------------------------------------------------|-------------|-------------|--------|--------|------|------|-------------|
| CN2/5143  | molybdate transport system substrate-binding protein                 | 1138578.17  | 2451328.07  | 0.1041 | 0.0765 | 54.4 | 250  | 1.8659E-87  |
| CN2/15829 | branched-chain amino acid transport system substrate-binding protein | 101328.77   | 18996109.78 | 0.0093 | 0.5925 | 48.9 | 219  | 1.9643E-194 |
| CN2/17678 | general L-amino acid transport system substrate-binding protein      | 176385.45   | 7846623.33  | 0.0161 | 0.2447 | 48.2 | 342  | 4.1009E-212 |
| CN2/3889  | sulfonate/nitrate/taurine transport system substrate-binding protein | 0           | 1620799.88  | 0.0000 | 0.0506 | 23.4 | 329  | 1.0643E-58  |
| CN1/1342  | molybdate transport system substrate-binding protein                 | 11134496.27 | 1172180.74  | 1.0180 | 0.0366 | 57.9 | 273  | 1.5461E-112 |
| CN1/1589  | peptide/nickel transport system substrate-binding protein            | 1179519.30  | 0           | 0.1078 | 0.0000 | 23.4 | 474  | 8.4064E-39  |
| CN1/20852 | branched-chain amino acid transport system substrate-binding protein | 3361638.82  | 74522.21    | 0.3074 | 0.0023 | 19.3 | 394  | 1.6454E-16  |
| CN1/4572  | D-xylose transport system substrate-binding protein                  | 11013425.44 | 3239988.14  | 1.0070 | 0.1011 | 57.1 | 205  | 5.1247E-104 |
| CN1/0472  | peptide/nickel transport system substrate-binding protein            | 711038.04   | 0           | 0.0650 | 0.0000 | 16.1 | 397  | 2.9649E-24  |
| CN1/18589 | putrescine transport system substrate-binding protein                | 19070026.46 | 0           | 1.7436 | 0.0000 | 30.9 | 94   | 8.1756E-23  |
| CN1/20751 | general L-amino acid transport system substrate-binding protein      | 1350498.01  | 0           | 0.1235 | 0.0000 | 40   | 110  | 4.7088E-20  |
| CN1/2830  | putrescine transport system substrate-binding protein                | 8866116.49  | 926542.16   | 0.8106 | 0.0289 | 43.5 | 214  | 3.0373E-160 |
| CN1/7821  | branched-chain amino acid transport system substrate-binding protein | 4775812.11  | 231394.14   | 0.4367 | 0.0072 | 34.1 | 264  | 5.6506E-32  |
| CN1/20323 | peptide/nickel transport system substrate-binding protein            | 817603.27   | 0           | 0.0748 | 0.0000 | 13.2 | 538  | 4.9969E-192 |
| CN1/11488 | iron(III) transport system substrate-binding protein                 | 1009222.95  | 0           | 0.0923 | 0.0000 | 7.5  | 332  | 2.3277E-06  |
| CN1/8815  | putative multiple sugar transport system substrate-binding protein   | 569301.82   | 1418919.12  | 0.0521 | 0.0443 | 13.4 | 366  | 1.0231E-14  |
| CN2/17371 | Catechol 2,3-dioxygenase                                             | 0           | 2237812.86  | 0.0000 | 0.0698 | 11.7 | 307  | 4.4192E-19  |
| CN1/25671 | carboxymethylenebutenolidase [EC:3.1.1.45]                           | 2951096.49  | 71052.13    | 0.2698 | 0.0022 | 33.8 | 231  | 3.8947E-58  |
| CN1/24538 | carboxymethylenebutenolidase [EC:3.1.1.45]                           | 1207741.59  | 0           | 0.1104 | 0.0000 | 39.5 | 76   | 1.0935E-07  |
| CN2/17367 | 4-Hydroxy-2-oxovalerate aldolase                                     | 28999.24    | 17964462.87 | 0.0027 | 0.5603 | 44.2 | 344  | 3.7332E-134 |
| CN2/1894  | carboxymethylenebutenolidase [EC:3.1.1.45]                           | 0           | 3559015.19  | 0.0000 | 0.1110 | 50.7 | 268  | 6.8874E-67  |
| CN1/0954  | carboxymethylenebutenolidase [EC:3.1.1.45]                           | 5480025.36  | 79879.07    | 0.5010 | 0.0025 | 50.9 | 285  | 4.4969E-175 |
| CN2/14496 | aldehyde dehydrogenase (NAD+) [EC:1.2.1.3]                           | 79441.68    | 12615144.30 | 0.0073 | 0.3935 | 60.5 | 506  | 0           |
| CN2/17957 | alcohol dehydrogenase (acceptor) [EC:1.1.99.8]                       | 115632.31   | 4710539.71  | 0.0106 | 0.1469 | 41.2 | 590  | 3.0315E-185 |
| CN2/13496 | aldehyde dehydrogenase (NAD+) [EC:1.2.1.3]                           | 0           | 2371610.87  | 0.0000 | 0.0740 | 75   | 88   | 1.8897E-145 |
| CN2/0266  | aldehyde dehydrogenase (NAD+) [EC:1.2.1.3]                           | 5903.87     | 455819.23   | 0.0005 | 0.0142 | 44.9 | 321  | 6.315E-266  |
| CN1/21617 | Unknown function                                                     | 2325564.63  | 225870.52   | 0.2126 | 0.0070 | 35.8 | 193  | 9.759E-12   |
| CN2/16569 | Unknown function                                                     | 105446.45   | 9165046.53  | 0.0096 | 0.2859 | 69   | 503  | 0           |
| CN2/0810  | S-(hydroxymethyl)glutathione dehydrogenase / alcohol dehydrogenase   | 0           | 1451409.44  | 0.0000 | 0.0453 | 30.5 | 371  | 4.9043E-39  |
| CN2/0829  | alcohol dehydrogenase [EC:1.1.1.1]                                   | 0           | 1415676.12  | 0.0000 | 0.0442 | 44.2 | 425  | 4.602E-56   |
| CN2/13226 | alcohol dehydrogenase [EC:1.1.1.1]                                   | 164027.30   | 3701291.98  | 0.0150 | 0.1154 | 44.7 | 340  | 2.6024E-115 |
| CN2/14077 | alcohol dehydrogenase [EC:1.1.1.1]                                   | 0           | 2853599.21  | 0.0000 | 0.0890 | 37.8 | 357  | 1.5754E-42  |
| CN2/14149 | alcohol dehydrogenase [EC:1.1.1.1]                                   | 0           | 2121582.14  | 0.0000 | 0.0662 | 52.7 | 330  | 2.6007E-107 |
| CN2/14228 | alcohol dehydrogenase [EC:1.1.1.1]                                   | 219116.24   | 5539168.82  | 0.0200 | 0.1728 | 62.6 | 388  | 0           |
| CN2/17718 | Unknown function                                                     | 114300.55   | 2468423.09  | 0.0105 | 0.0770 | 22.3 | 596  | 2.7381E-98  |
| CN2/17719 | alcohol dehydrogenase [EC:1.1.1.1]                                   | 0           | 3576707.68  | 0.0000 | 0.1116 | 27   | 385  | 1.8458E-144 |
| CN2/15838 | Unknown function                                                     | 119819.15   | 488900.71   | 0.0110 | 0.0152 | 10.7 | 1259 | 9.3414E-34  |
| CN2/16351 | alcohol dehydrogenase [EC:1.1.1.1]                                   | 287443.87   | 4438562.88  | 0.0263 | 0.1384 | 34.3 | 335  | 2.0892E-23  |
| CN1/0477  | OmpA-OmpF porin, OOP family                                          | 2959758.36  | 0           | 0.2706 | 0.0000 | 51.2 | 86   | 1.2172E-72  |
| CN1/21052 | Naphthalene dioxygenase (beta)                                       | 20653305.70 | 15632289.36 | 1.8884 | 0.4876 | 79.7 | 79   | 6.8527E-172 |
| CN2/11667 | elongation factor EF-G [EC:3.6.5.3]                                  | 0           | 2028250.47  | 0.0000 | 0.0633 | 28.6 | 63   | 0.0049088   |
| CN1/14685 | Azospirillum B510 uid46085                                           | 2026955.55  | 0           | 0.1853 | 0.0000 | 24.7 | 170  | 1.9445E-24  |
| CN1/2182  | Unknown function                                                     | 2127619.69  | 0           | 0.1945 | 0.0000 | 47.3 | 184  | 1.142E-86   |
| CN2/15067 | ribosome recycling factor                                            | 0           | 2858578.27  | 0.0000 | 0.0892 | 50.3 | 185  | 1.2287E-128 |
| CN2/15515 | NADPH2:quinone reductase [EC:1.6.5.5]                                | 37889.32    | 2809307.94  | 0.0035 | 0.0876 | 51.1 | 325  | 7.2248E-110 |
| CN2/17901 | Membrane lipoprotein lipid attachment site containing protein USSDB6 | 0           | 1496805.19  | 0.0000 | 0.0467 | 21.4 | 206  | 2.2349E-27  |
| CN2/17339 | elongation factor EF-G [EC:3.6.5.3]                                  | 62324.29    | 17160351.48 | 0.0057 | 0.5352 | 73.1 | 495  | 0           |
| CN1/22376 | Uncharacterized protein conserved in bacteria                        | 972659.66   | 0           | 0.0889 | 0.0000 | 13.7 | 322  | 2.9955E-06  |
| CN2/12385 | Outer membrane protein (porin)                                       | 0           | 756088.63   | 0.0000 | 0.0236 | 22.4 | 228  | 7.322E-25   |

|           |                                                                                    |             |             |        |        |      |      |             |
|-----------|------------------------------------------------------------------------------------|-------------|-------------|--------|--------|------|------|-------------|
| CN2/12463 | Outer membrane protein (porin)                                                     | 194131.66   | 13343466.37 | 0.0177 | 0.4162 | 68.9 | 225  | 0           |
| CN2/11528 | TRAP-type mannitol/chloroaromatic compound transport system, periplasmic component | 10549341.82 | 622436.88   | 0.9645 | 0.0194 | 15.9 | 378  | 2.6264E-74  |
| CN1/21660 | putative spermidine/putrescine transport system substrate-binding                  | 7275296.32  | 237607.96   | 0.6652 | 0.0074 | 22.4 | 340  | 2.0561E-57  |
| CN1/24218 | Unknown function                                                                   | 10517896.06 | 0           | 0.9617 | 0.0000 | 39.8 | 88   | 3.1841E-22  |
| CN1/6117  | UDP-3-keto-D-GlcNAcA aminotransferase [EC:2.6.1.-]                                 | 277281.10   | 0           | 0.0254 | 0.0000 | 5.3  | 741  | 1.3415E-22  |
| CN1/5537  | Outer membrane protein (porin)                                                     | 38874269.68 | 578179.82   | 3.5543 | 0.0180 | 52.5 | 335  | 0           |
| CN2/17358 | 3-oxoacyl-[acyl-carrier protein] reductase (EC 1.1.1.100)                          | 0           | 14609397.11 | 0.0000 | 0.4557 | 68.1 | 257  | 0           |
| CN1/25150 | Adenosylmethionine-8-amino-7-oxononanoate aminotransferase                         | 320296.97   | 0           | 0.0293 | 0.0000 | 6.6  | 483  | 0.000007003 |
| CN1/25151 | TonB-dependent receptor                                                            | 1551607.71  | 0           | 0.1419 | 0.0000 | 12.4 | 573  | 8.0436E-22  |
| CN1/11478 | outer membrane protein                                                             | 735372.79   | 0           | 0.0672 | 0.0000 | 28.6 | 70   | 0.00057539  |
| CN1/11723 | peroxiredoxin (alkyl hydroperoxide reductase subunit C)                            | 13542504.70 | 16304918.78 | 1.2382 | 0.5086 | 61.8 | 102  | 9.3921E-99  |
| CN1/11796 | ABC-type uncharacterized transport system, auxiliary component                     | 170309.01   | 0           | 0.0156 | 0.0000 | 36.2 | 160  | 3.8706E-28  |
| CN1/12077 | Uncharacterized conserved protein                                                  | 324859.70   | 0           | 0.0297 | 0.0000 | 18.3 | 191  | 1.7945E-06  |
| CN1/13821 | FKBP-type peptidyl-prolyl cis-trans isomerase FkpA [EC:5.2.1.8]                    | 2947786.63  | 0           | 0.2695 | 0.0000 | 15.9 | 107  | 0.000058041 |
| CN1/14794 | Uncharacterized protein conserved in bacteria                                      | 2513430.51  | 0           | 0.2298 | 0.0000 | 34.9 | 195  | 2.0668E-17  |
| CN1/15192 | iron complex outermembrane receptor protein                                        | 365216.49   | 39574.75    | 0.0334 | 0.0012 | 13.7 | 358  | 6.7155E-43  |
| CN1/16478 | iron complex outermembrane receptor protein                                        | 289834.31   | 0           | 0.0265 | 0.0000 | 14.4 | 181  | 2.1603E-09  |
| CN1/16841 | Unknown function                                                                   | 18599734.87 | 0           | 1.7006 | 0.0000 | 38.4 | 73   | 9.9295E-09  |
| CN1/19027 | Unknown function                                                                   | 1102373.60  | 0           | 0.1008 | 0.0000 | 30.4 | 102  | 4.216E-08   |
| CN1/24974 | simple sugar transport system substrate-binding protein                            | 1975651.37  | 659629.26   | 0.1806 | 0.0206 | 36.6 | 238  | 7.2373E-29  |
| CN1/25732 | Unknown function                                                                   | 352049.31   | 0           | 0.0322 | 0.0000 | 20.4 | 167  | 4.9963E-07  |
| CN1/26001 | OmpA-OmpF porin, OOP family                                                        | 10819898.77 | 242300.91   | 0.9893 | 0.0076 | 63.4 | 142  | 5.4658E-113 |
| CN1/26178 | OmpA-OmpF porin, OOP family                                                        | 2194198.89  | 0           | 0.2006 | 0.0000 | 57.8 | 102  | 3.3944E-158 |
| CN1/26408 | Outer membrane protein (porin)                                                     | 6129628.10  | 412043.38   | 0.5604 | 0.0129 | 57.2 | 215  | 2.0084E-203 |
| CN1/26758 | thiol:disulfide interchange protein DsbA                                           | 2414134.82  | 0           | 0.2207 | 0.0000 | 45.6 | 103  | 3.4859E-25  |
| CN1/3177  | polar amino acid transport system substrate-binding protein                        | 921903.07   | 0           | 0.0843 | 0.0000 | 27.4 | 208  | 1.6788E-62  |
| CN1/5178  | peroxiredoxin (alkyl hydroperoxide reductase subunit C)                            | 1314924.92  | 4281.71     | 0.1202 | 0.0001 | 52.8 | 89   | 2.6057E-61  |
| CN1/8884  | peptidyl-prolyl cis-trans isomerase C [EC:5.2.1.8]                                 | 198720.44   | 320227.86   | 0.0182 | 0.0100 | 21.4 | 201  | 1.9789E-26  |
| CN1/9884  | iron complex outermembrane receptor protein                                        | 709898.28   | 0           | 0.0649 | 0.0000 | 30.3 | 165  | 1.011E-26   |
| CN1/5146  | copper resistance protein B                                                        | 1104504.31  | 327738.98   | 0.1010 | 0.0102 | 12.7 | 150  | 0.00050301  |
| CN1/7710  | putative ABC transport system substrate-binding protein                            | 8021361.34  | 0           | 0.7334 | 0.0000 | 45.9 | 157  | 2.2616E-16  |
| CN1/12257 | Outer membrane protein (porin)                                                     | 12344733.71 | 2377619.65  | 1.1287 | 0.0742 | 30   | 237  | 6.385E-70   |
| CN2/0121  | Zn-dependent hydrolases, including glyoxylases                                     | 43317.62    | 22724029.06 | 0.0040 | 0.7088 | 68.1 | 326  | 1.9874E-211 |
| CN1/20858 | putative 3-hydroxyphenylpropionic acid porine                                      | 1554796.96  | 26403024.68 | 0.1422 | 0.8235 | 15.9 | 151  | 6.374E-37   |
| CN1/0246  | Unknown function                                                                   | 658310.02   | 2138171.97  | 0.0602 | 0.0667 | 6.7  | 1090 | 2.5707E-13  |
| CN1/19236 | Uncharacterized protein related to plant photosystem II stability/assembly factor  | 1384284.33  | 25897.93    | 0.1266 | 0.0008 | 13.6 | 338  | 1.9772E-25  |
| CN1/5522  | Unknown function                                                                   | 1310952.83  | 0           | 0.1199 | 0.0000 | 8    | 464  | 7.6954E-12  |
| CN1/4879  | Tricarboxylate transport protein Tct                                               | 3328087.27  | 651655.68   | 0.3043 | 0.0203 | 28.6 | 280  | 5.0147E-26  |
| CN1/20107 | TonB-dependent receptor                                                            | 309411.38   | 0           | 0.0283 | 0.0000 | 12.7 | 497  | 4.2126E-67  |
| CN1/8487  | multiple sugar transport system substrate-binding protein                          | 8281758.07  | 0           | 0.7572 | 0.0000 | 53.9 | 76   | 6.5422E-16  |
| CN1/5006  | TolB protein                                                                       | 2005453.82  | 45262.25    | 0.1834 | 0.0014 | 19.9 | 282  | 2.0231E-62  |
| CN1/5808  | ammonium transporter, Amt family                                                   | 2290649.80  | 0           | 0.2094 | 0.0000 | 42   | 69   | 1.985E-08   |
| CN1/6424  | TRAP-type mannitol/chloroaromatic compound transport system                        | 18345199.05 | 211679.38   | 1.6773 | 0.0066 | 30.2 | 242  | 3.7323E-96  |
| CN1/6528  | TRAP-type mannitol/chloroaromatic compound transport system                        | 13393151.19 | 0           | 1.2246 | 0.0000 | 29.3 | 164  | 9.5148E-63  |
| CN1/8007  | molybdate transport system regulatory protein                                      | 2351921.03  | 0           | 0.2150 | 0.0000 | 32.4 | 68   | 2.3826E-10  |
| CN1/8259  | acyl carrier protein                                                               | 4488969.75  | 0           | 0.4104 | 0.0000 | 16.5 | 79   | 2.076E-11   |
| CN2/16717 | Unknown function                                                                   | 20764.75    | 1972536.97  | 0.0019 | 0.0615 | 42.2 | 453  | 1.6018E-96  |
| CN1/10473 | Unknown function                                                                   | 217193.20   | 0           | 0.0199 | 0.0000 | 13.1 | 198  | 0.00013872  |

|           |                                                                            |             |             |        |        |      |     |             |
|-----------|----------------------------------------------------------------------------|-------------|-------------|--------|--------|------|-----|-------------|
| CN1/19990 | Alkylphosphonate utilization operon protein Phn                            | 669286.52   | 0           | 0.0612 | 0.0000 | 10.3 | 321 | 0.000025825 |
| CN1/16278 | chloride peroxidase [EC:1.11.1.10]                                         | 1352105.95  | 0           | 0.1236 | 0.0000 | 24.8 | 278 | 6.0006E-60  |
| CN1/15691 | isoquinoline 1-oxidoreductase, beta subunit [EC:1.3.99.16]                 | 2603713.29  | 111049.00   | 0.2381 | 0.0035 | 30.9 | 320 | 3.6393E-74  |
| CN1/5064  | TRAP-type mannitol/chloroaromatic compound transport system                | 17171142.21 | 45995.86    | 1.5700 | 0.0014 | 23.6 | 123 | 1.6245E-34  |
| CN1/6522  | Unknown function                                                           | 252733.16   | 166591.30   | 0.0231 | 0.0052 | 16.3 | 459 | 8.673E-20   |
| CN1/9140  | Trp repressor binding protein                                              | 1293099.55  | 827983.63   | 0.1182 | 0.0258 | 32.8 | 128 | 4.504E-17   |
| CN1/27123 | autoaggregation protein RapA/B/C                                           | 3051009.90  | 202458.22   | 0.2790 | 0.0063 | 36.3 | 256 | 1.6067E-161 |
| CN2/17349 | aryl-alcohol dehydrogenase (NADP+) [EC:1.1.1.91]                           | 0           | 1013985.57  | 0.0000 | 0.0316 | 15.5 | 343 | 3.0498E-45  |
| CN1/11117 | polar amino acid transport system substrate-binding protein                | 3188188.85  | 175999.98   | 0.2915 | 0.0055 | 67   | 261 | 2.9604E-179 |
| CN1/18498 | TRAP-type C4-dicarboxylate transport system, periplasmic component         | 893288.27   | 0           | 0.0817 | 0.0000 | 8.6  | 303 | 6.3775E-33  |
| CN1/16755 | simple sugar transport system substrate-binding protein                    | 1393812.70  | 10823.29    | 0.1274 | 0.0003 | 39.5 | 157 | 1.3529E-16  |
| CN1/11755 | Outer membrane protein/protective antigen OMA87                            | 5316092.27  | 0           | 0.4861 | 0.0000 | 37.8 | 90  | 2.9362E-40  |
| CN1/14868 | Rubryerythrin                                                              | 3980639.24  | 0           | 0.3640 | 0.0000 | 37.2 | 137 | 3.1479E-136 |
| CN1/22033 | simple sugar transport system substrate-binding protein                    | 1527676.56  | 0           | 0.1397 | 0.0000 | 15.3 | 413 | 1.1702E-98  |
| CN1/24001 | 2-Hydroxychromene-2-carboxylate isomerase                                  | 5585275.98  | 4475435.28  | 0.5107 | 0.1396 | 56.8 | 199 | 6.8289E-204 |
| CN1/24003 | outer membrane protein                                                     | 11466397.21 | 13581614.11 | 1.0484 | 0.4236 | 55.6 | 153 | 1.9646E-149 |
| CN2/11941 | outer membrane protein                                                     | 0           | 50188189.94 | 0.0000 | 1.5654 | 35   | 180 | 3.2096E-116 |
| CN2/11945 | Naphthalene dioxygenase (beta)                                             | 245103.68   | 32738920.68 | 0.0224 | 1.0212 | 63.9 | 194 | 0           |
| CN2/15794 | Naphthalene dioxygenase (alpha)                                            | 5717664.52  | 2312838.17  | 0.5228 | 0.0721 | 69.4 | 284 | 0           |
| CN2/17233 | Naphthalene dihydrodiol dehydrogenase                                      | 270367.83   | 3154740.66  | 0.0247 | 0.0984 | 91.9 | 62  | 0           |
| CN1/27023 | electron transfer flavoprotein alpha subunit                               | 1148232.65  | 0           | 0.1050 | 0.0000 | 57.1 | 91  | 1.2525E-12  |
| CN1/9298  | peroxiredoxin (alkyl hydroperoxide reductase subunit C)                    | 1801409.70  | 142461.74   | 0.1647 | 0.0044 | 51.3 | 187 | 6.6374E-43  |
| CN2/0275  | Xylulose-5-phosphate phosphoketolase (EC 4.1.2.9)                          | 0           | 1090210.33  | 0.0000 | 0.0340 | 23.1 | 801 | 6.7064E-46  |
| CN2/0456  | outer membrane lipase/esterase                                             | 0           | 1540765.57  | 0.0000 | 0.0481 | 16.8 | 637 | 1.701E-53   |
| CN2/0457  | Unknown function                                                           | 0           | 1389441.65  | 0.0000 | 0.0433 | 35.3 | 292 | 4.9516E-109 |
| CN2/0475  | chaperonin GroES                                                           | 764448.49   | 17376547.98 | 0.0699 | 0.5420 | 80.4 | 97  | 5.6298E-176 |
| CN2/0787  | Unknown function                                                           | 0           | 4934046.19  | 0.0000 | 0.1539 | 44.6 | 83  | 8.9817E-08  |
| CN2/0797  | Universal stress protein family                                            | 0           | 13838701.26 | 0.0000 | 0.4316 | 54.5 | 143 | 2.386E-38   |
| CN2/0837  | (1->4)-alpha-D-glucan 1-alpha-D-glucosylmutase [EC:5.4.99.15]              | 0           | 1886024.19  | 0.0000 | 0.0588 | 16.9 | 951 | 5.5492E-36  |
| CN2/0839  | maltooligosyltrehalose trehalohydrolase [EC:3.2.1.141]                     | 0           | 995966.49   | 0.0000 | 0.0311 | 13.7 | 590 | 6.5453E-55  |
| CN2/0875  | uncharacterized membrane protein                                           | 0           | 499780.45   | 0.0000 | 0.0156 | 12.3 | 920 | 6.3103E-52  |
| CN2/1035  | molybdenum cofactor biosynthesis protein B                                 | 0           | 1544521.05  | 0.0000 | 0.0482 | 27.1 | 181 | 2.2342E-42  |
| CN2/1036  | molybdopterin biosynthesis protein MoeA                                    | 0           | 5199119.27  | 0.0000 | 0.1622 | 16.6 | 410 | 1.0411E-34  |
| CN2/11629 | trigger factor                                                             | 47839.10    | 5459099.65  | 0.0044 | 0.1703 | 47.2 | 436 | 0           |
| CN2/11630 | cell division protein ZipA                                                 | 0           | 7325839.12  | 0.0000 | 0.2285 | 9.5  | 273 | 5.1291E-16  |
| CN2/11655 | peptidyl-prolyl cis-trans isomerase D [EC:5.2.1.8]                         | 0           | 465293.15   | 0.0000 | 0.0145 | 14.3 | 614 | 1.842E-10   |
| CN2/11656 | DNA-binding protein HU-beta                                                | 0           | 24075985.76 | 0.0000 | 0.7509 | 47.8 | 90  | 3.2948E-36  |
| CN2/11768 | FKBP-type peptidyl-prolyl cis-trans isomerase FkIB [EC:5.2.1.8]            | 100015.06   | 6991568.43  | 0.0091 | 0.2181 | 49.2 | 252 | 0           |
| CN2/11888 | Na+-transporting NADH:ubiquinone oxidoreductase subunit A                  | 0           | 2234632.38  | 0.0000 | 0.0697 | 13.7 | 445 | 2.1269E-06  |
| CN2/12021 | Uncharacterized conserved protein                                          | 605222.13   | 14699653.57 | 0.0553 | 0.4585 | 54.5 | 134 | 1.2205E-103 |
| CN2/12022 | Tricarboxylate porin Opd                                                   | 163371.77   | 44113227.63 | 0.0149 | 1.3759 | 76   | 420 | 0           |
| CN2/12033 | translation initiation factor IF-3                                         | 0           | 1247485.68  | 0.0000 | 0.0389 | 22.6 | 177 | 7.3124E-25  |
| CN2/12281 | molecular chaperone GrpE                                                   | 480318.43   | 3195527.31  | 0.0439 | 0.0997 | 32.6 | 187 | 3.7337E-42  |
| CN2/12291 | Predicted L-lactate dehydrogenase, Iron-sulfur cluster-binding subunit Ykg | 0           | 566868.47   | 0.0000 | 0.0177 | 17.5 | 486 | 2.6123E-19  |
| CN2/12320 | hypothetical protein                                                       | 0           | 9103235.27  | 0.0000 | 0.2839 | 61.7 | 115 | 1.5965E-62  |
| CN2/12333 | DNA-binding protein HU-alpha                                               | 0           | 4656308.93  | 0.0000 | 0.1452 | 32.2 | 90  | 3.4756E-25  |
| CN2/12338 | LemA protein                                                               | 192462.28   | 6569621.08  | 0.0176 | 0.2049 | 32.2 | 202 | 1.9216E-139 |
| CN2/12346 | TdcF protein                                                               | 0           | 4982579.32  | 0.0000 | 0.1554 | 69   | 126 | 7.4834E-47  |
| CN2/12419 | DNA topoisomerase I [EC:5.99.1.2]                                          | 0           | 328246.45   | 0.0000 | 0.0102 | 6.9  | 866 | 4.061E-10   |



|           |                                                                  |            |             |        |        |      |     |             |
|-----------|------------------------------------------------------------------|------------|-------------|--------|--------|------|-----|-------------|
| CN2/12749 | cell division protein FtsA                                       | 0          | 1210581.99  | 0.0000 | 0.0378 | 15.3 | 418 | 1.1667E-13  |
| CN2/12760 | Zn-dependent protease with chaperone function                    | 0          | 1389391.32  | 0.0000 | 0.0433 | 24.8 | 270 | 6.2483E-24  |
| CN2/12765 | Unknown function                                                 | 0          | 856066.65   | 0.0000 | 0.0267 | 16.6 | 453 | 1.4016E-17  |
| CN2/12766 | uncharacterized lipoprotein                                      | 0          | 6491535.90  | 0.0000 | 0.2025 | 53.6 | 194 | 6.6471E-221 |
| CN2/12791 | iron complex outer membrane receptor protein                     | 55711.37   | 1528792.78  | 0.0051 | 0.0477 | 28.8 | 278 | 2.303E-30   |
| CN2/1280  | Unknown function                                                 | 39079.41   | 1646636.56  | 0.0036 | 0.0514 | 19   | 564 | 1.9971E-55  |
| CN2/1284  | 4-methyl-5(b-hydroxyethyl)-thiazole monophosphate biosynthesis   | 0          | 3483583.24  | 0.0000 | 0.1087 | 18.4 | 185 | 4.1566E-23  |
| CN2/12849 | cytosolic long-chain acyl-CoA thioester hydrolase family protein | 130404.16  | 18528832.24 | 0.0119 | 0.5779 | 59.9 | 269 | 1.1941E-185 |
| CN2/12910 | GTP-binding protein                                              | 0          | 1793998.88  | 0.0000 | 0.0560 | 15   | 606 | 5.5277E-22  |
| CN2/12930 | oligopeptidase A [EC:3.4.24.70]                                  | 48731.56   | 1264172.35  | 0.0045 | 0.0394 | 16.5 | 683 | 3.5104E-34  |
| CN2/12947 | elongation factor EF-G [EC:3.6.5.3]                              | 33825.02   | 9960815.84  | 0.0031 | 0.3107 | 40.2 | 204 | 2.6602E-89  |
| CN2/13081 | FOG: TPR repeat                                                  | 85533.30   | 943662.23   | 0.0078 | 0.0294 | 25.9 | 586 | 1.7471E-78  |
| CN2/13230 | F0F1-type ATP synthase, beta subunit                             | 433110.09  | 3924207.02  | 0.0396 | 0.1224 | 59.5 | 126 | 5.2963E-30  |
| CN2/13268 | Uncharacterized conserved protein                                | 0          | 3271681.80  | 0.0000 | 0.1020 | 14.6 | 144 | 4.6796E-27  |
| CN2/13353 | serine 3-dehydrogenase [EC:1.1.1.276]                            | 0          | 5060486.38  | 0.0000 | 0.1578 | 41.3 | 254 | 1.6732E-112 |
| CN2/13383 | Unknown function                                                 | 0          | 2723745.03  | 0.0000 | 0.0850 | 27.4 | 223 | 6.2166E-66  |
| CN2/13435 | iron complex outer membrane receptor protein                     | 115055.10  | 2764109.05  | 0.0105 | 0.0862 | 38.9 | 620 | 0           |
| CN2/13463 | polysaccharide export outer membrane protein                     | 123993.41  | 5636789.31  | 0.0113 | 0.1758 | 64   | 358 | 0           |
| CN2/13558 | Mlr7403 protein                                                  | 0          | 787992.19   | 0.0000 | 0.0246 | 31.9 | 213 | 3.3739E-44  |
| CN2/13562 | type IV pilus assembly protein PilF                              | 0          | 716688.96   | 0.0000 | 0.0224 | 18.7 | 251 | 1.4606E-81  |
| CN2/1357  | electron-transferring-flavoprotein dehydrogenase [EC:1.5.5.1]    | 67584.73   | 2384738.94  | 0.0062 | 0.0744 | 29.2 | 551 | 2.1173E-51  |
| CN2/1359  | electron transfer flavoprotein beta subunit                      | 0          | 5420774.53  | 0.0000 | 0.1691 | 32.1 | 249 | 1.618E-98   |
| CN2/1360  | electron transfer flavoprotein alpha subunit                     | 4631609.93 | 9016180.12  | 0.4235 | 0.2812 | 58.3 | 309 | 7.3995E-204 |
| CN2/1369  | Unknown function                                                 | 0          | 3567363.75  | 0.0000 | 0.1113 | 36   | 353 | 5.7053E-77  |
| CN2/13795 | ATPases with chaperone activity, ATP-binding subunit             | 0          | 4138363.04  | 0.0000 | 0.1291 | 33.1 | 118 | 3.0135E-27  |
| CN2/13911 | hypothetical protein                                             | 0          | 1222144.56  | 0.0000 | 0.0381 | 19.7 | 142 | 0.00015178  |
| CN2/13966 | ribonuclease G [EC:3.1.26.-]                                     | 0          | 772906.01   | 0.0000 | 0.0241 | 16.5 | 485 | 8.5347E-10  |
| CN2/13969 | TldD protein                                                     | 0          | 794024.16   | 0.0000 | 0.0248 | 17.3 | 480 | 1.0763E-58  |
| CN2/13971 | PmbA protein                                                     | 0          | 1252041.10  | 0.0000 | 0.0391 | 31   | 448 | 3.6327E-87  |
| CN2/13975 | putative sigma-54 modulation protein                             | 0          | 4986807.56  | 0.0000 | 0.1555 | 44.1 | 102 | 1.4657E-20  |
| CN2/14058 | Unknown function                                                 | 47748.90   | 10571177.97 | 0.0044 | 0.3297 | 63.1 | 317 | 0           |
| CN2/14145 | Molecular chaperone (small heat shock protein)                   | 194150.89  | 32774659.48 | 0.0178 | 1.0223 | 56.5 | 177 | 3.8639E-57  |
| CN2/14220 | ammonium transporter, Amt family                                 | 0          | 4485764.06  | 0.0000 | 0.1399 | 6.3  | 426 | 0.000038407 |
| CN2/14221 | nitrogen regulatory protein P-II 2                               | 57690.17   | 14778951.74 | 0.0053 | 0.4610 | 57.1 | 112 | 3.3448E-37  |
| CN2/14233 | GTP pyrophosphokinase (EC 2.7.6.5), (p)ppGpp synthetase          | 200180.17  | 0           | 0.0183 | 0.0000 | 13   | 123 | 0.00070318  |
| CN2/14333 | bacterioferritin                                                 | 51633.19   | 16503074.74 | 0.0047 | 0.5147 | 70.5 | 156 | 1.1713E-81  |
| CN2/14338 | NADH:flavin oxidoreductases, Old Yellow Enzyme family            | 28045.61   | 2881386.50  | 0.0026 | 0.0899 | 45   | 369 | 6.426E-145  |
| CN2/14563 | OmpA-OmpF porin, OOP family                                      | 36700.90   | 6219913.32  | 0.0034 | 0.1940 | 60   | 260 | 1.8188E-286 |
| CN2/14613 | F0F1-type ATP synthase, beta subunit                             | 0          | 1235464.26  | 0.0000 | 0.0385 | 44.5 | 119 | 1.5657E-17  |
| CN2/14664 | Unknown function                                                 | 0          | 1508266.43  | 0.0000 | 0.0470 | 27.5 | 222 | 1.5186E-29  |
| CN2/14724 | Unknown function                                                 | 0          | 1635746.11  | 0.0000 | 0.0510 | 46.2 | 158 | 2.4142E-106 |
| CN2/1475  | Lipid A biosynthesis lauroyl acyltransferase (EC 2.3.1.-)        | 0          | 3680780.15  | 0.0000 | 0.1148 | 49.5 | 192 | 8.0859E-42  |
| CN2/14940 | outer membrane lipoproteins carrier protein                      | 0          | 1655572.56  | 0.0000 | 0.0516 | 28.4 | 215 | 1.043E-54   |
| CN2/15053 | Predicted periplasmic/secreted protein                           | 0          | 1446205.28  | 0.0000 | 0.0451 | 18.8 | 234 | 3.0867E-10  |
| CN2/15061 | outer membrane protein                                           | 21917.10   | 5084840.04  | 0.0020 | 0.1586 | 40.9 | 171 | 2.3406E-52  |
| CN2/15062 | outer membrane protein                                           | 0          | 2151054.58  | 0.0000 | 0.0671 | 19   | 795 | 2.1055E-40  |
| CN2/15071 | methionyl aminopeptidase [EC:3.4.11.18]                          | 0          | 2659417.43  | 0.0000 | 0.0829 | 18.5 | 260 | 9.6316E-20  |
| CN2/15079 | outer membrane lipoprotein SlyB                                  | 59610.56   | 16837870.15 | 0.0055 | 0.5252 | 64.1 | 153 | 4.3291E-118 |
| CN2/15156 | solute:Na+ symporter, SSS family                                 | 0          | 403570.58   | 0.0000 | 0.0126 | 7.9  | 393 | 1.7167E-06  |

|           |                                                                            |             |             |        |        |      |     |             |
|-----------|----------------------------------------------------------------------------|-------------|-------------|--------|--------|------|-----|-------------|
| CN2/15164 | Glycine cleavage system protein P (pyridoxal-binding), C-terminal domain   | 1154580.41  | 17193765.40 | 0.1056 | 0.5363 | 55.4 | 157 | 6.6122E-113 |
| CN2/15309 | Unknown function                                                           | 0           | 1755987.83  | 0.0000 | 0.0548 | 13.5 | 222 | 0.00029571  |
| CN2/15310 | Unknown function                                                           | 81538.01    | 2921473.52  | 0.0075 | 0.0911 | 50.5 | 216 | 1.2617E-39  |
| CN2/15318 | glycine cleavage system transcriptional repressor                          | 0           | 2564665.64  | 0.0000 | 0.0800 | 52.3 | 172 | 1.6899E-28  |
| CN2/15512 | Uncharacterized protein with LysM domain, COG1652                          | 0           | 1501096.45  | 0.0000 | 0.0468 | 37.2 | 341 | 1.6129E-78  |
| CN2/15523 | iron complex outermembrane receptor protein                                | 0           | 402484.01   | 0.0000 | 0.0126 | 5.3  | 681 | 2.2529E-46  |
| CN2/15751 | NADPH2:quinone reductase [EC:1.6.5.5]                                      | 31992.18    | 1308617.80  | 0.0029 | 0.0408 | 17.2 | 320 | 8.2474E-11  |
| CN2/15752 | carboxyl-terminal processing protease [EC:3.4.21.102]                      | 0           | 1564642.98  | 0.0000 | 0.0488 | 11.7 | 693 | 1.8461E-22  |
| CN2/15844 | biotin biosynthesis protein BioH                                           | 0           | 2724089.18  | 0.0000 | 0.0850 | 32   | 241 | 6.6231E-207 |
| CN2/1587  | aminotransferase [EC:2.6.1.-]                                              | 17135.58    | 1763103.82  | 0.0016 | 0.0550 | 16.6 | 403 | 1.0245E-67  |
| CN2/15914 | pyrroloquinoline-quinone synthase [EC:1.3.3.11]                            | 0           | 978982.47   | 0.0000 | 0.0305 | 54   | 63  | 3.9488E-07  |
| CN2/15987 | ATP-dependent protease La (EC 3.4.21.53) Type                              | 0           | 333423.74   | 0.0000 | 0.0104 | 7.5  | 560 | 3.4074E-14  |
| CN2/15990 | FKBP-type peptidyl-prolyl cis-trans isomerase FKLB [EC:5.2.1.8]            | 0           | 1348022.97  | 0.0000 | 0.0420 | 34.1 | 205 | 2.8932E-139 |
| CN2/1610  | elongation factor EF-P                                                     | 487165.19   | 14154952.94 | 0.0445 | 0.4415 | 48.9 | 188 | 9.248E-140  |
| CN2/16119 | Na <sup>+</sup> -transporting NADH:ubiquinone oxidoreductase subunit F     | 0           | 1762110.86  | 0.0000 | 0.0550 | 11.9 | 387 | 0.000079395 |
| CN2/16129 | lipid A 3-O-deacylase [EC:3.1.-.-]                                         | 11719.37    | 9642140.73  | 0.0011 | 0.3007 | 31.4 | 172 | 2.6663E-16  |
| CN2/16135 | Argininosuccinate lyase                                                    | 27251.95    | 3079187.27  | 0.0025 | 0.0960 | 34.8 | 626 | 3.7884E-153 |
| CN2/16136 | Unknown function                                                           | 112580.83   | 7195672.58  | 0.0103 | 0.2244 | 76.2 | 433 | 0           |
| CN2/16145 | peroxiredoxin (alkyl hydroperoxide reductase subunit C)                    | 55482.43    | 4717227.71  | 0.0051 | 0.1471 | 74.3 | 187 | 7.3615E-165 |
| CN2/16154 | hypothetical protein                                                       | 0           | 2076897.17  | 0.0000 | 0.0648 | 21.4 | 159 | 4.3449E-07  |
| CN2/16183 | Methyl-accepting chemotaxis protein                                        | 183821.65   | 937481.74   | 0.0168 | 0.0292 | 29.3 | 297 | 4.5525E-55  |
| CN2/16185 | Unknown function                                                           | 146455.05   | 14603270.94 | 0.0134 | 0.4555 | 46.4 | 321 | 2.0129E-265 |
| CN2/16206 | thiol:disulfide interchange protein DsbA                                   | 0           | 2586822.77  | 0.0000 | 0.0807 | 48.3 | 209 | 1.9503E-58  |
| CN2/16207 | Cytochrome c4                                                              | 85409.56    | 2023905.01  | 0.0078 | 0.0631 | 18   | 205 | 4.6888E-11  |
| CN2/16209 | glycine cleavage system H protein                                          | 0           | 12018776.55 | 0.0000 | 0.3749 | 15.7 | 127 | 8.4792E-06  |
| CN2/16229 | carboxyl-terminal processing protease [EC:3.4.21.102]                      | 0           | 4543983.08  | 0.0000 | 0.1417 | 17.8 | 445 | 4.1714E-59  |
| CN2/16246 | Outer membrane protein and related peptidoglycan-associated (lipo)proteins | 19764.40    | 585492.62   | 0.0018 | 0.0183 | 18.9 | 977 | 1.6519E-213 |
| CN2/16498 | large conductance mechanosensitive channel, Mscl family                    | 0           | 3884423.82  | 0.0000 | 0.1212 | 41.3 | 138 | 6.3829E-127 |
| CN2/16506 | TPR repeat containing exported protein                                     | 11358390.87 | 1504446.11  | 1.0385 | 0.0469 | 36   | 272 | 2.0417E-191 |
| CN2/16507 | peptidoglycan-associated lipoprotein                                       | 0           | 37010548.34 | 0.0000 | 1.1544 | 45.5 | 167 | 1.6526E-106 |
| CN2/16518 | starvation-inducible DNA-binding protein                                   | 0           | 13178643.91 | 0.0000 | 0.4111 | 54.5 | 156 | 4.0843E-105 |
| CN2/16522 | Outer membrane porin, OprD family                                          | 123143.39   | 24060158.35 | 0.0113 | 0.7505 | 63.4 | 421 | 0           |
| CN2/16571 | putative acyl-CoA dehydrogenase                                            | 18730.15    | 570782.15   | 0.0017 | 0.0178 | 27.7 | 548 | 1.7546E-43  |
| CN2/16737 | Unknown function                                                           | 0           | 1044783.24  | 0.0000 | 0.0326 | 12.6 | 183 | 1.5153E-06  |
| CN2/16772 | DNA gyrase subunit A [EC:5.99.1.3]                                         | 0           | 642887.72   | 0.0000 | 0.0201 | 8.7  | 935 | 1.1146E-68  |
| CN2/16833 | Unknown function                                                           | 0           | 1340292.37  | 0.0000 | 0.0418 | 31.9 | 248 | 1.1232E-81  |
| CN2/17000 | peptidyl-prolyl cis-trans isomerase B (cyclophilin B) [EC:5.2.1.8]         | 0           | 8717506.40  | 0.0000 | 0.2719 | 68.3 | 180 | 3.9648E-133 |
| CN2/17003 | Universal stress protein family 7                                          | 0           | 2804243.59  | 0.0000 | 0.0875 | 36.5 | 285 | 9.0154E-110 |
| CN2/17056 | peptidyl-prolyl cis-trans isomerase SurA [EC:5.2.1.8]                      | 140952.23   | 1660800.32  | 0.0129 | 0.0518 | 62.5 | 435 | 4.385E-273  |
| CN2/17080 | Unknown function                                                           | 15566.65    | 1712825.63  | 0.0014 | 0.0534 | 27.6 | 605 | 2.7642E-174 |
| CN2/17083 | 21 kDa hemolysin precursor                                                 | 0           | 1109402.97  | 0.0000 | 0.0346 | 28.8 | 191 | 2.7343E-73  |
| CN2/17107 | Unknown function                                                           | 17945.09    | 2844780.32  | 0.0016 | 0.0887 | 18   | 339 | 5.5602E-22  |
| CN2/17108 | LPS-assembly protein                                                       | 0           | 1393107.46  | 0.0000 | 0.0435 | 31   | 384 | 2.0207E-108 |
| CN2/17120 | 2-alkenal reductase [EC:1.3.1.74]                                          | 182818.40   | 3390284.71  | 0.0167 | 0.1057 | 34.8 | 469 | 4.7444E-80  |
| CN2/17122 | sigma-E factor negative regulatory protein RseB                            | 31754.19    | 1883869.37  | 0.0029 | 0.0588 | 26.8 | 310 | 3.8689E-27  |
| CN2/17170 | mitochondrial processing peptidase [EC:3.4.24.64]                          | 0           | 347547.60   | 0.0000 | 0.0108 | 16.9 | 503 | 3.4158E-44  |
| CN2/17408 | ATP-dependent Clp protease, protease subunit [EC:3.4.21.92]                | 0           | 10951794.12 | 0.0000 | 0.3416 | 70   | 90  | 5.1931E-36  |
| CN2/17440 | peptidyl-prolyl cis-trans isomerase A (cyclophilin A) [EC:5.2.1.8]         | 0           | 7337805.77  | 0.0000 | 0.2289 | 67.4 | 184 | 4.4589E-165 |
| CN2/17462 | S-adenosyl-methyltransferase [EC:2.1.1.-]                                  | 0           | 1030041.03  | 0.0000 | 0.0321 | 14   | 315 | 5.8631E-16  |

|           |                                                                                    |            |             |        |        |      |      |             |
|-----------|------------------------------------------------------------------------------------|------------|-------------|--------|--------|------|------|-------------|
| CN2/17493 | Unknown function                                                                   | 107509.90  | 839173.83   | 0.0098 | 0.0262 | 26.9 | 520  | 9.0687E-57  |
| CN2/17514 | OmpA-OmpF porin, OOP family                                                        | 128694.26  | 17981993.51 | 0.0118 | 0.5609 | 66.6 | 329  | 0           |
| CN2/17537 | Unknown function                                                                   | 654383.81  | 16013290.05 | 0.0598 | 0.4995 | 44.1 | 93   | 1.2143E-99  |
| CN2/17567 | iron complex outermembrane receptor protein                                        | 112456.60  | 1020434.74  | 0.0103 | 0.0318 | 43.2 | 621  | 0           |
| CN2/17613 | Uncharacterized protein involved in an early stage of isoprenoid biosynthesis      | 0          | 2747885.88  | 0.0000 | 0.0857 | 32.1 | 221  | 3.9224E-72  |
| CN2/17658 | lipoprotein-34                                                                     | 21035.53   | 2138759.82  | 0.0019 | 0.0667 | 51.2 | 365  | 4.7276E-56  |
| CN2/17677 | Unknown function                                                                   | 0          | 2091655.56  | 0.0000 | 0.0652 | 8.3  | 218  | 0.00093854  |
| CN2/17686 | Outer membrane protein A precursor                                                 | 0          | 3065529.09  | 0.0000 | 0.0956 | 46.9 | 245  | 2.3159E-14  |
| CN2/17687 | Signal transduction histidine kinase                                               | 0          | 384388.84   | 0.0000 | 0.0120 | 2.7  | 1058 | 0.011227    |
| CN2/17717 | 3-hydroxyacyl-CoA dehydrogenase (EC 1.1.1.35)                                      | 0          | 974071.00   | 0.0000 | 0.0304 | 22.6 | 412  | 1.7345E-37  |
| CN2/17879 | putative glutamine amidotransferase                                                | 0          | 2444294.19  | 0.0000 | 0.0762 | 34.7 | 248  | 9.7782E-80  |
| CN2/17900 | HlyD family secretion protein                                                      | 0          | 834199.35   | 0.0000 | 0.0260 | 10.3 | 358  | 3.5496E-06  |
| CN2/17902 | putative ABC transport system substrate-binding protein                            | 104421.43  | 1086979.51  | 0.0095 | 0.0339 | 26.3 | 312  | 5.3589E-55  |
| CN2/17912 | polar amino acid transport system substrate-binding protein                        | 149493.67  | 9825621.49  | 0.0137 | 0.3065 | 81.7 | 251  | 4.1354E-252 |
| CN2/17961 | thiol peroxidase, atypical 2-Cys peroxiredoxin [EC:1.11.1.15]                      | 0          | 13081306.68 | 0.0000 | 0.4080 | 60.2 | 166  | 8.8471E-224 |
| CN2/17991 | LPS-assembly lipoprotein                                                           | 22131.58   | 1066004.71  | 0.0020 | 0.0332 | 40.3 | 201  | 9.7684E-93  |
| CN2/18021 | thiosulfate sulfurtransferase [EC:2.8.1.1]                                         | 0          | 636381.47   | 0.0000 | 0.0198 | 31   | 271  | 2.2184E-13  |
| CN2/18182 | Predicted oxidoreductases (related to aryl-alcohol dehydrogenases)                 | 0          | 799101.33   | 0.0000 | 0.0249 | 38.3 | 269  | 2.1516E-56  |
| CN2/18183 | Glycerol-3-phosphate dehydrogenase                                                 | 0          | 2308220.17  | 0.0000 | 0.0720 | 18.7 | 390  | 1.2802E-15  |
| CN2/18212 | bacterioferritin                                                                   | 0          | 3125646.07  | 0.0000 | 0.0975 | 72.9 | 155  | 2.1391E-64  |
| CN2/18227 | AsmA protein                                                                       | 169955.61  | 1732677.50  | 0.0155 | 0.0540 | 42.7 | 740  | 6.4875E-275 |
| CN2/1838  | thioredoxin 2 [EC:1.8.1.8]                                                         | 0          | 1585110.57  | 0.0000 | 0.0494 | 43.8 | 144  | 9.229E-41   |
| CN2/2174  | hypothetical protein                                                               | 39081.58   | 2627784.65  | 0.0036 | 0.0820 | 41.8 | 225  | 3.2895E-39  |
| CN2/2288  | Unknown function                                                                   | 0          | 1925449.96  | 0.0000 | 0.0601 | 21.6 | 389  | 2.336E-26   |
| CN2/2291  | alkanal monooxygenase (FMN-linked) [EC:1.14.14.3]                                  | 0          | 1299689.33  | 0.0000 | 0.0405 | 48.3 | 331  | 1.0088E-51  |
| CN2/2292  | hypothetical protein                                                               | 0          | 7217821.84  | 0.0000 | 0.2251 | 38.1 | 105  | 9.3946E-21  |
| CN2/2298  | GST-like protein                                                                   | 60695.72   | 11589993.17 | 0.0055 | 0.3615 | 52.9 | 280  | 5.368E-292  |
| CN2/2911  | Valyl-tRNA synthetase                                                              | 0          | 1031213.50  | 0.0000 | 0.0322 | 32.7 | 223  | 2.3766E-29  |
| CN2/3584  | Protein Yic                                                                        | 218455.10  | 1308712.15  | 0.0200 | 0.0408 | 30.7 | 287  | 3.1816E-47  |
| CN2/3585  | ribonuclease PH [EC:2.7.7.56]                                                      | 0          | 5423855.93  | 0.0000 | 0.1692 | 21.7 | 240  | 5.2974E-34  |
| CN2/4442  | multiple sugar transport system substrate-binding protein                          | 106170.45  | 1069825.65  | 0.0097 | 0.0334 | 20.2 | 415  | 1.3377E-90  |
| CN2/5114  | hypothetical protein                                                               | 105308.22  | 744580.82   | 0.0096 | 0.0232 | 42.8 | 346  | 1.4244E-67  |
| CN2/5117  | Unknown function                                                                   | 41026.64   | 724670.63   | 0.0038 | 0.0226 | 36   | 236  | 8.5089E-94  |
| CN2/5132  | cytochrome c peroxidase [EC:1.11.1.5]                                              | 59616.24   | 3423809.37  | 0.0055 | 0.1068 | 36   | 464  | 3.2561E-179 |
| CN2/5239  | acyl carrier protein                                                               | 811525.51  | 35460358.62 | 0.0742 | 1.1060 | 32.1 | 78   | 3.0172E-51  |
| CN2/5738  | Enoyl-[acyl-carrier-protein] reductase [FMN] (EC 1.3.1.9)                          | 0          | 18220224.23 | 0.0000 | 0.5683 | 44.7 | 347  | 5.1944E-146 |
| CN2/7223  | protease I [EC:3.2.-.-]                                                            | 0          | 12124659.45 | 0.0000 | 0.3782 | 48.7 | 193  | 1.7484E-39  |
| CN2/7241  | Unknown function                                                                   | 0          | 1348437.60  | 0.0000 | 0.0421 | 8    | 698  | 2.8877E-26  |
| CN2/0264  | OmpA-OmpF porin, OOP family                                                        | 472805.95  | 40000641.97 | 0.0432 | 1.2477 | 61.3 | 142  | 4.4408E-242 |
| CN2/0835  | glycogen operon protein GlgX [EC:3.2.1.-]                                          | 1231414.88 | 1144748.84  | 0.1126 | 0.0357 | 18.7 | 717  | 1.4655E-32  |
| CN2/12279 | molecular chaperone DnaJ                                                           | 0          | 879851.78   | 0.0000 | 0.0274 | 14.4 | 375  | 1.7976E-40  |
| CN2/12850 | TRAP-type mannitol/chloroaromatic compound transport system, periplasmic component | 168032.53  | 16294287.92 | 0.0154 | 0.5082 | 77.6 | 98   | 1.706E-179  |
| CN2/13249 | cold shock protein (beta-ribbon, CspA family)                                      | 0          | 33270824.16 | 0.0000 | 1.0377 | 40   | 70   | 4.206E-07   |
| CN2/13319 | translation initiation factor IF-2                                                 | 0          | 2672424.01  | 0.0000 | 0.0834 | 8.5  | 831  | 1.1858E-154 |
| CN2/14339 | Uncharacterized protein conserved in bacteria                                      | 0          | 2878836.19  | 0.0000 | 0.0898 | 33.3 | 240  | 4.2545E-58  |
| CN2/15069 | elongation factor EF-Ts                                                            | 289130.96  | 8914916.95  | 0.0264 | 0.2781 | 70.7 | 287  | 0           |
| CN2/15328 | iron complex outermembrane receptor protein                                        | 0          | 3487200.84  | 0.0000 | 0.1088 | 20.4 | 457  | 1.299E-142  |
| CN2/16716 | Anaerobic dehydrogenases, typically selenocysteine-containing                      | 28858.25   | 1685035.09  | 0.0026 | 0.0526 | 38.1 | 544  | 1.1393E-109 |

|           |                                                                                           |            |             |        |        |      |     |             |
|-----------|-------------------------------------------------------------------------------------------|------------|-------------|--------|--------|------|-----|-------------|
| CN2/17057 | LPS-assembly protein                                                                      | 749180.46  | 3594574.52  | 0.0685 | 0.1121 | 36   | 514 | 2.8594E-108 |
| CN2/17618 | thioredoxin 1                                                                             | 0          | 11398517.96 | 0.0000 | 0.3555 | 27   | 137 | 4.3644E-29  |
| CN2/17638 | Unknown function                                                                          | 0          | 906360.61   | 0.0000 | 0.0283 | 16.9 | 496 | 1.7355E-61  |
| CN2/18040 | periplasmic glucans biosynthesis protein                                                  | 0          | 1310522.65  | 0.0000 | 0.0409 | 33.3 | 366 | 1.2892E-102 |
| CN2/2240  | osmotically inducible protein OsmC                                                        | 0          | 4073243.27  | 0.0000 | 0.1270 | 37.1 | 143 | 9.0132E-103 |
| CN2/0281  | ferredoxin--NADP+ reductase [EC:1.18.1.2]                                                 | 169179.02  | 1370599.60  | 0.0155 | 0.0428 | 46.5 | 258 | 5.7885E-136 |
| CN2/12083 | twitching motility protein PilT                                                           | 61250.58   | 408621.77   | 0.0056 | 0.0127 | 23.5 | 344 | 6.7428E-26  |
| CN2/17050 | serine protein kinase                                                                     | 0          | 2054950.05  | 0.0000 | 0.0641 | 28.3 | 640 | 1.5496E-108 |
| CN2/17407 | ATP-dependent Clp protease ATP-binding subunit ClpX                                       | 415803.99  | 931210.59   | 0.0380 | 0.0290 | 43.9 | 426 | 5.1554E-77  |
| CN2/18124 | ATP-dependent Clp protease ATP-binding subunit ClpB                                       | 53402.38   | 2831498.45  | 0.0049 | 0.0883 | 53   | 728 | 0           |
| CN1/8266  | Unknown function                                                                          | 6392606.61 | 0           | 0.5845 | 0.0000 | 39.1 | 197 | 3.2133E-122 |
| CN1/15566 | iron complex outermembrane receptor protein                                               | 840301.09  | 107300.63   | 0.0768 | 0.0033 | 16.3 | 619 | 9.491E-18   |
| CN1/24122 | multiple sugar transport system substrate-binding protein                                 | 3974650.30 | 401575.44   | 0.3634 | 0.0125 | 54.9 | 364 | 3.7509E-133 |
| CN1/0231  | Outer membrane protein/protective antigen OMA87                                           | 2051377.87 | 0           | 0.1876 | 0.0000 | 25   | 276 | 9.9649E-76  |
| CN1/0554  | 2-hydroxychromene-2-carboxylate isomerase                                                 | 453901.86  | 0           | 0.0415 | 0.0000 | 51.9 | 206 | 2.017E-52   |
| CN1/0936  | LPS-assembly protein                                                                      | 250123.06  | 0           | 0.0229 | 0.0000 | 7.3  | 648 | 3.5883E-06  |
| CN1/10146 | outer membrane protein                                                                    | 521346.60  | 51246.90    | 0.0477 | 0.0016 | 30.6 | 209 | 1.163E-26   |
| CN1/1049  | ABC-type transport system involved in resistance to organic solvents, auxiliary component | 730936.68  | 0           | 0.0668 | 0.0000 | 36.4 | 132 | 4.5867E-24  |
| CN1/10649 | starvation-inducible DNA-binding protein                                                  | 7320473.35 | 0           | 0.6693 | 0.0000 | 42.2 | 166 | 7.2014E-83  |
| CN1/11214 | putative thioredoxin                                                                      | 1349192.37 | 243319.19   | 0.1234 | 0.0076 | 27.5 | 316 | 5.919E-20   |
| CN1/11840 | Unknown function                                                                          | 2889432.20 | 0           | 0.2642 | 0.0000 | 20.6 | 170 | 2.4923E-07  |
| CN1/13415 | polar amino acid transport system substrate-binding protein                               | 2761870.80 | 163799.11   | 0.2525 | 0.0051 | 33.1 | 284 | 1.9952E-153 |
| CN1/1478  | solute:Na+ symporter, SSS family                                                          | 213099.72  | 0           | 0.0195 | 0.0000 | 8.3  | 363 | 2.6205E-17  |
| CN1/1887  | Periplasmic thiol:disulfide interchange protein Dsb                                       | 1037331.31 | 105759.74   | 0.0948 | 0.0033 | 15.9 | 220 | 3.074E-28   |
| CN1/1965  | DNA-binding protein HU-beta                                                               | 930643.80  | 0           | 0.0851 | 0.0000 | 32.2 | 90  | 0.00017931  |
| CN1/20855 | transcription elongation factor GreA                                                      | 4000823.59 | 0           | 0.3658 | 0.0000 | 19.7 | 137 | 0.000001193 |
| CN1/2103  | peptidoglycan-associated lipoprotein                                                      | 7316913.83 | 0           | 0.6690 | 0.0000 | 34.1 | 164 | 3.6465E-36  |
| CN1/2196  | Unknown function                                                                          | 442603.64  | 0           | 0.0405 | 0.0000 | 7.5  | 575 | 1.1968E-07  |
| CN1/2218  | peroxiredoxin (alkyl hydroperoxide reductase subunit C)                                   | 2514793.37 | 0           | 0.2299 | 0.0000 | 31.7 | 104 | 1.0879E-08  |
| CN1/2378  | outer membrane protein                                                                    | 1418055.65 | 0           | 0.1297 | 0.0000 | 20.2 | 535 | 8.6348E-38  |
| CN1/25231 | chaperonin GroES                                                                          | 9275254.25 | 0           | 0.8480 | 0.0000 | 39.6 | 96  | 2.9108E-70  |
| CN1/3522  | simple sugar transport system substrate-binding protein                                   | 588176.54  | 0           | 0.0538 | 0.0000 | 17.5 | 348 | 1.2496E-132 |
| CN1/5314  | basic membrane protein A and related proteins                                             | 3959616.08 | 0           | 0.3620 | 0.0000 | 10.1 | 335 | 2.2892E-12  |
| CN1/5616  | Unknown function                                                                          | 286381.06  | 0           | 0.0262 | 0.0000 | 14.6 | 521 | 1.4184E-13  |
| CN1/6969  | Uncharacterized protein conserved in bacteria                                             | 481061.18  | 0           | 0.0440 | 0.0000 | 20.9 | 211 | 0.000011592 |
| CN1/9997  | Unknown function                                                                          | 4212298.07 | 1010176.44  | 0.3851 | 0.0315 | 17.4 | 357 | 7.8037E-13  |
| CN1/22264 | ATP-dependent Clp protease, protease subunit [EC:3.4.21.92]                               | 812588.62  | 132190.13   | 0.0743 | 0.0041 | 16.8 | 208 | 6.2133E-09  |
| CN1/20701 | electron transfer flavoprotein alpha subunit                                              | 1391430.45 | 31091.71    | 0.1272 | 0.0010 | 29.5 | 129 | 1.2023E-09  |
| CN1/0115  | putative ABC transport system substrate-binding protein                                   | 0.00       | 0           | 0.0000 | 0.0000 | 40.1 | 272 | 1.1521E-47  |
| CN1/16960 | polar amino acid transport system substrate-binding protein                               | 415293.75  | 0           | 0.0380 | 0.0000 | 13   | 216 | 1.9437E-07  |
| CN1/23563 | Unknown function                                                                          | 380270.44  | 0           | 0.0348 | 0.0000 | 23.7 | 295 | 9.4439E-24  |
| CN1/6723  | Unknown function                                                                          | 1257365.42 | 0           | 0.1150 | 0.0000 | 31.3 | 83  | 0.000083739 |

<sup>1</sup>The metaproteomes of CN1 and CN2 were investigated via 1-dimensional (1-DE) gel-based pre-separation of proteins and subsequent tryptic digestion and fractionation and identification of the resulting peptides by a nano-UPLC system coupled to an LTQ-Orbitrap mass spectrometer using the DNA metagenome sequences as templates. Following criteria established in **Supplementary Materials and Methods** proteins were unambiguously identified using the annotation pipeline. Theoretical amino acid protein length (based on data provided in the annotation pipeline) and the coverage of identified peptides within the entire protein sequence are specifically shown. Full details are given in **Supplementary Materials and Methods**.

<sup>2</sup>Normalized *per protein* intensities were calculated as average of *per peptide* intensities in replicas. These *per peptide* intensities were summed and relative concentration of individual proteins calculated by dividing *per protein* intensities and the averages of the *summed* intensities.

<sup>3</sup>PEP is defined as the Posterior Error Probability of the identification. This value essentially operates as a *p*-value.

**Table S7** Proteins of CN1 and CN2 communities identified and quantified by metaproteomic approaches putatively involved in the naphthalene degradation pathway. Protein annotation and tentative phylogenetic affiliations are specifically shown. For statistical significance and content description (including footnotes) see **Tables S5** and **S6**.

| List of unique proteins | Protein (ORFs) | Best hit                                                 | Tentative phylogenetic affiliation and presumptive plasmid/genome location | Annotation                                    | Rel. conc. CN1 (%) | Rel. conc. CN2 (%) |
|-------------------------|----------------|----------------------------------------------------------|----------------------------------------------------------------------------|-----------------------------------------------|--------------------|--------------------|
| 1                       | CN1/10034      | 99% <i>Ralstonia</i> sp. U2 (AAD12610)                   | <i>Betaproteobacteria</i> ( <i>Achromobacter</i> )                         | Naphthalene dioxygenase (alpha)               | 1.7436             | 0.3546             |
|                         | CN1/21052      | 89% <i>Ralstonia</i> sp. U2 (AP12611)                    |                                                                            | Naphthalene dioxygenase (beta)                | 1.8884             | 0.4876             |
|                         | CN2/8666       | 95% NagAc <i>Ralstonia</i> sp. U2 (AAD12610)             |                                                                            | Naphthalene dioxygenase (alpha)               | 0.0063             | 0.1100             |
|                         | CN2/15794      | 97% NagAc <i>Ralstonia</i> sp. U2 (AAD12610)             |                                                                            | Naphthalene dioxygenase (alpha)               | 0.5228             | 0.0721             |
| 2                       | CN1/14978      | 100% <i>Ralstonia</i> sp. U2 (AP12614)                   | <i>Betaproteobacteria</i> ( <i>Achromobacter</i> )                         | Dihydroxynaphthalene dioxygenase              | 2.1339             | 0.4816             |
|                         | CN2/8417       | 93% <i>Ralstonia</i> sp. U2 (AAD12614)                   |                                                                            | Dihydroxynaphthalene dioxygenase              | 0.5554             | 0.1127             |
| 3                       | CN2/17233      | 94% <i>Ralstonia</i> sp. U2 (AAD12612)                   | <i>Betaproteobacteria</i> ( <i>Achromobacter</i> )                         | Naphthalene dihydrodiol dehydrogenase         | 0.0247             | 0.0984             |
| 4                       | CN1/24001      | 100% <i>Ralstonia</i> sp. U2 (AAD12617)                  | <i>Betaproteobacteria</i> ( <i>Achromobacter</i> )                         | 2-Hydroxychromene-2-carboxylate isomerase     | 0.5107             | 0.1396             |
| 5                       | CN1/23998      | 99% <i>Ralstonia</i> sp. U2 (AAD12166)                   | <i>Betaproteobacteria</i> ( <i>Achromobacter</i> )                         | Hydroxybenzylidenepyruvate hydratase-aldolase | 0.0577             | 0.0151             |
| 6                       | CN1/14979      | 98% <i>Ralstonia</i> sp. U2 (AAD12613)                   | <i>Betaproteobacteria</i> ( <i>Achromobacter</i> )                         | Salicylaldehyde dehydrogenase                 | 0.7457             | 1.7291             |
| 7                       | CN1/24000      | 100% <i>Ralstonia</i> sp. U2 (AAD12618)                  | <i>Betaproteobacteria</i> ( <i>Achromobacter</i> )                         | Glutathione S transferase (NagJ-like)         | 0.2015             | 0.1110             |
| 8                       | CN1/6354       | 100% <i>Ralstonia</i> sp. U2 (AAD12619)                  | <i>Betaproteobacteria</i> ( <i>Achromobacter</i> )                         | Gentisate dioxygenase                         | 1.9205             | 0.3978             |
|                         | CN1/23999      | 100% <i>Ralstonia</i> sp. U2 (AAD12619)                  |                                                                            | Gentisate dioxygenase                         | 2.0062             | 0.4507             |
| 9                       | CN2/3389       | 82% <i>Leptothrix cholodnii</i> SP-6 Lcho3671 (ACB35925) | <i>Betaproteobacteria</i> (genus unclear)                                  | Fumarylpyruvate hydrolase                     | 0.5060             | 0.0000             |
| 10                      | CN1/20819      | 83% <i>Polaromonas</i> sp. JS666 (Bpro_0983)             | <i>Betaproteobacteria</i> ( <i>Achromobacter</i> )                         | Salicylate 5-hydroxylase                      | 0.0000             | 0.0248             |
| 11                      | CN2/11945      | 99% NahAd <i>Pseudomonas</i> sp. ND6 (NP_943189) and 78% | <i>Gammaproteobacteria</i> ( <i>Pseudomonas</i> )                          | Naphthalene dioxygenase (beta)                | 0.0224             | 1.0212             |

|    |           |                                                                                             |                                                   |                                               |        |        |
|----|-----------|---------------------------------------------------------------------------------------------|---------------------------------------------------|-----------------------------------------------|--------|--------|
|    |           | <i>Ralstonia</i> sp. U2 (AAD12611)                                                          |                                                   |                                               |        |        |
|    | CN2/11946 | 99% NahAc <i>Pseudomonas</i> sp. ND6 (NP_943188) and 89% <i>Ralstonia</i> sp. U2 (AAD12610) |                                                   | Naphthalene dioxygenase (alpha)               | 0.0981 | 0.5599 |
|    | CN2/11948 | NahAa 99% <i>Pseudomonas</i> sp. ND6 (NP_943186) and 67% <i>Ralstonia</i> sp. U2 (AAD12606) |                                                   | Naphthalene dioxygenase (reductase)           | 0.0550 | 0.0978 |
| 12 | CN2/11942 | 100% NahC <i>Pseudomonas</i> sp. ND6 (NP_943192) and 88% <i>Ralstonia</i> sp. U2 (AAD12614) | <i>Gammaproteobacteria</i> ( <i>Pseudomonas</i> ) | Dihydroxynaphthalene dioxygenase              | 0.1129 | 0.7332 |
| 13 | CN2/11944 | 99% NahB <i>Pseudomonas</i> sp. ND6 (NP_943190) and 85% <i>Ralstonia</i> sp. U2 (AAD12612)  | <i>Gammaproteobacteria</i> ( <i>Pseudomonas</i> ) | Naphthalene dihydrodiol dehydrogenase         | 0.0130 | 0.7907 |
| 14 | CN2/11940 | 100% NahE <i>Pseudomonas</i> sp. ND6 (NP_943093) and 89% <i>Ralstonia</i> sp. U2 (AAD12616) | <i>Gammaproteobacteria</i> ( <i>Pseudomonas</i> ) | Hydroxybenzylidenepyruvate hydratase-aldolase | 0.0221 | 0.4242 |
| 15 | CN2/11943 | 100% NahF <i>Pseudomonas</i> sp. ND6 (NP_943191) and 89% <i>Ralstonia</i> sp. U2 (AAD12613) | <i>Gammaproteobacteria</i> ( <i>Pseudomonas</i> ) | Salicylaldehyde dehydrogenase                 | 0.2739 | 0.9920 |
| 16 | CN2/16710 | 100% <i>Pseudomonas putida</i> AK5 (ACO92378)                                               | <i>Gammaproteobacteria</i> ( <i>Pseudomonas</i> ) | Salicylate 5-hydroxylase                      | 0.0023 | 0.4404 |
|    | CN2/16711 | 100% <i>Pseudomonas putida</i> AK5 (ACO92377)                                               |                                                   | Salicylate 5-hydroxylase                      | 0.0074 | 0.2445 |
| 17 | CN2/16713 | 100% <i>Pseudomonas putida</i> AK5 (ACO92375)                                               | <i>Gammaproteobacteria</i> ( <i>Pseudomonas</i> ) | Gentisate dioxygenase                         | 0.0120 | 0.6514 |
| 18 | CN2/16708 | 100% <i>Pseudomonas putida</i> AK5 (ACO92383)                                               | <i>Gammaproteobacteria</i> ( <i>Pseudomonas</i> ) | Fumarylpyruvate hydrolase                     | 0.0037 | 0.2162 |
| 19 | CN2/16712 | 100% <i>Pseudomonas putida</i> AK5 (ACO92376)                                               | <i>Gammaproteobacteria</i> ( <i>Pseudomonas</i> ) | Fumarylpyruvate hydrolase                     | 0.1889 | 0.5318 |
| 20 | CN2/17371 | 100% NahH <i>Pseudomonas</i> sp. ND6 (AAP44220)                                             | <i>Gammaproteobacteria</i> ( <i>Pseudomonas</i> ) | Catechol 2,3-dioxygenase                      | 0.0000 | 0.0698 |
| 21 | CN2/8952  | 100% NahL <i>Pseudomonas putida</i> GJ31 (AAX38568)                                         | <i>Gammaproteobacteria</i> ( <i>Pseudomonas</i> ) | 2-Oxopent-4-enoate hydratase                  | 0.0000 | 0.0966 |
| 22 | CN2/17367 | 100% NahM <i>Pseudomonas</i> sp. ND6 (AAP44215)                                             | <i>Gammaproteobacteria</i> ( <i>Pseudomonas</i> ) | 4-Hydroxy-2-oxovalerate aldolase              | 0.0027 | 0.5603 |
| 23 | CN2/17368 | 100% NahO <i>Pseudomonas</i> sp. ND6 (AAP44216)                                             | <i>Gammaproteobacteria</i> ( <i>Pseudomonas</i> ) | Acetaldehyde dehydrogenase                    | 0.0082 | 0.2935 |
| 24 | CN2/11941 | 98% NahQ <i>Pseudomonas</i> sp. ND6 (AAP44191) and 76% <i>Ralstonia</i> sp. U2 (AAD12615)   | <i>Gammaproteobacteria</i> ( <i>Pseudomonas</i> ) | Membrane protein                              | 0.0000 | 1.5654 |

|    |          |                                                               |                                                       |                                           |        |        |
|----|----------|---------------------------------------------------------------|-------------------------------------------------------|-------------------------------------------|--------|--------|
| 25 | CN1/0554 | 89% NahD <i>Azospirillum</i> B510<br>Azl004590 (YP_003447641) | <i>Alphaproteobacteria</i><br>( <i>Azospirillum</i> ) | 2-Hydroxychromene-2-carboxylate isomerase | 0.0415 | 0.0000 |
| 26 | CN1/3872 | 53% <i>Ralstonia</i> sp. U2<br>(AAD12619)                     | <i>Alphaproteobacteria</i><br>( <i>Azospirillum</i> ) | Gentisate dioxygenase                     | 0.3299 | 0.0000 |



**Table S8** In-house database containing sequences of enzymes known to be involved in the aerobic metabolism of aromatics via di- and trihydroxylated intermediates. The Table is provided as Excel document as separate file.

**Table S9** Complete information regarding gene prediction and annotation of metagenome sequences herein obtained. Full description of methods used for gene annotation is provided in **Supplementary Materials and Methods**. The Table is provided as Excel document as separate file.

## SUPPORTING FIGURE LEGENDS

**Figure S1** Features and location of the PAH-contaminated soil. This soil was affected by different PAH spills for decades by a chemical plant (see text for details). The area of the initial site remediation study covers about 25.000 m<sup>2</sup>, and the samples N and Nbs were taken as a composite and representative sample of the central area. This parcel was included in the "National inventory of contaminated soils" in the region of Asturias (Spain) in May 2001.

**Figure S2** GC-MS total ion chromatogram of the sample N used in the present study. Major pollutants are indicated, namely 1 (indene), N (naphthalene), MN (methylnaphthalenes), 2 (alkanes), 3 (phenanthrene), 4 (phtalates and fatty acids) and 5 (non identified nitrogen-containing heterocycles). Note: it was not possible to obtain actually (and neither in the past) unpolluted same type of soil given the edaphic and hydric conditions in the area and the extension of contamination; therefore, we have developed a detailed forensic study of the site (not included in this work) that includes the following conclusions. First, PAHs (predominant contaminants at this site) are linked to former activities of coal tar processing. Second, the presence of alkanes is related to former fuel and gasoil spills from the heating systems of the factory. Third, fatty acids were identified in coherence with the former storage of 'Tinol', a residue from steel plants, composed of a mixture of animal fats, mineral lubricants and chips. Fourth, phtalates are usually associated with the manipulation of samples, although in our case the important signals found are clearly linked to one of the main activities of the factory (resin manufacture). Fifth, the N heterocycles found in the samples are derived of the use of these products in other minority processes carried out in the factory (chemical products manufacturing). As a conclusion it is possible that traces of some of these contaminants had a natural origin or were attributable to the manipulation of samples; however, in our case chemical, physical and even "historical" evidences justify the classification of the indicated peaks in the chromatogram as pollutants.

**Figure S3** DGGE fingerprints of PCR-amplified 16S rDNA gene fragments from contaminated soil (N), contaminated soil after 231 days of biostimulation (Nbs) and enrichment cultures (CN1, CN2) after four different transfers. 1: CN1 Transfer 20; 2: CN1 Transfer 35; 3: CN1 Transfer 45; 4: CN1 Transfer 62.5; 5: CN2 Transfer 20; 6: CN2 Transfer 35; 7: CN2 Transfer 45;

8:CN2 Transfer 60; 9: Contaminated soil (N); 10: Biostimulated soil after 231 days of treatment. DGGE fingerprints after transfer 62 for CN1 and transfer 60 for CN2 were equally the same and are not shown. Gels were stained with SYBR Gold, and visualized by UV-fluorescence. Major bands excised and sequenced are indicated: A, *Flavobacterium ferrugineum*; B, Endosymbiont of *Achantomaeba*; C, *Acidovorax* sp.; D, *Achromobacter piechaudii*; E, *Microbacterium*; F, *Pseudomonas stutzeri*.

**Figure S4** Rarefaction curves for the bacterial 16S rDNA gene sequences. The curves were plotted as Operational Phylogenetic Units (OPUs) at 97% sequence similarity versus the number of 16S rDNA sequences. For Nbs, both almost complete cloned 16S rDNA gene sequences and 16S rDNA gene partial sequences obtained in the metagenome survey, were considered.

**Figures S5 and S6** Neighbor-joining tree of proteobacterial (**S5**), and other (**S6**) 16S rDNA gene from N, Nbs, CN1 and CN2 communities this figure corresponds to Figures 1, 2 and 3, but in this case showing the internal topology of each OPU. As shown in the tree a large fraction of sequences affiliated with known families and clustered with branches represented by cultured microorganisms, typical inhabiting (non) contaminated environments, and thus they do not appear to be specific for the soil and enrichment samples herein investigated; however, a number of sequences were closely related to uncultured microorganisms mostly recovered from non contaminated soils (DQ256350 related to *Alkanindigenes*) as well as hydrocarbon contaminated soils (DQ297946 related to *Novosphingobium*), soils containing natural asphalts (EF157271 related to *Luteolibacter*), soil wastes from oil-shale chemical industry (EF540436 related to *Rhodobacteraceae*), wastewater digesters (EU104101 and FJ535514) and waters of petroleum reservoirs (AY570578 related to *Arcobacter* and AY570579) and mines (DQ469227 related to *Alcaligenaceae*) and chloroaromatic consortia (DQ286556 related to *Azospirillum*), to cite some.

**Figure S7** Contigs length distribution of N, Nbs, CN1 and CN2 metagenomes. Graph represents the number of contigs with length  $\leq$  5000 bp (A), 5000-10000 bp (B), 10200-15000 (C) and 15200-25000 (D).

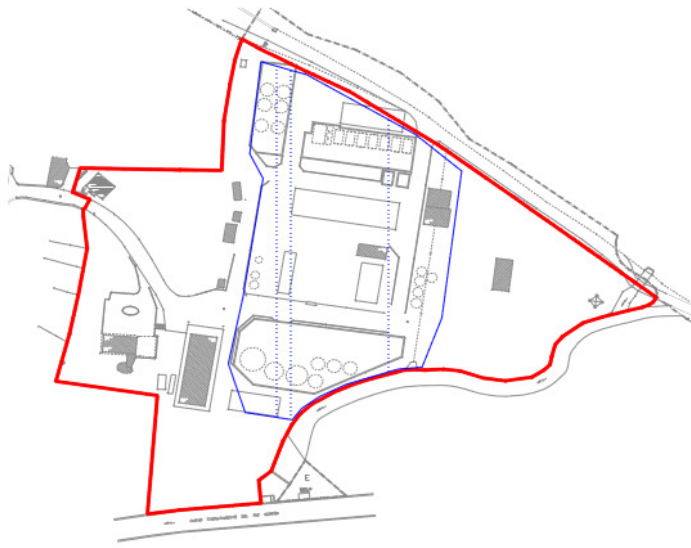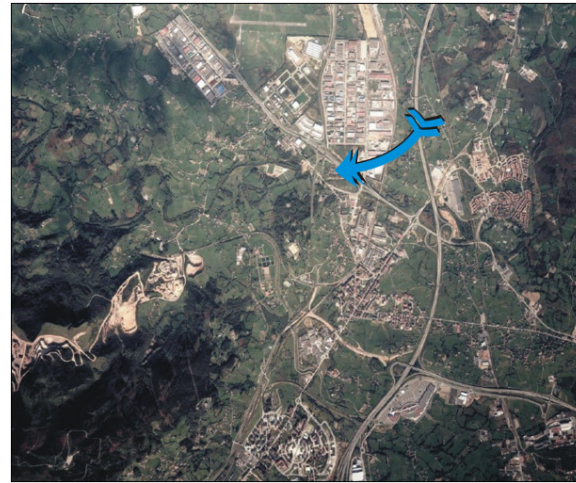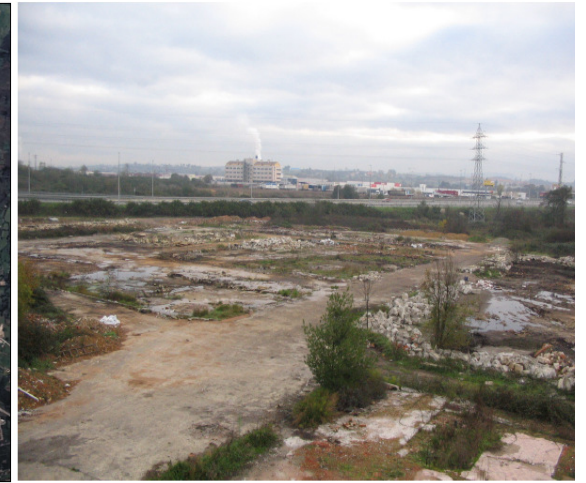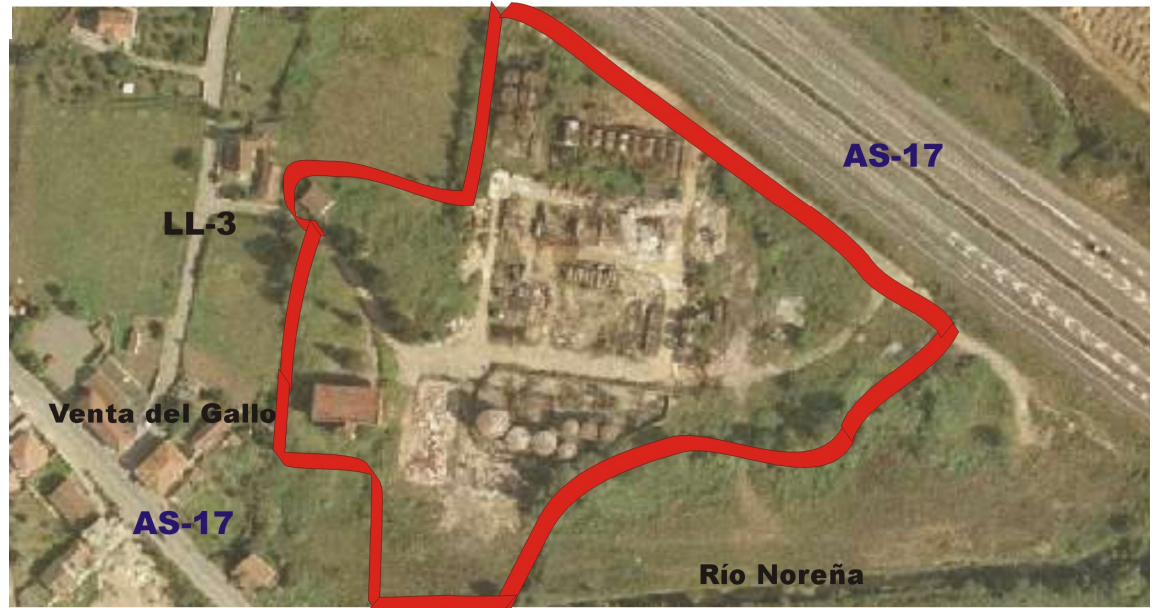

Figure S1

Abundance

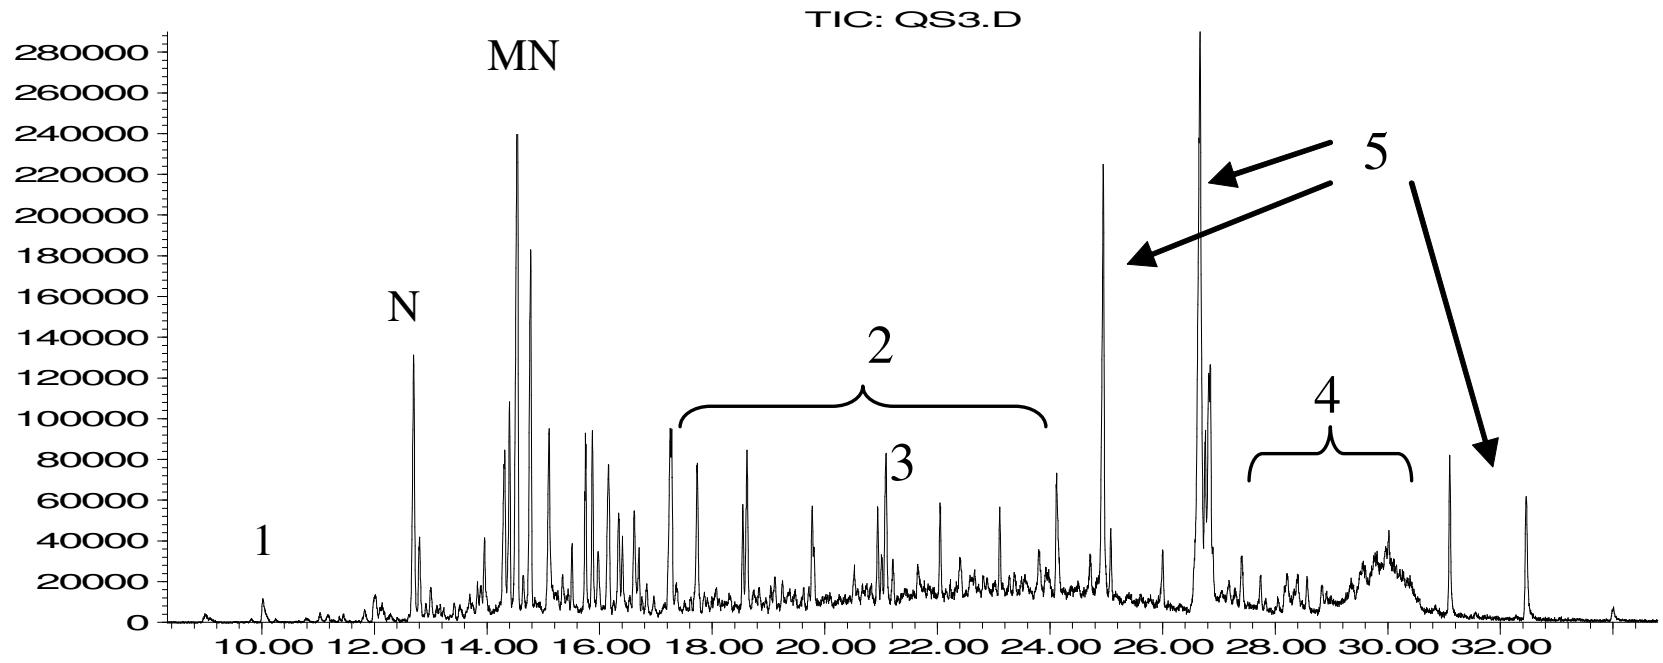

Time-->

Figure S2

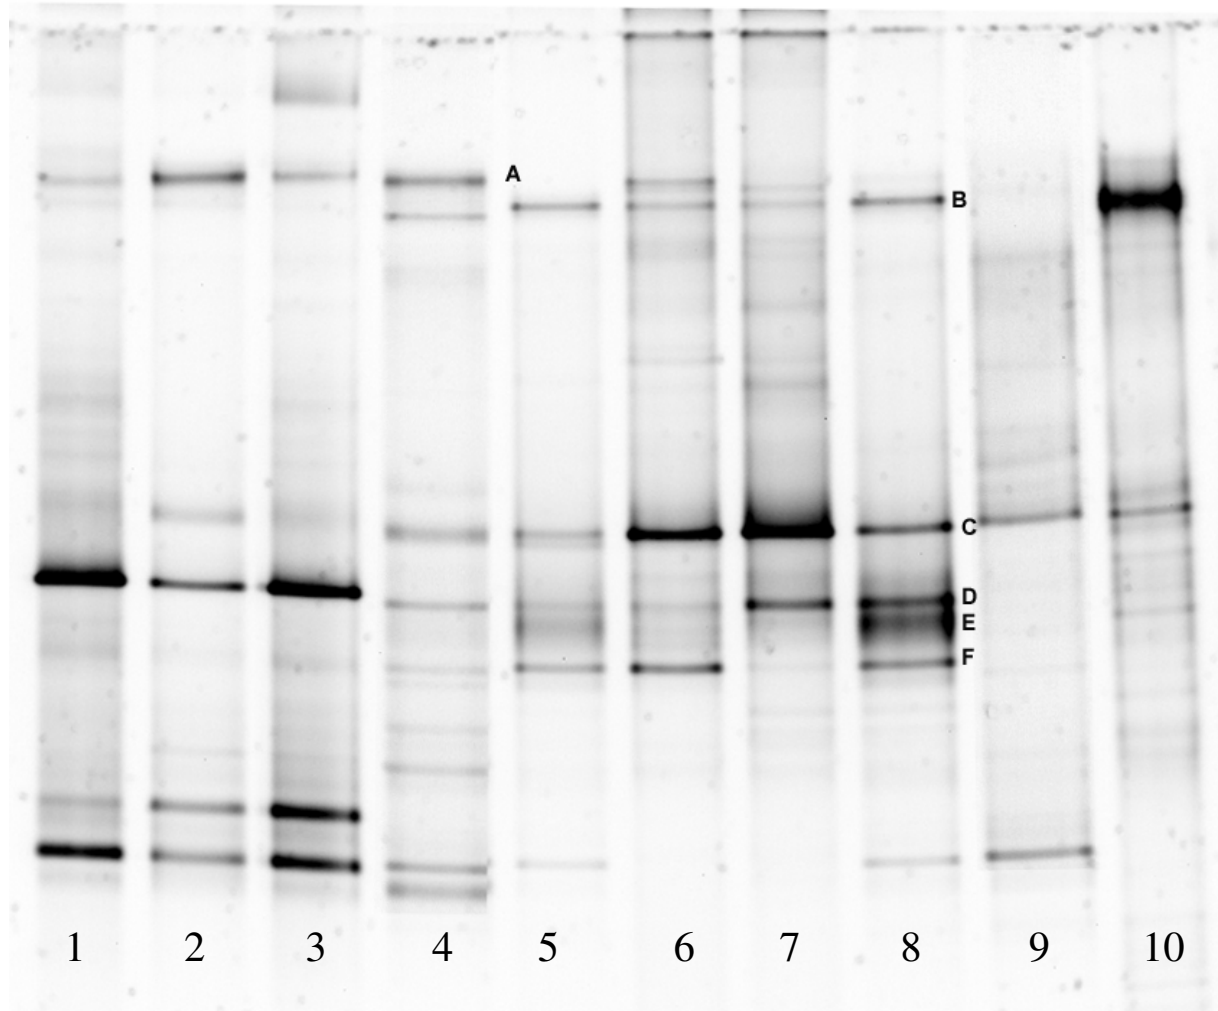

Figure S3

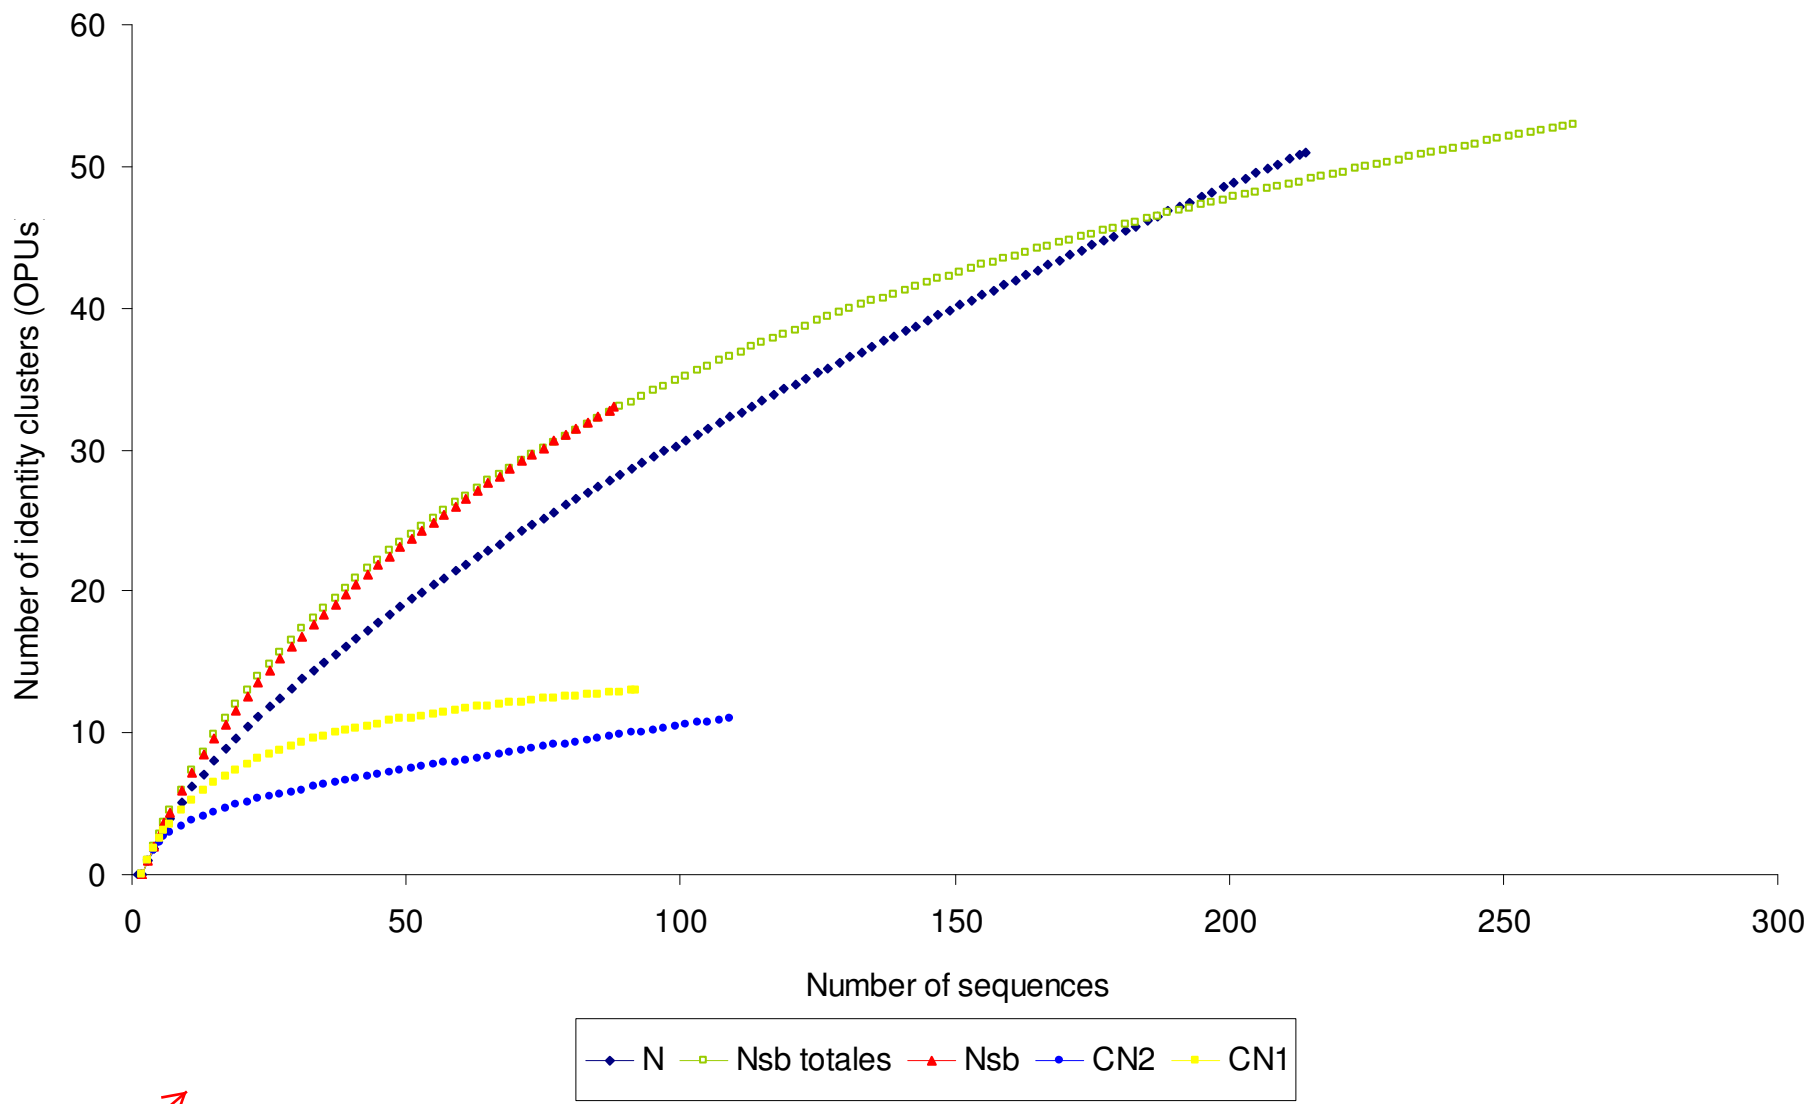

Figure S4

Figure S5

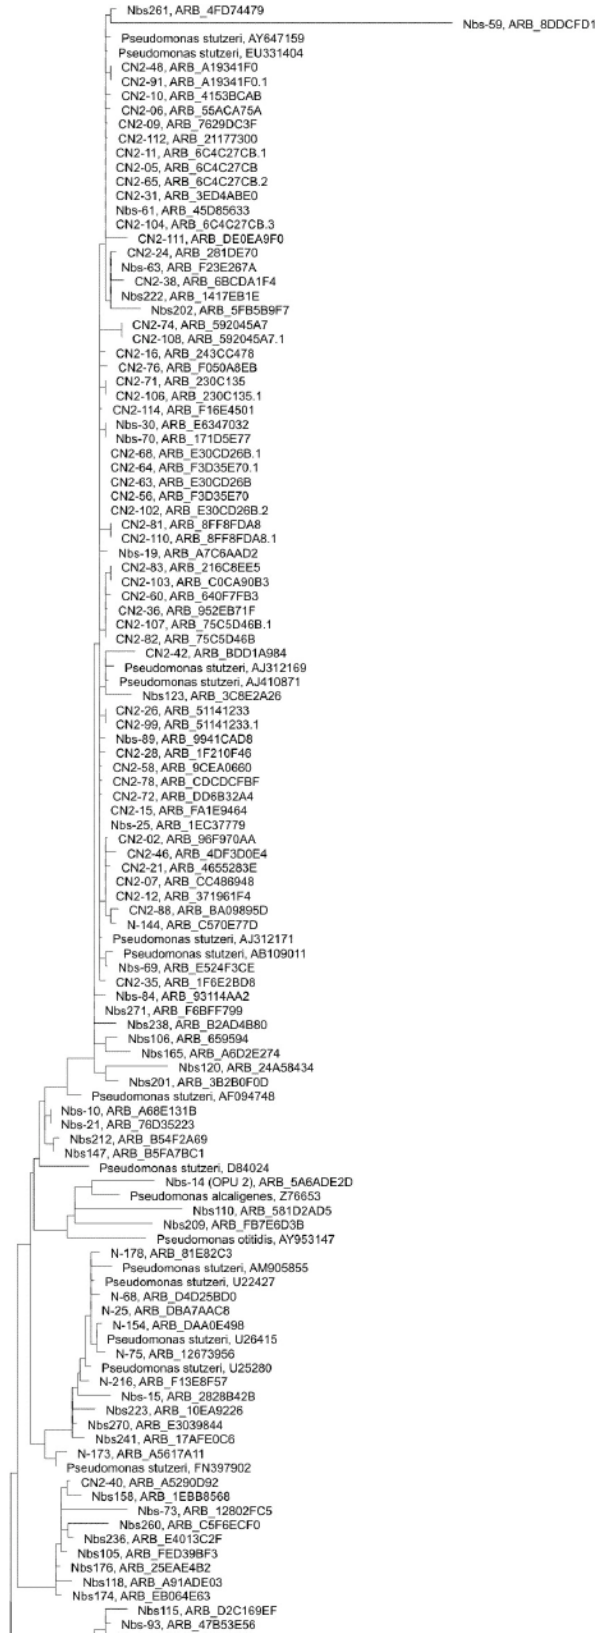





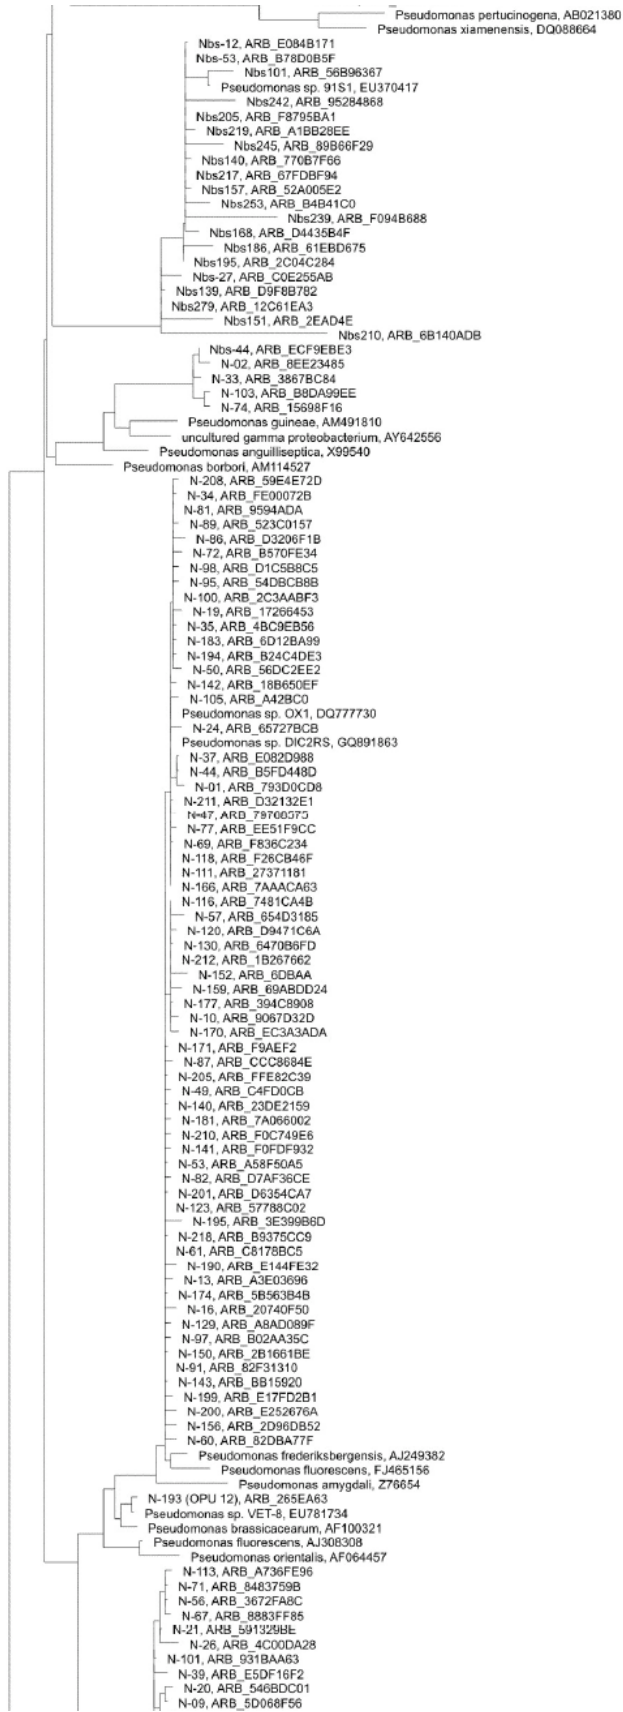

Figure S5 cont. (3)

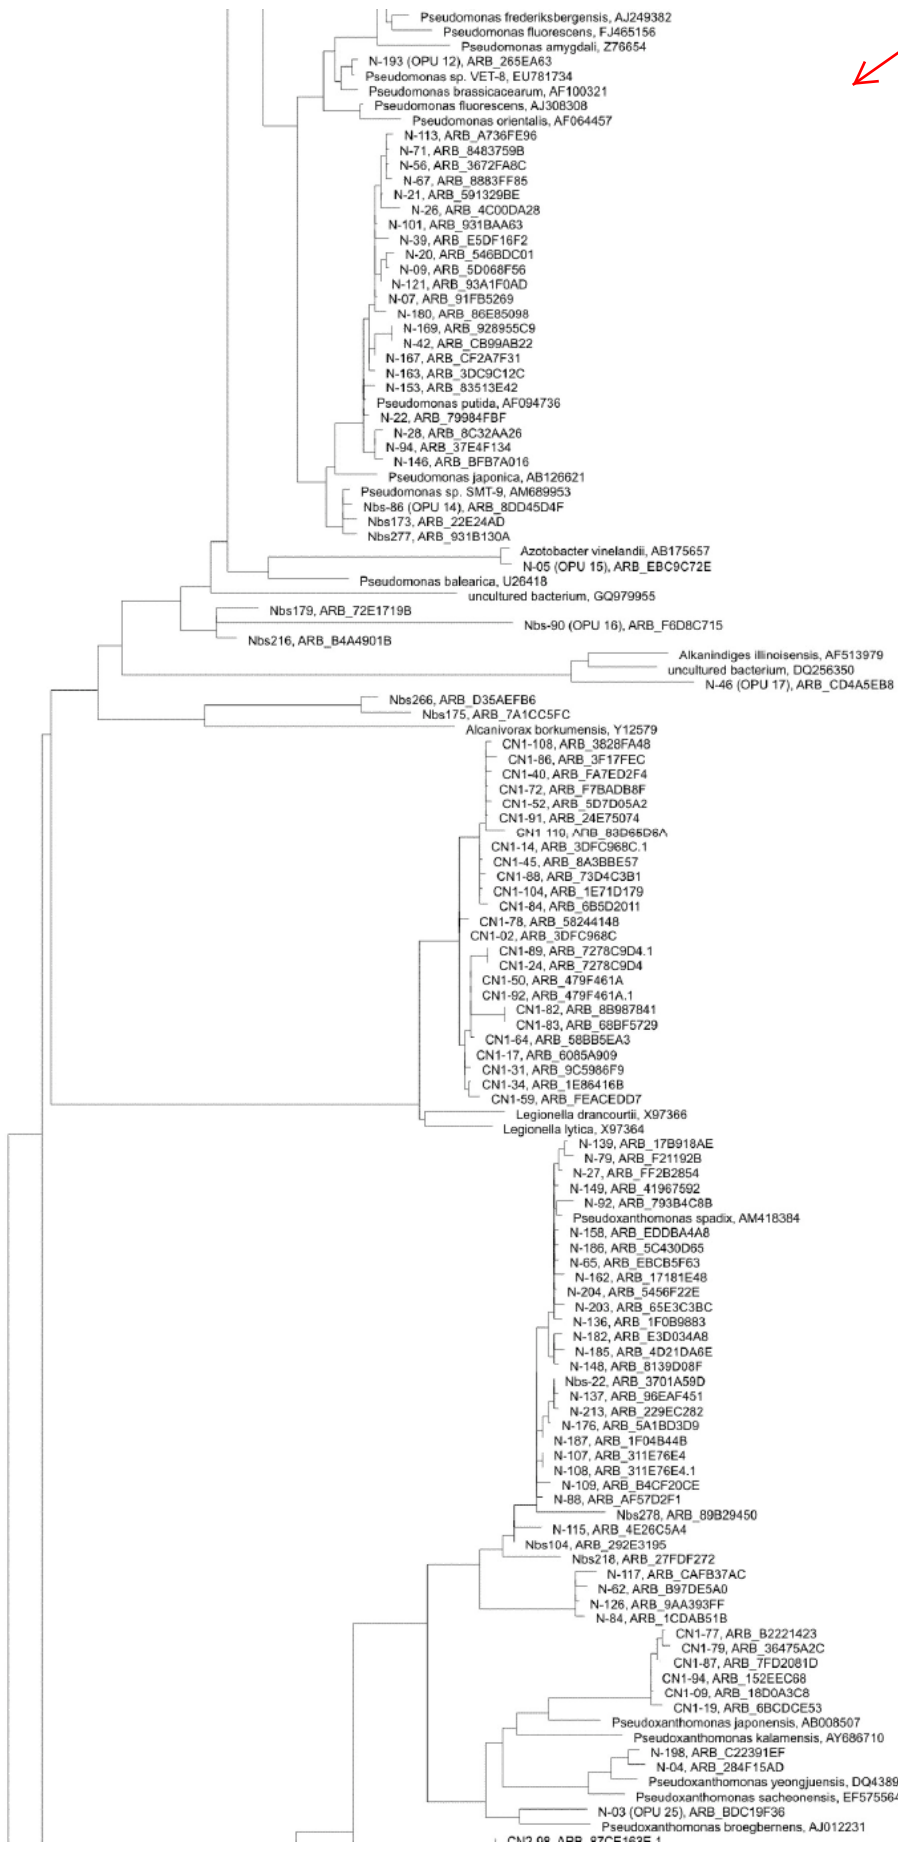

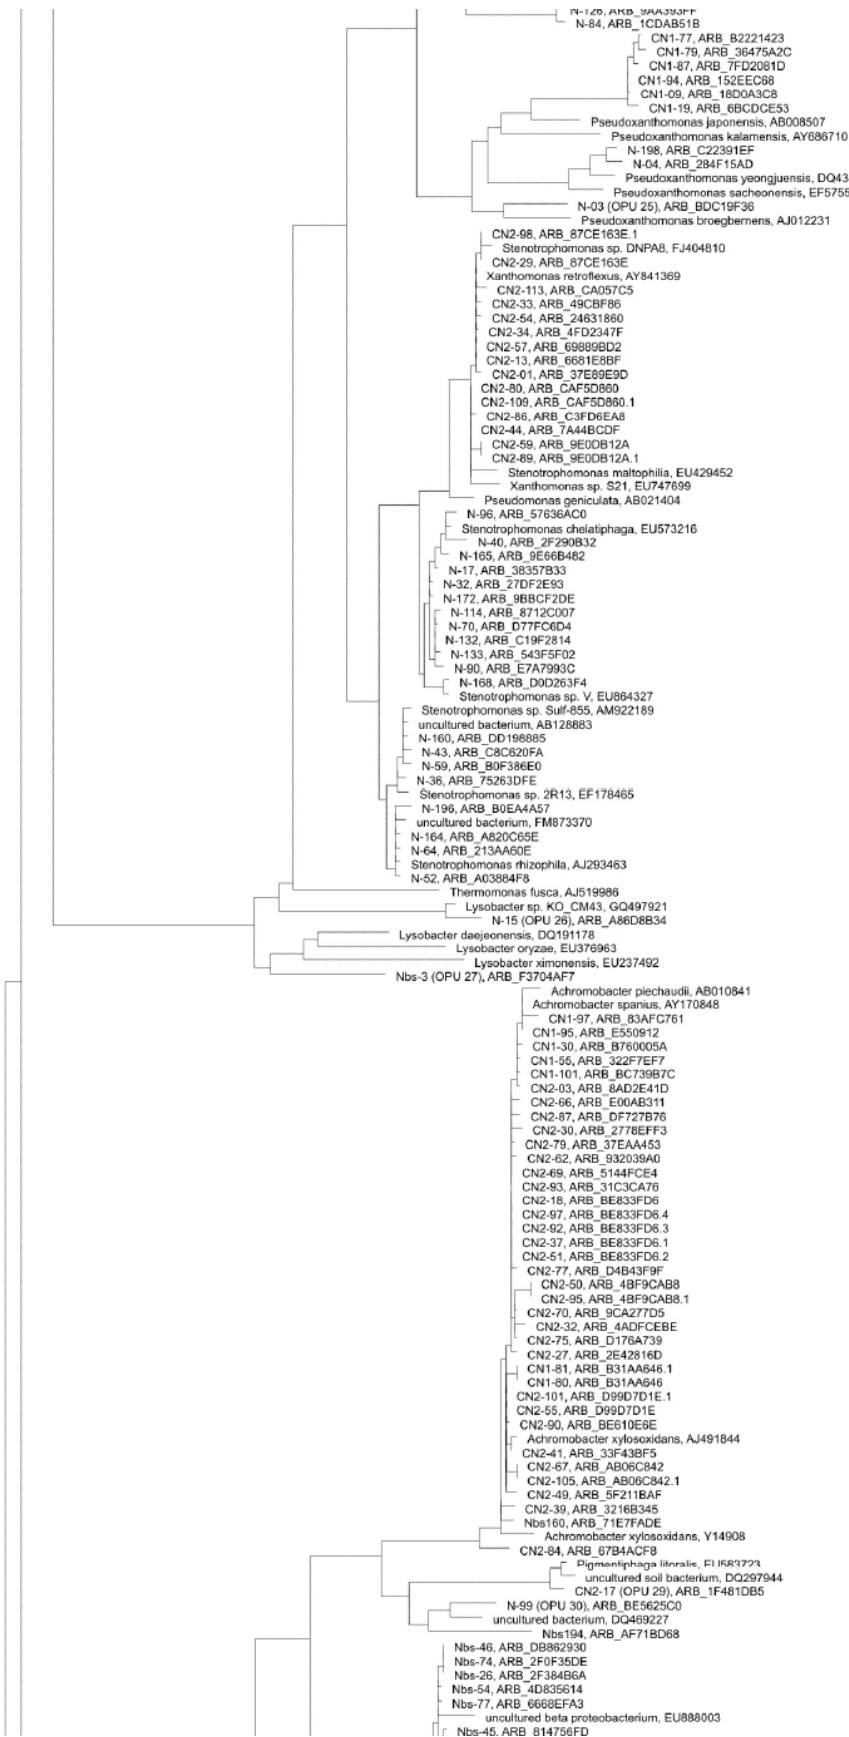

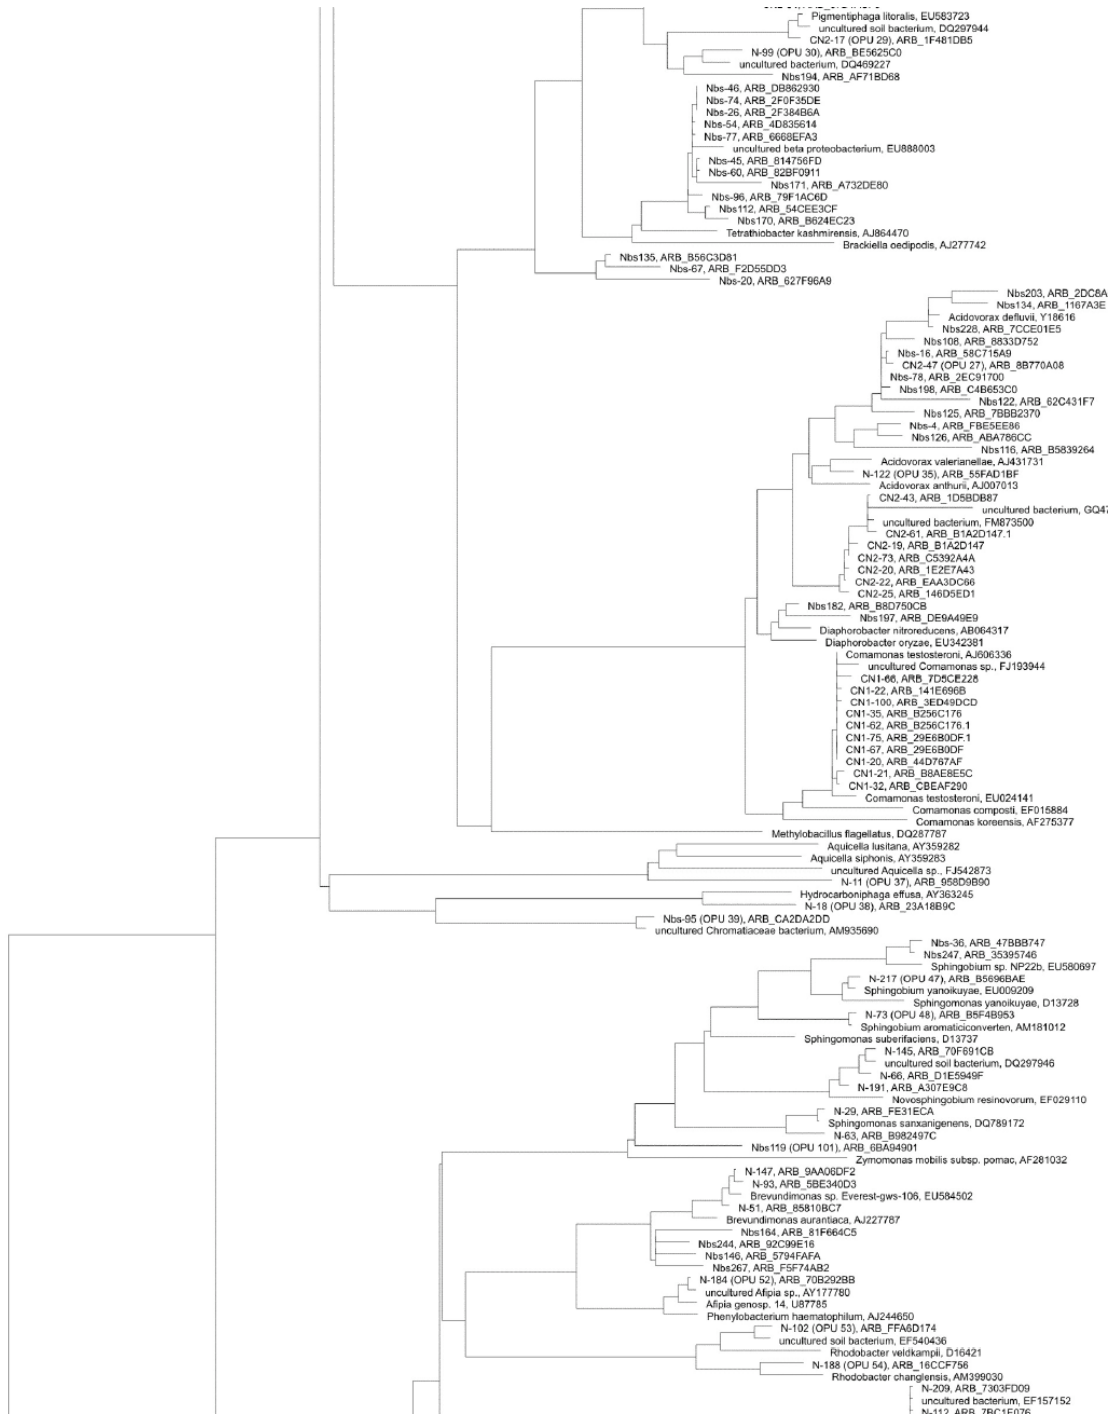

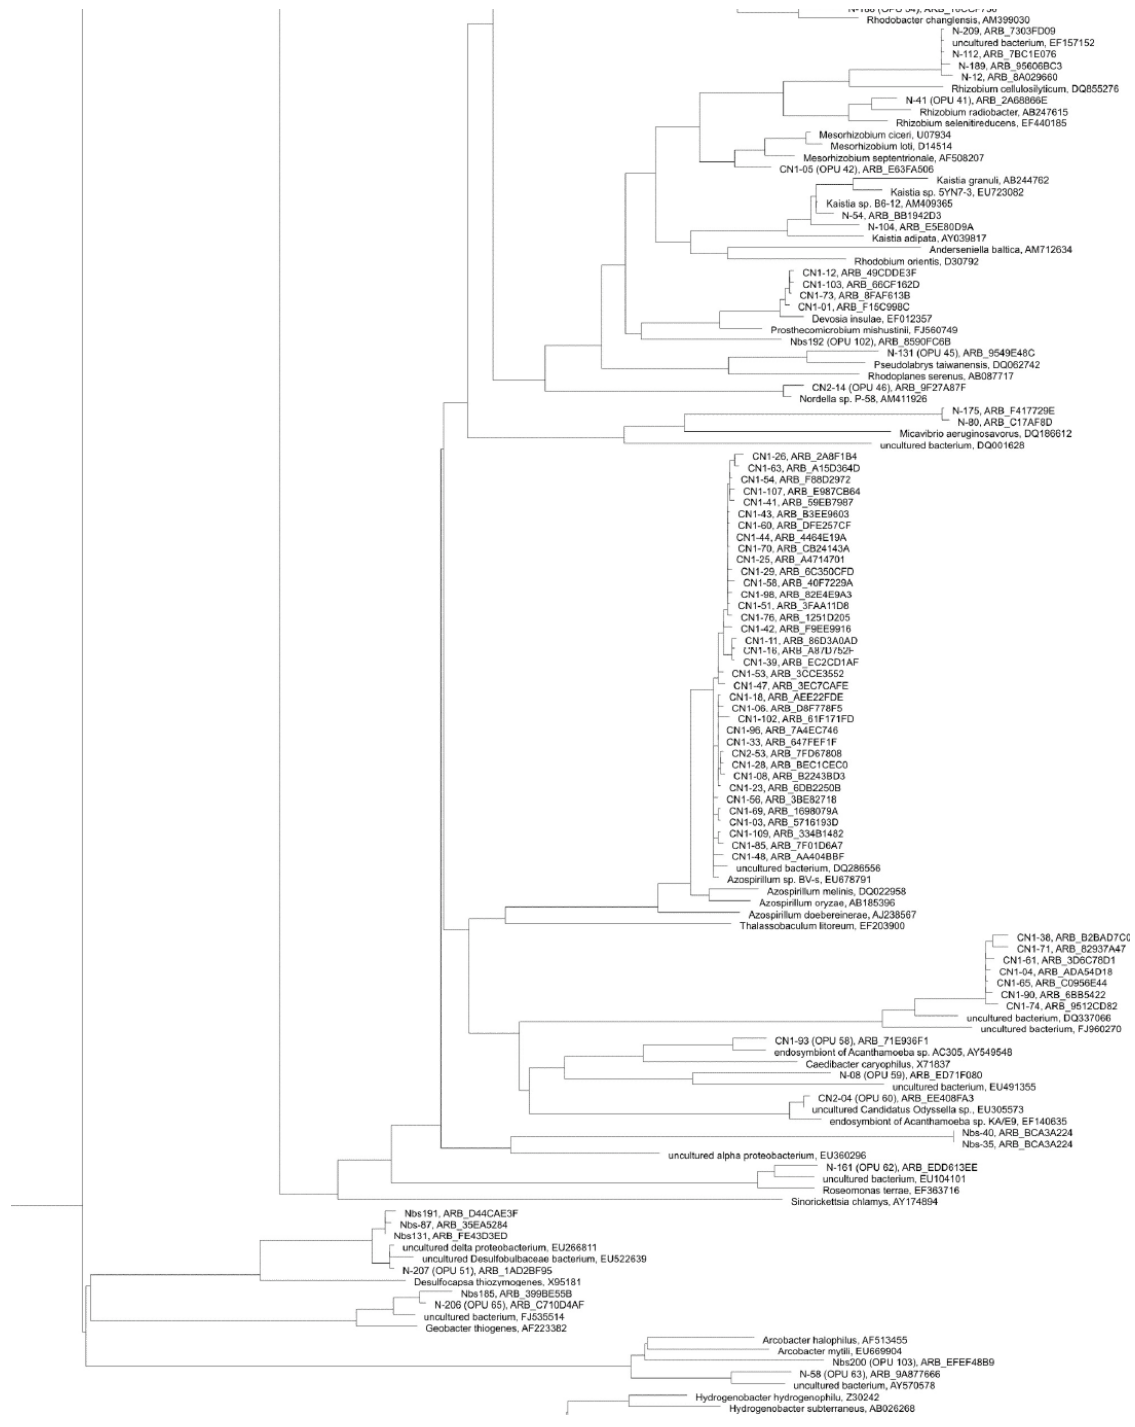

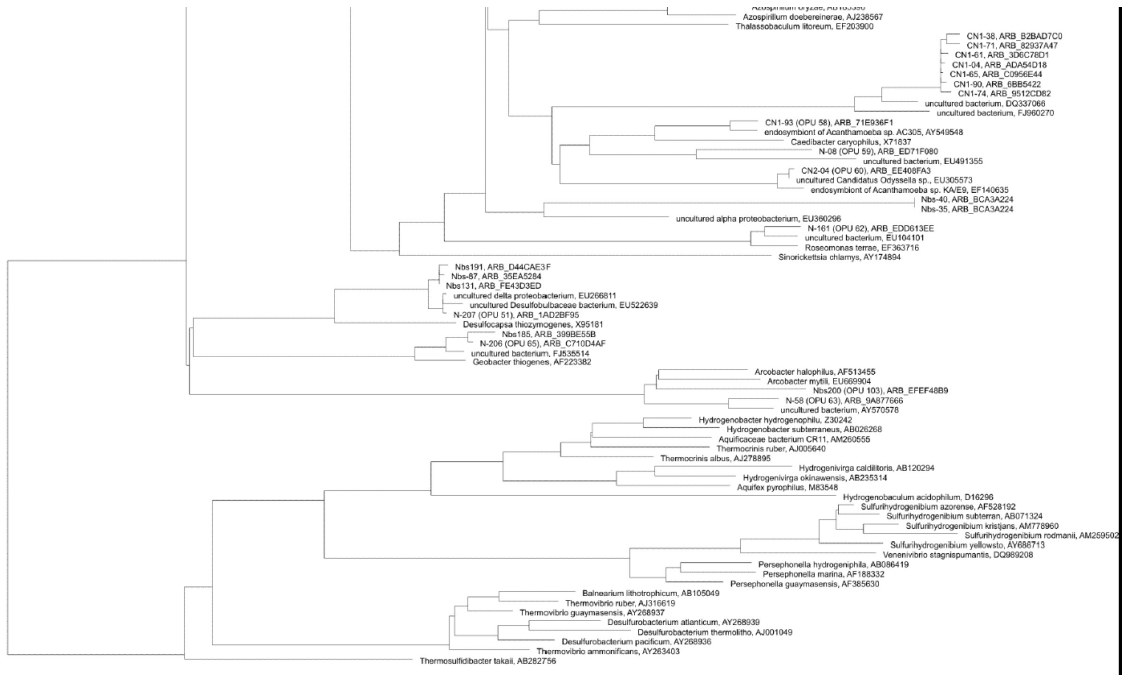

Figure S5 cont. (7)



Figure S6

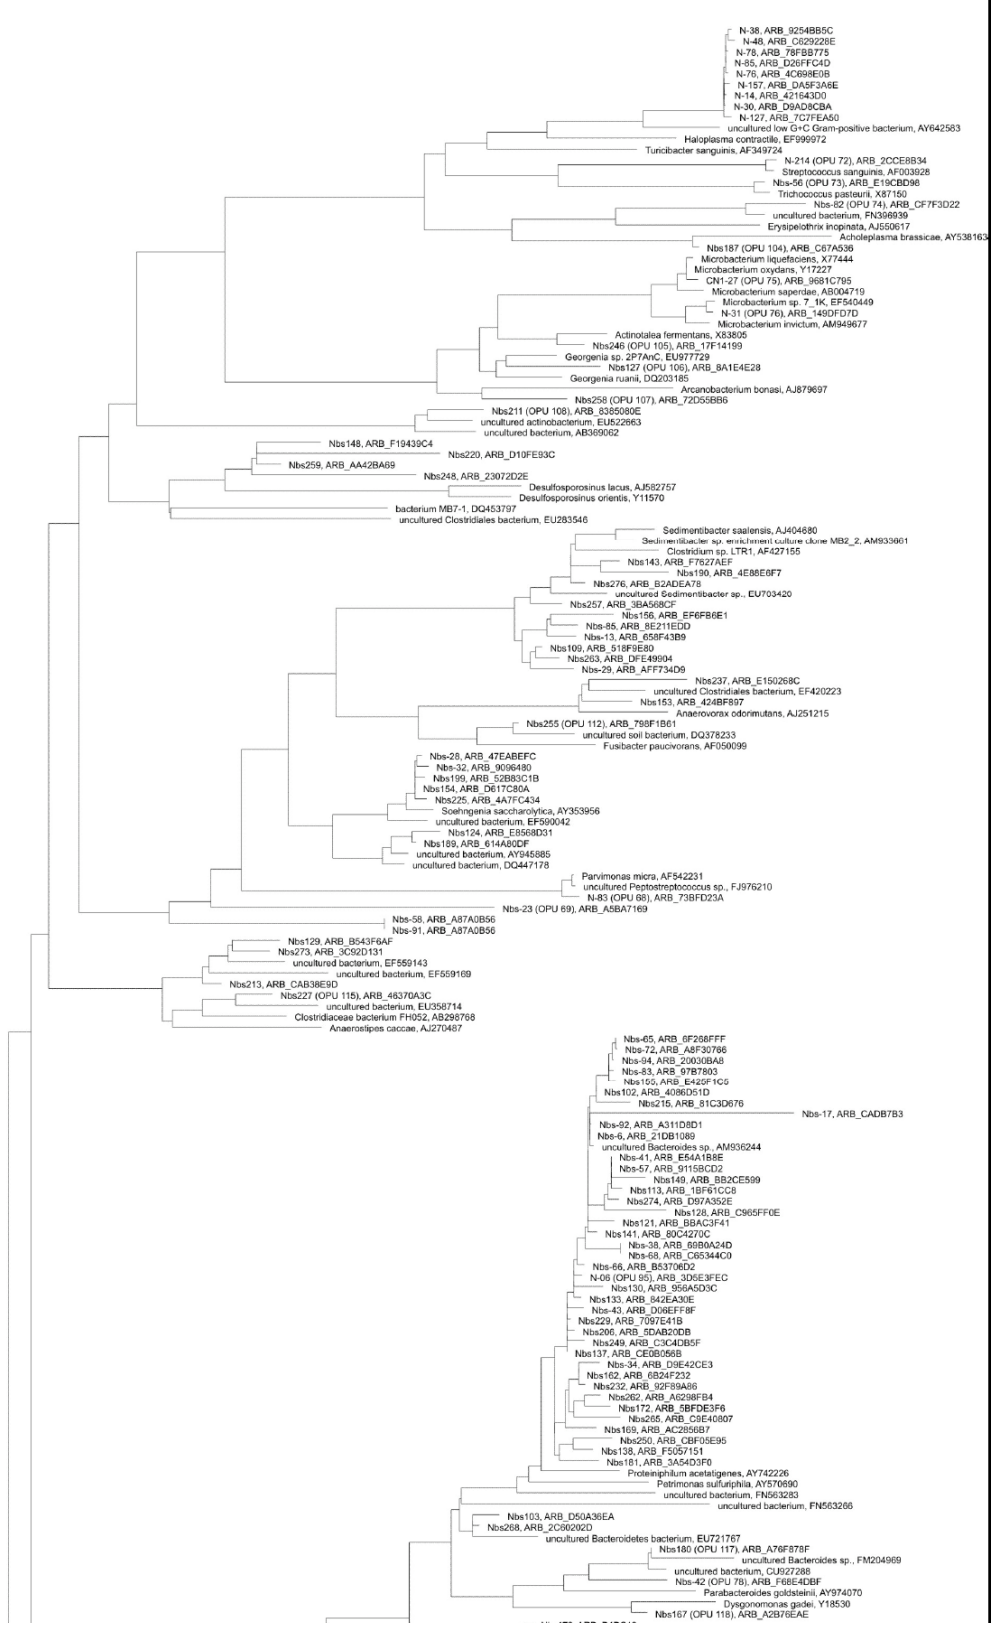



Figure S6 cont. (1)

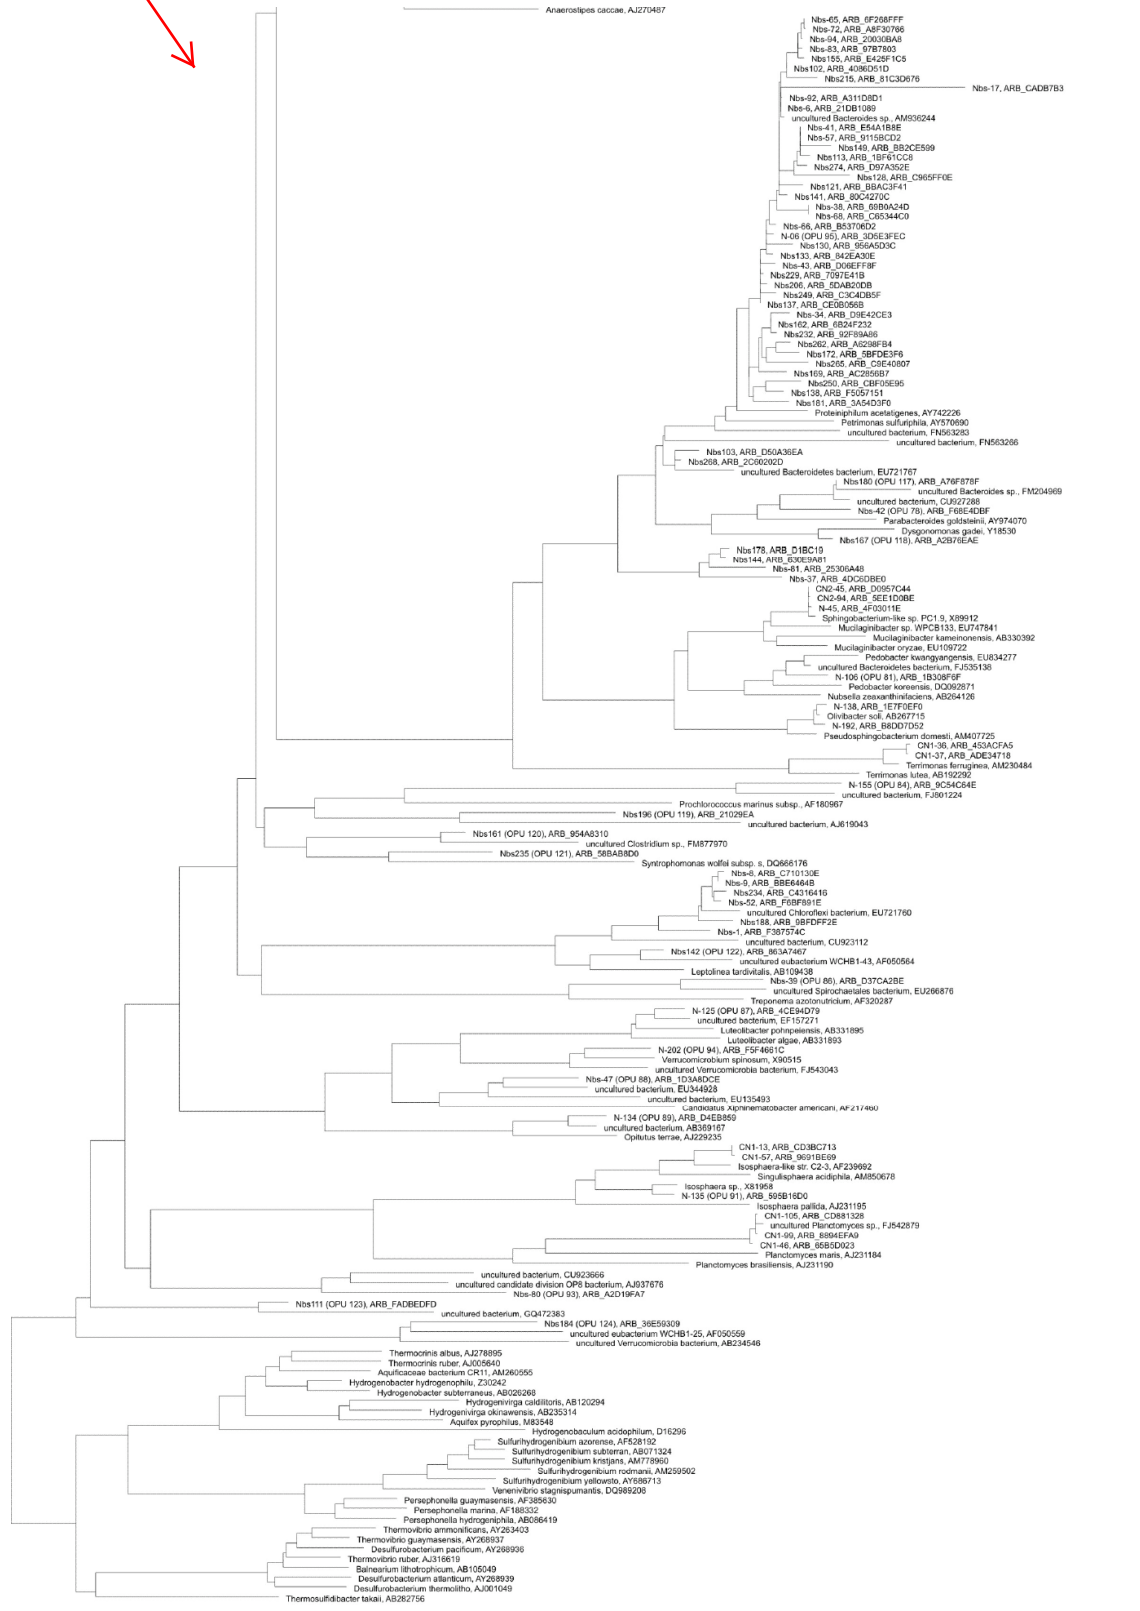

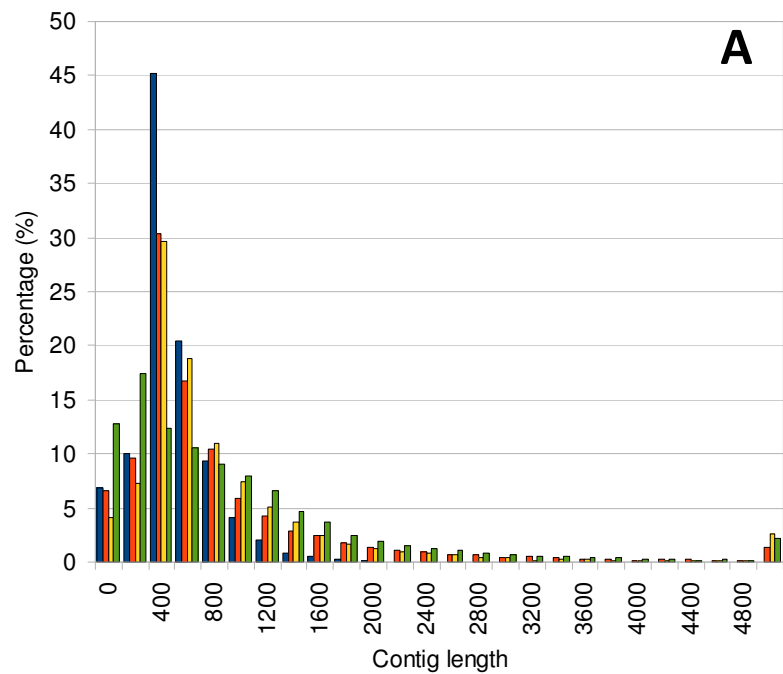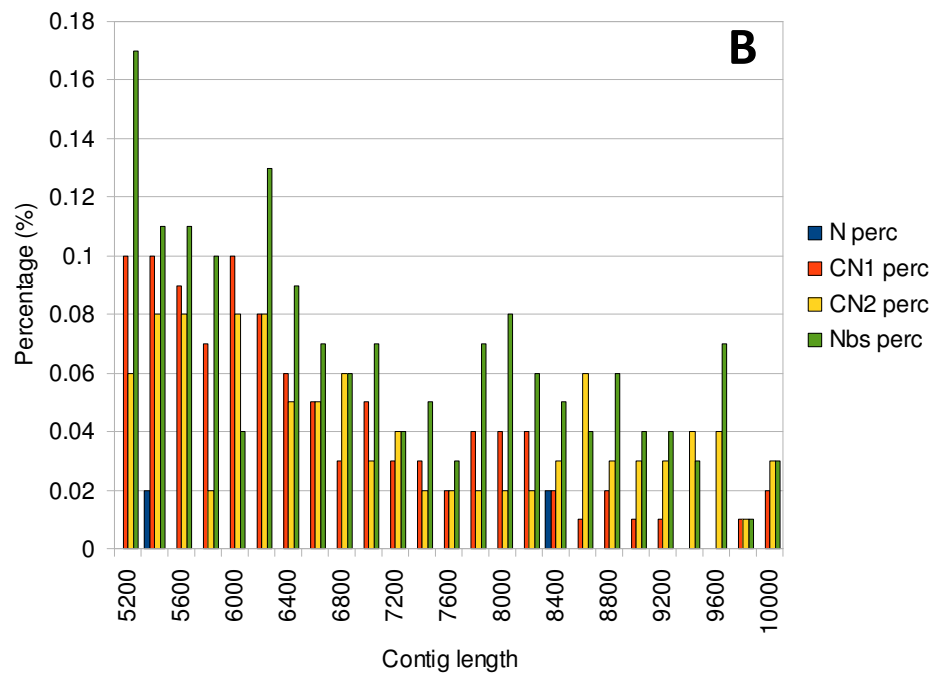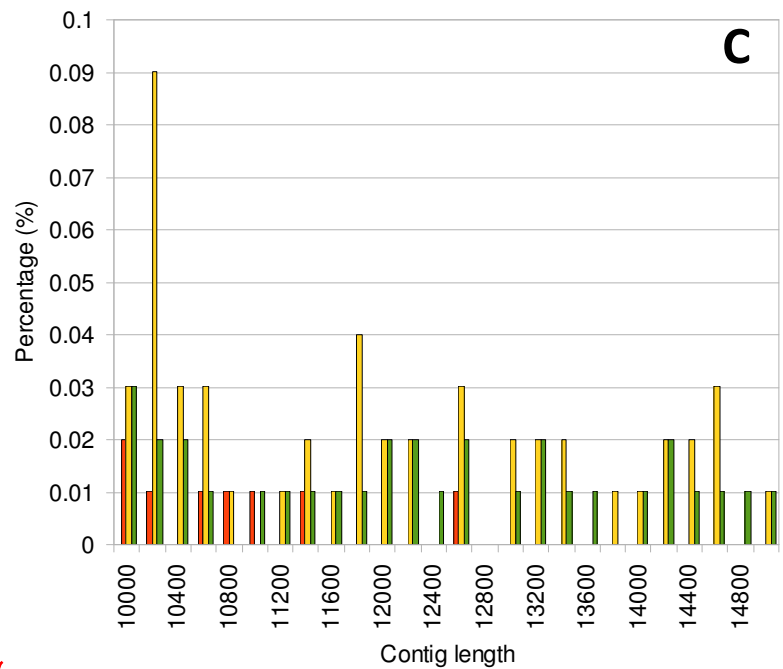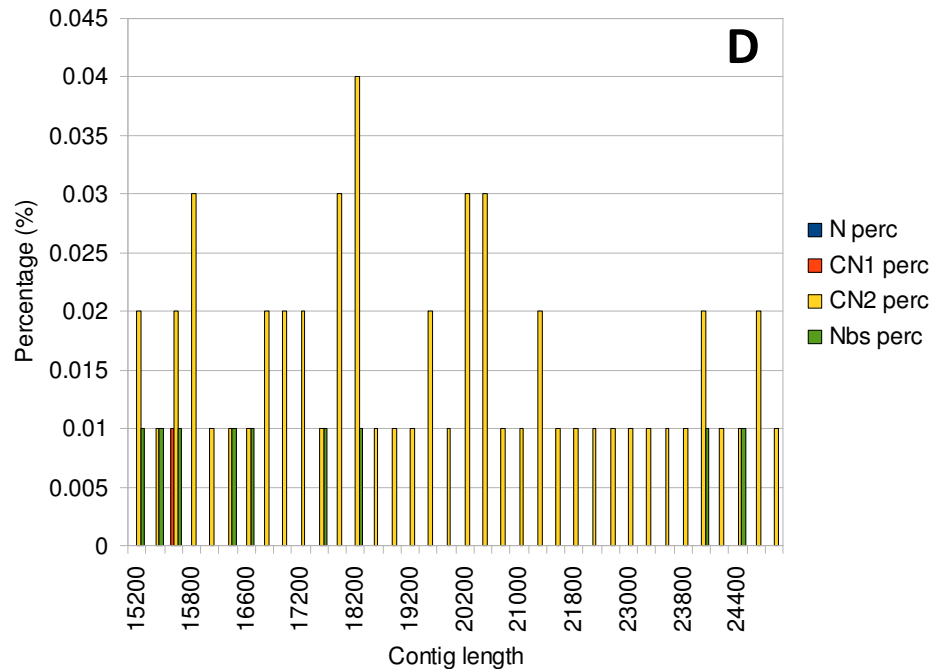

Figure S7
